# Supplementary material for: MHC class II proteins mediate cross-species entry of bat influenza viruses
Source: Springer Nature journal article supplement (doi:10.1038/s41586-019-0955-3), 2019-02-20
Supplement: MOESM3 [file 41586_2019_955_MOESM3_ESM%20(1).xlsx]

## Sheet: CRISPR screen_gene_summary
id	num	neg|score	neg|p-value	neg|fdr	neg|rank	neg|goodsgrna	neg|lfc	pos|score	pos|p-value	pos|fdr	pos|rank	pos|goodsgrna	pos|lfc
CXorf49B	4	0.081247	0.0025898	0.000619	1	4	-29937	0.99999	1.0	1.0	19114	0	-29937
SOGA3	4	0.12001	0.0025898	0.000619	2	4	-1845	0.99685	1.0	1.0	18945	0	-1845
SFT2D3	4	0.13504	0.0025898	0.000619	3	4	-27863	0.99999	1.0	1.0	19113	0	-27863
PDSS2	4	0.17315	0.0025898	0.000619	4	4	-27556	0.99998	1.0	1.0	19112	0	-27556
TFE3	4	0.19226	0.0025898	0.000619	5	3	-17247	0.61833	0.51487	0.835816	11754	1	-17247
CDK2	4	0.26562	0.0025898	0.000619	6	4	-27625	0.99997	1.0	1.0	19111	0	-27625
ADRB1	4	0.30007	0.0025898	0.000619	7	3	-2024	0.82775	0.84734	1.0	15823	0	-2024
TMEM110-MUSTN1	4	0.32209	0.0025898	0.000619	8	4	-27126	0.99997	1.0	1.0	19110	0	-27126
SLC27A2	4	0.39287	0.038848	0.000665	9	3	-13144	0.063265	0.071612	0.514136	2598	1	-13144
CUL4B	4	0.39287	0.038848	0.000665	10	4	-21714	0.98652	0.99998	1.0	18607	0	-21714
ANOS1	4	0.46299	0.075106	0.000665	11	4	-33619	0.99995	1.0	1.0	19109	0	-33619
FOS	4	0.46299	0.075106	0.000665	12	4	-29987	0.99995	1.0	1.0	19108	0	-29987
NUDC	4	0.46299	0.075106	0.000665	13	4	-23866	0.99995	1.0	1.0	19107	0	-23866
NOA1	4	0.51343	0.075106	0.000665	14	3	-22595	0.72607	0.66686	0.918738	13857	0	-22595
SLC39A8	4	0.51343	0.075106	0.000665	15	4	-23626	0.99994	1.0	1.0	19105	0	-23626
RPS8	4	0.51343	0.075106	0.000665	16	3	-13992	0.29085	0.27934	0.692063	7456	1	-13992
FUT7	4	0.55912	0.075106	0.000665	17	4	-27556	0.99994	1.0	1.0	19106	0	-27556
ANKRD53	4	0.66835	0.075106	0.000665	18	4	-28623	0.99993	1.0	1.0	19102	0	-28623
DUX4	4	0.66835	0.075106	0.000665	19	4	-29003	0.99993	1.0	1.0	19104	0	-29003
C20orf96	4	0.66835	0.075106	0.000665	20	4	-3215	0.99993	1.0	1.0	19103	0	-3215
FBXO4	4	0.66835	0.075106	0.000665	21	4	-33597	0.99993	1.0	1.0	19101	0	-33597
RSU1	4	0.92884	0.075106	0.000665	22	4	-34666	0.99991	1.0	1.0	19100	0	-34666
LEMD1	4	0.0001113	0.075106	0.000665	23	4	-28716	0.99584	1.0	1.0	18899	0	-28716
NME3	4	0.0001113	0.075106	0.000665	24	4	-29231	0.98672	0.99998	1.0	18615	0	-29231
DDX46	4	0.0001113	0.075106	0.000665	25	4	-18694	0.98432	0.99998	1.0	18546	0	-18694
POLR2A	4	0.00012834	0.075106	0.000665	26	4	-0.91187	0.99987	1.0	1.0	19098	0	-0.91187
AKIRIN2	4	0.00012834	0.075106	0.000665	27	4	-23257	0.99987	1.0	1.0	19099	0	-23257
FAM104A	4	0.00012834	0.075106	0.000665	28	4	-23132	0.99987	1.0	1.0	19097	0	-23132
DDX21	4	0.00012834	0.075106	0.000665	29	4	-22664	0.99987	1.0	1.0	19095	0	-22664
KXD1	4	0.00012834	0.075106	0.000665	30	4	-1572	0.99987	1.0	1.0	19096	0	-1572
FPGS	4	0.0001367	0.075106	0.000665	31	3	-17602	0.30952	0.2852	0.692063	7652	1	-17602
KIAA1024	4	0.0001367	0.075106	0.000665	32	4	-25767	0.99811	1.0	1.0	19000	0	-25767
CHMP2A	4	0.0001367	0.075106	0.000665	33	3	-15437	0.25529	0.2702	0.692063	7077	1	-15437
NOL7	4	0.0001367	0.075106	0.000665	34	3	-2533	0.18425	0.16898	0.586107	5485	1	-2533
SELT	4	0.0001367	0.075106	0.000665	35	4	-24368	0.99918	1.0	1.0	19065	0	-24368
RPL12	4	0.0001367	0.075106	0.000665	36	4	-26179	0.99885	1.0	1.0	19041	0	-26179
CIRH1A	4	0.0001367	0.075106	0.000665	37	3	-19319	0.0082901	0.0053783	0.191822	522	1	-19319
ING3	4	0.00017516	0.075106	0.000665	38	4	-33122	0.99982	1.0	1.0	19094	0	-33122
ANXA8L1	4	0.00020088	0.075106	0.000665	39	4	-34078	0.9998	1.0	1.0	19092	0	-34078
KIR3DL2	4	0.00020088	0.075106	0.000665	40	4	-32159	0.9998	1.0	1.0	19091	0	-32159
POLD1	4	0.00020088	0.075106	0.000665	41	4	-34934	0.9998	1.0	1.0	19093	0	-34934
UTP15	4	0.00022862	0.080285	0.000665	42	4	-34858	0.99977	1.0	1.0	19089	0	-34858
PAK1IP1	4	0.00022862	0.080285	0.000665	43	4	-30583	0.99977	1.0	1.0	19088	0	-30583
LOC100505841	4	0.00022862	0.080285	0.000665	44	4	-1535	0.99977	1.0	1.0	19090	0	-1535
MTHFS	4	0.00023063	0.080285	0.000665	45	3	-22241	0.92661	0.97526	1.0	17596	0	-22241
CCNO	4	0.00023063	0.080285	0.000665	46	3	-26938	0.50977	0.39621	0.745076	10084	1	-26938
PCBP1	4	0.00023063	0.080285	0.000665	47	4	-23352	0.99799	1.0	1.0	18994	0	-23352
SPRED2	4	0.00023063	0.080285	0.000665	48	4	-25089	0.99331	1.0	1.0	18828	0	-25089
XYLT1	4	0.00023063	0.080285	0.000665	49	4	-25235	0.98442	0.99998	1.0	18548	0	-25235
KPNB1	4	0.00024257	0.080285	0.000665	50	2	0.89079	0.015854	0.019309	0.373704	876	2	0.89079
KLF16	4	0.00024257	0.080285	0.000665	51	3	-1656	0.38721	0.31895	0.710033	8542	1	-1656
C16orf92	4	0.00024257	0.080285	0.000665	52	3	-13916	0.89494	0.94328	1.0	17058	0	-13916
TAF6	4	0.00025856	0.080285	0.000665	53	4	-33841	0.99974	1.0	1.0	19087	0	-33841
SLC22A8	4	0.00025856	0.080285	0.000665	54	4	-3634	0.99974	1.0	1.0	19086	0	-3634
TBX10	4	0.00025856	0.080285	0.000665	55	4	-36371	0.99974	1.0	1.0	19085	0	-36371
NIPBL	4	0.00029227	0.080285	0.000665	56	4	-22021	0.99971	1.0	1.0	19083	0	-22021
HIST2H3D	4	0.00029227	0.080285	0.000665	57	4	-17025	0.99971	1.0	1.0	19084	0	-17025
SLC4A10	4	0.00029587	0.080285	0.000665	58	3	-21555	0.80124	0.80664	1.0	15318	0	-21555
PPEF2	4	0.00029587	0.080285	0.000665	59	4	-28682	0.99758	1.0	1.0	18973	0	-28682
CEP78	4	0.00029587	0.080285	0.000665	60	4	-28682	0.99758	1.0	1.0	18978	0	-28682
SNRNP200	4	0.00029587	0.080285	0.000665	61	4	-28682	0.99729	1.0	1.0	18959	0	-28682
PROX1	4	0.00029587	0.080285	0.000665	62	4	-28682	0.97439	0.99981	1.0	18369	0	-28682
PPP1R15A	4	0.00033297	0.080285	0.000665	63	4	-30207	0.99967	1.0	1.0	19082	0	-30207
MYRF	4	0.00033297	0.080285	0.000665	64	4	-17884	0.99967	1.0	1.0	19081	0	-17884
SLC7A6	4	0.0003743	0.080285	0.000665	65	4	-33798	0.99963	1.0	1.0	19080	0	-33798
DNAJB1	4	0.0003752	0.080285	0.000665	66	3	-23978	0.79451	0.79354	0.997797	15182	0	-23978
TEX261	4	0.0003752	0.080285	0.000665	67	3	-25767	0.091538	0.096795	0.514136	3282	1	-25767
ZBTB14	4	0.0003752	0.080285	0.000665	68	3	-25089	0.56829	0.45143	0.783395	10956	1	-25089
CCDC51	4	0.0003752	0.080285	0.000665	69	4	-29323	0.99247	1.0	1.0	18788	0	-29323
GOLPH3	4	0.0003752	0.080285	0.000665	70	3	-21944	0.2252	0.22687	0.676745	6393	1	-21944
PRR20B	4	0.0003752	0.080285	0.000665	71	3	-25211	0.70484	0.64808	0.918738	13404	0	-25211
ZNHIT2	4	0.00038171	0.15798	0.000665	72	4	-22424	0.99846	1.0	1.0	19019	0	-22424
EPC1	4	0.00038171	0.15798	0.000665	73	3	-12034	0.51159	0.39621	0.745076	10112	1	-12034
GPS1	4	0.00041446	0.23568	0.000665	74	4	-32095	0.99959	1.0	1.0	19079	0	-32095
LIPA	4	0.00045883	0.23568	0.000665	75	4	-37428	0.99954	1.0	1.0	19078	0	-37428
GRP	4	0.00047427	0.23568	0.000665	76	4	-26052	0.98255	0.99996	1.0	18510	0	-26052
FGF12	4	0.00047427	0.23568	0.000665	77	3	-18692	0.5691	0.45143	0.783395	10971	1	-18692
NCDN	4	0.00047427	0.23568	0.000665	78	3	-26242	0.19152	0.17624	0.591552	5654	1	-26242
HSPE1	4	0.00050911	0.23568	0.000665	79	4	-35505	0.99949	1.0	1.0	19076	0	-35505
GUCA1A	4	0.00050911	0.23568	0.000665	80	4	-22242	0.99949	1.0	1.0	19075	0	-22242
TUBB4B	4	0.00050911	0.23568	0.000665	81	4	-36765	0.99949	1.0	1.0	19077	0	-36765
DMRT2	4	0.00056291	0.23568	0.000665	82	3	-15437	0.26725	0.2734	0.692063	7199	1	-15437
ATP6V1B2	4	0.00056291	0.23568	0.000665	83	2	-0.30696	0.54121	0.42199	0.762264	10554	1	-0.30696
MFSD11	4	0.00056291	0.23568	0.000665	84	3	-16399	0.91918	0.97043	1.0	17464	0	-16399
GUCA1C	4	0.00056291	0.23568	0.000665	85	3	-18005	0.21439	0.21454	0.660911	6175	1	-18005
GAREML	4	0.00056291	0.23568	0.000665	86	4	-27627	0.99894	1.0	1.0	19046	0	-27627
PTPN20	4	0.00056291	0.23568	0.000665	87	4	-30027	0.99225	1.0	1.0	18774	0	-30027
EIF5A	4	0.00056291	0.23568	0.000665	88	3	-17247	0.89765	0.94604	1.0	17107	0	-17247
RPL36A-HNRNPH2	4	0.00058434	0.23568	0.000665	89	4	-26346	0.97328	0.99974	1.0	18350	0	-26346
HSD11B1L	4	0.00058434	0.23568	0.000665	90	4	-15531	0.94593	0.99017	1.0	17922	0	-15531
CRYM	4	0.00058434	0.23568	0.000665	91	3	-26051	0.70552	0.64989	0.918738	13421	0	-26051
RPL10A	4	0.00058434	0.23568	0.000665	92	3	-2963	0.53119	0.412	0.756224	10389	1	-2963
LMBR1L	4	0.00058434	0.23568	0.000665	93	3	-23257	0.028032	0.027937	0.374832	1420	1	-23257
MED14	4	0.00058434	0.23568	0.000665	94	4	-27745	0.99918	1.0	1.0	19062	0	-27745
XYLT2	4	0.00062286	0.23568	0.000665	95	4	-34169	0.99938	1.0	1.0	19073	0	-34169
C16orf82	4	0.00062286	0.23568	0.000665	96	4	-21725	0.99938	1.0	1.0	19074	0	-21725
ARL10	4	0.00062286	0.23568	0.000665	97	4	-3978	0.99938	1.0	1.0	19071	0	-3978
LARP7	4	0.00062286	0.23568	0.000665	98	4	-38176	0.99938	1.0	1.0	19072	0	-38176
TVP23C	4	0.00068427	0.23568	0.000665	99	4	-37189	0.99932	1.0	1.0	19068	0	-37189
PTPRC	4	0.00068427	0.23568	0.000665	100	4	-37454	0.99932	1.0	1.0	19069	0	-37454
RPL13A	4	0.00068427	0.23568	0.000665	101	4	-39929	0.99932	1.0	1.0	19070	0	-39929
ENDOG	4	0.00070525	0.23568	0.000665	102	3	-29924	0.62691	0.54066	0.867801	11896	1	-29924
ZBTB45	4	0.00070525	0.23568	0.000665	103	3	-24368	0.021645	0.02323	0.373704	1145	1	-24368
RBM26	4	0.00074719	0.23568	0.000665	104	4	-34307	0.99925	1.0	1.0	19067	0	-34307
HTR6	4	0.00074719	0.23568	0.000665	105	4	-36895	0.99925	1.0	1.0	19066	0	-36895
POLR1C	4	0.00081685	0.23568	0.000665	106	4	-38729	0.99918	1.0	1.0	19063	0	-38729
LMX1B	4	0.00081685	0.23568	0.000665	107	4	-35992	0.99918	1.0	1.0	19064	0	-35992
RINT1	4	0.00085056	0.23568	0.000665	108	4	-31363	0.98825	0.99999	1.0	18658	0	-31363
CA1	4	0.00085056	0.23568	0.000665	109	4	-29102	0.98848	0.99999	1.0	18666	0	-29102
CHAF1B	4	0.00085056	0.23568	0.000665	110	3	-17028	0.57469	0.45943	0.791716	11049	1	-17028
MT1E	4	0.00085056	0.23568	0.000665	111	3	-23001	0.41335	0.33663	0.719007	8829	1	-23001
AGK	4	0.00085056	0.23568	0.000665	112	3	-30808	0.20776	0.20568	0.652531	6012	1	-30808
PSMD7	4	0.00085056	0.23568	0.000665	113	3	-24007	0.10302	0.10504	0.514136	3572	1	-24007
MCM4	4	0.00085056	0.23568	0.000665	114	3	-20705	0.31782	0.28721	0.692063	7740	1	-20705
CT47A12	4	0.00086429	0.23568	0.000665	115	2	0.26831	0.083001	0.089491	0.514136	3060	2	0.26831
TEX43	4	0.00086429	0.23568	0.000665	116	3	-17025	0.47229	0.37637	0.738265	9572	1	-17025
NIPSNAP3B	4	0.00086429	0.23568	0.000665	117	2	-0.66264	0.82979	0.84975	1.0	15867	0	-0.66264
RPL14	4	0.00086429	0.23568	0.000665	118	3	-12039	0.86827	0.90983	1.0	16575	0	-12039
CDC37	4	0.00086429	0.23568	0.000665	119	2	0.60188	0.024905	0.025872	0.373704	1292	2	0.60188
THAP10	4	0.00086429	0.23568	0.000665	120	4	-18632	0.94656	0.99043	1.0	17929	0	-18632
GLT8D1	4	0.00086429	0.23568	0.000665	121	4	-28976	0.99289	1.0	1.0	18803	0	-28976
MFAP1	4	0.00086429	0.23568	0.000665	122	2	-0.62175	0.68133	0.61481	0.909177	12923	0	-0.62175
NOX5	4	0.00086429	0.23568	0.000665	123	2	-0.20074	0.7026	0.64623	0.918738	13364	0	-0.20074
TMEM19	4	0.00086429	0.23568	0.000665	124	4	-28976	0.99835	1.0	1.0	19013	0	-28976
VPS33B	4	0.0008946	0.23568	0.000665	125	4	-33798	0.99911	1.0	1.0	19061	0	-33798
TG	4	0.0008946	0.23568	0.000665	126	4	-35324	0.99911	1.0	1.0	19060	0	-35324
INTS10	4	0.0008946	0.23568	0.000665	127	4	-28348	0.99911	1.0	1.0	19059	0	-28348
CLTA	4	0.00097449	0.23568	0.000665	128	4	-38511	0.99903	1.0	1.0	19057	0	-38511
PHC2	4	0.00097449	0.23568	0.000665	129	4	-34014	0.99903	1.0	1.0	19058	0	-34014
PPAN-P2RY11	4	0.00097449	0.23568	0.000665	130	4	-40804	0.99903	1.0	1.0	19056	0	-40804
SLC6A8	4	0.0010218	0.23568	0.000665	131	3	-20927	0.29177	0.27934	0.692063	7462	1	-20927
TAGAP	4	0.0010218	0.23568	0.000665	132	4	-30085	0.9878	0.99999	1.0	18640	0	-30085
PDCD7	4	0.0010218	0.23568	0.000665	133	4	-27396	0.97817	0.99992	1.0	18424	0	-27396
RC3H1	4	0.0010218	0.23568	0.000665	134	3	-31091	0.59719	0.48127	0.806754	11395	1	-31091
ASCL4	4	0.0010218	0.23568	0.000665	135	3	-25745	0.87872	0.92339	1.0	16769	0	-25745
CAMSAP3	4	0.0010218	0.23568	0.000665	136	3	-24205	0.24937	0.26252	0.692063	6955	1	-24205
SF3A2	4	0.0010218	0.23568	0.000665	137	4	-31897	0.99685	1.0	1.0	18938	0	-31897
CPSF2	4	0.0010218	0.23568	0.000665	138	4	-32159	0.99528	1.0	1.0	18884	0	-32159
PLAC9	4	0.0010218	0.23568	0.000665	139	3	-26488	0.55348	0.43382	0.768953	10729	1	-26488
RUVBL1	4	0.0010218	0.23568	0.000665	140	3	-27946	0.83781	0.86052	1.0	16014	0	-27946
SLC25A5	4	0.0010218	0.23568	0.000665	141	3	-27995	0.089951	0.09479	0.514136	3244	1	-27995
RPL11	4	0.0010218	0.23568	0.000665	142	3	-29199	0.34838	0.29525	0.692063	8099	1	-29199
KLHL30	4	0.0010564	0.23568	0.000665	143	4	-37481	0.99894	1.0	1.0	19048	0	-37481
KLF8	4	0.0010564	0.23568	0.000665	144	4	-34934	0.99894	1.0	1.0	19055	0	-34934
C2orf15	4	0.0010564	0.23568	0.000665	145	4	-37074	0.99894	1.0	1.0	19053	0	-37074
SLC16A10	4	0.0010564	0.23568	0.000665	146	4	-35943	0.99894	1.0	1.0	19052	0	-35943
MMP21	4	0.0010564	0.23568	0.000665	147	4	-39951	0.99894	1.0	1.0	19054	0	-39951
RAB3GAP1	4	0.0010564	0.23568	0.000665	148	4	-3382	0.99894	1.0	1.0	19050	0	-3382
LMAN2	4	0.0010564	0.23568	0.000665	149	4	-39615	0.99894	1.0	1.0	19047	0	-39615
ZNF764	4	0.0010564	0.23568	0.000665	150	4	-34953	0.99894	1.0	1.0	19049	0	-34953
PEX12	4	0.0010564	0.23568	0.000665	151	4	-29088	0.99894	1.0	1.0	19051	0	-29088
MRPL2	4	0.0011478	0.23568	0.000665	152	4	-34731	0.99885	1.0	1.0	19043	0	-34731
KIAA1217	4	0.0011478	0.23568	0.000665	153	4	-35156	0.99885	1.0	1.0	19044	0	-35156
CEBPZ	4	0.0011478	0.23568	0.000665	154	4	-3916	0.99885	1.0	1.0	19042	0	-3916
ZNF644	4	0.0011478	0.23568	0.000665	155	4	-37027	0.99885	1.0	1.0	19045	0	-37027
DNAJC9	4	0.0012053	0.23568	0.000665	156	4	-18984	0.95913	0.99683	1.0	18126	0	-18984
GLA	4	0.0012053	0.23568	0.000665	157	3	-28622	0.78236	0.77331	0.988225	14951	0	-28622
ATXN7L2	4	0.0012053	0.23568	0.000665	158	4	-24007	0.94401	0.9886	1.0	17891	0	-24007
LRTOMT	4	0.0012053	0.23568	0.000665	159	3	-2.57	0.51591	0.39819	0.745076	10164	1	-2.57
B4GALNT4	4	0.0012053	0.23568	0.000665	160	3	-19098	0.21882	0.21896	0.66861	6257	1	-19098
NEURL1	4	0.0012053	0.23568	0.000665	161	3	-3215	0.75708	0.7227	0.953964	14482	0	-3215
LY6G5B	4	0.0012053	0.23568	0.000665	162	3	-26179	0.51013	0.39621	0.745076	10091	1	-26179
MGME1	4	0.0012331	0.23568	0.000665	163	4	-1845	0.96282	0.99811	1.0	18187	0	-1845
GADD45GIP1	4	0.0012331	0.23568	0.000665	164	2	-0.64185	0.80822	0.81816	1.0	15462	0	-0.64185
NDUFAF3	4	0.0012331	0.23568	0.000665	165	3	-17602	0.27284	0.2734	0.692063	7257	1	-17602
HIST1H2BA	4	0.0012331	0.23568	0.000665	166	4	-29722	0.98672	0.99998	1.0	18608	0	-29722
DNAI2	4	0.0012331	0.23568	0.000665	167	3	-15531	0.86875	0.91049	1.0	16583	0	-15531
SLC34A3	4	0.0012331	0.23568	0.000665	168	3	-19209	0.26559	0.2734	0.692063	7182	1	-19209
PRR3	4	0.0012331	0.23568	0.000665	169	2	0.086648	0.18834	0.17437	0.591552	5588	2	0.086648
ARHGAP8	4	0.0012331	0.23568	0.000665	170	3	-20522	0.6839	0.62165	0.913085	12974	0	-20522
APLP2	4	0.0012331	0.23568	0.000665	171	4	-30953	0.99247	1.0	1.0	18790	0	-30953
IL1B	4	0.0012331	0.23568	0.000665	172	3	-20522	0.58627	0.46938	0.797309	11232	1	-20522
HAO1	4	0.0012331	0.23568	0.000665	173	3	-20522	0.45399	0.36444	0.738265	9328	1	-20522
FITM1	4	0.001241	0.23568	0.000665	174	4	-3877	0.99876	1.0	1.0	19037	0	-3877
RPL18A	4	0.001241	0.23568	0.000665	175	4	-33841	0.99876	1.0	1.0	19038	0	-33841
ACTR3C	4	0.001241	0.23568	0.000665	176	4	-3698	0.99876	1.0	1.0	19040	0	-3698
CNBD2	4	0.001241	0.23568	0.000665	177	4	-37659	0.99876	1.0	1.0	19036	0	-37659
GUK1	4	0.001241	0.23568	0.000665	178	4	-30583	0.99876	1.0	1.0	19039	0	-30583
ACOT13	4	0.0013329	0.23568	0.000665	179	4	-3.4	0.99867	1.0	1.0	19035	0	-3.4
SPCS2	4	0.0013329	0.23568	0.000665	180	4	-34021	0.99867	1.0	1.0	19034	0	-34021
FDPS	4	0.0013329	0.23568	0.000665	181	4	-32142	0.99867	1.0	1.0	19033	0	-32142
FGFBP3	4	0.0014003	0.23568	0.000665	182	4	-3184	0.99449	1.0	1.0	18862	0	-3184
CYP2A6	4	0.0014003	0.23568	0.000665	183	3	-28378	0.86417	0.90578	1.0	16491	0	-28378
NUP107	4	0.0014003	0.23568	0.000665	184	3	-19376	0.92364	0.9737	1.0	17544	0	-19376
KCND1	4	0.0014003	0.23568	0.000665	185	3	-20705	0.78902	0.78368	0.990488	15072	0	-20705
ZNF581	4	0.0014003	0.23568	0.000665	186	3	-21058	0.76247	0.731	0.95627	14595	0	-21058
CALCOCO2	4	0.0014003	0.23568	0.000665	187	4	-30583	0.99155	1.0	1.0	18749	0	-30583
UTP6	4	0.0014003	0.23568	0.000665	188	3	-30085	0.33211	0.28922	0.692063	7905	1	-30085
IL1R2	4	0.0014003	0.23568	0.000665	189	3	-26549	0.23517	0.24494	0.692063	6609	1	-26549
FAM96B	4	0.0014003	0.23568	0.000665	190	4	-32394	0.99567	1.0	1.0	18895	0	-32394
AOC3	4	0.0014314	0.23568	0.000665	191	4	-3978	0.99857	1.0	1.0	19025	0	-3978
FBN2	4	0.0014314	0.23568	0.000665	192	4	-39037	0.99857	1.0	1.0	19029	0	-39037
ERVFRD-1	4	0.0014314	0.23568	0.000665	193	4	-3881	0.99857	1.0	1.0	19028	0	-3881
POP4	4	0.0014314	0.23568	0.000665	194	4	-3041	0.99857	1.0	1.0	19030	0	-3041
C6orf47	4	0.0014314	0.23568	0.000665	195	4	-3634	0.99857	1.0	1.0	19026	0	-3634
TIMM17B	4	0.0014314	0.23568	0.000665	196	4	-35511	0.99857	1.0	1.0	19027	0	-35511
PRKCDBP	4	0.0014314	0.23568	0.000665	197	4	-40334	0.99857	1.0	1.0	19032	0	-40334
WBSCR16	4	0.0014314	0.23568	0.000665	198	4	-35986	0.99857	1.0	1.0	19031	0	-35986
CD276	4	0.0015394	0.23568	0.000665	199	4	-40081	0.99846	1.0	1.0	19018	0	-40081
RTN4R	4	0.0015394	0.23568	0.000665	200	4	-31546	0.99846	1.0	1.0	19022	0	-31546
SPINK4	4	0.0015394	0.23568	0.000665	201	4	-3992	0.99846	1.0	1.0	19021	0	-3992
GSPT1	4	0.0015394	0.23568	0.000665	202	4	-38766	0.99846	1.0	1.0	19023	0	-38766
C19orf12	4	0.0015394	0.23568	0.000665	203	4	-37379	0.99846	1.0	1.0	19020	0	-37379
PROSER3	4	0.0015394	0.23568	0.000665	204	4	-41359	0.99846	1.0	1.0	19024	0	-41359
GLIPR2	4	0.0016136	0.23568	0.000665	205	4	-33627	0.99716	1.0	1.0	18957	0	-33627
CASC10	4	0.0016136	0.23568	0.000665	206	3	-27236	0.93929	0.98574	1.0	17823	0	-27236
EEF1A1	4	0.0016136	0.23568	0.000665	207	4	-27308	0.97216	0.99963	1.0	18335	0	-27308
USPL1	4	0.0016136	0.23568	0.000665	208	3	-25211	0.2699	0.2734	0.692063	7224	1	-25211
TYW3	4	0.0016136	0.23568	0.000665	209	3	-28378	0.66677	0.59411	0.896533	12645	1	-28378
PMS1	4	0.0016545	0.23568	0.000665	210	4	-3909	0.99835	1.0	1.0	19011	0	-3909
CDC27	4	0.0016545	0.23568	0.000665	211	4	-39546	0.99835	1.0	1.0	19015	0	-39546
MT1M	4	0.0016545	0.23568	0.000665	212	4	-35761	0.99835	1.0	1.0	19012	0	-35761
DEF6	4	0.0016545	0.23568	0.000665	213	4	-3816	0.99835	1.0	1.0	19016	0	-3816
MAD2L2	4	0.0016545	0.23568	0.000665	214	4	-22181	0.99835	1.0	1.0	19017	0	-22181
MTFMT	4	0.0016545	0.23568	0.000665	215	4	-37157	0.99835	1.0	1.0	19014	0	-37157
DPF1	4	0.0016545	0.23568	0.000665	216	4	-35022	0.99835	1.0	1.0	19010	0	-35022
TRAM2	4	0.0016545	0.23568	0.000665	217	4	-41076	0.99835	1.0	1.0	19009	0	-41076
NDUFAF4	4	0.0016848	0.23568	0.000665	218	3	-17175	0.30952	0.2852	0.692063	7653	1	-17175
SNRPD2	4	0.0016848	0.23568	0.000665	219	2	-0.48564	0.80593	0.81586	1.0	15415	0	-0.48564
ARRDC1	4	0.0016848	0.23568	0.000665	220	2	-10986	0.61129	0.49904	0.819166	11629	1	-10986
ZNF600	4	0.0016848	0.23568	0.000665	221	3	-21056	0.57717	0.46144	0.791716	11094	1	-21056
KDM5C	4	0.0016848	0.23568	0.000665	222	3	-20429	0.30302	0.2852	0.692063	7586	1	-20429
RNF115	4	0.0016848	0.23568	0.000665	223	4	-30898	0.99823	1.0	1.0	19005	0	-30898
SDF2L1	4	0.0016848	0.23568	0.000665	224	2	-0.91845	0.2707	0.2734	0.692063	7234	1	-0.91845
RPN1	4	0.0016848	0.23568	0.000665	225	4	-21633	0.96644	0.99884	1.0	18252	0	-21633
TCTEX1D4	4	0.0016848	0.23568	0.000665	226	4	-16065	0.95587	0.99566	1.0	18079	0	-16065
LOC101927322	4	0.0017697	0.23568	0.000665	227	4	-30049	0.99823	1.0	1.0	19007	0	-30049
DIS3L	4	0.0017697	0.23568	0.000665	228	4	-31363	0.99823	1.0	1.0	19004	0	-31363
GOLGA8R	4	0.0017697	0.23568	0.000665	229	4	-39799	0.99823	1.0	1.0	19006	0	-39799
TTC27	4	0.0017697	0.23568	0.000665	230	4	-39229	0.99823	1.0	1.0	19008	0	-39229
HSH2D	4	0.0018417	0.23568	0.000665	231	3	-29734	0.92633	0.97526	1.0	17590	0	-29734
COL6A3	4	0.0018417	0.23568	0.000665	232	3	-30514	0.73198	0.67289	0.919302	13978	0	-30514
ZNF559-ZNF177	4	0.0018417	0.23568	0.000665	233	4	-33375	0.99635	1.0	1.0	18925	0	-33375
U2AF1L4	4	0.0018417	0.23568	0.000665	234	4	-29088	0.99372	1.0	1.0	18840	0	-29088
C2orf81	4	0.0018417	0.23568	0.000665	235	3	-26367	0.11198	0.1056	0.514136	3770	1	-26367
PKP2	4	0.0018417	0.23568	0.000665	236	3	-27946	0.58734	0.47036	0.798914	11254	1	-27946
OSGEPL1	4	0.0018417	0.23568	0.000665	237	3	-3215	0.93422	0.98196	1.0	17736	0	-3215
ATP5H	4	0.0018417	0.23568	0.000665	238	3	-24865	0.44489	0.36043	0.738265	9201	1	-24865
SOX4	4	0.0018417	0.23568	0.000665	239	3	-29227	0.26315	0.2734	0.692063	7163	1	-29227
PFKFB4	4	0.0018417	0.23568	0.000665	240	3	-27236	0.87187	0.91499	1.0	16634	0	-27236
SFXN5	4	0.0018852	0.23568	0.000665	241	4	-37807	0.99811	1.0	1.0	19003	0	-37807
NQO1	4	0.0018852	0.23568	0.000665	242	4	-42411	0.99811	1.0	1.0	18997	0	-42411
RNF149	4	0.0018852	0.23568	0.000665	243	4	-38872	0.99811	1.0	1.0	19001	0	-38872
ADGRE3	4	0.0018852	0.23568	0.000665	244	4	-40457	0.99811	1.0	1.0	18998	0	-40457
RCAN3	4	0.0018852	0.23568	0.000665	245	4	-33828	0.99811	1.0	1.0	19002	0	-33828
RASSF8	4	0.0018852	0.23568	0.000665	246	4	-41195	0.99811	1.0	1.0	18999	0	-41195
FIGN	4	0.0020099	0.23568	0.000665	247	4	-32305	0.99799	1.0	1.0	18993	0	-32305
ZNF526	4	0.0020099	0.23568	0.000665	248	4	-41997	0.99799	1.0	1.0	18990	0	-41997
RYR1	4	0.0020099	0.23568	0.000665	249	4	-38488	0.99799	1.0	1.0	18996	0	-38488
SLIT1	4	0.0020099	0.23568	0.000665	250	4	-41758	0.99799	1.0	1.0	18995	0	-41758
RGCC	4	0.0020099	0.23568	0.000665	251	4	-34884	0.99799	1.0	1.0	18991	0	-34884
MLLT6	4	0.0020099	0.23568	0.000665	252	4	-35833	0.99799	1.0	1.0	18992	0	-35833
BMS1	4	0.0021062	0.23568	0.000665	253	4	-33344	0.99743	1.0	1.0	18968	0	-33344
RPL36	4	0.0021062	0.23568	0.000665	254	3	-25425	0.32832	0.28922	0.692063	7856	1	-25425
LRRC45	4	0.0021062	0.23568	0.000665	255	4	-32527	0.99702	1.0	1.0	18952	0	-32527
C11orf57	4	0.0021062	0.23568	0.000665	256	3	-21714	0.77514	0.75704	0.975644	14828	0	-21714
RPS10-NUDT3	4	0.0021062	0.23568	0.000665	257	4	-29747	0.98513	0.99998	1.0	18574	0	-29747
WDR12	4	0.0021062	0.23568	0.000665	258	3	-26843	0.3908	0.32094	0.710033	8578	1	-26843
QRICH2	4	0.0021062	0.23568	0.000665	259	4	-30098	0.9698	0.99938	1.0	18298	0	-30098
STARD10	4	0.0021062	0.23568	0.000665	260	4	-2931	0.97872	0.99993	1.0	18436	0	-2931
INTS8	4	0.0021062	0.23568	0.000665	261	3	-29734	0.24371	0.25553	0.692063	6811	1	-29734
CMTM2	4	0.0021062	0.23568	0.000665	262	3	-21553	0.90372	0.95408	1.0	17197	0	-21553
PPP1R14A	4	0.0021062	0.23568	0.000665	263	3	-18574	0.34568	0.29525	0.692063	8070	1	-18574
U2AF2	4	0.0021062	0.23568	0.000665	264	3	-24941	0.071133	0.079638	0.514136	2784	1	-24941
EXOSC3	4	0.0021062	0.23568	0.000665	265	4	-21554	0.96367	0.99823	1.0	18202	0	-21554
LAMB1	4	0.0021428	0.23568	0.000665	266	4	-36045	0.99786	1.0	1.0	18989	0	-36045
NEDD1	4	0.0021428	0.23568	0.000665	267	4	-43025	0.99786	1.0	1.0	18988	0	-43025
CCDC65	4	0.0021428	0.23568	0.000665	268	4	-35252	0.99786	1.0	1.0	18985	0	-35252
RAB40B	4	0.0021428	0.23568	0.000665	269	4	-39735	0.99786	1.0	1.0	18986	0	-39735
SBSN	4	0.0021428	0.23568	0.000665	270	4	-38283	0.99786	1.0	1.0	18987	0	-38283
MYO7A	4	0.0022617	0.24086	0.000665	271	3	-2024	0.1962	0.1782	0.591579	5751	1	-2024
CDC7	4	0.0022617	0.24086	0.000665	272	2	-0.097703	0.25618	0.27145	0.692063	7095	2	-0.097703
LRTM1	4	0.0022617	0.24086	0.000665	273	3	-21553	0.331	0.28922	0.692063	7893	1	-21553
B4GAT1	4	0.0022617	0.24086	0.000665	274	3	-23161	0.74891	0.71421	0.950193	14304	0	-23161
ANXA3	4	0.0022617	0.24086	0.000665	275	2	-11086	0.1411	0.13022	0.555184	4456	1	-11086
CCNC	4	0.0022617	0.24086	0.000665	276	2	-0.18721	0.19495	0.1782	0.591579	5723	2	-0.18721
DRC1	4	0.0022617	0.24086	0.000665	277	4	-31395	0.98556	0.99998	1.0	18580	0	-31395
CCT8L2	4	0.0022617	0.24086	0.000665	278	2	0.10576	0.024589	0.025872	0.373704	1280	1	0.10576
MSI1	4	0.0022617	0.24086	0.000665	279	3	-16563	0.83302	0.855	1.0	15926	0	-16563
RPL10	4	0.0022617	0.24086	0.000665	280	2	-0.050678	0.036323	0.047745	0.513998	1744	2	-0.050678
BLOC1S1	4	0.0022794	0.24086	0.000665	281	4	-37148	0.99772	1.0	1.0	18980	0	-37148
ELK1	4	0.0022794	0.24086	0.000665	282	4	-37654	0.99772	1.0	1.0	18984	0	-37654
DDX27	4	0.0022794	0.24086	0.000665	283	4	-23485	0.99772	1.0	1.0	18979	0	-23485
TMEM159	4	0.0022794	0.24086	0.000665	284	4	-36299	0.99772	1.0	1.0	18983	0	-36299
FGF2	4	0.0022794	0.24086	0.000665	285	4	-30743	0.99772	1.0	1.0	18981	0	-30743
PIP5KL1	4	0.0022794	0.24086	0.000665	286	4	-35156	0.99772	1.0	1.0	18982	0	-35156
TCN2	4	0.0024186	0.24086	0.000665	287	4	-34522	0.98229	0.99996	1.0	18503	0	-34522
ISY1-RAB43	4	0.0024186	0.24086	0.000665	288	3	-30741	0.50154	0.38827	0.74264	9964	1	-30741
LOC100507462	4	0.0024186	0.24086	0.000665	289	3	-22665	0.84825	0.87627	1.0	16208	0	-22665
RELL2	4	0.0024186	0.24086	0.000665	290	3	-2766	0.13903	0.12953	0.555184	4413	1	-2766
HOMEZ	4	0.0024186	0.24086	0.000665	291	3	-32305	0.75406	0.7173	0.950193	14419	0	-32305
MZB1	4	0.0024186	0.24086	0.000665	292	3	-26843	0.27343	0.2734	0.692063	7268	1	-26843
TMCC3	4	0.0024186	0.24086	0.000665	293	3	-24205	0.44544	0.36043	0.738265	9209	1	-24205
EFNA1	4	0.0024186	0.24086	0.000665	294	4	-32742	0.98756	0.99999	1.0	18634	0	-32742
TAS2R8	4	0.0024186	0.24086	0.000665	295	3	-28157	0.89396	0.9414	1.0	17042	0	-28157
THOC7	4	0.0024186	0.24086	0.000665	296	3	-28917	0.59373	0.47531	0.799425	11349	1	-28917
LMAN2L	4	0.0024186	0.24086	0.000665	297	4	-34522	0.98672	0.99998	1.0	18611	0	-34522
PPIH	4	0.0024211	0.24086	0.000665	298	4	-34731	0.99758	1.0	1.0	18977	0	-34731
MS4A6A	4	0.0024211	0.24086	0.000665	299	4	-36876	0.99758	1.0	1.0	18972	0	-36876
ASB8	4	0.0024211	0.24086	0.000665	300	4	-40334	0.99758	1.0	1.0	18971	0	-40334
ST6GALNAC5	4	0.0024211	0.24086	0.000665	301	4	-41213	0.99758	1.0	1.0	18975	0	-41213
SLC30A5	4	0.0024211	0.24086	0.000665	302	4	-37883	0.99758	1.0	1.0	18970	0	-37883
MICA	4	0.0024211	0.24086	0.000665	303	4	-38766	0.99758	1.0	1.0	18976	0	-38766
SSBP1	4	0.0024211	0.24086	0.000665	304	4	-42444	0.99758	1.0	1.0	18969	0	-42444
GRHPR	4	0.0024211	0.24086	0.000665	305	4	-36236	0.99758	1.0	1.0	18974	0	-36236
TRAPPC3	4	0.0025654	0.24086	0.000665	306	4	-34232	0.99743	1.0	1.0	18967	0	-34232
EBF3	4	0.0025654	0.24086	0.000665	307	4	-35477	0.99743	1.0	1.0	18965	0	-35477
TRIP6	4	0.0025654	0.24086	0.000665	308	4	-35229	0.99743	1.0	1.0	18966	0	-35229
DDX49	4	0.0025654	0.24086	0.000665	309	4	-33437	0.99743	1.0	1.0	18963	0	-33437
ZNF408	4	0.0025654	0.24086	0.000665	310	4	-44415	0.99743	1.0	1.0	18962	0	-44415
HOXA4	4	0.0025654	0.24086	0.000665	311	4	-40121	0.99743	1.0	1.0	18964	0	-40121
EFTUD1	4	0.0027066	0.24086	0.000665	312	4	-40914	0.99729	1.0	1.0	18960	0	-40914
FN3KRP	4	0.0027066	0.24086	0.000665	313	4	-42042	0.99729	1.0	1.0	18958	0	-42042
ZNF114	4	0.0027066	0.24086	0.000665	314	4	-42844	0.99729	1.0	1.0	18961	0	-42844
RPL7A	4	0.0027123	0.24086	0.000665	315	3	-10723	0.93677	0.98403	1.0	17780	0	-10723
HELLS	4	0.0027123	0.24086	0.000665	316	4	-22873	0.99331	1.0	1.0	18820	0	-22873
SNAP23	4	0.0027123	0.24086	0.000665	317	3	-14754	0.72009	0.66244	0.918738	13716	0	-14754
NDUFB2	4	0.0027123	0.24086	0.000665	318	2	0.052595	0.089951	0.09479	0.514136	3245	1	0.052595
SAE1	4	0.0027123	0.24086	0.000665	319	3	-13643	0.65031	0.57229	0.884933	12322	1	-13643
ADGRD1	4	0.0027123	0.24086	0.000665	320	4	-0.80336	0.96023	0.9975	1.0	18149	0	-0.80336
ATG12	4	0.0027123	0.24086	0.000665	321	2	-0.13578	0.28971	0.27934	0.692063	7442	1	-0.13578
WDR87	4	0.0027562	0.24086	0.000665	322	3	-30764	0.65408	0.57429	0.884933	12400	1	-30764
ZNF830	4	0.0027562	0.24086	0.000665	323	3	-19745	0.018134	0.02059	0.373704	998	1	-19745
GJB3	4	0.0027562	0.24086	0.000665	324	4	-34953	0.99352	1.0	1.0	18830	0	-34953
CWC22	4	0.0027562	0.24086	0.000665	325	3	-32011	0.0087264	0.0054664	0.1925	542	1	-32011
FAM173B	4	0.0027562	0.24086	0.000665	326	3	-29617	0.39818	0.32295	0.710377	8665	1	-29617
TTC37	4	0.0027562	0.24086	0.000665	327	4	-34953	0.99155	1.0	1.0	18748	0	-34953
FSIP1	4	0.0027562	0.24086	0.000665	328	4	-28667	0.96588	0.99871	1.0	18243	0	-28667
TLR1	4	0.0027562	0.24086	0.000665	329	3	-2.69	0.87215	0.91499	1.0	16638	0	-2.69
CHD5	4	0.0027562	0.24086	0.000665	330	3	-22024	0.8844	0.9312	1.0	16875	0	-22024
STK32A	4	0.0027562	0.24086	0.000665	331	3	-30973	0.45909	0.37238	0.738265	9392	1	-30973
SERPINB13	4	0.0028383	0.24086	0.000665	332	4	-41749	0.99716	1.0	1.0	18955	0	-41749
ADSS	4	0.0028383	0.24086	0.000665	333	4	-36751	0.99716	1.0	1.0	18956	0	-36751
CLEC4D	4	0.0028383	0.24086	0.000665	334	4	-41359	0.99716	1.0	1.0	18954	0	-41359
TFEC	4	0.0029822	0.24086	0.000665	335	4	-39433	0.99702	1.0	1.0	18948	0	-39433
DNAJC19	4	0.0029822	0.24086	0.000665	336	4	-39195	0.99702	1.0	1.0	18949	0	-39195
UBE2M	4	0.0029822	0.24086	0.000665	337	4	-41412	0.99702	1.0	1.0	18947	0	-41412
USP24	4	0.0029822	0.24086	0.000665	338	4	-30587	0.99702	1.0	1.0	18951	0	-30587
KDELR2	4	0.0029822	0.24086	0.000665	339	4	-41435	0.99702	1.0	1.0	18953	0	-41435
OR5B21	4	0.0029822	0.24086	0.000665	340	4	-42007	0.99702	1.0	1.0	18950	0	-42007
SLC35E1	4	0.0031255	0.24086	0.000665	341	3	-33234	0.6944	0.63312	0.914885	13198	0	-33234
MRPL39	4	0.0031255	0.24086	0.000665	342	4	-30374	0.99002	0.99999	1.0	18706	0	-30374
HNRNPCL4	4	0.0031255	0.24086	0.000665	343	3	-30231	0.25744	0.27145	0.692063	7112	1	-30231
HPGDS	4	0.0031255	0.24086	0.000665	344	3	-22246	0.84347	0.86993	1.0	16106	0	-22246
ANP32A	4	0.0031255	0.24086	0.000665	345	3	-24891	0.3589	0.29921	0.693524	8219	1	-24891
PPP1R3D	4	0.0031255	0.24086	0.000665	346	3	-20707	0.93786	0.98474	1.0	17804	0	-20707
C9orf50	4	0.0031255	0.24086	0.000665	347	3	-31545	0.61047	0.49708	0.817628	11616	1	-31545
NPAT	4	0.0031255	0.24086	0.000665	348	3	-26388	0.88026	0.92457	1.0	16796	0	-26388
PGLS	4	0.0031474	0.24086	0.000665	349	4	-34141	0.99685	1.0	1.0	18940	0	-34141
KYNU	4	0.0031474	0.24086	0.000665	350	4	-33344	0.99685	1.0	1.0	18937	0	-33344
OXSR1	4	0.0031474	0.24086	0.000665	351	4	-33621	0.99685	1.0	1.0	18939	0	-33621
F8A2	4	0.0031474	0.24086	0.000665	352	4	-43332	0.99685	1.0	1.0	18941	0	-43332
KRTAP10-7	4	0.0031474	0.24086	0.000665	353	4	-38839	0.99685	1.0	1.0	18942	0	-38839
DHX40	4	0.0031474	0.24086	0.000665	354	4	-41044	0.99685	1.0	1.0	18944	0	-41044
ANKRD32	4	0.0031474	0.24086	0.000665	355	4	-42444	0.99685	1.0	1.0	18946	0	-42444
TRHR	4	0.0031474	0.24086	0.000665	356	4	-40831	0.99685	1.0	1.0	18943	0	-40831
EIF4ENIF1	4	0.003225	0.24086	0.000665	357	4	-19098	0.96629	0.99879	1.0	18250	0	-19098
ATP5A1	4	0.003225	0.24086	0.000665	358	2	-10234	0.23026	0.23925	0.692063	6508	1	-10234
PRR4	4	0.003225	0.24086	0.000665	359	4	-36048	0.99179	1.0	1.0	18761	0	-36048
FGFR4	4	0.003225	0.24086	0.000665	360	2	-10048	0.89301	0.94043	1.0	17017	0	-10048
LOC101928436	4	0.003225	0.24086	0.000665	361	2	-0.1236	0.11616	0.10619	0.514136	3871	2	-0.1236
SLC10A1	4	0.003225	0.24086	0.000665	362	2	-0.86338	0.19077	0.17528	0.591552	5640	1	-0.86338
REST	4	0.003225	0.24086	0.000665	363	2	0.41058	0.17659	0.16304	0.579908	5301	2	0.41058
MYBL2	4	0.003225	0.24086	0.000665	364	2	-10034	0.74917	0.71421	0.950193	14311	0	-10034
CACFD1	4	0.003225	0.24086	0.000665	365	2	-0.52242	0.64972	0.57229	0.884933	12312	1	-0.52242
RBMY1A1	4	0.003225	0.24086	0.000665	366	3	-23129	0.93133	0.97951	1.0	17679	0	-23129
LSM4	4	0.003225	0.24086	0.000665	367	4	-34308	0.98958	0.99999	1.0	18698	0	-34308
SUV420H1	4	0.003225	0.24086	0.000665	368	4	-32589	0.99584	1.0	1.0	18902	0	-32589
GMNN	4	0.003225	0.24086	0.000665	369	3	-16055	0.6843	0.62165	0.913085	12982	0	-16055
CMPK1	4	0.003225	0.24086	0.000665	370	3	-17028	0.12927	0.12011	0.53667	4186	1	-17028
B3GNT3	4	0.003225	0.24086	0.000665	371	4	-35696	0.98848	0.99999	1.0	18661	0	-35696
GPSM2	4	0.003225	0.24086	0.000665	372	3	-22595	0.046157	0.065455	0.514136	2148	1	-22595
GPR132	4	0.003225	0.24086	0.000665	373	2	-0.10502	0.050511	0.068462	0.514136	2287	2	-0.10502
APOA1	4	0.00332	0.24086	0.000665	374	4	-41734	0.99668	1.0	1.0	18934	0	-41734
PDZD7	4	0.00332	0.24086	0.000665	375	4	-39012	0.99668	1.0	1.0	18935	0	-39012
TRIM42	4	0.00332	0.24086	0.000665	376	4	-37654	0.99668	1.0	1.0	18936	0	-37654
PLEKHA3	4	0.0034852	0.24086	0.000665	377	4	-44584	0.99651	1.0	1.0	18933	0	-44584
ARHGEF4	4	0.0034852	0.24086	0.000665	378	4	-45043	0.99651	1.0	1.0	18930	0	-45043
GGT6	4	0.0034852	0.24086	0.000665	379	4	-41325	0.99651	1.0	1.0	18931	0	-41325
CD3G	4	0.0034852	0.24086	0.000665	380	4	-42402	0.99651	1.0	1.0	18929	0	-42402
SPARC	4	0.0034852	0.24086	0.000665	381	4	-41266	0.99651	1.0	1.0	18932	0	-41266
GFPT1	4	0.0034852	0.24086	0.000665	382	4	-39703	0.99651	1.0	1.0	18928	0	-39703
TMEM258	4	0.0035059	0.24086	0.000665	383	4	-35981	0.99372	1.0	1.0	18839	0	-35981
DYRK3	4	0.0035059	0.24086	0.000665	384	3	-2883	0.64067	0.56234	0.879138	12142	1	-2883
NOM1	4	0.0035059	0.24086	0.000665	385	3	-33768	0.74722	0.71264	0.950193	14274	0	-33768
ITGB6	4	0.0035059	0.24086	0.000665	386	3	-24063	0.81873	0.83726	1.0	15661	0	-24063
HSPB1	4	0.003585	0.24086	0.000665	387	2	-0.024038	0.26976	0.2734	0.692063	7223	1	-0.024038
PP2D1	4	0.003585	0.24086	0.000665	388	2	-0.11334	0.38929	0.31895	0.710033	8561	1	-0.11334
ARL9	4	0.003585	0.24086	0.000665	389	4	-43616	0.99155	1.0	1.0	18758	0	-43616
SFXN3	4	0.003585	0.24086	0.000665	390	2	0.29851	0.13501	0.12416	0.547103	4328	2	0.29851
IRF1	4	0.003585	0.24086	0.000665	391	2	0.35304	0.75109	0.71576	0.950193	14352	0	0.35304
OR52L1	4	0.003585	0.24086	0.000665	392	2	0.10455	0.25197	0.26501	0.692063	7006	2	0.10455
DMKN	4	0.003585	0.24086	0.000665	393	2	0.32329	0.69525	0.63312	0.914885	13220	0	0.32329
TBCA	4	0.003585	0.24086	0.000665	394	3	-29315	0.87115	0.91373	1.0	16624	0	-29315
ZNF843	4	0.003585	0.24086	0.000665	395	3	-25882	0.36261	0.3032	0.700309	8258	1	-25882
TMEM203	4	0.003585	0.24086	0.000665	396	3	-27313	0.80523	0.81359	1.0	15401	0	-27313
SCNM1	4	0.003585	0.24086	0.000665	397	3	-30881	0.89407	0.94163	1.0	17044	0	-30881
C9orf142	4	0.003585	0.24086	0.000665	398	3	-24944	0.4015	0.3249	0.713444	8701	1	-24944
FBXL4	4	0.003585	0.24086	0.000665	399	3	-29636	0.78695	0.77856	0.989698	15037	0	-29636
EIF3L	4	0.003585	0.24086	0.000665	400	2	-0.67504	0.62487	0.53669	0.864415	11865	1	-0.67504
MRPL18	4	0.003585	0.24086	0.000665	401	1	1756	0.03856	0.049736	0.514136	1842	3	1756
ADH7	4	0.003585	0.24086	0.000665	402	4	-27868	0.94832	0.99146	1.0	17962	0	-27868
RPL39L	4	0.003585	0.24086	0.000665	403	2	-0.43567	0.44189	0.35645	0.738265	9162	1	-0.43567
SOAT1	4	0.003585	0.24086	0.000665	404	3	-15083	0.73174	0.67289	0.919302	13974	0	-15083
UBA52	4	0.003585	0.24086	0.000665	405	2	-0.0067091	0.67801	0.60796	0.899677	12864	1	-0.0067091
MAP1B	4	0.003585	0.24086	0.000665	406	4	-25142	0.9509	0.99331	1.0	17999	0	-25142
TSC22D2	4	0.003585	0.24086	0.000665	407	3	-30881	0.45523	0.3664	0.738265	9353	1	-30881
RAD51	4	0.003585	0.24086	0.000665	408	3	-19535	0.42925	0.34057	0.720216	9018	1	-19535
KCNA5	4	0.003585	0.24086	0.000665	409	3	-12058	0.88158	0.92795	1.0	16817	0	-12058
ESM1	4	0.003585	0.24086	0.000665	410	1	33572	0.0038674	0.0033847	0.182449	309	2	33572
OGT	4	0.003585	0.24086	0.000665	411	1	15583	0.1244	0.112	0.520651	4070	2	15583
NDST4	4	0.003585	0.24086	0.000665	412	3	-10983	0.93073	0.97862	1.0	17665	0	-10983
F8A3	4	0.003585	0.24086	0.000665	413	3	-26056	0.51467	0.39819	0.745076	10144	1	-26056
ZNF575	4	0.003585	0.24086	0.000665	414	2	-0.63873	0.10245	0.10212	0.514136	3558	1	-0.63873
ZBTB7A	4	0.003585	0.24086	0.000665	415	2	-0.28519	0.77075	0.74563	0.96615	14738	0	-0.28519
DAZL	4	0.003585	0.24086	0.000665	416	1	14118	0.20419	0.19521	0.628709	5929	2	14118
KIF27	4	0.003585	0.24086	0.000665	417	3	-21058	0.58497	0.46938	0.797309	11213	1	-21058
KRT78	4	0.003585	0.24086	0.000665	418	2	0.083461	0.090889	0.096794	0.514136	3265	1	0.083461
TAPBPL	4	0.003585	0.24086	0.000665	419	1	0.84481	0.51759	0.40014	0.745076	10187	1	0.84481
PKIB	4	0.003585	0.24086	0.000665	420	3	-16808	0.93533	0.98255	1.0	17759	0	-16808
PPP1R3C	4	0.003585	0.24086	0.000665	421	3	-29842	0.89227	0.93994	1.0	17003	0	-29842
OBP2A	4	0.003585	0.24086	0.000665	422	2	-0.12705	0.60757	0.4951	0.817261	11569	1	-0.12705
KTN1	4	0.003585	0.24086	0.000665	423	3	-23132	0.50654	0.39022	0.74264	10032	1	-23132
CD81	4	0.003585	0.24086	0.000665	424	2	-0.28286	0.68762	0.62554	0.914885	13053	0	-0.28286
MFSD3	4	0.003585	0.24086	0.000665	425	3	-2287	0.22901	0.23594	0.692063	6480	1	-2287
WBSCR17	4	0.003585	0.24086	0.000665	426	2	0.10953	0.24175	0.25429	0.692063	6767	2	0.10953
FBF1	4	0.003585	0.24086	0.000665	427	1	0.034591	0.78294	0.77461	0.988237	14964	0	0.034591
EIF3J	4	0.003585	0.24086	0.000665	428	1	20512	0.030088	0.029928	0.374832	1498	3	20512
ADAM17	4	0.003585	0.24086	0.000665	429	3	-25334	0.48714	0.37831	0.738265	9774	1	-25334
HIST1H1C	4	0.003585	0.24086	0.000665	430	3	-25142	0.81916	0.83726	1.0	15672	0	-25142
OS9	4	0.003585	0.24086	0.000665	431	3	-20707	0.76225	0.731	0.95627	14588	0	-20707
DOPEY2	4	0.003585	0.24086	0.000665	432	3	-32017	0.61057	0.49708	0.817628	11617	1	-32017
PIFO	4	0.003585	0.24086	0.000665	433	2	0.31357	0.11975	0.10802	0.514136	3958	2	0.31357
FUT6	4	0.003585	0.24086	0.000665	434	3	-32312	0.58817	0.47135	0.799425	11260	1	-32312
CACNB3	4	0.003585	0.24086	0.000665	435	3	-22021	0.59391	0.47531	0.799425	11354	1	-22021
TMEM98	4	0.003585	0.24086	0.000665	436	3	-24741	0.20591	0.20344	0.650282	5964	1	-24741
SPRR3	4	0.003585	0.24086	0.000665	437	4	-18414	0.96429	0.99833	1.0	18211	0	-18414
GRIPAP1	4	0.003585	0.24086	0.000665	438	2	-0.30647	0.5034	0.39022	0.74264	9993	1	-0.30647
PSORS1C2	4	0.003585	0.24086	0.000665	439	3	-21394	0.73417	0.67465	0.919302	14022	0	-21394
CXorf49	4	0.003585	0.24086	0.000665	440	3	-0.91187	0.41449	0.33663	0.719007	8845	1	-0.91187
BRWD3	4	0.003585	0.24086	0.000665	441	4	-43294	0.98081	0.99995	1.0	18476	0	-43294
VSX2	4	0.003585	0.24086	0.000665	442	2	0.2792	0.15599	0.14064	0.556148	4800	2	0.2792
SPIRE2	4	0.003585	0.24086	0.000665	443	3	-25142	0.45523	0.3664	0.738265	9349	1	-25142
ALDH7A1	4	0.003585	0.24086	0.000665	444	3	-26712	0.87872	0.92339	1.0	16768	0	-26712
TAGLN	4	0.003585	0.24086	0.000665	445	3	-25521	0.58985	0.47332	0.799425	11289	1	-25521
SDF4	4	0.003585	0.24086	0.000665	446	1	0.29946	0.63601	0.55446	0.878447	12063	1	0.29946
TMEM82	4	0.003585	0.24086	0.000665	447	3	-30042	0.57587	0.46144	0.791716	11070	1	-30042
ASTN2	4	0.003585	0.24086	0.000665	448	4	-23424	0.9765	0.99987	1.0	18399	0	-23424
SP140	4	0.003585	0.24086	0.000665	449	2	0.49255	0.11538	0.10619	0.514136	3853	2	0.49255
EXOSC10	4	0.003585	0.24086	0.000665	450	1	15687	0.044179	0.064456	0.514136	2081	3	15687
HIST2H3C	4	0.003585	0.24086	0.000665	451	1	11826	0.3296	0.28922	0.692063	7873	1	11826
STK11	4	0.003585	0.24086	0.000665	452	3	-24095	0.59469	0.47531	0.799425	11364	1	-24095
GRIK5	4	0.003585	0.24086	0.000665	453	3	-23866	0.81267	0.82466	1.0	15542	0	-23866
ZPBP	4	0.003585	0.24086	0.000665	454	3	-0.98948	0.81159	0.82356	1.0	15522	0	-0.98948
PCDHGA7	4	0.003585	0.24086	0.000665	455	2	0.0017776	0.38732	0.31895	0.710033	8543	1	0.0017776
RPSA	4	0.003585	0.24086	0.000665	456	3	-26712	0.015865	0.019309	0.373704	883	1	-26712
ITGA11	4	0.003585	0.24086	0.000665	457	4	-43205	0.97715	0.99989	1.0	18412	0	-43205
UBXN2A	4	0.003585	0.24086	0.000665	458	3	-18114	0.92214	0.97289	1.0	17521	0	-18114
PDE6G	4	0.003585	0.24086	0.000665	459	2	-0.42704	0.17199	0.1596	0.579908	5184	1	-0.42704
HUNK	4	0.003585	0.24086	0.000665	460	3	-20707	0.53645	0.41595	0.757522	10469	1	-20707
MYCBPAP	4	0.003585	0.24086	0.000665	461	3	-21058	0.88468	0.9312	1.0	16880	0	-21058
NUFIP2	4	0.003585	0.24086	0.000665	462	3	-0.91187	0.15582	0.14064	0.556148	4797	1	-0.91187
CTNNBIP1	4	0.003585	0.24086	0.000665	463	2	-0.29337	0.70934	0.65163	0.918738	13495	0	-0.29337
IKZF1	4	0.003585	0.24086	0.000665	464	2	-0.81639	0.039459	0.053346	0.514136	1885	1	-0.81639
ELMO3	4	0.003585	0.24086	0.000665	465	2	-0.54545	0.42279	0.33865	0.719007	8939	1	-0.54545
TCEANC	4	0.003585	0.24086	0.000665	466	3	-1096	0.6653	0.59216	0.896533	12613	1	-1096
RBMY1D	4	0.003585	0.24086	0.000665	467	4	-28715	0.98406	0.99998	1.0	18536	0	-28715
SNCG	4	0.003585	0.24086	0.000665	468	4	-29739	0.99584	1.0	1.0	18900	0	-29739
C2CD4A	4	0.003585	0.24086	0.000665	469	2	0.14167	0.22977	0.23711	0.692063	6497	2	0.14167
ARHGEF26	4	0.003585	0.24086	0.000665	470	2	-0.070707	0.70375	0.64623	0.918738	13387	0	-0.070707
LRRC71	4	0.003585	0.24086	0.000665	471	2	-0.79469	0.92226	0.97316	1.0	17522	0	-0.79469
SNX18	4	0.003585	0.24086	0.000665	472	2	-0.53108	0.35264	0.29525	0.692063	8154	1	-0.53108
SLC25A11	4	0.003585	0.24086	0.000665	473	3	-0.82521	0.0068264	0.0047438	0.191822	450	1	-0.82521
CTSW	4	0.003585	0.24086	0.000665	474	2	-0.37115	0.076741	0.085643	0.514136	2917	1	-0.37115
KIF11	4	0.003585	0.24086	0.000665	475	2	-0.26465	0.61833	0.51487	0.835816	11752	1	-0.26465
C5orf45	4	0.003585	0.24086	0.000665	476	3	-24741	0.59046	0.47332	0.799425	11302	1	-24741
TOP3B	4	0.003585	0.24086	0.000665	477	3	-11714	0.55037	0.43382	0.768953	10684	1	-11714
C12orf77	4	0.003585	0.24086	0.000665	478	4	-17308	0.9664	0.99882	1.0	18251	0	-17308
CSF1R	4	0.003585	0.24086	0.000665	479	2	0.34506	0.079807	0.086093	0.514136	2989	2	0.34506
OR12D2	4	0.003585	0.24086	0.000665	480	3	-22034	0.90797	0.95922	1.0	17266	0	-22034
C12orf66	4	0.003585	0.24086	0.000665	481	1	1372	0.07919	0.086093	0.514136	2980	2	1372
IQCF6	4	0.003585	0.24086	0.000665	482	1	12085	0.41459	0.33663	0.719007	8848	1	12085
ASIC3	4	0.003585	0.24086	0.000665	483	3	-27019	0.41153	0.33465	0.719007	8813	1	-27019
HIST2H2AC	4	0.003585	0.24086	0.000665	484	2	0.13813	0.11198	0.1056	0.514136	3774	2	0.13813
KCNS2	4	0.003585	0.24086	0.000665	485	3	-27596	0.65054	0.57229	0.884933	12327	1	-27596
DNAJC22	4	0.003585	0.24086	0.000665	486	4	-30333	0.9502	0.99292	1.0	17990	0	-30333
SIM2	4	0.003585	0.24086	0.000665	487	1	0.69556	0.79081	0.78369	0.990488	15110	0	0.69556
SHC2	4	0.003585	0.24086	0.000665	488	3	-30881	0.87065	0.91245	1.0	16619	0	-30881
CXorf40A	4	0.003585	0.24086	0.000665	489	1	17229	0.016993	0.019711	0.373704	934	2	17229
OSBPL5	4	0.003585	0.24086	0.000665	490	2	0.23917	0.67228	0.60202	0.899677	12751	1	0.23917
SLC7A4	4	0.003585	0.24086	0.000665	491	2	-0.11334	0.22856	0.23594	0.692063	6473	1	-0.11334
TNFAIP8L2-SCNM1	4	0.003585	0.24086	0.000665	492	2	-0.093491	0.29206	0.27934	0.692063	7466	1	-0.093491
RNH1	4	0.003585	0.24086	0.000665	493	2	-0.79818	0.0085211	0.0053789	0.191822	535	1	-0.79818
TMLHE	4	0.003585	0.24086	0.000665	494	3	-12676	0.12074	0.10864	0.514136	3984	1	-12676
MFSD1	4	0.003585	0.24086	0.000665	495	2	0.15252	0.39283	0.32094	0.710033	8602	1	0.15252
MLXIPL	4	0.003585	0.24086	0.000665	496	2	-0.17955	0.28313	0.27738	0.692063	7377	1	-0.17955
POLR2D	4	0.003585	0.24086	0.000665	497	3	-23132	0.59314	0.47531	0.799425	11339	1	-23132
ZFHX3	4	0.003585	0.24086	0.000665	498	3	-26553	0.11224	0.1056	0.514136	3780	1	-26553
HINT1	4	0.003585	0.24086	0.000665	499	4	-42628	0.98366	0.99997	1.0	18529	0	-42628
NPC1	4	0.0036461	0.24086	0.000665	500	4	-4334	0.99635	1.0	1.0	18921	0	-4334
CALML5	4	0.0036461	0.24086	0.000665	501	4	-39612	0.99635	1.0	1.0	18927	0	-39612
OR2H1	4	0.0036461	0.24086	0.000665	502	4	-40524	0.99635	1.0	1.0	18926	0	-40524
MTA1	4	0.0036461	0.24086	0.000665	503	4	-28563	0.99635	1.0	1.0	18924	0	-28563
OSCAR	4	0.0036461	0.24086	0.000665	504	4	-35784	0.99635	1.0	1.0	18919	0	-35784
RUNX3	4	0.0036461	0.24086	0.000665	505	4	-41171	0.99635	1.0	1.0	18920	0	-41171
WDR25	4	0.0036461	0.24086	0.000665	506	4	-42914	0.99635	1.0	1.0	18922	0	-42914
CEP192	4	0.0036461	0.24086	0.000665	507	4	-41145	0.99635	1.0	1.0	18923	0	-41145
MAP3K6	4	0.0038145	0.24086	0.000665	508	4	-42391	0.99619	1.0	1.0	18914	0	-42391
C9orf9	4	0.0038145	0.24086	0.000665	509	4	-40756	0.99619	1.0	1.0	18917	0	-40756
HOMER3	4	0.0038145	0.24086	0.000665	510	4	-23633	0.99619	1.0	1.0	18915	0	-23633
ZNF571	4	0.0038145	0.24086	0.000665	511	4	-35372	0.99619	1.0	1.0	18912	0	-35372
SPIN4	4	0.0038145	0.24086	0.000665	512	4	-3698	0.99619	1.0	1.0	18913	0	-3698
CLIC6	4	0.0038145	0.24086	0.000665	513	4	-43433	0.99619	1.0	1.0	18916	0	-43433
CCDC9	4	0.0038145	0.24086	0.000665	514	4	-44195	0.99619	1.0	1.0	18918	0	-44195
MFRP	4	0.0039861	0.24086	0.000665	515	4	-38152	0.99601	1.0	1.0	18907	0	-38152
BTBD7	4	0.0039861	0.24086	0.000665	516	4	-39406	0.99601	1.0	1.0	18906	0	-39406
HBQ1	4	0.0039861	0.24086	0.000665	517	4	-36628	0.99601	1.0	1.0	18911	0	-36628
FBN1	4	0.0039861	0.24086	0.000665	518	4	-42696	0.99601	1.0	1.0	18908	0	-42696
OR13J1	4	0.0039861	0.24086	0.000665	519	4	-33545	0.99601	1.0	1.0	18909	0	-33545
C4A	4	0.0039861	0.24086	0.000665	520	4	-37969	0.99601	1.0	1.0	18910	0	-37969
SMTNL1	4	0.0040829	0.24086	0.000665	521	3	-24063	0.025197	0.025872	0.373704	1301	1	-24063
ZEB2	4	0.0040829	0.24086	0.000665	522	4	-23032	0.96581	0.99871	1.0	18242	0	-23032
CCDC6	4	0.0040829	0.24086	0.000665	523	3	-16153	0.91675	0.96802	1.0	17417	0	-16153
MCTP1	4	0.0040829	0.24086	0.000665	524	3	-24063	0.088265	0.093867	0.514136	3196	1	-24063
LMNTD2	4	0.0040829	0.24086	0.000665	525	4	-22455	0.95034	0.99301	1.0	17992	0	-22455
PHB2	4	0.0040829	0.24086	0.000665	526	4	-23566	0.97216	0.99963	1.0	18336	0	-23566
KRTAP17-1	4	0.0040829	0.24086	0.000665	527	4	-23032	0.98168	0.99996	1.0	18494	0	-23032
RPP25	4	0.0040829	0.24086	0.000665	528	2	-0.32106	0.10661	0.10504	0.514136	3644	2	-0.32106
MTCP1	4	0.0040829	0.24086	0.000665	529	3	-16153	0.69016	0.62936	0.914885	13101	0	-16153
ADSL	4	0.0040829	0.24086	0.000665	530	2	-0.25833	0.24983	0.26373	0.692063	6965	1	-0.25833
NDUFB5	4	0.0040829	0.24086	0.000665	531	3	-24528	0.57144	0.45143	0.783395	11004	1	-24528
MAP4	4	0.0040829	0.24086	0.000665	532	3	-22455	0.76467	0.73546	0.960271	14635	0	-22455
ANK2	4	0.0040829	0.24086	0.000665	533	3	-24528	0.6006	0.49108	0.815075	11447	1	-24528
LEO1	4	0.0040829	0.24086	0.000665	534	3	-0.81574	0.48786	0.37831	0.738265	9786	1	-0.81574
ZNF565	4	0.0040829	0.24086	0.000665	535	3	-21829	0.43101	0.34262	0.723343	9044	1	-21829
MGAT4B	4	0.0040829	0.24086	0.000665	536	3	-23566	0.88957	0.93643	1.0	16961	0	-23566
HDAC7	4	0.0040829	0.24086	0.000665	537	3	-22455	0.61206	0.49904	0.819166	11644	1	-22455
TAB1	4	0.0040829	0.24086	0.000665	538	2	0.026681	0.15509	0.14064	0.556148	4780	2	0.026681
FNBP1L	4	0.0040829	0.24086	0.000665	539	3	-21829	0.86186	0.9009	1.0	16456	0	-21829
TOP2A	4	0.0040829	0.24086	0.000665	540	3	-18574	0.8404	0.86326	1.0	16054	0	-18574
DNAJB12	4	0.0040829	0.24086	0.000665	541	2	0.12623	0.080486	0.086094	0.514136	3004	2	0.12623
TCTN3	4	0.0041551	0.24086	0.000665	542	4	-32076	0.99584	1.0	1.0	18901	0	-32076
CCR3	4	0.0041551	0.24086	0.000665	543	4	-40669	0.99584	1.0	1.0	18904	0	-40669
EPGN	4	0.0041551	0.24086	0.000665	544	4	-42377	0.99584	1.0	1.0	18905	0	-42377
MIA2	4	0.0041551	0.24086	0.000665	545	4	-42377	0.99584	1.0	1.0	18898	0	-42377
KPNA6	4	0.0041551	0.24086	0.000665	546	4	-44381	0.99584	1.0	1.0	18903	0	-44381
ZNF804A	4	0.0043329	0.24604	0.000665	547	4	-36543	0.99567	1.0	1.0	18892	0	-36543
KIF1BP	4	0.0043329	0.24604	0.000665	548	4	-44949	0.99567	1.0	1.0	18894	0	-44949
HEPACAM2	4	0.0043329	0.24604	0.000665	549	4	-38933	0.99567	1.0	1.0	18893	0	-38933
MANF	4	0.0043329	0.24604	0.000665	550	4	-35739	0.99567	1.0	1.0	18896	0	-35739
PTGES	4	0.0043329	0.24604	0.000665	551	4	-43118	0.99567	1.0	1.0	18897	0	-43118
ANKRD34A	4	0.0043329	0.24604	0.000665	552	4	-39167	0.99567	1.0	1.0	18891	0	-39167
RPS7	4	0.0044381	0.26675	0.000665	553	4	-22187	0.97939	0.99994	1.0	18447	0	-22187
KPTN	4	0.0044381	0.26675	0.000665	554	3	-14112	0.31149	0.2852	0.692063	7675	1	-14112
RPAIN	4	0.0044381	0.26675	0.000665	555	3	-0.41323	0.56951	0.45143	0.783395	10979	1	-0.41323
HSP90AA1	4	0.0044381	0.26675	0.000665	556	4	-26179	0.97948	0.99994	1.0	18451	0	-26179
SF3B4	4	0.0044381	0.26675	0.000665	557	3	-16728	0.85427	0.89074	1.0	16321	0	-16728
PHOX2B	4	0.0044381	0.26675	0.000665	558	3	-1315	0.63978	0.56234	0.879138	12127	1	-1315
PDGFRA	4	0.0044381	0.26675	0.000665	559	3	-14961	0.2538	0.26624	0.692063	7040	1	-14961
JUN	4	0.0044381	0.26675	0.000665	560	3	-0.41323	0.59243	0.47531	0.799425	11329	1	-0.41323
RPAP1	4	0.0044381	0.26675	0.000665	561	4	-33234	0.98672	0.99998	1.0	18617	0	-33234
TIMM44	4	0.0044381	0.26675	0.000665	562	3	-17611	0.77131	0.74563	0.96615	14752	0	-17611
NDUFB8	4	0.0044381	0.26675	0.000665	563	3	-17611	0.6128	0.50495	0.827013	11653	1	-17611
C11orf31	4	0.0044381	0.26675	0.000665	564	4	-0.58382	0.96367	0.99823	1.0	18204	0	-0.58382
OR2M2	4	0.0044381	0.26675	0.000665	565	4	-22024	0.98417	0.99998	1.0	18539	0	-22024
ZNRF2	4	0.0044381	0.26675	0.000665	566	3	-16072	0.87818	0.92279	1.0	16756	0	-16072
TRPM7	4	0.0044381	0.26675	0.000665	567	4	-31878	0.98168	0.99996	1.0	18492	0	-31878
OSBPL9	4	0.0044381	0.26675	0.000665	568	3	-12039	0.9178	0.96924	1.0	17435	0	-12039
IGFBP4	4	0.0044381	0.26675	0.000665	569	4	-27398	0.98733	0.99999	1.0	18626	0	-27398
CDK9	4	0.0044381	0.26675	0.000665	570	3	-0.41323	0.13829	0.12888	0.555184	4394	1	-0.41323
DCDC2B	4	0.0044381	0.26675	0.000665	571	3	-12616	0.59998	0.48913	0.815075	11439	1	-12616
KCNA10	4	0.0044381	0.26675	0.000665	572	3	-0.41323	0.73516	0.67805	0.922623	14042	0	-0.41323
VENTX	4	0.0044381	0.26675	0.000665	573	3	-17884	0.90605	0.95721	1.0	17233	0	-17884
HGC6.3	4	0.0044381	0.26675	0.000665	574	4	-10726	0.98892	0.99999	1.0	18680	0	-10726
PAG1	4	0.0044381	0.26675	0.000665	575	4	-3108	0.99048	1.0	1.0	18720	0	-3108
OTUD7A	4	0.0044381	0.26675	0.000665	576	4	-29708	0.99048	1.0	1.0	18719	0	-29708
UBFD1	4	0.0044381	0.26675	0.000665	577	3	-0.99668	0.64473	0.56234	0.879138	12214	1	-0.99668
PC	4	0.0044381	0.26675	0.000665	578	3	-10726	0.94103	0.98674	1.0	17846	0	-10726
POLD2	4	0.0044381	0.26675	0.000665	579	3	-12039	0.46718	0.37637	0.738265	9500	1	-12039
GRM4	4	0.0044381	0.26675	0.000665	580	3	-0.99668	0.68481	0.62165	0.913085	12994	0	-0.99668
IL1RN	4	0.0044381	0.26675	0.000665	581	3	-14961	0.89917	0.94649	1.0	17134	0	-14961
WDR75	4	0.0044381	0.26675	0.000665	582	3	-1315	0.88721	0.93382	1.0	16923	0	-1315
ERH	4	0.0044381	0.26675	0.000665	583	4	-3339	0.97571	0.99987	1.0	18388	0	-3339
CASC1	4	0.0044381	0.26675	0.000665	584	4	-31878	0.99109	1.0	1.0	18735	0	-31878
DERL2	4	0.0044381	0.26675	0.000665	585	3	-12039	0.041512	0.058395	0.514136	1967	1	-12039
C1QL2	4	0.0044381	0.26675	0.000665	586	3	-16728	0.060779	0.071224	0.514136	2539	1	-16728
SF3A1	4	0.0044381	0.26675	0.000665	587	3	-1315	0.46289	0.37637	0.738265	9443	1	-1315
SDAD1	4	0.0044381	0.26675	0.000665	588	3	-1315	0.66877	0.59608	0.896606	12676	1	-1315
XPO1	4	0.0044381	0.26675	0.000665	589	3	-14549	0.45249	0.36444	0.738265	9307	1	-14549
MDM1	4	0.0044381	0.26675	0.000665	590	3	-1933	0.2699	0.2734	0.692063	7225	1	-1933
SECISBP2	4	0.0044381	0.26675	0.000665	591	4	-26139	0.98825	0.99999	1.0	18655	0	-26139
TMEM178A	4	0.0044381	0.26675	0.000665	592	3	-17611	0.27225	0.2734	0.692063	7253	1	-17611
LSM1	4	0.0044381	0.26675	0.000665	593	4	-15728	0.95378	0.99461	1.0	18048	0	-15728
WASH1	4	0.0044381	0.26675	0.000665	594	3	-16407	0.72588	0.66599	0.918738	13852	0	-16407
MAFA	4	0.0044381	0.26675	0.000665	595	3	-1572	0.15231	0.14064	0.556148	4711	1	-1572
FAM101A	4	0.0044381	0.26675	0.000665	596	3	-14549	0.18385	0.16811	0.586107	5475	1	-14549
BFSP1	4	0.0044381	0.26675	0.000665	597	3	-12039	0.7857	0.77724	0.988945	15011	0	-12039
TTK	4	0.0044381	0.26675	0.000665	598	3	-11412	0.50248	0.39022	0.74264	9981	1	-11412
NPPB	4	0.0044381	0.26675	0.000665	599	3	-1572	0.9283	0.97627	1.0	17624	0	-1572
TEPP	4	0.0044381	0.26675	0.000665	600	4	-18715	0.96169	0.9978	1.0	18173	0	-18715
EIF3G	4	0.0044381	0.26675	0.000665	601	3	-19546	0.92649	0.97526	1.0	17594	0	-19546
MRPL33	4	0.0044381	0.26675	0.000665	602	4	-1825	0.9569	0.99611	1.0	18099	0	-1825
CYYR1	4	0.0044381	0.26675	0.000665	603	3	-10726	0.49136	0.38329	0.74264	9830	1	-10726
KCNIP1	4	0.0044381	0.26675	0.000665	604	3	-1315	0.23587	0.24856	0.692063	6622	1	-1315
MYH11	4	0.0044381	0.26675	0.000665	605	3	-13647	0.93929	0.98574	1.0	17824	0	-13647
MMP25	4	0.0045217	0.28747	0.000665	606	4	-35266	0.99548	1.0	1.0	18887	0	-35266
POLG2	4	0.0045217	0.28747	0.000665	607	4	-36702	0.99548	1.0	1.0	18886	0	-36702
FBXO6	4	0.0045217	0.28747	0.000665	608	4	-36692	0.99548	1.0	1.0	18890	0	-36692
SLN	4	0.0045217	0.28747	0.000665	609	4	-40737	0.99548	1.0	1.0	18889	0	-40737
ANGPTL7	4	0.0045217	0.28747	0.000665	610	4	-40209	0.99548	1.0	1.0	18888	0	-40209
NR1H4	4	0.0045217	0.28747	0.000665	611	4	-41895	0.99548	1.0	1.0	18885	0	-41895
MYL4	4	0.0047236	0.29265	0.000665	612	4	-39729	0.99528	1.0	1.0	18882	0	-39729
CD19	4	0.0047236	0.29265	0.000665	613	4	-37858	0.99528	1.0	1.0	18881	0	-37858
CALD1	4	0.0047236	0.29265	0.000665	614	4	-41192	0.99528	1.0	1.0	18880	0	-41192
ZNF879	4	0.0047236	0.29265	0.000665	615	4	-41463	0.99528	1.0	1.0	18883	0	-41463
MYO5A	4	0.0049326	0.29265	0.000665	616	4	-36919	0.99507	1.0	1.0	18873	0	-36919
C12orf65	4	0.0049326	0.29265	0.000665	617	4	-41993	0.99507	1.0	1.0	18874	0	-41993
C6orf118	4	0.0049326	0.29265	0.000665	618	4	-44855	0.99507	1.0	1.0	18876	0	-44855
CHST10	4	0.0049326	0.29265	0.000665	619	4	-4334	0.99507	1.0	1.0	18875	0	-4334
C19orf33	4	0.0049326	0.29265	0.000665	620	4	-39951	0.99507	1.0	1.0	18878	0	-39951
ACOT7	4	0.0049326	0.29265	0.000665	621	4	-39322	0.99507	1.0	1.0	18879	0	-39322
FAM217B	4	0.0049326	0.29265	0.000665	622	4	-36933	0.99507	1.0	1.0	18877	0	-36933
LCE2A	4	0.005055	0.29265	0.000665	623	3	-22241	0.64161	0.56234	0.879138	12162	1	-22241
DCTN6	4	0.005055	0.29265	0.000665	624	2	0.3239	0.01418	0.015312	0.356286	803	2	0.3239
H2AFB1	4	0.005055	0.29265	0.000665	625	3	-23978	0.79829	0.80195	1.0	15265	0	-23978
SLC25A28	4	0.005055	0.29265	0.000665	626	3	-21554	0.37123	0.30913	0.704374	8362	1	-21554
C20orf195	4	0.005055	0.29265	0.000665	627	3	-2494	0.073062	0.080061	0.514136	2828	1	-2494
XPR1	4	0.005055	0.29265	0.000665	628	3	-24475	0.87552	0.91808	1.0	16713	0	-24475
SHISA6	4	0.005055	0.29265	0.000665	629	2	-0.92033	0.12158	0.10864	0.514136	4001	1	-0.92033
FOLH1	4	0.005055	0.29265	0.000665	630	2	-0.41793	0.6875	0.62554	0.914885	13052	0	-0.41793
CPSF7	4	0.005055	0.29265	0.000665	631	3	-25789	0.51936	0.40214	0.745076	10220	1	-25789
GPR18	4	0.005055	0.29265	0.000665	632	3	-0.87327	0.84664	0.87545	1.0	16175	0	-0.87327
RRM1	4	0.005055	0.29265	0.000665	633	2	-0.31789	0.12986	0.12011	0.53667	4204	2	-0.31789
POU2F2	4	0.005055	0.29265	0.000665	634	3	-25789	0.73882	0.68822	0.931487	14109	0	-25789
FAM222A	4	0.005055	0.29265	0.000665	635	3	-16258	0.72091	0.66244	0.918738	13732	0	-16258
DNAJC5B	4	0.005055	0.29265	0.000665	636	2	-0.98978	0.24973	0.26373	0.692063	6964	1	-0.98978
IDH3G	4	0.005055	0.29265	0.000665	637	2	-0.24198	0.35042	0.29525	0.692063	8128	1	-0.24198
MMS22L	4	0.005055	0.29265	0.000665	638	3	-17877	0.6144	0.50693	0.827421	11690	1	-17877
BUB1	4	0.005055	0.29265	0.000665	639	3	-23978	0.22901	0.23594	0.692063	6483	1	-23978
CLIP2	4	0.0051258	0.29265	0.000665	640	4	-38342	0.99487	1.0	1.0	18872	0	-38342
IMPDH1	4	0.0051258	0.29265	0.000665	641	4	-36752	0.99487	1.0	1.0	18868	0	-36752
RPS6KC1	4	0.0051258	0.29265	0.000665	642	4	-43946	0.99487	1.0	1.0	18869	0	-43946
RBSN	4	0.0051258	0.29265	0.000665	643	4	-41428	0.99487	1.0	1.0	18871	0	-41428
CARD9	4	0.0051258	0.29265	0.000665	644	4	-42593	0.99487	1.0	1.0	18870	0	-42593
KIAA0355	4	0.0053174	0.29265	0.000665	645	4	-43005	0.99468	1.0	1.0	18867	0	-43005
NELFE	4	0.0053174	0.29265	0.000665	646	4	-37655	0.99468	1.0	1.0	18865	0	-37655
FOXI2	4	0.0053174	0.29265	0.000665	647	4	-42844	0.99468	1.0	1.0	18866	0	-42844
TP53TG3B	4	0.0055133	0.29265	0.000665	648	4	-39454	0.99449	1.0	1.0	18860	0	-39454
GLRA2	4	0.0055133	0.29265	0.000665	649	4	-40518	0.99449	1.0	1.0	18858	0	-40518
TCTN1	4	0.0055133	0.29265	0.000665	650	4	-45162	0.99449	1.0	1.0	18859	0	-45162
MYEOV2	4	0.0055133	0.29265	0.000665	651	4	-38128	0.99449	1.0	1.0	18857	0	-38128
OR10G8	4	0.0055133	0.29265	0.000665	652	4	-39546	0.99449	1.0	1.0	18864	0	-39546
CT47A11	4	0.0055133	0.29265	0.000665	653	4	-4.29	0.99449	1.0	1.0	18861	0	-4.29
CSGALNACT2	4	0.0055133	0.29265	0.000665	654	4	-42242	0.99449	1.0	1.0	18863	0	-42242
UBE4B	4	0.0055648	0.29265	0.000665	655	4	-35095	0.99131	1.0	1.0	18745	0	-35095
C6orf165	4	0.0055648	0.29265	0.000665	656	3	-26387	0.92799	0.97626	1.0	17618	0	-26387
CADPS	4	0.0055648	0.29265	0.000665	657	4	-35324	0.98494	0.99998	1.0	18570	0	-35324
ZNF202	4	0.0055648	0.29265	0.000665	658	3	-29102	0.01303	0.014756	0.356286	749	1	-29102
MCUR1	4	0.0055648	0.29265	0.000665	659	4	-32527	0.94571	0.99017	1.0	17920	0	-32527
PABPN1	4	0.0055648	0.29265	0.000665	660	3	-17884	0.56869	0.45143	0.783395	10962	1	-17884
DNAJA3	4	0.0055648	0.29265	0.000665	661	3	-26707	0.45022	0.36444	0.738265	9271	1	-26707
GGA2	4	0.0055648	0.29265	0.000665	662	3	-29937	0.8667	0.90779	1.0	16541	0	-29937
SF3A3	4	0.0055648	0.29265	0.000665	663	3	-34528	0.71125	0.65351	0.918738	13532	0	-34528
KLK7	4	0.0055648	0.29265	0.000665	664	4	-36371	0.99247	1.0	1.0	18784	0	-36371
DBP	4	0.0055648	0.29265	0.000665	665	3	-27661	0.86356	0.90509	1.0	16484	0	-27661
HAUS2	4	0.0055648	0.29265	0.000665	666	4	-35095	0.99131	1.0	1.0	18744	0	-35095
APCDD1L	4	0.0055648	0.29265	0.000665	667	3	-30085	0.81678	0.8331	1.0	15627	0	-30085
AARS2	4	0.0055648	0.29265	0.000665	668	3	-25235	0.070009	0.079638	0.514136	2757	1	-25235
DERA	4	0.0055648	0.29265	0.000665	669	4	-34614	0.98938	0.99999	1.0	18693	0	-34614
CD99L2	4	0.0056969	0.29265	0.000665	670	4	-44102	0.9943	1.0	1.0	18855	0	-44102
ZDHHC23	4	0.0056969	0.29265	0.000665	671	4	-3523	0.9943	1.0	1.0	18856	0	-3523
DCHS1	4	0.0056969	0.29265	0.000665	672	4	-43293	0.9943	1.0	1.0	18853	0	-43293
ASTE1	4	0.0056969	0.29265	0.000665	673	4	-40737	0.9943	1.0	1.0	18850	0	-40737
GCOM1	4	0.0056969	0.29265	0.000665	674	4	-42642	0.9943	1.0	1.0	18851	0	-42642
PPA1	4	0.0056969	0.29265	0.000665	675	4	-36381	0.9943	1.0	1.0	18854	0	-36381
TP53TG5	4	0.0056969	0.29265	0.000665	676	4	-39735	0.9943	1.0	1.0	18849	0	-39735
DNAJC15	4	0.0056969	0.29265	0.000665	677	4	-45679	0.9943	1.0	1.0	18852	0	-45679
FLAD1	4	0.0058751	0.29265	0.000665	678	4	-47027	0.99412	1.0	1.0	18848	0	-47027
MFGE8	4	0.0058751	0.29265	0.000665	679	4	-38006	0.99412	1.0	1.0	18844	0	-38006
PAQR5	4	0.0058751	0.29265	0.000665	680	4	-41621	0.99412	1.0	1.0	18845	0	-41621
TWSG1	4	0.0058751	0.29265	0.000665	681	4	-3812	0.99412	1.0	1.0	18846	0	-3812
GNPDA1	4	0.0058751	0.29265	0.000665	682	4	-34615	0.99412	1.0	1.0	18847	0	-34615
EIF1AX	4	0.0060743	0.29265	0.000665	683	4	-46439	0.99393	1.0	1.0	18843	0	-46439
FIGF	4	0.0060743	0.29265	0.000665	684	4	-41268	0.99393	1.0	1.0	18842	0	-41268
TIGAR	4	0.0060743	0.29265	0.000665	685	4	-3799	0.99393	1.0	1.0	18841	0	-3799
TNNI1	4	0.0061468	0.29783	0.000665	686	4	-34801	0.97988	0.99994	1.0	18456	0	-34801
CPNE6	4	0.0061468	0.29783	0.000665	687	3	-34286	0.20254	0.18952	0.612983	5885	1	-34286
ETS1	4	0.0061468	0.29783	0.000665	688	4	-33437	0.99372	1.0	1.0	18835	0	-33437
FAM111A	4	0.0061468	0.29783	0.000665	689	3	-33907	0.66034	0.59012	0.894681	12516	1	-33907
SIRT3	4	0.0061468	0.29783	0.000665	690	3	-32943	0.71913	0.66244	0.918738	13689	0	-32943
ZNF426	4	0.0061468	0.29783	0.000665	691	3	-20155	0.69703	0.63686	0.916828	13257	0	-20155
TUBA3D	4	0.0061468	0.29783	0.000665	692	4	-25235	0.9674	0.99891	1.0	18265	0	-25235
RPL26	4	0.0061468	0.29783	0.000665	693	3	-26551	0.080796	0.086094	0.514136	3009	1	-26551
PIGF	4	0.0061468	0.29783	0.000665	694	4	-3675	0.98869	0.99999	1.0	18675	0	-3675
CYTIP	4	0.0061468	0.29783	0.000665	695	3	-36371	0.56797	0.45143	0.783395	10953	1	-36371
GON4L	4	0.0061468	0.29783	0.000665	696	3	-28772	0.26815	0.2734	0.692063	7210	1	-28772
CAV2	4	0.0061468	0.29783	0.000665	697	4	-35046	0.98892	0.99999	1.0	18678	0	-35046
AURKAIP1	4	0.0061474	0.29783	0.000665	698	3	-2263	0.84304	0.8695	1.0	16099	0	-2263
TGS1	4	0.0061474	0.29783	0.000665	699	3	-24865	0.38768	0.31895	0.710033	8545	1	-24865
ANTXRL	4	0.0061474	0.29783	0.000665	700	3	-26179	0.84089	0.86416	1.0	16062	0	-26179
HJURP	4	0.0061474	0.29783	0.000665	701	3	-25767	0.21336	0.21344	0.660911	6137	1	-25767
SMCO4	4	0.0061474	0.29783	0.000665	702	3	-23257	0.85259	0.88526	1.0	16287	0	-23257
NOL12	4	0.0061474	0.29783	0.000665	703	3	-21944	0.63255	0.5525	0.878408	11992	1	-21944
AQP5	4	0.0061474	0.29783	0.000665	704	3	-24368	0.65548	0.57828	0.889711	12417	1	-24368
MEPCE	4	0.0061474	0.29783	0.000665	705	3	-21185	0.29573	0.27934	0.692063	7508	1	-21185
PCDHB13	4	0.0061474	0.29783	0.000665	706	4	-32287	0.98026	0.99994	1.0	18460	0	-32287
CCDC18	4	0.0061474	0.29783	0.000665	707	3	-19376	0.68634	0.62554	0.914885	13027	0	-19376
LRRC73	4	0.0061474	0.29783	0.000665	708	3	-21185	0.73095	0.67289	0.919302	13957	0	-21185
MSL2	4	0.0061474	0.29783	0.000665	709	3	-21944	0.89415	0.94233	1.0	17045	0	-21944
CDPF1	4	0.0061474	0.29783	0.000665	710	4	-12926	0.95315	0.99429	1.0	18038	0	-12926
C12orf56	4	0.0061474	0.29783	0.000665	711	3	-21185	0.82713	0.84635	1.0	15812	0	-21185
RNF113A	4	0.0061474	0.29783	0.000665	712	3	-2533	0.33483	0.29126	0.692063	7929	1	-2533
NLRP8	4	0.0061474	0.29783	0.000665	713	3	-26569	0.87338	0.91563	1.0	16665	0	-26569
NUP214	4	0.0061474	0.29783	0.000665	714	3	-26569	0.58062	0.46337	0.793446	11149	1	-26569
CHSY3	4	0.0061474	0.29783	0.000665	715	2	-0.83202	0.82121	0.83825	1.0	15709	0	-0.83202
SCT	4	0.0061474	0.29783	0.000665	716	4	-23558	0.97025	0.99942	1.0	18305	0	-23558
KCND3	4	0.0061474	0.29783	0.000665	717	2	-0.81248	0.13949	0.13022	0.555184	4423	1	-0.81248
TMEM247	4	0.0061474	0.29783	0.000665	718	3	-2263	0.1894	0.17528	0.591552	5612	1	-2263
GART	4	0.0061474	0.29783	0.000665	719	3	-18206	0.88242	0.92847	1.0	16834	0	-18206
SLC44A2	4	0.0062838	0.29783	0.000665	720	4	-40044	0.99372	1.0	1.0	18838	0	-40044
CCDC136	4	0.0062838	0.29783	0.000665	721	4	-39284	0.99372	1.0	1.0	18837	0	-39284
MOXD1	4	0.0062838	0.29783	0.000665	722	4	-33971	0.99372	1.0	1.0	18836	0	-33971
ISG15	4	0.0064797	0.29783	0.000665	723	4	-44081	0.99352	1.0	1.0	18832	0	-44081
CCDC88B	4	0.0064797	0.29783	0.000665	724	4	-45691	0.99352	1.0	1.0	18831	0	-45691
ZNF561	4	0.0064797	0.29783	0.000665	725	4	-37357	0.99352	1.0	1.0	18833	0	-37357
IL22RA1	4	0.0064797	0.29783	0.000665	726	4	-37092	0.99352	1.0	1.0	18834	0	-37092
THAP9	4	0.0066862	0.29783	0.000665	727	4	-38854	0.99331	1.0	1.0	18827	0	-38854
RPL10L	4	0.0066862	0.29783	0.000665	728	4	-38585	0.99331	1.0	1.0	18825	0	-38585
POLR2J	4	0.0066862	0.29783	0.000665	729	4	-31346	0.99331	1.0	1.0	18824	0	-31346
CENPP	4	0.0066862	0.29783	0.000665	730	4	-44262	0.99331	1.0	1.0	18829	0	-44262
OBSCN	4	0.0066862	0.29783	0.000665	731	4	-4391	0.99331	1.0	1.0	18818	0	-4391
RANBP2	4	0.0066862	0.29783	0.000665	732	4	-39055	0.99331	1.0	1.0	18817	0	-39055
NHLRC1	4	0.0066862	0.29783	0.000665	733	4	-43118	0.99331	1.0	1.0	18822	0	-43118
TMC4	4	0.0066862	0.29783	0.000665	734	4	-37551	0.99331	1.0	1.0	18826	0	-37551
NDUFA9	4	0.0066862	0.29783	0.000665	735	4	-41586	0.99331	1.0	1.0	18823	0	-41586
HSP90AB1	4	0.0066862	0.29783	0.000665	736	4	-44694	0.99331	1.0	1.0	18819	0	-44694
ZNF519	4	0.0066862	0.29783	0.000665	737	4	-47383	0.99331	1.0	1.0	18816	0	-47383
TIGD3	4	0.0066862	0.29783	0.000665	738	4	-39964	0.99331	1.0	1.0	18821	0	-39964
SLCO5A1	4	0.0067512	0.29783	0.000665	739	3	-3127	0.30772	0.2852	0.692063	7634	1	-3127
ERICH2	4	0.0067512	0.29783	0.000665	740	4	-36131	0.98979	0.99999	1.0	18704	0	-36131
TMEM132D	4	0.0067512	0.29783	0.000665	741	4	-34731	0.98458	0.99998	1.0	18558	0	-34731
MEMO1	4	0.0067512	0.29783	0.000665	742	4	-27913	0.94386	0.98846	1.0	17886	0	-27913
QPCTL	4	0.0067512	0.29783	0.000665	743	3	-28772	0.47514	0.37637	0.738265	9617	1	-28772
TPGS2	4	0.0067512	0.29783	0.000665	744	4	-27874	0.97016	0.99941	1.0	18302	0	-27874
LTV1	4	0.0067512	0.29783	0.000665	745	3	-19546	0.035292	0.039812	0.444518	1704	1	-19546
RP1L1	4	0.0067512	0.29783	0.000665	746	3	-28974	0.47202	0.37637	0.738265	9570	1	-28974
MEX3A	4	0.0067512	0.29783	0.000665	747	4	-32992	0.98892	0.99999	1.0	18679	0	-32992
SIX4	4	0.0067512	0.29783	0.000665	748	4	-22562	0.95201	0.99405	1.0	18016	0	-22562
LSM8	4	0.0067512	0.29783	0.000665	749	3	-34021	0.10399	0.10504	0.514136	3590	1	-34021
PHF3	4	0.0067512	0.29783	0.000665	750	4	-29472	0.96559	0.99863	1.0	18235	0	-29472
MST1	4	0.0068976	0.29783	0.000665	751	4	-47897	0.9931	1.0	1.0	18810	0	-47897
SFTA3	4	0.0068976	0.29783	0.000665	752	4	-43661	0.9931	1.0	1.0	18813	0	-43661
PTGR1	4	0.0068976	0.29783	0.000665	753	4	-44931	0.9931	1.0	1.0	18809	0	-44931
ARHGAP32	4	0.0068976	0.29783	0.000665	754	4	-44095	0.9931	1.0	1.0	18806	0	-44095
EIF4G3	4	0.0068976	0.29783	0.000665	755	4	-4321	0.9931	1.0	1.0	18812	0	-4321
TSPYL2	4	0.0068976	0.29783	0.000665	756	4	-29311	0.9931	1.0	1.0	18814	0	-29311
PTDSS1	4	0.0068976	0.29783	0.000665	757	4	-40375	0.9931	1.0	1.0	18807	0	-40375
SLBP	4	0.0068976	0.29783	0.000665	758	4	-40729	0.9931	1.0	1.0	18808	0	-40729
ROBO2	4	0.0068976	0.29783	0.000665	759	4	-48501	0.9931	1.0	1.0	18815	0	-48501
METTL23	4	0.0068976	0.29783	0.000665	760	4	-4419	0.9931	1.0	1.0	18811	0	-4419
CHST11	4	0.0071058	0.29783	0.000665	761	4	-45566	0.99289	1.0	1.0	18804	0	-45566
TRIM72	4	0.0071058	0.29783	0.000665	762	4	-34884	0.99289	1.0	1.0	18802	0	-34884
CRYGS	4	0.0071058	0.29783	0.000665	763	4	-42208	0.99289	1.0	1.0	18799	0	-42208
HERC5	4	0.0071058	0.29783	0.000665	764	4	-41893	0.99289	1.0	1.0	18801	0	-41893
ADAMTS3	4	0.0071058	0.29783	0.000665	765	4	-37782	0.99289	1.0	1.0	18805	0	-37782
MEFV	4	0.0071058	0.29783	0.000665	766	4	-37092	0.99289	1.0	1.0	18798	0	-37092
CEP41	4	0.0071058	0.29783	0.000665	767	4	-40776	0.99289	1.0	1.0	18800	0	-40776
GFRA4	4	0.0073102	0.29783	0.000665	768	4	-34622	0.96882	0.99927	1.0	18286	0	-34622
C6orf163	4	0.0073102	0.29783	0.000665	769	3	-25235	0.59058	0.47332	0.799425	11306	1	-25235
RBM18	4	0.0073102	0.29783	0.000665	770	4	-37569	0.99179	1.0	1.0	18759	0	-37569
FOXD2	4	0.0073102	0.29783	0.000665	771	3	-26137	0.49818	0.38827	0.74264	9916	1	-26137
AAK1	4	0.0073102	0.29783	0.000665	772	4	-36132	0.98825	0.99999	1.0	18650	0	-36132
RBX1	4	0.0073102	0.29783	0.000665	773	3	-26549	0.30858	0.2852	0.692063	7644	1	-26549
SLC50A1	4	0.0073102	0.29783	0.000665	774	3	-25235	0.11236	0.1056	0.514136	3782	1	-25235
LRRC37B	4	0.0073102	0.29783	0.000665	775	2	-0.28942	0.43238	0.34465	0.724512	9056	1	-0.28942
P4HA3	4	0.0073102	0.29783	0.000665	776	3	-11324	0.87417	0.91654	1.0	16683	0	-11324
RMND5A	4	0.0073102	0.29783	0.000665	777	4	-24204	0.96391	0.99826	1.0	18209	0	-24204
EIF3D	4	0.0073102	0.29783	0.000665	778	3	-2.57	0.053117	0.068772	0.514136	2359	1	-2.57
PWWP2B	4	0.0073102	0.29783	0.000665	779	2	-12271	0.50465	0.39022	0.74264	10011	1	-12271
AURKA	4	0.0073102	0.29783	0.000665	780	2	-0.083736	0.072603	0.080061	0.514136	2817	2	-0.083736
SKIDA1	4	0.0073102	0.29783	0.000665	781	3	-26938	0.378	0.313	0.706959	8436	1	-26938
ARL6IP6	4	0.0073102	0.29783	0.000665	782	2	-0.7088	0.11667	0.10681	0.514136	3884	1	-0.7088
KLHL34	4	0.0073102	0.29783	0.000665	783	2	-0.61062	0.80117	0.80664	1.0	15317	0	-0.61062
KANSL2	4	0.0073102	0.29783	0.000665	784	4	-21555	0.96514	0.9985	1.0	18226	0	-21555
SPIN3	4	0.0073102	0.29783	0.000665	785	3	-18636	0.92504	0.97423	1.0	17569	0	-18636
PCDHGA12	4	0.0073102	0.29783	0.000665	786	3	-18658	0.9159	0.96661	1.0	17402	0	-18658
CDS2	4	0.0073173	0.29783	0.000665	787	4	-4063	0.99268	1.0	1.0	18795	0	-4063
DKK1	4	0.0073173	0.29783	0.000665	788	4	-42077	0.99268	1.0	1.0	18793	0	-42077
RNF181	4	0.0073173	0.29783	0.000665	789	4	-41129	0.99268	1.0	1.0	18797	0	-41129
IMPA2	4	0.0073173	0.29783	0.000665	790	4	-46892	0.99268	1.0	1.0	18794	0	-46892
KRTAP4-5	4	0.0073173	0.29783	0.000665	791	4	-40081	0.99268	1.0	1.0	18796	0	-40081
RPS15	4	0.0073804	0.29783	0.000665	792	3	-27863	0.14389	0.13157	0.555184	4519	1	-27863
KIF9	4	0.0073804	0.29783	0.000665	793	3	-29861	0.66325	0.59012	0.894681	12572	1	-29861
THBS3	4	0.0073804	0.29783	0.000665	794	3	-3634	0.58009	0.46337	0.793446	11145	1	-3634
SEMA3E	4	0.0073804	0.29783	0.000665	795	4	-23718	0.95134	0.99349	1.0	18008	0	-23718
GDAP2	4	0.0073804	0.29783	0.000665	796	3	-26052	0.0041	0.0034075	0.182449	320	1	-26052
QRICH1	4	0.0073804	0.29783	0.000665	797	3	-30207	0.10616	0.10504	0.514136	3635	1	-30207
NPY2R	4	0.0073804	0.29783	0.000665	798	3	-13647	0.59742	0.48127	0.806754	11398	1	-13647
SAMM50	4	0.0073804	0.29783	0.000665	799	4	-29747	0.94967	0.99265	1.0	17981	0	-29747
ZNF177	4	0.0073804	0.29783	0.000665	800	3	-34934	0.90084	0.95066	1.0	17150	0	-34934
PPRC1	4	0.0073804	0.29783	0.000665	801	3	-17884	0.64827	0.56824	0.884021	12284	1	-17884
CLEC18A	4	0.0073804	0.29783	0.000665	802	3	-31635	0.83081	0.85022	1.0	15886	0	-31635
LAT	4	0.0073804	0.29783	0.000665	803	3	-23983	0.47797	0.3783	0.738265	9657	1	-23983
METTL8	4	0.0073804	0.29783	0.000665	804	3	-33082	0.79391	0.78987	0.995216	15167	0	-33082
HIST1H3E	4	0.0073804	0.29783	0.000665	805	4	-32835	0.99202	1.0	1.0	18768	0	-32835
EFCAB1	4	0.0073804	0.29783	0.000665	806	4	-34375	0.98063	0.99995	1.0	18471	0	-34375
BMP1	4	0.0073804	0.29783	0.000665	807	4	-37111	0.96905	0.99928	1.0	18292	0	-37111
FMO1	4	0.0075315	0.29783	0.000665	808	4	-44702	0.99247	1.0	1.0	18785	0	-44702
CA4	4	0.0075315	0.29783	0.000665	809	4	-47725	0.99247	1.0	1.0	18787	0	-47725
FRAS1	4	0.0075315	0.29783	0.000665	810	4	-46548	0.99247	1.0	1.0	18792	0	-46548
SMYD4	4	0.0075315	0.29783	0.000665	811	4	-44193	0.99247	1.0	1.0	18789	0	-44193
SYN2	4	0.0075315	0.29783	0.000665	812	4	-44627	0.99247	1.0	1.0	18791	0	-44627
ZCCHC9	4	0.0075315	0.29783	0.000665	813	4	-41843	0.99247	1.0	1.0	18783	0	-41843
GFM2	4	0.0075315	0.29783	0.000665	814	4	-39546	0.99247	1.0	1.0	18786	0	-39546
KCTD13	4	0.0077532	0.29783	0.000665	815	4	-42444	0.99225	1.0	1.0	18781	0	-42444
PRR14L	4	0.0077532	0.29783	0.000665	816	4	-41086	0.99225	1.0	1.0	18780	0	-41086
C8orf37	4	0.0077532	0.29783	0.000665	817	4	-35933	0.99225	1.0	1.0	18777	0	-35933
NKX1-2	4	0.0077532	0.29783	0.000665	818	4	-42804	0.99225	1.0	1.0	18779	0	-42804
CLCN5	4	0.0077532	0.29783	0.000665	819	4	-48083	0.99225	1.0	1.0	18775	0	-48083
SLC13A2	4	0.0077532	0.29783	0.000665	820	4	-43132	0.99225	1.0	1.0	18776	0	-43132
ZNF806	4	0.0077532	0.29783	0.000665	821	4	-46555	0.99225	1.0	1.0	18782	0	-46555
CTXN3	4	0.0077532	0.29783	0.000665	822	4	-43932	0.99225	1.0	1.0	18778	0	-43932
AS3MT	4	0.0079838	0.30301	0.000665	823	4	-3812	0.99202	1.0	1.0	18766	0	-3812
MAP1S	4	0.0079838	0.30301	0.000665	824	4	-42823	0.99202	1.0	1.0	18767	0	-42823
P3H3	4	0.0079838	0.30301	0.000665	825	4	-42471	0.99202	1.0	1.0	18770	0	-42471
SRSF2	4	0.0079838	0.30301	0.000665	826	4	-33344	0.99202	1.0	1.0	18771	0	-33344
THBS4	4	0.0079838	0.30301	0.000665	827	4	-47855	0.99202	1.0	1.0	18769	0	-47855
STAB2	4	0.0079838	0.30301	0.000665	828	4	-42109	0.99202	1.0	1.0	18773	0	-42109
CUTA	4	0.0079838	0.30301	0.000665	829	4	-34968	0.99202	1.0	1.0	18772	0	-34968
CHD7	4	0.0080644	0.30301	0.000665	830	3	-31134	0.45523	0.3664	0.738265	9346	1	-31134
PMF1	4	0.0080644	0.30301	0.000665	831	3	-17329	0.60757	0.4951	0.817261	11570	1	-17329
BANP	4	0.0080644	0.30301	0.000665	832	3	-1888	0.39304	0.32094	0.710033	8607	1	-1888
UBE2N	4	0.0080644	0.30301	0.000665	833	4	-37092	0.98848	0.99999	1.0	18662	0	-37092
ASPG	4	0.0080644	0.30301	0.000665	834	3	-32657	0.39283	0.32094	0.710033	8603	1	-32657
SPATA18	4	0.0080644	0.30301	0.000665	835	3	-29747	0.60543	0.49305	0.815075	11531	1	-29747
FBXO47	4	0.0080644	0.30301	0.000665	836	3	-3108	0.52786	0.4061	0.749931	10349	1	-3108
UBE2Z	4	0.0080644	0.30301	0.000665	837	3	-33057	0.84865	0.87627	1.0	16218	0	-33057
CASP7	4	0.0080644	0.30301	0.000665	838	4	-36267	0.97948	0.99994	1.0	18450	0	-36267
C12orf43	4	0.0080644	0.30301	0.000665	839	3	-35643	0.21178	0.21006	0.656968	6110	1	-35643
TDO2	4	0.0080644	0.30301	0.000665	840	3	-32483	0.5214	0.40214	0.745076	10250	1	-32483
PPM1M	4	0.0080644	0.30301	0.000665	841	3	-35817	0.35412	0.29724	0.693142	8167	1	-35817
C11orf53	4	0.0080644	0.30301	0.000665	842	3	-32359	0.021645	0.02323	0.373704	1151	1	-32359
TSR2	4	0.0080644	0.30301	0.000665	843	4	-37285	0.99109	1.0	1.0	18737	0	-37285
PITX1	4	0.0080644	0.30301	0.000665	844	3	-33234	0.010649	0.010572	0.294475	636	1	-33234
HAGHL	4	0.0080644	0.30301	0.000665	845	3	-29604	0.92938	0.97747	1.0	17639	0	-29604
POU5F1B	4	0.0080644	0.30301	0.000665	846	3	-21562	0.92093	0.97182	1.0	17494	0	-21562
MORC2	4	0.0082131	0.30301	0.000665	847	4	-4.29	0.99179	1.0	1.0	18764	0	-4.29
LILRB3	4	0.0082131	0.30301	0.000665	848	4	-3499	0.99179	1.0	1.0	18763	0	-3499
LOC158434	4	0.0082131	0.30301	0.000665	849	4	-44322	0.99179	1.0	1.0	18762	0	-44322
SCYL3	4	0.0082131	0.30301	0.000665	850	4	-48138	0.99179	1.0	1.0	18765	0	-48138
CACNB4	4	0.0082131	0.30301	0.000665	851	4	-38492	0.99179	1.0	1.0	18760	0	-38492
MACF1	4	0.008446	0.03056	0.000665	852	4	-44183	0.99155	1.0	1.0	18754	0	-44183
MLN	4	0.008446	0.03056	0.000665	853	4	-47555	0.99155	1.0	1.0	18750	0	-47555
PANX3	4	0.008446	0.03056	0.000665	854	4	-43691	0.99155	1.0	1.0	18752	0	-43691
GNG5	4	0.008446	0.03056	0.000665	855	4	-47336	0.99155	1.0	1.0	18756	0	-47336
SERPINI1	4	0.008446	0.03056	0.000665	856	4	-44917	0.99155	1.0	1.0	18751	0	-44917
TRIB2	4	0.008446	0.03056	0.000665	857	4	-41481	0.99155	1.0	1.0	18755	0	-41481
CALML3	4	0.008446	0.03056	0.000665	858	4	-46021	0.99155	1.0	1.0	18753	0	-46021
OR56A5	4	0.008446	0.03056	0.000665	859	4	-45371	0.99155	1.0	1.0	18757	0	-45371
CTAGE1	4	0.0086657	0.30819	0.000665	860	4	-36158	0.98556	0.99998	1.0	18583	0	-36158
RBM42	4	0.0086657	0.30819	0.000665	861	2	0.11588	0.15603	0.14064	0.556148	4802	1	0.11588
SYNM	4	0.0086657	0.30819	0.000665	862	2	-0.7566	0.34256	0.29326	0.692063	8031	1	-0.7566
OSGIN1	4	0.0086657	0.30819	0.000665	863	4	-20422	0.96478	0.99841	1.0	18218	0	-20422
NUP54	4	0.0086657	0.30819	0.000665	864	2	-0.5563	0.20619	0.20344	0.650282	5974	2	-0.5563
PPP1R18	4	0.0086657	0.30819	0.000665	865	3	-2766	0.4731	0.37637	0.738265	9586	1	-2766
CLNS1A	4	0.0086657	0.30819	0.000665	866	2	-0.11202	0.037749	0.049161	0.513998	1808	2	-0.11202
MAG	4	0.0086657	0.30819	0.000665	867	3	-22371	0.88071	0.92683	1.0	16803	0	-22371
PDPR	4	0.0086657	0.30819	0.000665	868	4	-40989	0.97858	0.99993	1.0	18435	0	-40989
TRIT1	4	0.0086657	0.30819	0.000665	869	3	-18694	0.64778	0.56629	0.881771	12274	1	-18694
CBWD5	4	0.0086657	0.30819	0.000665	870	2	0.30484	0.077932	0.085644	0.514136	2950	2	0.30484
SSBP4	4	0.0086657	0.30819	0.000665	871	3	-17676	0.51286	0.39621	0.745076	10122	1	-17676
SCYL1	4	0.0086657	0.30819	0.000665	872	3	-26488	0.25689	0.27145	0.692063	7109	1	-26488
ORMDL3	4	0.0086657	0.30819	0.000665	873	3	-2.69	0.76	0.72948	0.95627	14534	0	-2.69
MED30	4	0.0086657	0.30819	0.000665	874	3	-22665	0.40261	0.3269	0.715862	8713	1	-22665
KIAA1755	4	0.0086657	0.30819	0.000665	875	3	-22665	0.7585	0.72646	0.95627	14505	0	-22665
DDX51	4	0.0086657	0.30819	0.000665	876	2	-0.23315	0.22013	0.22351	0.676745	6282	2	-0.23315
CCBL2	4	0.0086657	0.30819	0.000665	877	3	-20097	0.36557	0.30523	0.703281	8296	1	-20097
SFN	4	0.0086657	0.30819	0.000665	878	2	-0.11949	0.20719	0.20568	0.652531	6000	2	-0.11949
EIF5	4	0.0086657	0.30819	0.000665	879	3	-21906	0.051579	0.068462	0.514136	2315	1	-21906
STAMBPL1	4	0.0086852	0.31337	0.000665	880	4	-40664	0.99131	1.0	1.0	18746	0	-40664
GPR37L1	4	0.0086852	0.31337	0.000665	881	4	-36314	0.99131	1.0	1.0	18741	0	-36314
FGF13	4	0.0086852	0.31337	0.000665	882	4	-37339	0.99131	1.0	1.0	18747	0	-37339
RBM7	4	0.0086852	0.31337	0.000665	883	4	-48264	0.99131	1.0	1.0	18742	0	-48264
NUTM2F	4	0.0086852	0.31337	0.000665	884	4	-41653	0.99131	1.0	1.0	18740	0	-41653
TDRD5	4	0.0086852	0.31337	0.000665	885	4	-45867	0.99131	1.0	1.0	18743	0	-45867
ARF4	4	0.0088609	0.31337	0.000665	886	3	-23071	0.13099	0.12011	0.53667	4233	1	-23071
ARHGAP36	4	0.0088609	0.31337	0.000665	887	3	-20348	0.84025	0.86326	1.0	16052	0	-20348
SMR3B	4	0.0088609	0.31337	0.000665	888	3	-11412	0.6525	0.57429	0.884933	12369	1	-11412
FANCM	4	0.0088609	0.31337	0.000665	889	3	-31154	0.89505	0.94328	1.0	17060	0	-31154
CCDC82	4	0.0088609	0.31337	0.000665	890	3	-36563	0.89481	0.94279	1.0	17055	0	-36563
C14orf28	4	0.0088609	0.31337	0.000665	891	3	-32474	0.62115	0.52674	0.852763	11798	1	-32474
CYTH3	4	0.0088609	0.31337	0.000665	892	3	-28347	0.84562	0.87296	1.0	16147	0	-28347
VPS25	4	0.0088609	0.31337	0.000665	893	3	-32141	0.10338	0.10504	0.514136	3581	1	-32141
BAP1	4	0.0088609	0.31337	0.000665	894	3	-31342	0.36412	0.3032	0.700309	8276	1	-31342
FOXD4	4	0.0088609	0.31337	0.000665	895	3	-24314	0.63601	0.55446	0.878447	12057	1	-24314
CFLAR	4	0.0088609	0.31337	0.000665	896	3	-24891	0.573	0.45541	0.789375	11027	1	-24891
EXOC3L1	4	0.0088609	0.31337	0.000665	897	3	-1535	0.69421	0.63312	0.914885	13195	0	-1535
RPN2	4	0.0088609	0.31337	0.000665	898	3	-0.57365	0.24572	0.2568	0.692063	6873	1	-0.57365
PHF23	4	0.0088609	0.31337	0.000665	899	4	-30674	0.9835	0.99997	1.0	18526	0	-30674
ICAM5	4	0.0088609	0.31337	0.000665	900	4	-30321	0.96716	0.99887	1.0	18262	0	-30321
PMP22	4	0.0088609	0.31337	0.000665	901	3	-19546	0.82189	0.83981	1.0	15719	0	-19546
C14orf166	4	0.0089085	0.31596	0.000665	902	4	-47905	0.99109	1.0	1.0	18733	0	-47905
HDLBP	4	0.0089085	0.31596	0.000665	903	4	-43433	0.99109	1.0	1.0	18739	0	-43433
OR8J3	4	0.0089085	0.31596	0.000665	904	4	-43223	0.99109	1.0	1.0	18738	0	-43223
HEPHL1	4	0.0089085	0.31596	0.000665	905	4	-40892	0.99109	1.0	1.0	18734	0	-40892
WDR49	4	0.0089085	0.31596	0.000665	906	4	-44283	0.99109	1.0	1.0	18736	0	-44283
ZNF671	4	0.0089085	0.31596	0.000665	907	4	-40627	0.99109	1.0	1.0	18731	0	-40627
PPP6R1	4	0.0089085	0.31596	0.000665	908	4	-40369	0.99109	1.0	1.0	18732	0	-40369
TRIM6	4	0.0091086	0.31855	0.000668	909	4	-44658	0.99089	1.0	1.0	18729	0	-44658
ZNF695	4	0.0091086	0.31855	0.000668	910	4	-43127	0.99089	1.0	1.0	18730	0	-43127
NOD2	4	0.0091086	0.31855	0.000668	911	4	-42743	0.99089	1.0	1.0	18728	0	-42743
LRCOL1	4	0.0093051	0.32373	0.000676	912	4	-4351	0.99069	1.0	1.0	18726	0	-4351
MICAL1	4	0.0093051	0.32373	0.000676	913	4	-41129	0.99069	1.0	1.0	18724	0	-41129
C4orf36	4	0.0093051	0.32373	0.000676	914	4	-39527	0.99069	1.0	1.0	18725	0	-39527
CDH13	4	0.0093051	0.32373	0.000676	915	4	-4247	0.99069	1.0	1.0	18727	0	-4247
RBM43	4	0.0095236	0.32632	0.000679	916	4	-42391	0.99048	1.0	1.0	18722	0	-42391
ADH1B	4	0.0095236	0.32632	0.000679	917	4	-39083	0.99048	1.0	1.0	18718	0	-39083
G3BP2	4	0.0095236	0.32632	0.000679	918	4	-40081	0.99048	1.0	1.0	18723	0	-40081
FZD4	4	0.0095236	0.32632	0.000679	919	4	-44193	0.99048	1.0	1.0	18721	0	-44193
DPH7	4	0.0096411	0.34963	0.000716	920	3	-16072	0.48947	0.38028	0.740078	9808	1	-16072
PLA2G5	4	0.0096411	0.34963	0.000716	921	4	-3799	0.97612	0.99987	1.0	18393	0	-3799
TET3	4	0.0096411	0.34963	0.000716	922	3	-34265	0.86474	0.90578	1.0	16505	0	-34265
SUPT6H	4	0.0096411	0.34963	0.000716	923	3	-0.99668	0.25175	0.26373	0.692063	7002	1	-0.99668
DBT	4	0.0096411	0.34963	0.000716	924	3	-32742	0.78763	0.78116	0.990488	15044	0	-32742
HIPK3	4	0.0096411	0.34963	0.000716	925	3	-32631	0.066261	0.075431	0.514136	2667	1	-32631
MBNL2	4	0.0096411	0.34963	0.000716	926	3	-20348	0.90937	0.96118	1.0	17297	0	-20348
CHAF1A	4	0.0096411	0.34963	0.000716	927	3	-14961	0.34016	0.29326	0.692063	8001	1	-14961
NOTO	4	0.0096411	0.34963	0.000716	928	3	-31486	0.084742	0.092512	0.514136	3102	1	-31486
PRPF8	4	0.0096411	0.34963	0.000716	929	3	-21354	0.22097	0.22687	0.676745	6301	1	-21354
C19orf53	4	0.0096411	0.34963	0.000716	930	3	-28639	0.18328	0.16567	0.579908	5459	1	-28639
EIF4E2	4	0.0096411	0.34963	0.000716	931	4	-31049	0.94443	0.98912	1.0	17893	0	-31049
PRKAR1A	4	0.0096411	0.34963	0.000716	932	4	-37807	0.98958	0.99999	1.0	18701	0	-37807
DHRS11	4	0.0096411	0.34963	0.000716	933	3	-20247	0.60233	0.49108	0.815075	11478	1	-20247
GLTSCR2	4	0.0096411	0.34963	0.000716	934	3	-2766	0.42312	0.33865	0.719007	8941	1	-2766
CLDN18	4	0.0097556	0.37294	0.000753	935	4	-39908	0.99024	0.99999	1.0	18714	0	-39908
CASD1	4	0.0097556	0.37294	0.000753	936	4	-48253	0.99024	0.99999	1.0	18710	0	-48253
PRKAA2	4	0.0097556	0.37294	0.000753	937	4	-40664	0.99024	0.99999	1.0	18711	0	-40664
CFDP1	4	0.0097556	0.37294	0.000753	938	4	-4249	0.99024	0.99999	1.0	18717	0	-4249
CLDN25	4	0.0097556	0.37294	0.000753	939	4	-48046	0.99024	0.99999	1.0	18709	0	-48046
OR2L3	4	0.0097556	0.37294	0.000753	940	4	-42292	0.99024	0.99999	1.0	18715	0	-42292
DCAF4	4	0.0097556	0.37294	0.000753	941	4	-46816	0.99024	0.99999	1.0	18716	0	-46816
MYH6	4	0.0097556	0.37294	0.000753	942	4	-44773	0.99024	0.99999	1.0	18712	0	-44773
ZNF516	4	0.0097556	0.37294	0.000753	943	4	-34162	0.99024	0.99999	1.0	18713	0	-34162
GAGE12J	4	0.0099829	0.38071	0.000753	944	4	-44973	0.99002	0.99999	1.0	18708	0	-44973
LMNB2	4	0.0099829	0.38071	0.000753	945	4	-45945	0.99002	0.99999	1.0	18707	0	-45945
ADAM19	4	0.010202	0.38071	0.000753	946	3	-20832	0.39023	0.31895	0.710033	8573	1	-20832
LRP2BP	4	0.010202	0.38071	0.000753	947	2	-0.68082	0.046705	0.066157	0.514136	2169	1	-0.68082
SRPX2	4	0.010202	0.38071	0.000753	948	4	-26387	0.96149	0.99768	1.0	18166	0	-26387
PDGFB	4	0.010202	0.38071	0.000753	949	3	-26824	0.53751	0.41595	0.757522	10488	1	-26824
HADHB	4	0.010202	0.38071	0.000753	950	2	-0.58485	0.44479	0.36043	0.738265	9199	1	-0.58485
CREG1	4	0.010202	0.38071	0.000753	951	3	-14061	0.8743	0.91684	1.0	16687	0	-14061
UBE2C	4	0.010202	0.38071	0.000753	952	3	-26387	0.36311	0.3032	0.700309	8265	1	-26387
PNLIPRP1	4	0.010202	0.38071	0.000753	953	4	-26387	0.95541	0.99529	1.0	18073	0	-26387
FBXW5	4	0.010202	0.38071	0.000753	954	3	-23001	0.84797	0.87627	1.0	16200	0	-23001
MFAP4	4	0.010202	0.38071	0.000753	955	3	-18011	0.84474	0.87123	1.0	16134	0	-18011
ZNF79	4	0.010202	0.38071	0.000753	956	3	-25425	0.35412	0.29724	0.693142	8168	1	-25425
POP5	4	0.010202	0.38071	0.000753	957	3	-25922	0.65103	0.57429	0.884933	12338	1	-25922
KCNMB4	4	0.010202	0.38071	0.000753	958	3	-16489	0.70958	0.65163	0.918738	13500	0	-16489
LILRB5	4	0.010202	0.38071	0.000753	959	3	-15205	0.86707	0.90779	1.0	16545	0	-15205
TAF8	4	0.010202	0.38071	0.000753	960	2	-0.99871	0.56154	0.4397	0.771729	10845	1	-0.99871
DUSP21	4	0.010202	0.38071	0.000753	961	3	-24314	0.49156	0.38428	0.74264	9833	1	-24314
GGA3	4	0.010202	0.38071	0.000753	962	2	-0.27116	0.33609	0.29326	0.692063	7946	1	-0.27116
HS3ST2	4	0.010202	0.38071	0.000753	963	4	-38428	0.98892	0.99999	1.0	18682	0	-38428
CHRNA2	4	0.010202	0.38071	0.000753	964	2	-0.83177	0.52517	0.40214	0.745076	10308	1	-0.83177
GAL3ST3	4	0.010202	0.38071	0.000753	965	2	-0.29979	0.055074	0.068773	0.514136	2402	2	-0.29979
GEMIN5	4	0.010206	0.38071	0.000753	966	4	-44699	0.98979	0.99999	1.0	18705	0	-44699
FAM84B	4	0.010214	0.0019807	0.035956	967	3	-25094	0.76453	0.73546	0.960271	14633	0	-25094
ATR	4	0.010214	0.0019807	0.035956	968	2	-0.068473	0.37123	0.30913	0.704374	8361	1	-0.068473
CFAP69	4	0.010214	0.0019807	0.035956	969	1	0.96995	0.52763	0.4061	0.749931	10348	1	0.96995
MVP	4	0.010214	0.0019807	0.035956	970	1	12356	0.21646	0.21566	0.661157	6209	2	12356
HIST3H3	4	0.010214	0.0019807	0.035956	971	2	0.0053488	0.16921	0.15623	0.579908	5122	1	0.0053488
FOXL1	4	0.010214	0.0019807	0.035956	972	1	21036	0.016611	0.01971	0.373704	918	3	21036
NRDE2	4	0.010214	0.0019807	0.035956	973	2	-0.40036	0.85618	0.89374	1.0	16352	0	-0.40036
SPRR1A	4	0.010214	0.0019807	0.035956	974	1	11997	0.49164	0.38428	0.74264	9836	1	11997
NUF2	4	0.010214	0.0019807	0.035956	975	1	22804	0.016426	0.01971	0.373704	908	3	22804
LPCAT2	4	0.010214	0.0019807	0.035956	976	1	0.98246	0.25862	0.2734	0.692063	7123	1	0.98246
ODF3L1	4	0.010214	0.0019807	0.035956	977	3	-11598	0.15541	0.14064	0.556148	4788	1	-11598
PRIM2	4	0.010214	0.0019807	0.035956	978	2	-0.30154	0.52029	0.40214	0.745076	10236	1	-0.30154
TRPC1	4	0.010214	0.0019807	0.035956	979	3	-28462	0.93052	0.97862	1.0	17662	0	-28462
GALC	4	0.010214	0.0019807	0.035956	980	2	0.68973	0.056399	0.069094	0.514136	2435	2	0.68973
PIP4K2C	4	0.010214	0.0019807	0.035956	981	2	0.76629	0.024706	0.025872	0.373704	1285	2	0.76629
SUSD2	4	0.010214	0.0019807	0.035956	982	2	0.0069276	0.28903	0.27934	0.692063	7437	1	0.0069276
MAGEA3	4	0.010214	0.0019807	0.035956	983	3	-0.52504	0.88294	0.92847	1.0	16846	0	-0.52504
LOC102723859	4	0.010214	0.0019807	0.035956	984	2	-0.6591	0.37438	0.31108	0.706045	8394	1	-0.6591
TCAF1	4	0.010214	0.0019807	0.035956	985	2	0.233	0.17703	0.16304	0.579908	5313	2	0.233
LOC339862	4	0.010214	0.0019807	0.035956	986	3	-2965	0.93189	0.98035	1.0	17693	0	-2965
TUFM	4	0.010214	0.0019807	0.035956	987	3	-23355	0.4619	0.37637	0.738265	9432	1	-23355
NFRKB	4	0.010214	0.0019807	0.035956	988	2	-0.70173	0.633	0.5525	0.878408	11999	1	-0.70173
RALY	4	0.010214	0.0019807	0.035956	989	3	-30981	0.13359	0.1214	0.53667	4294	1	-30981
CBL	4	0.010214	0.0019807	0.035956	990	3	-0.81912	0.68928	0.62936	0.914885	13080	0	-0.81912
RBMY1J	4	0.010214	0.0019807	0.035956	991	2	0.22944	0.80506	0.81359	1.0	15400	0	0.22944
POLK	4	0.010214	0.0019807	0.035956	992	2	0.7453	0.058014	0.069433	0.514136	2471	2	0.7453
KIAA1644	4	0.010214	0.0019807	0.035956	993	2	0.20095	0.19495	0.1782	0.591579	5725	2	0.20095
HIP1	4	0.010214	0.0019807	0.035956	994	1	0.92122	0.072919	0.080061	0.514136	2821	2	0.92122
ATF3	4	0.010214	0.0019807	0.035956	995	2	-0.3894	0.31547	0.28721	0.692063	7715	1	-0.3894
ERCC6L	4	0.010214	0.0019807	0.035956	996	2	-0.56685	0.37927	0.313	0.706959	8453	1	-0.56685
C9orf116	4	0.010214	0.0019807	0.035956	997	3	-0.81574	0.010649	0.010572	0.294475	634	1	-0.81574
DAXX	4	0.010214	0.0019807	0.035956	998	2	0.80146	0.021513	0.022849	0.373704	1139	2	0.80146
SLIRP	4	0.010214	0.0019807	0.035956	999	3	-32103	0.28723	0.27738	0.692063	7418	1	-32103
HECW1	4	0.010214	0.0019807	0.035956	1000	2	-0.33133	0.046007	0.065455	0.514136	2144	1	-0.33133
MMP3	4	0.010214	0.0019807	0.035956	1001	2	0.38132	0.019789	0.02172	0.373704	1068	2	0.38132
OR10G2	4	0.010214	0.0019807	0.035956	1002	1	1808	0.041631	0.058395	0.514136	1969	3	1808
GPR27	4	0.010214	0.0019807	0.035956	1003	2	0.21164	0.37565	0.31108	0.706045	8406	1	0.21164
MICAL2	4	0.010214	0.0019807	0.035956	1004	2	0.07382	0.093411	0.098347	0.514136	3325	1	0.07382
KCNN1	4	0.010214	0.0019807	0.035956	1005	1	11777	0.62986	0.54856	0.877974	11943	1	11777
ISY1	4	0.010214	0.0019807	0.035956	1006	2	-0.16693	0.17008	0.1596	0.579908	5146	1	-0.16693
SCN2B	4	0.010214	0.0019807	0.035956	1007	2	0.97724	0.092462	0.097811	0.514136	3298	2	0.97724
ACAT1	4	0.010214	0.0019807	0.035956	1008	3	-28018	0.91918	0.97043	1.0	17462	0	-28018
COL8A2	4	0.010214	0.0019807	0.035956	1009	3	-24373	0.31489	0.28721	0.692063	7706	1	-24373
SLFN12	4	0.010214	0.0019807	0.035956	1010	2	-0.24657	0.52268	0.40214	0.745076	10274	1	-0.24657
ZNF541	4	0.010214	0.0019807	0.035956	1011	2	0.14673	0.56245	0.4397	0.771729	10862	1	0.14673
C3orf33	4	0.010214	0.0019807	0.035956	1012	4	-2244	0.96327	0.99817	1.0	18193	0	-2244
TCIRG1	4	0.010214	0.0019807	0.035956	1013	3	-2106	0.86142	0.9009	1.0	16443	0	-2106
SYBU	4	0.010214	0.0019807	0.035956	1014	2	-0.60489	0.24572	0.2568	0.692063	6869	1	-0.60489
CLEC2L	4	0.010214	0.0019807	0.035956	1015	3	-0.87582	0.33874	0.29326	0.692063	7979	1	-0.87582
LOC645382	4	0.010214	0.0019807	0.035956	1016	3	-26907	0.92786	0.97601	1.0	17616	0	-26907
SULT1A4	4	0.010214	0.0019807	0.035956	1017	1	18546	0.03524	0.039812	0.444518	1700	3	18546
RPS13	4	0.010214	0.0019807	0.035956	1018	4	-12455	0.97592	0.99987	1.0	18391	0	-12455
NLRP6	4	0.010214	0.0019807	0.035956	1019	2	0.13297	0.51561	0.39819	0.745076	10162	1	0.13297
LRRC26	4	0.010214	0.0019807	0.035956	1020	3	-24921	0.067904	0.076174	0.514136	2708	1	-24921
UBXN6	4	0.010214	0.0019807	0.035956	1021	4	-24568	0.96032	0.99759	1.0	18150	0	-24568
FMNL1	4	0.010214	0.0019807	0.035956	1022	2	0.61592	0.073041	0.080061	0.514136	2825	2	0.61592
STXBP6	4	0.010214	0.0019807	0.035956	1023	3	-26772	0.93605	0.98294	1.0	17770	0	-26772
TMEM8A	4	0.010214	0.0019807	0.035956	1024	2	0.33628	0.13323	0.1214	0.53667	4290	2	0.33628
PLA2G16	4	0.010214	0.0019807	0.035956	1025	2	-0.11312	0.22428	0.22687	0.676745	6376	1	-0.11312
CXCL12	4	0.010214	0.0019807	0.035956	1026	1	2094	0.01418	0.015312	0.356286	800	3	2094
PRDM7	4	0.010214	0.0019807	0.035956	1027	2	-0.15204	0.26573	0.2734	0.692063	7185	1	-0.15204
NGDN	4	0.010214	0.0019807	0.035956	1028	3	-0.81574	0.8005	0.80431	1.0	15301	0	-0.81574
SSX1	4	0.010214	0.0019807	0.035956	1029	1	18701	0.052896	0.068772	0.514136	2354	2	18701
GDI1	4	0.010214	0.0019807	0.035956	1030	1	1122	0.06839	0.076174	0.514136	2722	2	1122
LACTB	4	0.010214	0.0019807	0.035956	1031	3	-23355	0.25046	0.26373	0.692063	6981	1	-23355
EDNRB	4	0.010214	0.0019807	0.035956	1032	1	0.94908	0.18746	0.17344	0.591552	5563	2	0.94908
KCNH5	4	0.010214	0.0019807	0.035956	1033	2	-0.63198	0.88644	0.93329	1.0	16908	0	-0.63198
SPDYE2B	4	0.010214	0.0019807	0.035956	1034	3	-14928	0.56381	0.4397	0.771729	10879	1	-14928
CPNE9	4	0.010214	0.0019807	0.035956	1035	2	-0.70035	0.50809	0.39218	0.745076	10058	1	-0.70035
CCDC86	4	0.010214	0.0019807	0.035956	1036	3	-2575	0.70047	0.64253	0.918738	13320	0	-2575
ENTHD2	4	0.010214	0.0019807	0.035956	1037	4	-42155	0.98417	0.99998	1.0	18540	0	-42155
MRFAP1L1	4	0.010214	0.0019807	0.035956	1038	1	0.55768	0.53449	0.41399	0.757522	10438	1	0.55768
MRPL10	4	0.010214	0.0019807	0.035956	1039	3	-23983	0.71498	0.66069	0.918738	13606	0	-23983
MRPL57	4	0.010214	0.0019807	0.035956	1040	2	0.29993	0.11255	0.1056	0.514136	3786	2	0.29993
HN1	4	0.010214	0.0019807	0.035956	1041	2	-0.14416	0.21439	0.21454	0.660911	6174	1	-0.14416
RMDN3	4	0.010214	0.0019807	0.035956	1042	3	-30749	0.71712	0.66069	0.918738	13654	0	-30749
AXIN1	4	0.010214	0.0019807	0.035956	1043	3	-24743	0.74948	0.71421	0.950193	14321	0	-24743
PIANP	4	0.010214	0.0019807	0.035956	1044	2	0.48502	0.46993	0.37637	0.738265	9544	1	0.48502
TSR3	4	0.010214	0.0019807	0.035956	1045	1	28195	0.0043415	0.0036074	0.182449	334	3	28195
GDPD1	4	0.010214	0.0019807	0.035956	1046	3	-3393	0.91273	0.96486	1.0	17355	0	-3393
SEBOX	4	0.010214	0.0019807	0.035956	1047	2	0.087693	0.28593	0.27738	0.692063	7401	1	0.087693
SLX4	4	0.010214	0.0019807	0.035956	1048	3	-22668	0.45884	0.37238	0.738265	9390	1	-22668
TAC4	4	0.010214	0.0019807	0.035956	1049	3	-27786	0.91717	0.96802	1.0	17424	0	-27786
CABLES1	4	0.010214	0.0019807	0.035956	1050	2	-0.54322	0.30483	0.2852	0.692063	7604	1	-0.54322
MAD2L1	4	0.010214	0.0019807	0.035956	1051	1	19275	0.085065	0.092512	0.514136	3108	2	19275
SPATA31A7	4	0.010214	0.0019807	0.035956	1052	3	-22424	0.54731	0.42985	0.768953	10644	1	-22424
EARS2	4	0.010214	0.0019807	0.035956	1053	3	-27169	0.89575	0.94423	1.0	17075	0	-27169
MED12	4	0.010376	0.0039228	0.039326	1054	3	-20895	0.82789	0.84734	1.0	15827	0	-20895
MRPL38	4	0.010376	0.0039228	0.039326	1055	3	-3634	0.25131	0.26373	0.692063	6994	1	-3634
CXCL14	4	0.010376	0.0039228	0.039326	1056	3	-27913	0.8829	0.92847	1.0	16845	0	-27913
LRRC10	4	0.010376	0.0039228	0.039326	1057	3	-31485	0.6153	0.50693	0.827421	11706	1	-31485
MUC6	4	0.010376	0.0039228	0.039326	1058	3	-16407	0.8868	0.93329	1.0	16916	0	-16407
DSPP	4	0.010376	0.0039228	0.039326	1059	3	-19958	0.74738	0.71264	0.950193	14279	0	-19958
ACADVL	4	0.010376	0.0039228	0.039326	1060	3	-26348	0.64161	0.56234	0.879138	12155	1	-26348
POPDC3	4	0.010376	0.0039228	0.039326	1061	3	-37454	0.89094	0.93795	1.0	16986	0	-37454
PPP1R35	4	0.010376	0.0039228	0.039326	1062	3	-16407	0.12348	0.10926	0.514136	4045	1	-16407
MDGA2	4	0.010376	0.0039228	0.039326	1063	3	-36157	0.22786	0.23143	0.684697	6461	1	-36157
TRMT12	4	0.010376	0.0039228	0.039326	1064	3	-38839	0.62771	0.54066	0.867801	11908	1	-38839
DZIP1	4	0.010376	0.0039228	0.039326	1065	3	-21069	0.91993	0.97182	1.0	17470	0	-21069
MAP9	4	0.010376	0.0039228	0.039326	1066	4	-22399	0.96597	0.99871	1.0	18246	0	-22399
DUSP19	4	0.010376	0.0039228	0.039326	1067	3	-14549	0.40742	0.33465	0.719007	8764	1	-14549
OTP	4	0.010376	0.0039228	0.039326	1068	3	-23451	0.13967	0.13022	0.555184	4425	1	-23451
CTDP1	4	0.010376	0.0039228	0.039326	1069	3	-12616	0.27663	0.2734	0.692063	7304	1	-12616
MED28	4	0.010376	0.0039228	0.039326	1070	4	-1603	0.95184	0.99387	1.0	18011	0	-1603
ANO1	4	0.010376	0.0039228	0.039326	1071	3	-31753	0.56245	0.4397	0.771729	10860	1	-31753
MNX1	4	0.010376	0.0039228	0.039326	1072	3	-37064	0.011162	0.010773	0.294475	656	1	-37064
FERMT3	4	0.010376	0.0039228	0.039326	1073	3	-19108	0.49006	0.38028	0.740078	9813	1	-19108
ME3	4	0.010376	0.0039228	0.039326	1074	3	-29311	0.85259	0.88526	1.0	16286	0	-29311
NRXN1	4	0.010376	0.0039228	0.039326	1075	3	-37642	0.11773	0.10741	0.514136	3910	1	-37642
PPP2R3A	4	0.010416	0.0039228	0.039326	1076	4	-47725	0.98958	0.99999	1.0	18695	0	-47725
OCIAD1	4	0.010416	0.0039228	0.039326	1077	4	-39433	0.98958	0.99999	1.0	18697	0	-39433
TMEM110	4	0.010416	0.0039228	0.039326	1078	4	-49418	0.98958	0.99999	1.0	18696	0	-49418
TXN2	4	0.010416	0.0039228	0.039326	1079	4	-42135	0.98958	0.99999	1.0	18703	0	-42135
ZNF23	4	0.010416	0.0039228	0.039326	1080	4	-4.31	0.98958	0.99999	1.0	18700	0	-4.31
RBM10	4	0.010416	0.0039228	0.039326	1081	4	-42989	0.98958	0.99999	1.0	18699	0	-42989
PITX3	4	0.010416	0.0039228	0.039326	1082	4	-47954	0.98958	0.99999	1.0	18702	0	-47954
TRIML1	4	0.010624	0.0039236	0.039326	1083	4	-44798	0.98938	0.99999	1.0	18691	0	-44798
LRRC18	4	0.010624	0.0039236	0.039326	1084	4	-44782	0.98938	0.99999	1.0	18692	0	-44782
BCL2	4	0.010624	0.0039236	0.039326	1085	4	-34922	0.98938	0.99999	1.0	18694	0	-34922
GLMP	4	0.010852	0.0039239	0.039326	1086	4	-4503	0.98915	0.99999	1.0	18687	0	-4503
ANXA1	4	0.010852	0.0039239	0.039326	1087	4	-42696	0.98915	0.99999	1.0	18685	0	-42696
SCGB2A2	4	0.010852	0.0039239	0.039326	1088	4	-44742	0.98915	0.99999	1.0	18690	0	-44742
TRPV1	4	0.010852	0.0039239	0.039326	1089	4	-46927	0.98915	0.99999	1.0	18689	0	-46927
OR52K1	4	0.010852	0.0039239	0.039326	1090	4	-45368	0.98915	0.99999	1.0	18688	0	-45368
SPATA5	4	0.010852	0.0039239	0.039326	1091	4	-46075	0.98915	0.99999	1.0	18686	0	-46075
KLRD1	4	0.011084	0.0039239	0.039326	1092	4	-44176	0.98892	0.99999	1.0	18683	0	-44176
PPP2R5D	4	0.011084	0.0039239	0.039326	1093	4	-44601	0.98892	0.99999	1.0	18681	0	-44601
POU6F2	4	0.011084	0.0039239	0.039326	1094	4	-40892	0.98892	0.99999	1.0	18684	0	-40892
PLAGL1	4	0.011084	0.0039239	0.039326	1095	4	-34628	0.98892	0.99999	1.0	18677	0	-34628
PIGK	4	0.011163	0.0039239	0.039326	1096	3	-33375	0.56175	0.4397	0.771729	10848	1	-33375
SENP3	4	0.011163	0.0039239	0.039326	1097	3	-25518	0.23253	0.24257	0.692063	6556	1	-25518
PSMC3	4	0.011163	0.0039239	0.039326	1098	3	-30674	0.27969	0.27437	0.692063	7338	1	-30674
GABRE	4	0.011163	0.0039239	0.039326	1099	3	-34705	0.92228	0.97316	1.0	17523	0	-34705
RFC5	4	0.011163	0.0039239	0.039326	1100	3	-30583	0.14838	0.13438	0.55577	4614	1	-30583
LAT2	4	0.011163	0.0039239	0.039326	1101	3	-33627	0.54295	0.42402	0.764284	10585	1	-33627
CD101	4	0.011163	0.0039239	0.039326	1102	3	-31898	0.41193	0.33465	0.719007	8816	1	-31898
ZNF835	4	0.011163	0.0039239	0.039326	1103	3	-17884	0.40547	0.33085	0.719007	8734	1	-17884
COG4	4	0.011163	0.0039239	0.039326	1104	3	-32742	0.90084	0.95066	1.0	17148	0	-32742
TMEM261	4	0.011163	0.0039239	0.039326	1105	4	-36923	0.98756	0.99999	1.0	18635	0	-36923
H3F3B	4	0.011163	0.0039239	0.039326	1106	3	-28622	0.10049	0.10212	0.514136	3507	1	-28622
TESPA1	4	0.011163	0.0039239	0.039326	1107	4	-38662	0.97626	0.99987	1.0	18397	0	-38662
C14orf169	4	0.011163	0.0039239	0.039326	1108	3	-2432	0.92028	0.97182	1.0	17478	0	-2432
OR51F1	4	0.011306	0.0039244	0.039326	1109	4	-41541	0.98869	0.99999	1.0	18676	0	-41541
KRT6B	4	0.011306	0.0039244	0.039326	1110	4	-47475	0.98869	0.99999	1.0	18674	0	-47475
ZNF275	4	0.011306	0.0039244	0.039326	1111	4	-4793	0.98869	0.99999	1.0	18670	0	-4793
COA6	4	0.011306	0.0039244	0.039326	1112	4	-44776	0.98869	0.99999	1.0	18673	0	-44776
HLA-G	4	0.011306	0.0039244	0.039326	1113	4	-46392	0.98869	0.99999	1.0	18671	0	-46392
EPO	4	0.011306	0.0039244	0.039326	1114	4	-48463	0.98869	0.99999	1.0	18672	0	-48463
CNTNAP3B	4	0.011521	0.0039244	0.039326	1115	4	-37782	0.98848	0.99999	1.0	18668	0	-37782
NAP1L3	4	0.011521	0.0039244	0.039326	1116	4	-50326	0.98848	0.99999	1.0	18663	0	-50326
ARHGAP33	4	0.011521	0.0039244	0.039326	1117	4	-45877	0.98848	0.99999	1.0	18660	0	-45877
ODC1	4	0.011521	0.0039244	0.039326	1118	4	-48724	0.98848	0.99999	1.0	18665	0	-48724
VAV2	4	0.011521	0.0039244	0.039326	1119	4	-49418	0.98848	0.99999	1.0	18669	0	-49418
KRCC1	4	0.011521	0.0039244	0.039326	1120	4	-49161	0.98848	0.99999	1.0	18667	0	-49161
NPTN	4	0.011521	0.0039244	0.039326	1121	4	-4591	0.98848	0.99999	1.0	18664	0	-4591
HINT2	4	0.011752	0.0039244	0.039326	1122	4	-49458	0.98825	0.99999	1.0	18657	0	-49458
LIMK1	4	0.011752	0.0039244	0.039326	1123	4	-47814	0.98825	0.99999	1.0	18653	0	-47814
HSPB6	4	0.011752	0.0039244	0.039326	1124	4	-41843	0.98825	0.99999	1.0	18651	0	-41843
ATXN10	4	0.011752	0.0039244	0.039326	1125	4	-48247	0.98825	0.99999	1.0	18654	0	-48247
GNAL	4	0.011752	0.0039244	0.039326	1126	4	-44863	0.98825	0.99999	1.0	18656	0	-44863
MRPL51	4	0.011752	0.0039244	0.039326	1127	4	-48604	0.98825	0.99999	1.0	18652	0	-48604
ATIC	4	0.011752	0.0039244	0.039326	1128	4	-44949	0.98825	0.99999	1.0	18659	0	-44949
NHP2L1	4	0.011916	0.0039244	0.039326	1129	3	-23321	0.3599	0.29921	0.693524	8230	1	-23321
JAZF1	4	0.011916	0.0039244	0.039326	1130	3	-26707	0.84523	0.87209	1.0	16142	0	-26707
NDUFC2	4	0.011916	0.0039244	0.039326	1131	3	-25745	0.77299	0.75283	0.971934	14786	0	-25745
CFAP36	4	0.011916	0.0039244	0.039326	1132	2	-12978	0.93313	0.98138	1.0	17717	0	-12978
DNAJC16	4	0.011916	0.0039244	0.039326	1133	3	-27556	0.64025	0.56234	0.879138	12134	1	-27556
STK17A	4	0.011916	0.0039244	0.039326	1134	3	-28667	0.8628	0.9023	1.0	16471	0	-28667
L2HGDH	4	0.011916	0.0039244	0.039326	1135	3	-24007	0.90479	0.95607	1.0	17215	0	-24007
PRPF4B	4	0.011916	0.0039244	0.039326	1136	2	0.39775	0.10338	0.10504	0.514136	3579	1	0.39775
GLT6D1	4	0.011916	0.0039244	0.039326	1137	2	-0.79698	0.4977	0.38827	0.74264	9908	1	-0.79698
OXER1	4	0.011916	0.0039244	0.039326	1138	3	-28667	0.75017	0.71576	0.950193	14338	0	-28667
C19orf52	4	0.011916	0.0039244	0.039326	1139	3	-28667	0.42356	0.33865	0.719007	8947	1	-28667
NES	4	0.011916	0.0039244	0.039326	1140	3	-14316	0.7813	0.77065	0.986468	14931	0	-14316
USP36	4	0.011916	0.0039244	0.039326	1141	3	-12581	0.67692	0.60598	0.899677	12848	1	-12581
OR5A2	4	0.011916	0.0039244	0.039326	1142	3	-29003	0.92058	0.97182	1.0	17483	0	-29003
PLEKHM2	4	0.011916	0.0039244	0.039326	1143	3	-27556	0.57079	0.45143	0.783395	10997	1	-27556
ITK	4	0.011916	0.0039244	0.039326	1144	3	-24966	0.47411	0.37637	0.738265	9601	1	-24966
FAM195A	4	0.011916	0.0039244	0.039326	1145	3	-17933	0.056237	0.069094	0.514136	2431	1	-17933
PRH2	4	0.011916	0.0039244	0.039326	1146	2	-0.84964	0.37891	0.313	0.706959	8449	1	-0.84964
FTO	4	0.011916	0.0039244	0.039326	1147	3	-29003	0.024792	0.025872	0.373704	1290	1	-29003
POU3F1	4	0.011916	0.0039244	0.039326	1148	3	-26707	0.88885	0.93514	1.0	16950	0	-26707
HSPB2	4	0.011916	0.0039244	0.039326	1149	3	-26707	0.13658	0.12697	0.555184	4361	1	-26707
ALDH16A1	4	0.011916	0.0039244	0.039326	1150	2	-10668	0.75425	0.7173	0.950193	14426	0	-10668
HCFC1R1	4	0.011916	0.0039244	0.039326	1151	2	0.30398	0.18014	0.1648	0.579908	5381	2	0.30398
NAA60	4	0.011916	0.0039244	0.039326	1152	4	-35992	0.98577	0.99998	1.0	18590	0	-35992
STEAP4	4	0.011985	0.0039249	0.039326	1153	4	-46364	0.98802	0.99999	1.0	18647	0	-46364
IPCEF1	4	0.011985	0.0039249	0.039326	1154	4	-48462	0.98802	0.99999	1.0	18648	0	-48462
HELB	4	0.011985	0.0039249	0.039326	1155	4	-43838	0.98802	0.99999	1.0	18649	0	-43838
CT47A6	4	0.01203	0.0039254	0.039326	1156	4	-36857	0.98458	0.99998	1.0	18553	0	-36857
UTF1	4	0.01203	0.0039254	0.039326	1157	3	-24233	0.92806	0.97626	1.0	17619	0	-24233
EPS8L1	4	0.01203	0.0039254	0.039326	1158	3	-3184	0.72735	0.66948	0.918738	13883	0	-3184
H2AFB2	4	0.01203	0.0039254	0.039326	1159	3	-3634	0.71548	0.66069	0.918738	13613	0	-3634
AQR	4	0.01203	0.0039254	0.039326	1160	3	-34903	0.6128	0.50495	0.827013	11658	1	-34903
ICOSLG	4	0.01203	0.0039254	0.039326	1161	4	-34782	0.9749	0.99984	1.0	18377	0	-34782
TAS1R1	4	0.01203	0.0039254	0.039326	1162	3	-3.4	0.91125	0.96288	1.0	17332	0	-3.4
POLR2H	4	0.01203	0.0039254	0.039326	1163	4	-35894	0.97535	0.99985	1.0	18385	0	-35894
CLCF1	4	0.01203	0.0039254	0.039326	1164	3	-21795	0.65198	0.57429	0.884933	12356	1	-21795
DNAH17	4	0.01203	0.0039254	0.039326	1165	3	-2188	0.91203	0.96388	1.0	17348	0	-2188
ADGRE5	4	0.01203	0.0039254	0.039326	1166	3	-29102	0.092547	0.097811	0.514136	3301	1	-29102
CDCA5	4	0.01203	0.0039254	0.039326	1167	3	-30135	0.91351	0.96581	1.0	17369	0	-30135
GRIA2	4	0.012203	0.0039262	0.039326	1168	4	-43186	0.9878	0.99999	1.0	18638	0	-43186
ARHGAP4	4	0.012203	0.0039262	0.039326	1169	4	-49816	0.9878	0.99999	1.0	18641	0	-49816
RAPGEF6	4	0.012203	0.0039262	0.039326	1170	4	-45945	0.9878	0.99999	1.0	18643	0	-45945
FOXJ2	4	0.012203	0.0039262	0.039326	1171	4	-39037	0.9878	0.99999	1.0	18645	0	-39037
PNISR	4	0.012203	0.0039262	0.039326	1172	4	-44293	0.9878	0.99999	1.0	18642	0	-44293
EGLN3	4	0.012203	0.0039262	0.039326	1173	4	-4648	0.9878	0.99999	1.0	18639	0	-4648
SMAD7	4	0.012203	0.0039262	0.039326	1174	4	-41691	0.9878	0.99999	1.0	18644	0	-41691
SLC2A9	4	0.012203	0.0039262	0.039326	1175	4	-47272	0.9878	0.99999	1.0	18646	0	-47272
IL21	4	0.012203	0.0039262	0.039326	1176	4	-41855	0.9878	0.99999	1.0	18637	0	-41855
UFM1	4	0.012436	0.003927	0.039326	1177	4	-47897	0.98756	0.99999	1.0	18636	0	-47897
ATP8B2	4	0.012436	0.003927	0.039326	1178	4	-44393	0.98756	0.99999	1.0	18632	0	-44393
SRRT	4	0.012436	0.003927	0.039326	1179	4	-45695	0.98756	0.99999	1.0	18633	0	-45695
DTNBP1	4	0.012668	0.003927	0.039326	1180	4	-48931	0.98733	0.99999	1.0	18631	0	-48931
DDIAS	4	0.012668	0.003927	0.039326	1181	4	-47743	0.98733	0.99999	1.0	18627	0	-47743
LGMN	4	0.012668	0.003927	0.039326	1182	4	-41962	0.98733	0.99999	1.0	18625	0	-41962
ARL3	4	0.012668	0.003927	0.039326	1183	4	-50166	0.98733	0.99999	1.0	18628	0	-50166
ZBTB5	4	0.012668	0.003927	0.039326	1184	4	-43838	0.98733	0.99999	1.0	18629	0	-43838
DHRS4	4	0.012668	0.003927	0.039326	1185	4	-40804	0.98733	0.99999	1.0	18630	0	-40804
C7orf69	4	0.012871	0.0039278	0.039326	1186	4	-39055	0.98713	0.99999	1.0	18623	0	-39055
TRPM8	4	0.012871	0.0039278	0.039326	1187	4	-42904	0.98713	0.99999	1.0	18624	0	-42904
SNX22	4	0.012871	0.0039278	0.039326	1188	4	-45668	0.98713	0.99999	1.0	18621	0	-45668
C12orf60	4	0.012871	0.0039278	0.039326	1189	4	-48657	0.98713	0.99999	1.0	18622	0	-48657
TM7SF2	4	0.012952	0.003928	0.039326	1190	3	-31219	0.39847	0.32295	0.710377	8670	1	-31219
TMEM239	4	0.012952	0.003928	0.039326	1191	3	-33234	0.86816	0.90983	1.0	16571	0	-33234
SLC35D2	4	0.012952	0.003928	0.039326	1192	3	-17329	0.44028	0.35447	0.738265	9144	1	-17329
RPS6KA4	4	0.012952	0.003928	0.039326	1193	3	-21405	0.66308	0.59012	0.894681	12568	1	-21405
BZRAP1	4	0.012952	0.003928	0.039326	1194	3	-34021	0.26788	0.2734	0.692063	7207	1	-34021
METTL15	4	0.012952	0.003928	0.039326	1195	3	-35733	0.10049	0.10212	0.514136	3506	1	-35733
DDX60	4	0.012952	0.003928	0.039326	1196	3	-34984	0.71956	0.66244	0.918738	13696	0	-34984
RASD1	4	0.012952	0.003928	0.039326	1197	3	-29471	0.91809	0.96954	1.0	17441	0	-29471
PRR23C	4	0.012952	0.003928	0.039326	1198	4	-39625	0.97253	0.99969	1.0	18342	0	-39625
AEBP2	4	0.012952	0.003928	0.039326	1199	3	-31176	0.55173	0.43382	0.768953	10706	1	-31176
NIM1K	4	0.012952	0.003928	0.039326	1200	3	-32114	0.18041	0.1648	0.579908	5385	1	-32114
CXorf21	4	0.012952	0.003928	0.039326	1201	3	-32287	0.063388	0.071612	0.514136	2601	1	-32287
MED25	4	0.012952	0.003928	0.039326	1202	3	-30467	0.12481	0.112	0.520651	4083	1	-30467
NOP56	4	0.012952	0.003928	0.039326	1203	3	-35324	0.69586	0.63499	0.916127	13230	0	-35324
DEGS2	4	0.012952	0.003928	0.039326	1204	4	-30973	0.96156	0.99774	1.0	18168	0	-30973
PHF13	4	0.012952	0.003928	0.039326	1205	3	-25426	0.86924	0.91147	1.0	16589	0	-25426
SUCLA2	4	0.012952	0.003928	0.039326	1206	3	-16072	0.37196	0.30913	0.704374	8366	1	-16072
TRIM77	4	0.012952	0.003928	0.039326	1207	3	-30984	0.93838	0.98492	1.0	17807	0	-30984
CT47A1	4	0.012952	0.003928	0.039326	1208	3	-26749	0.331	0.28922	0.692063	7890	1	-26749
ACSS3	4	0.012952	0.003928	0.039326	1209	3	-14549	0.92571	0.97526	1.0	17581	0	-14549
GAA	4	0.012952	0.003928	0.039326	1210	3	-34286	0.080408	0.086094	0.514136	3001	1	-34286
CSTA	4	0.012952	0.003928	0.039326	1211	4	-36314	0.94292	0.98761	1.0	17871	0	-36314
MED19	4	0.012952	0.003928	0.039326	1212	4	-31546	0.94964	0.99265	1.0	17980	0	-31546
ADCYAP1	4	0.012952	0.003928	0.039326	1213	3	-32554	0.19222	0.17624	0.591552	5668	1	-32554
SLCO1B7	4	0.012952	0.003928	0.039326	1214	4	-39932	0.97264	0.9997	1.0	18344	0	-39932
UNC93B1	4	0.012952	0.003928	0.039326	1215	3	-29525	0.89171	0.93899	1.0	16996	0	-29525
C11orf85	4	0.012952	0.003928	0.039326	1216	3	-3712	0.11656	0.10681	0.514136	3883	1	-3712
CHST6	4	0.013077	0.0039309	0.039326	1217	4	-44734	0.98692	0.99999	1.0	18620	0	-44734
CCDC42	4	0.013077	0.0039309	0.039326	1218	4	-45018	0.98692	0.99999	1.0	18619	0	-45018
SLC24A2	4	0.013077	0.0039309	0.039326	1219	4	-4463	0.98692	0.99999	1.0	18618	0	-4463
PHGR1	4	0.013276	0.0039332	0.039326	1220	4	-41219	0.98672	0.99998	1.0	18614	0	-41219
P4HTM	4	0.013276	0.0039332	0.039326	1221	4	-42781	0.98672	0.99998	1.0	18609	0	-42781
VSX1	4	0.013276	0.0039332	0.039326	1222	4	-50007	0.98672	0.99998	1.0	18616	0	-50007
CDH7	4	0.013276	0.0039332	0.039326	1223	4	-41271	0.98672	0.99998	1.0	18610	0	-41271
ESYT2	4	0.013276	0.0039332	0.039326	1224	4	-49142	0.98672	0.99998	1.0	18612	0	-49142
SECISBP2L	4	0.013276	0.0039332	0.039326	1225	4	-45054	0.98672	0.99998	1.0	18613	0	-45054
PLCH2	4	0.013475	0.0039337	0.039326	1226	4	-50993	0.98652	0.99998	1.0	18606	0	-50993
GCC1	4	0.013475	0.0039337	0.039326	1227	4	-3719	0.98652	0.99998	1.0	18602	0	-3719
GDF5	4	0.013475	0.0039337	0.039326	1228	4	-39229	0.98652	0.99998	1.0	18604	0	-39229
RP1	4	0.013475	0.0039337	0.039326	1229	4	-39612	0.98652	0.99998	1.0	18601	0	-39612
SNX15	4	0.013475	0.0039337	0.039326	1230	4	-43211	0.98652	0.99998	1.0	18603	0	-43211
SMYD5	4	0.013475	0.0039337	0.039326	1231	4	-51517	0.98652	0.99998	1.0	18605	0	-51517
LEPR	4	0.013668	0.0039337	0.039326	1232	4	-4416	0.98633	0.99998	1.0	18600	0	-4416
DSTYK	4	0.013668	0.0039337	0.039326	1233	4	-45657	0.98633	0.99998	1.0	18599	0	-45657
PI4K2B	4	0.013849	0.0039342	0.039326	1234	4	-40059	0.98615	0.99998	1.0	18597	0	-40059
GSN	4	0.013849	0.0039342	0.039326	1235	4	-44734	0.98615	0.99998	1.0	18598	0	-44734
KIAA1586	4	0.013886	0.0039342	0.039326	1236	3	-28253	0.081063	0.086094	0.514136	3015	1	-28253
RNASEH1	4	0.013886	0.0039342	0.039326	1237	4	-38436	0.98458	0.99998	1.0	18557	0	-38436
MRPL24	4	0.013886	0.0039342	0.039326	1238	2	-12055	0.569	0.45143	0.783395	10969	1	-12055
THOP1	4	0.013886	0.0039342	0.039326	1239	2	-1059	0.85006	0.88122	1.0	16240	0	-1059
ANAPC13	4	0.013886	0.0039342	0.039326	1240	2	-0.1096	0.13034	0.12011	0.53667	4214	2	-0.1096
DEAF1	4	0.013886	0.0039342	0.039326	1241	3	-24941	0.6621	0.59012	0.894681	12546	1	-24941
SAR1B	4	0.013886	0.0039342	0.039326	1242	3	-29309	0.74891	0.71421	0.950193	14305	0	-29309
CCDC167	4	0.013886	0.0039342	0.039326	1243	3	-29309	0.34803	0.29525	0.692063	8098	1	-29309
NKAP	4	0.013886	0.0039342	0.039326	1244	2	-0.18595	0.27521	0.2734	0.692063	7286	1	-0.18595
IGFBP6	4	0.013886	0.0039342	0.039326	1245	3	-27014	0.75345	0.7173	0.950193	14409	0	-27014
PRDM13	4	0.013886	0.0039342	0.039326	1246	2	-0.65775	0.44812	0.36444	0.738265	9249	1	-0.65775
PHB	4	0.013886	0.0039342	0.039326	1247	3	-28622	0.93175	0.98035	1.0	17690	0	-28622
CACNG8	4	0.013886	0.0039342	0.039326	1248	3	-28622	0.86129	0.9009	1.0	16441	0	-28622
NPIPB6	4	0.013886	0.0039342	0.039326	1249	3	-28974	0.051331	0.068462	0.514136	2308	1	-28974
SIKE1	4	0.013886	0.0039342	0.039326	1250	2	-10129	0.65976	0.59012	0.894681	12502	1	-10129
PFDN6	4	0.013886	0.0039342	0.039326	1251	2	-0.45766	0.53929	0.421	0.762264	10517	1	-0.45766
KIAA2012	4	0.013886	0.0039342	0.039326	1252	3	-28622	0.055915	0.069093	0.514136	2420	1	-28622
RPL37	4	0.013886	0.0039342	0.039326	1253	3	-26549	0.50836	0.39422	0.745076	10062	1	-26549
TMOD2	4	0.013886	0.0039342	0.039326	1254	4	-27014	0.96853	0.99919	1.0	18279	0	-27014
CDH8	4	0.013886	0.0039342	0.039326	1255	2	-0.47349	0.20448	0.19577	0.628709	5934	2	-0.47349
COX19	4	0.013886	0.0039342	0.039326	1256	3	-29309	0.20178	0.18952	0.612983	5865	1	-29309
YPEL3	4	0.013886	0.0039342	0.039326	1257	2	-0.45542	0.12696	0.11325	0.523771	4128	2	-0.45542
CDC25B	4	0.013886	0.0039342	0.039326	1258	3	-29309	0.91339	0.96549	1.0	17367	0	-29309
DIMT1	4	0.013886	0.0039342	0.039326	1259	2	-0.20102	0.24854	0.25999	0.692063	6941	2	-0.20102
DIRAS2	4	0.013886	0.0039342	0.039326	1260	3	-26549	0.062797	0.071224	0.514136	2586	1	-26549
HHLA2	4	0.013886	0.0039342	0.039326	1261	3	-24615	0.29177	0.27934	0.692063	7464	1	-24615
PLA2G12B	4	0.013886	0.0039342	0.039326	1262	3	-29937	0.85924	0.89807	1.0	16405	0	-29937
NUP205	4	0.013886	0.0039342	0.039326	1263	2	-0.97385	0.84433	0.87123	1.0	16125	0	-0.97385
DAGLA	4	0.013886	0.0039342	0.039326	1264	4	-26052	0.96114	0.99767	1.0	18159	0	-26052
PIGS	4	0.013886	0.0039342	0.039326	1265	2	-10752	0.46323	0.37637	0.738265	9447	1	-10752
PSMA6	4	0.013886	0.0039342	0.039326	1266	2	0.67099	0.0089059	0.0059103	0.195504	557	2	0.67099
DNAJB13	4	0.013886	0.0039342	0.039326	1267	3	-25518	0.86746	0.90779	1.0	16551	0	-25518
CCDC168	4	0.013886	0.0039342	0.039326	1268	4	-14805	0.9508	0.99331	1.0	17997	0	-14805
RRP1	4	0.013886	0.0039342	0.039326	1269	2	0.11308	0.0069035	0.0047443	0.191822	453	2	0.11308
PLA2G4F	4	0.013886	0.0039342	0.039326	1270	3	-22869	0.33024	0.28922	0.692063	7881	1	-22869
QTRT1	4	0.013886	0.0039342	0.039326	1271	4	-29937	0.95217	0.99413	1.0	18017	0	-29937
CNKSR2	4	0.013886	0.0039342	0.039326	1272	3	-18639	0.37617	0.31108	0.706045	8412	1	-18639
RGS16	4	0.013886	0.0039342	0.039326	1273	3	-24314	0.76087	0.731	0.95627	14551	0	-24314
GOLGA6L10	4	0.013886	0.0039342	0.039326	1274	3	-27108	0.34838	0.29525	0.692063	8100	1	-27108
SOD1	4	0.013902	0.0039348	0.039326	1275	3	-30087	0.76106	0.731	0.95627	14556	0	-30087
DDX11	4	0.013902	0.0039348	0.039326	1276	3	-14961	0.77093	0.74563	0.96615	14740	0	-14961
RABGEF1	4	0.013902	0.0039348	0.039326	1277	4	-26882	0.96627	0.99879	1.0	18249	0	-26882
RRS1	4	0.013902	0.0039348	0.039326	1278	3	-33082	0.6584	0.59012	0.894681	12472	1	-33082
TFEB	4	0.013902	0.0039348	0.039326	1279	3	-34718	0.57517	0.46044	0.791716	11054	1	-34718
LRRC37A3	4	0.013902	0.0039348	0.039326	1280	3	-2538	0.3381	0.29326	0.692063	7971	1	-2538
ZMAT3	4	0.013902	0.0039348	0.039326	1281	3	-27015	0.028436	0.028809	0.374832	1438	1	-27015
SRSF9	4	0.013902	0.0039348	0.039326	1282	3	-39001	0.74327	0.70292	0.944753	14186	0	-39001
SYTL3	4	0.013902	0.0039348	0.039326	1283	3	-3281	0.34838	0.29525	0.692063	8104	1	-3281
ZNF614	4	0.013902	0.0039348	0.039326	1284	4	-32123	0.95651	0.99599	1.0	18087	0	-32123
NDUFS2	4	0.013902	0.0039348	0.039326	1285	3	-29227	0.53622	0.41595	0.757522	10467	1	-29227
GP1BB	4	0.013902	0.0039348	0.039326	1286	3	-3291	0.42787	0.33865	0.719007	9001	1	-3291
SEH1L	4	0.013902	0.0039348	0.039326	1287	3	-20535	0.31553	0.28721	0.692063	7716	1	-20535
ADAM33	4	0.013902	0.0039348	0.039326	1288	3	-33099	0.84512	0.87209	1.0	16139	0	-33099
FEM1B	4	0.013902	0.0039348	0.039326	1289	3	-32359	0.74525	0.7061	0.947569	14241	0	-32359
UPK1B	4	0.013902	0.0039348	0.039326	1290	3	-35252	0.61818	0.51487	0.835816	11749	1	-35252
B4GALT1	4	0.014035	0.0039353	0.039326	1291	4	-44303	0.98597	0.99998	1.0	18594	0	-44303
ABCC5	4	0.014035	0.0039353	0.039326	1292	4	-40996	0.98597	0.99998	1.0	18596	0	-40996
PIK3CD	4	0.014035	0.0039353	0.039326	1293	4	-42229	0.98597	0.99998	1.0	18595	0	-42229
PRSS48	4	0.014231	0.0039363	0.039326	1294	4	-43202	0.98577	0.99998	1.0	18588	0	-43202
C5orf51	4	0.014231	0.0039363	0.039326	1295	4	-4.31	0.98577	0.99998	1.0	18591	0	-4.31
MLH3	4	0.014231	0.0039363	0.039326	1296	4	-50862	0.98577	0.99998	1.0	18587	0	-50862
TCEA2	4	0.014231	0.0039363	0.039326	1297	4	-45153	0.98577	0.99998	1.0	18592	0	-45153
NCOA1	4	0.014231	0.0039363	0.039326	1298	4	-47114	0.98577	0.99998	1.0	18593	0	-47114
SH3GL2	4	0.014231	0.0039363	0.039326	1299	4	-42301	0.98577	0.99998	1.0	18589	0	-42301
ZFYVE21	4	0.014231	0.0039363	0.039326	1300	4	-49858	0.98577	0.99998	1.0	18586	0	-49858
IRS2	4	0.014444	0.0039373	0.039326	1301	4	-37217	0.98556	0.99998	1.0	18581	0	-37217
RFT1	4	0.014444	0.0039373	0.039326	1302	4	-47136	0.98556	0.99998	1.0	18585	0	-47136
CWC27	4	0.014444	0.0039373	0.039326	1303	4	-43616	0.98556	0.99998	1.0	18584	0	-43616
PDE2A	4	0.014444	0.0039373	0.039326	1304	4	-52461	0.98556	0.99998	1.0	18582	0	-52461
SPAG16	4	0.014655	0.0039384	0.039326	1305	4	-42301	0.98534	0.99998	1.0	18579	0	-42301
OR7D4	4	0.014655	0.0039384	0.039326	1306	4	-48093	0.98534	0.99998	1.0	18578	0	-48093
FCGR3B	4	0.014655	0.0039384	0.039326	1307	4	-44773	0.98534	0.99998	1.0	18577	0	-44773
RND3	4	0.014655	0.0039384	0.039326	1308	4	-4518	0.98534	0.99998	1.0	18576	0	-4518
KHK	4	0.01487	0.0039399	0.039326	1309	4	-42109	0.98513	0.99998	1.0	18573	0	-42109
MYADM	4	0.01487	0.0039399	0.039326	1310	4	-42391	0.98513	0.99998	1.0	18572	0	-42391
THEM6	4	0.01487	0.0039399	0.039326	1311	4	-41266	0.98513	0.99998	1.0	18575	0	-41266
MKX	4	0.01487	0.0039399	0.039326	1312	4	-25743	0.98311	0.99997	1.0	18518	0	-25743
HOXB9	4	0.01487	0.0039399	0.039326	1313	3	-2931	0.54933	0.43084	0.768953	10672	1	-2931
HHATL	4	0.01487	0.0039399	0.039326	1314	4	-37294	0.94499	0.98981	1.0	17907	0	-37294
UFC1	4	0.01487	0.0039399	0.039326	1315	3	-1315	0.67369	0.60402	0.899677	12780	1	-1315
DICER1	4	0.01487	0.0039399	0.039326	1316	3	-36309	0.63083	0.55054	0.87821	11962	1	-36309
NPIPA1	4	0.01487	0.0039399	0.039326	1317	3	-39288	0.53589	0.41595	0.757522	10461	1	-39288
PSMC4	4	0.01487	0.0039399	0.039326	1318	3	-21795	0.49348	0.38428	0.74264	9865	1	-21795
ZNF543	4	0.01487	0.0039399	0.039326	1319	3	-1933	0.73674	0.68313	0.926953	14075	0	-1933
CFP	4	0.01487	0.0039399	0.039326	1320	3	-32861	0.72538	0.66599	0.918738	13838	0	-32861
TXLNA	4	0.01487	0.0039399	0.039326	1321	3	-33057	0.69344	0.63312	0.914885	13173	0	-33057
KAT8	4	0.01487	0.0039399	0.039326	1322	3	-29939	0.32987	0.28922	0.692063	7876	1	-29939
PPIAL4E	4	0.015062	0.0039407	0.039326	1323	4	-24753	0.98494	0.99998	1.0	18566	0	-24753
AHNAK2	4	0.015062	0.0039407	0.039326	1324	4	-4172	0.98494	0.99998	1.0	18565	0	-4172
CTDNEP1	4	0.015062	0.0039407	0.039326	1325	4	-45949	0.98494	0.99998	1.0	18571	0	-45949
CTHRC1	4	0.015062	0.0039407	0.039326	1326	4	-52353	0.98494	0.99998	1.0	18569	0	-52353
ADCY4	4	0.015062	0.0039407	0.039326	1327	4	-46448	0.98494	0.99998	1.0	18567	0	-46448
PPP2R2C	4	0.015062	0.0039407	0.039326	1328	4	-47154	0.98494	0.99998	1.0	18568	0	-47154
SESTD1	4	0.015229	0.0039415	0.039326	1329	4	-49351	0.98477	0.99998	1.0	18561	0	-49351
KIF3A	4	0.015229	0.0039415	0.039326	1330	4	-39616	0.98477	0.99998	1.0	18560	0	-39616
CHP2	4	0.015229	0.0039415	0.039326	1331	4	-47656	0.98477	0.99998	1.0	18559	0	-47656
ZAP70	4	0.015229	0.0039415	0.039326	1332	4	-50625	0.98477	0.99998	1.0	18564	0	-50625
ADAM30	4	0.015229	0.0039415	0.039326	1333	4	-4324	0.98477	0.99998	1.0	18562	0	-4324
LTB	4	0.015229	0.0039415	0.039326	1334	4	-45006	0.98477	0.99998	1.0	18563	0	-45006
SLC35G4	4	0.015421	0.0039415	0.039326	1335	4	-45736	0.98458	0.99998	1.0	18552	0	-45736
MAOA	4	0.015421	0.0039415	0.039326	1336	4	-47886	0.98458	0.99998	1.0	18554	0	-47886
SLX4IP	4	0.015421	0.0039415	0.039326	1337	4	-50164	0.98458	0.99998	1.0	18556	0	-50164
FAM160B2	4	0.015421	0.0039415	0.039326	1338	4	-48118	0.98458	0.99998	1.0	18555	0	-48118
CLASP2	4	0.015558	0.0039415	0.039326	1339	4	-2544	0.98444	0.99998	1.0	18551	0	-2544
LUZP4	4	0.015558	0.0039415	0.039326	1340	4	-45577	0.98444	0.99998	1.0	18550	0	-45577
C9orf64	4	0.015577	0.0039415	0.039326	1341	4	-36371	0.98442	0.99998	1.0	18549	0	-36371
SLC9A9	4	0.015659	0.003942	0.039326	1342	4	-42128	0.98434	0.99998	1.0	18547	0	-42128
AIMP2	4	0.015704	0.003942	0.039326	1343	4	-38295	0.9843	0.99998	1.0	18545	0	-38295
LHX2	4	0.015724	0.003942	0.039326	1344	4	-46815	0.98428	0.99998	1.0	18544	0	-46815
KCNJ13	4	0.01583	0.003942	0.039326	1345	4	-50829	0.98417	0.99998	1.0	18538	0	-50829
KCNT2	4	0.01583	0.003942	0.039326	1346	4	-41516	0.98417	0.99998	1.0	18542	0	-41516
CCL25	4	0.01583	0.003942	0.039326	1347	4	-42238	0.98417	0.99998	1.0	18541	0	-42238
CLVS2	4	0.01583	0.003942	0.039326	1348	4	-50516	0.98417	0.99998	1.0	18543	0	-50516
GGTLC2	4	0.015836	0.003942	0.039326	1349	3	-38511	0.56325	0.4397	0.771729	10873	1	-38511
MMP8	4	0.015836	0.003942	0.039326	1350	3	-39453	0.18179	0.16567	0.579908	5418	1	-39453
GTF3C2	4	0.015836	0.003942	0.039326	1351	3	-26388	0.262	0.2734	0.692063	7155	1	-26388
LEPROT	4	0.015836	0.003942	0.039326	1352	3	-1572	0.90214	0.95249	1.0	17170	0	-1572
CDS1	4	0.015836	0.003942	0.039326	1353	4	-36923	0.94696	0.99054	1.0	17937	0	-36923
BRAT1	4	0.015836	0.003942	0.039326	1354	3	-27311	0.87487	0.91747	1.0	16700	0	-27311
CD58	4	0.015836	0.003942	0.039326	1355	3	-37303	0.42719	0.33865	0.719007	8989	1	-37303
YY1	4	0.015836	0.003942	0.039326	1356	3	-34092	0.92576	0.97526	1.0	17582	0	-34092
DCAF13	4	0.015836	0.003942	0.039326	1357	3	-29365	0.92005	0.97182	1.0	17471	0	-29365
FRAT2	4	0.015836	0.003942	0.039326	1358	4	-36173	0.9568	0.99599	1.0	18097	0	-36173
NDUFC2-KCTD14	4	0.015836	0.003942	0.039326	1359	3	-27311	0.1063	0.10504	0.514136	3636	1	-27311
NR5A2	4	0.015836	0.003942	0.039326	1360	3	-34469	0.52066	0.40214	0.745076	10241	1	-34469
SAMD15	4	0.015836	0.003942	0.039326	1361	3	-31301	0.32987	0.28922	0.692063	7877	1	-31301
IL27RA	4	0.015836	0.003942	0.039326	1362	3	-35131	0.69378	0.63312	0.914885	13186	0	-35131
ZNF668	4	0.015909	0.003942	0.039326	1363	3	-23922	0.38648	0.31895	0.710033	8534	1	-23922
P2RX2	4	0.015909	0.003942	0.039326	1364	2	-0.21613	0.09195	0.097297	0.514136	3287	2	-0.21613
CBWD2	4	0.015909	0.003942	0.039326	1365	3	-27745	0.8606	0.9009	1.0	16430	0	-27745
C8orf44	4	0.015909	0.003942	0.039326	1366	2	-0.68282	0.72046	0.66244	0.918738	13721	0	-0.68282
ANKRD13A	4	0.015909	0.003942	0.039326	1367	3	-16489	0.92705	0.97526	1.0	17603	0	-16489
POLR1A	4	0.015909	0.003942	0.039326	1368	3	-28157	0.34645	0.29525	0.692063	8078	1	-28157
SRPK2	4	0.015909	0.003942	0.039326	1369	3	-28917	0.48445	0.37831	0.738265	9740	1	-28917
PJA1	4	0.015909	0.003942	0.039326	1370	4	-29268	0.96838	0.99919	1.0	18277	0	-29268
HYAL2	4	0.015909	0.003942	0.039326	1371	3	-28547	0.91645	0.96772	1.0	17412	0	-28547
POLA1	4	0.015909	0.003942	0.039326	1372	2	-0.34331	0.028891	0.029353	0.374832	1452	2	-0.34331
WDR74	4	0.015909	0.003942	0.039326	1373	3	-10924	0.36557	0.30523	0.703281	8294	1	-10924
KRT31	4	0.015909	0.003942	0.039326	1374	2	-0.44596	0.20516	0.19577	0.628709	5950	2	-0.44596
LIPC	4	0.015909	0.003942	0.039326	1375	3	-23922	0.14588	0.13367	0.55577	4557	1	-23922
MBTPS2	4	0.015909	0.003942	0.039326	1376	2	-0.32561	0.29242	0.27934	0.692063	7469	1	-0.32561
ZFYVE26	4	0.015909	0.003942	0.039326	1377	3	-30231	0.48827	0.37831	0.738265	9790	1	-30231
FAM107A	4	0.015909	0.003942	0.039326	1378	3	-14233	0.76031	0.72948	0.95627	14541	0	-14233
SHARPIN	4	0.015909	0.003942	0.039326	1379	3	-23181	0.72751	0.66948	0.918738	13889	0	-23181
IRF6	4	0.015909	0.003942	0.039326	1380	3	-18933	0.75323	0.7173	0.950193	14403	0	-18933
CD14	4	0.015909	0.003942	0.039326	1381	3	-26346	0.83148	0.85022	1.0	15901	0	-26346
LOC730183	4	0.015909	0.003942	0.039326	1382	3	-26346	0.062108	0.071224	0.514136	2576	1	-26346
PYDC1	4	0.015909	0.003942	0.039326	1383	2	-1075	0.14978	0.13915	0.556148	4652	1	-1075
CDK16	4	0.015909	0.003942	0.039326	1384	4	-30231	0.95461	0.99499	1.0	18058	0	-30231
SLC6A11	4	0.015909	0.003942	0.039326	1385	2	-0.22996	0.08828	0.093867	0.514136	3198	2	-0.22996
CTAG2	4	0.015909	0.003942	0.039326	1386	3	-29924	0.92291	0.97343	1.0	17534	0	-29924
CGB1	4	0.015909	0.003942	0.039326	1387	3	-0.63617	0.89624	0.94512	1.0	17085	0	-0.63617
DLG4	4	0.015909	0.003942	0.039326	1388	3	-30231	0.77472	0.75567	0.974666	14813	0	-30231
MGAT3	4	0.015909	0.003942	0.039326	1389	3	-29604	0.41066	0.33465	0.719007	8806	1	-29604
SOHLH1	4	0.015909	0.003942	0.039326	1390	2	-12862	0.089253	0.09479	0.514136	3227	1	-12862
VAMP4	4	0.015909	0.003942	0.039326	1391	2	-0.62637	0.73848	0.68822	0.931487	14103	0	-0.62637
NR2F2	4	0.015909	0.003942	0.039326	1392	3	-30231	0.77654	0.75981	0.977633	14849	0	-30231
HLA-DQA2	4	0.015909	0.003942	0.039326	1393	3	-27308	0.63334	0.5525	0.878408	12006	1	-27308
PTPRU	4	0.015935	0.003942	0.039326	1394	4	-39819	0.98406	0.99998	1.0	18537	0	-39819
UFD1L	4	0.015972	0.003942	0.039326	1395	4	-33929	0.98403	0.99998	1.0	18535	0	-33929
PARD6G	4	0.016099	0.0039428	0.039326	1396	4	-40781	0.9839	0.99998	1.0	18533	0	-40781
ZNF30	4	0.016099	0.0039428	0.039326	1397	4	-41739	0.9839	0.99998	1.0	18532	0	-41739
PNPLA1	4	0.016099	0.0039428	0.039326	1398	4	-37392	0.9839	0.99998	1.0	18534	0	-37392
MEOX2	4	0.016099	0.0039428	0.039326	1399	4	-43395	0.9839	0.99998	1.0	18531	0	-43395
C7orf57	4	0.016199	0.0039436	0.039326	1400	4	-3881	0.9838	0.99997	1.0	18530	0	-3881
NINJ1	4	0.016344	0.0039446	0.039326	1401	4	-48753	0.98366	0.99997	1.0	18528	0	-48753
MGLL	4	0.016465	0.0039451	0.039326	1402	4	-30327	0.98353	0.99997	1.0	18527	0	-30327
RIN2	4	0.016592	0.003948	0.039326	1403	4	-43483	0.98341	0.99997	1.0	18525	0	-43483
WDR78	4	0.016698	0.0039508	0.039326	1404	4	-37092	0.9833	0.99997	1.0	18524	0	-37092
MTRNR2L5	4	0.016792	0.0039513	0.039326	1405	4	-4334	0.98321	0.99997	1.0	18521	0	-4334
ICAM1	4	0.016792	0.0039513	0.039326	1406	4	-53382	0.98321	0.99997	1.0	18519	0	-53382
LRRC52	4	0.016792	0.0039513	0.039326	1407	4	-52077	0.98321	0.99997	1.0	18522	0	-52077
CFTR	4	0.016792	0.0039513	0.039326	1408	4	-4.33	0.98321	0.99997	1.0	18523	0	-4.33
FAM205A	4	0.016792	0.0039513	0.039326	1409	4	-44037	0.98321	0.99997	1.0	18520	0	-44037
MRPL43	4	0.016876	0.0039518	0.039326	1410	3	-17329	0.11616	0.10619	0.514136	3872	1	-17329
TSTD1	4	0.016876	0.0039518	0.039326	1411	3	-1888	0.79847	0.80311	1.0	15266	0	-1888
HIST1H1T	4	0.016876	0.0039518	0.039326	1412	3	-37551	0.64254	0.56234	0.879138	12180	1	-37551
PNRC2	4	0.016876	0.0039518	0.039326	1413	3	-25473	0.79858	0.80311	1.0	15268	0	-25473
MUC17	4	0.016876	0.0039518	0.039326	1414	3	-40369	0.38462	0.31695	0.710033	8511	1	-40369
STXBP5L	4	0.016876	0.0039518	0.039326	1415	3	-32306	0.70159	0.64623	0.918738	13344	0	-32306
PNPLA7	4	0.016876	0.0039518	0.039326	1416	3	-35894	0.69686	0.63686	0.916828	13254	0	-35894
NUP35	4	0.016876	0.0039518	0.039326	1417	3	-40806	0.85033	0.88163	1.0	16250	0	-40806
PKHD1	4	0.016876	0.0039518	0.039326	1418	4	-35778	0.95751	0.99618	1.0	18107	0	-35778
MTBP	4	0.016876	0.0039518	0.039326	1419	3	-13647	0.63374	0.5525	0.878408	12011	1	-13647
OPN1MW	4	0.016876	0.0039518	0.039326	1420	3	-34502	0.83654	0.86052	1.0	15990	0	-34502
EMC7	4	0.016876	0.0039518	0.039326	1421	3	-39761	0.19725	0.18162	0.600444	5773	1	-39761
LINGO3	4	0.016876	0.0039518	0.039326	1422	3	-21239	0.16828	0.15535	0.579908	5093	1	-21239
NUBP1	4	0.016876	0.0039518	0.039326	1423	3	-35512	0.87862	0.92339	1.0	16763	0	-35512
CELF1	4	0.016876	0.0039518	0.039326	1424	3	-38944	0.61168	0.49904	0.819166	11635	1	-38944
TRAPPC9	4	0.016876	0.0039518	0.039326	1425	4	-38492	0.94999	0.99283	1.0	17986	0	-38492
FUNDC2	4	0.016925	0.0039524	0.039326	1426	4	-41829	0.98308	0.99997	1.0	18516	0	-41829
HNRNPU	4	0.016925	0.0039524	0.039326	1427	4	-33122	0.98308	0.99997	1.0	18517	0	-33122
SLCO2A1	4	0.017031	0.0039526	0.039326	1428	4	-40475	0.98297	0.99997	1.0	18514	0	-40475
PAPLN	4	0.017031	0.0039526	0.039326	1429	4	-46927	0.98297	0.99997	1.0	18515	0	-46927
PLA2G2F	4	0.017137	0.0039529	0.039326	1430	4	-37826	0.98286	0.99997	1.0	18513	0	-37826
NOLC1	4	0.017166	0.0039529	0.039326	1431	2	0.8437	0.079807	0.086093	0.514136	2988	2	0.8437
CIR1	4	0.017166	0.0039529	0.039326	1432	2	-0.73946	0.78844	0.78242	0.990488	15058	0	-0.73946
ACAN	4	0.017166	0.0039529	0.039326	1433	2	-0.89297	0.67321	0.60202	0.899677	12773	1	-0.89297
DNAJB8	4	0.017166	0.0039529	0.039326	1434	2	-0.57205	0.6493	0.57229	0.884933	12301	1	-0.57205
WNT7A	4	0.017166	0.0039529	0.039326	1435	1	16111	0.044857	0.064456	0.514136	2104	3	16111
TAF15	4	0.017166	0.0039529	0.039326	1436	3	-0.98803	0.90054	0.94916	1.0	17144	0	-0.98803
P3H2	4	0.017166	0.0039529	0.039326	1437	3	-31551	0.75949	0.72872	0.95627	14522	0	-31551
PCK1	4	0.017166	0.0039529	0.039326	1438	2	0.27892	0.2365	0.25306	0.692063	6634	1	0.27892
TIE1	4	0.017166	0.0039529	0.039326	1439	2	0.95097	0.014772	0.01898	0.373704	830	2	0.95097
BTBD8	4	0.017166	0.0039529	0.039326	1440	2	0.11875	0.39703	0.32295	0.710377	8650	1	0.11875
TCF21	4	0.017166	0.0039529	0.039326	1441	3	-28015	0.083243	0.089491	0.514136	3067	1	-28015
PSRC1	4	0.017166	0.0039529	0.039326	1442	2	-0.10623	0.79204	0.78861	0.994282	15135	0	-0.10623
TRIM8	4	0.017166	0.0039529	0.039326	1443	3	-27715	0.90583	0.95684	1.0	17230	0	-27715
OR11A1	4	0.017166	0.0039529	0.039326	1444	3	-32714	0.25012	0.26373	0.692063	6971	1	-32714
CSF1	4	0.017166	0.0039529	0.039326	1445	1	0.70453	0.06496	0.075046	0.514136	2633	1	0.70453
ARG1	4	0.017166	0.0039529	0.039326	1446	3	-3089	0.6525	0.57429	0.884933	12363	1	-3089
DDT	4	0.017166	0.0039529	0.039326	1447	3	-29941	0.6596	0.59012	0.894681	12496	1	-29941
SHISA7	4	0.017166	0.0039529	0.039326	1448	3	-10917	0.091826	0.097297	0.514136	3285	1	-10917
MAFK	4	0.017166	0.0039529	0.039326	1449	2	-0.23224	0.28386	0.27738	0.692063	7385	1	-0.23224
RBKS	4	0.017166	0.0039529	0.039326	1450	2	-0.015581	0.59243	0.47531	0.799425	11331	1	-0.015581
PDCD2	4	0.017166	0.0039529	0.039326	1451	2	0.8104	0.012347	0.011077	0.294475	710	2	0.8104
C16orf70	4	0.017166	0.0039529	0.039326	1452	2	-0.52719	0.75435	0.7173	0.950193	14428	0	-0.52719
RHOH	4	0.017166	0.0039529	0.039326	1453	3	-10152	0.69646	0.63499	0.916127	13245	0	-10152
EEF1B2	4	0.017166	0.0039529	0.039326	1454	3	-3069	0.064346	0.072014	0.514136	2622	1	-3069
HSD17B10	4	0.017166	0.0039529	0.039326	1455	2	-0.18541	0.45249	0.36444	0.738265	9309	1	-0.18541
CRIPT	4	0.017166	0.0039529	0.039326	1456	3	-2756	0.46256	0.37637	0.738265	9440	1	-2756
EIF2AK1	4	0.017166	0.0039529	0.039326	1457	3	-31181	0.37565	0.31108	0.706045	8405	1	-31181
DKK4	4	0.017166	0.0039529	0.039326	1458	2	-0.21807	0.32055	0.28721	0.692063	7775	1	-0.21807
UNC45A	4	0.017166	0.0039529	0.039326	1459	4	-29941	0.96073	0.99763	1.0	18155	0	-29941
LPPR2	4	0.017166	0.0039529	0.039326	1460	2	-0.81146	0.68133	0.61481	0.909177	12925	0	-0.81146
TMC2	4	0.017166	0.0039529	0.039326	1461	3	-29106	0.29559	0.27934	0.692063	7505	1	-29106
PARD3B	4	0.017166	0.0039529	0.039326	1462	2	-0.78389	0.74933	0.71421	0.950193	14317	0	-0.78389
TMEM211	4	0.017166	0.0039529	0.039326	1463	1	12481	0.30105	0.2852	0.692063	7558	1	12481
CKAP5	4	0.017166	0.0039529	0.039326	1464	2	0.07849	0.17772	0.16304	0.579908	5328	2	0.07849
SEMA4C	4	0.017166	0.0039529	0.039326	1465	2	-0.31303	0.79974	0.80311	1.0	15292	0	-0.31303
KIAA1143	4	0.017166	0.0039529	0.039326	1466	3	-25604	0.015074	0.019059	0.373704	842	1	-25604
LRRC3	4	0.017166	0.0039529	0.039326	1467	2	-0.60089	0.14754	0.13367	0.55577	4591	1	-0.60089
SLC35F4	4	0.017166	0.0039529	0.039326	1468	3	-31988	0.53716	0.41595	0.757522	10483	1	-31988
SPNS3	4	0.017166	0.0039529	0.039326	1469	3	-31988	0.030431	0.029928	0.374832	1510	1	-31988
TIGD1	4	0.017166	0.0039529	0.039326	1470	3	-3089	0.082226	0.086094	0.514136	3038	1	-3089
VWA3A	4	0.017166	0.0039529	0.039326	1471	3	-29712	0.83327	0.855	1.0	15933	0	-29712
FAM171B	4	0.017166	0.0039529	0.039326	1472	2	-0.22167	0.46229	0.37637	0.738265	9436	1	-0.22167
FBXO28	4	0.017166	0.0039529	0.039326	1473	3	-16235	0.49533	0.38624	0.74264	9885	1	-16235
MAL2	4	0.017166	0.0039529	0.039326	1474	3	-2673	0.84806	0.87627	1.0	16202	0	-2673
SLC17A3	4	0.017166	0.0039529	0.039326	1475	1	12314	0.067732	0.076174	0.514136	2703	2	12314
CCDC77	4	0.017166	0.0039529	0.039326	1476	2	0.04446	0.098081	0.09994	0.514136	3438	2	0.04446
IFNLR1	4	0.017166	0.0039529	0.039326	1477	2	0.60504	0.046487	0.065455	0.514136	2160	2	0.60504
MAP1LC3A	4	0.017166	0.0039529	0.039326	1478	1	39035	0.0010014	0.00079431	0.134203	101	3	39035
MRPL16	4	0.017166	0.0039529	0.039326	1479	3	-30588	0.23678	0.25429	0.692063	6644	1	-30588
NPIPB5	4	0.017166	0.0039529	0.039326	1480	2	-0.54488	0.31619	0.28721	0.692063	7726	1	-0.54488
GPX4	4	0.017166	0.0039529	0.039326	1481	1	19336	0.021645	0.02323	0.373704	1157	2	19336
ZNF200	4	0.017166	0.0039529	0.039326	1482	2	-0.13916	0.51159	0.39621	0.745076	10113	1	-0.13916
PTPRR	4	0.017166	0.0039529	0.039326	1483	3	-28848	0.80137	0.80664	1.0	15323	0	-28848
FAM53C	4	0.017166	0.0039529	0.039326	1484	4	-3876	0.97108	0.99951	1.0	18318	0	-3876
TSPAN17	4	0.017166	0.0039529	0.039326	1485	3	-25165	0.56525	0.44363	0.775712	10905	1	-25165
TFPI2	4	0.017166	0.0039529	0.039326	1486	3	-28304	0.50295	0.39022	0.74264	9987	1	-28304
PRAMEF20	4	0.017166	0.0039529	0.039326	1487	2	0.16374	0.19695	0.17919	0.594035	5765	2	0.16374
FGF10	4	0.017166	0.0039529	0.039326	1488	3	-3248	0.23416	0.24373	0.692063	6589	1	-3248
MSN	4	0.017166	0.0039529	0.039326	1489	2	-0.16531	0.58817	0.47135	0.799425	11261	1	-0.16531
CALHM3	4	0.017166	0.0039529	0.039326	1490	3	-0.70371	0.61307	0.50495	0.827013	11664	1	-0.70371
ACRV1	4	0.017166	0.0039529	0.039326	1491	4	-28978	0.95696	0.99611	1.0	18100	0	-28978
PTCHD1	4	0.017166	0.0039529	0.039326	1492	3	-23752	0.4704	0.37637	0.738265	9550	1	-23752
GUCA2A	4	0.017166	0.0039529	0.039326	1493	2	-0.69564	0.41639	0.33663	0.719007	8873	1	-0.69564
SUCLG2	4	0.017166	0.0039529	0.039326	1494	2	-0.057745	0.30568	0.2852	0.692063	7611	1	-0.057745
KLHL1	4	0.017166	0.0039529	0.039326	1495	4	-53224	0.97328	0.99974	1.0	18352	0	-53224
WDFY2	4	0.017166	0.0039529	0.039326	1496	2	-0.69107	0.87241	0.91563	1.0	16645	0	-0.69107
LTBP2	4	0.017166	0.0039529	0.039326	1497	2	0.22603	0.12946	0.12011	0.53667	4191	2	0.22603
TSEN15	4	0.017166	0.0039529	0.039326	1498	3	-12724	0.91495	0.96614	1.0	17393	0	-12724
MXD3	4	0.017166	0.0039529	0.039326	1499	2	-0.23672	0.70364	0.64623	0.918738	13384	0	-0.23672
RBCK1	4	0.017166	0.0039529	0.039326	1500	2	0.22523	0.095452	0.098857	0.514136	3382	2	0.22523
PTPRE	4	0.017166	0.0039529	0.039326	1501	2	-0.54854	0.6547	0.57627	0.887339	12406	1	-0.54854
HES7	4	0.017166	0.0039529	0.039326	1502	2	-0.0053609	0.0054382	0.0038643	0.182449	385	2	-0.0053609
AUNIP	4	0.017166	0.0039529	0.039326	1503	3	-29106	0.44934	0.36444	0.738265	9264	1	-29106
PFN1	4	0.017166	0.0039529	0.039326	1504	2	-0.54894	0.8408	0.86416	1.0	16059	0	-0.54894
NDUFS4	4	0.017166	0.0039529	0.039326	1505	3	-28581	0.13942	0.13022	0.555184	4421	1	-28581
OTUB1	4	0.017166	0.0039529	0.039326	1506	2	-0.66547	0.39522	0.32094	0.710033	8630	1	-0.66547
PAH	4	0.017166	0.0039529	0.039326	1507	2	-0.17453	0.13981	0.13022	0.555184	4428	1	-0.17453
CCDC184	4	0.017166	0.0039529	0.039326	1508	3	-27867	0.27139	0.2734	0.692063	7243	1	-27867
MAVS	4	0.017166	0.0039529	0.039326	1509	1	16189	0.016515	0.01971	0.373704	913	2	16189
H2AFB3	4	0.017166	0.0039529	0.039326	1510	4	-0.99668	0.94517	0.99006	1.0	17909	0	-0.99668
HLA-DRB5	4	0.017166	0.0039529	0.039326	1511	2	-0.79967	0.87961	0.9234	1.0	16784	0	-0.79967
TWISTNB	4	0.017166	0.0039529	0.039326	1512	3	-26182	0.36502	0.30523	0.703281	8286	1	-26182
HEY2	4	0.017166	0.0039529	0.039326	1513	1	0.65829	0.20195	0.18952	0.612983	5874	2	0.65829
TP53I3	4	0.017166	0.0039529	0.039326	1514	1	0.90797	0.2426	0.25429	0.692063	6785	2	0.90797
ENTHD1	4	0.017166	0.0039529	0.039326	1515	3	-0.98773	0.70974	0.65163	0.918738	13507	0	-0.98773
SHC4	4	0.017166	0.0039529	0.039326	1516	1	0.97926	0.30692	0.2852	0.692063	7626	1	0.97926
POM121L2	4	0.017166	0.0039529	0.039326	1517	3	-2599	0.54314	0.42402	0.764284	10586	1	-2599
UQCRB	4	0.017166	0.0039529	0.039326	1518	2	0.13426	0.1202	0.10864	0.514136	3973	2	0.13426
CYP4F2	4	0.017166	0.0039529	0.039326	1519	2	0.45052	0.050337	0.068462	0.514136	2283	2	0.45052
TBX6	4	0.017166	0.0039529	0.039326	1520	2	13719	0.0028811	0.002789	0.182449	235	2	13719
KIF4A	4	0.017166	0.0039529	0.039326	1521	3	-26552	0.62463	0.53669	0.864415	11862	1	-26552
LOXHD1	4	0.017166	0.0039529	0.039326	1522	3	-0.91205	0.60858	0.49708	0.817628	11584	1	-0.91205
HNRNPCL2	4	0.017166	0.0039529	0.039326	1523	2	-0.25833	0.14165	0.13088	0.555184	4470	1	-0.25833
TRAPPC2	4	0.017166	0.0039529	0.039326	1524	2	0.54424	0.65374	0.57429	0.884933	12390	1	0.54424
MAB21L2	4	0.017166	0.0039529	0.039326	1525	3	-29712	0.69968	0.64066	0.918738	13302	0	-29712
CPT1C	4	0.017166	0.0039529	0.039326	1526	3	-2756	0.39934	0.32295	0.710377	8680	1	-2756
SFRP5	4	0.017166	0.0039529	0.039326	1527	2	-0.75957	0.79451	0.79354	0.997797	15181	0	-0.75957
CNTLN	4	0.017166	0.0039529	0.039326	1528	4	-11679	0.94975	0.99265	1.0	17983	0	-11679
MSMB	4	0.017166	0.0039529	0.039326	1529	1	1104	0.090718	0.0963	0.514136	3261	2	1104
QARS	4	0.017166	0.0039529	0.039326	1530	2	-0.57684	0.66259	0.59012	0.894681	12554	1	-0.57684
WDR11	4	0.017224	0.0039529	0.039326	1531	4	-4654	0.98278	0.99997	1.0	18512	0	-4654
GPBP1L1	4	0.017307	0.0039534	0.039326	1532	4	-32305	0.98269	0.99996	1.0	18511	0	-32305
C9orf84	4	0.017569	0.0039544	0.039326	1533	4	-30256	0.98243	0.99996	1.0	18509	0	-30256
GNMT	4	0.017586	0.003955	0.039326	1534	4	-49227	0.98241	0.99996	1.0	18508	0	-49227
OR10V1	4	0.017708	0.003956	0.039326	1535	4	-53157	0.98229	0.99996	1.0	18506	0	-53157
TSNAX	4	0.017708	0.003956	0.039326	1536	4	-41932	0.98229	0.99996	1.0	18505	0	-41932
RCOR1	4	0.017708	0.003956	0.039326	1537	4	-53403	0.98229	0.99996	1.0	18504	0	-53403
EID3	4	0.017708	0.003956	0.039326	1538	4	-41516	0.98229	0.99996	1.0	18507	0	-41516
FBRS	4	0.017917	0.003957	0.039326	1539	4	-42653	0.98208	0.99996	1.0	18500	0	-42653
BRINP1	4	0.017917	0.003957	0.039326	1540	4	-44954	0.98208	0.99996	1.0	18499	0	-44954
MTRR	4	0.017917	0.003957	0.039326	1541	4	-41917	0.98208	0.99996	1.0	18502	0	-41917
GOLGA6L6	4	0.017917	0.003957	0.039326	1542	4	-48032	0.98208	0.99996	1.0	18497	0	-48032
BCAS1	4	0.017917	0.003957	0.039326	1543	4	-40958	0.98208	0.99996	1.0	18498	0	-40958
GPR17	4	0.017917	0.003957	0.039326	1544	4	-46082	0.98208	0.99996	1.0	18501	0	-46082
PALD1	4	0.01798	0.003957	0.039326	1545	3	-2883	0.050039	0.068462	0.514136	2275	1	-2883
COG8	4	0.01798	0.003957	0.039326	1546	2	-0.84885	0.52841	0.40803	0.752856	10354	1	-0.84885
GPR62	4	0.01798	0.003957	0.039326	1547	2	-12673	0.40571	0.33085	0.719007	8739	1	-12673
GIF	4	0.01798	0.003957	0.039326	1548	3	-24205	0.82394	0.84234	1.0	15754	0	-24205
AMOTL2	4	0.01798	0.003957	0.039326	1549	2	-12321	0.75305	0.7173	0.950193	14399	0	-12321
BYSL	4	0.01798	0.003957	0.039326	1550	3	-26629	0.38619	0.31795	0.710033	8530	1	-26629
CENPU	4	0.01798	0.003957	0.039326	1551	2	-15324	0.57675	0.46144	0.791716	11085	1	-15324
NMT1	4	0.01798	0.003957	0.039326	1552	3	-26095	0.59934	0.48814	0.815075	11430	1	-26095
HINFP	4	0.01798	0.003957	0.039326	1553	2	-0.28513	0.15855	0.14485	0.562447	4866	2	-0.28513
KIFC3	4	0.01798	0.003957	0.039326	1554	3	-25518	0.44324	0.35846	0.738265	9181	1	-25518
RAB11FIP5	4	0.01798	0.003957	0.039326	1555	2	-0.34828	0.53206	0.412	0.756224	10400	1	-0.34828
C7orf55	4	0.01798	0.003957	0.039326	1556	3	-2.31	0.72588	0.66599	0.918738	13854	0	-2.31
KDM2A	4	0.01798	0.003957	0.039326	1557	2	-15489	0.73134	0.67289	0.919302	13963	0	-15489
TMEM119	4	0.01798	0.003957	0.039326	1558	3	-30514	0.12334	0.10926	0.514136	4042	1	-30514
GPM6A	4	0.01798	0.003957	0.039326	1559	3	-30808	0.24819	0.25999	0.692063	6937	1	-30808
LEFTY2	4	0.01798	0.003957	0.039326	1560	2	-0.30121	0.073041	0.080061	0.514136	2824	2	-0.30121
APOL4	4	0.01798	0.003957	0.039326	1561	2	-0.63105	0.23985	0.25429	0.692063	6715	1	-0.63105
COL12A1	4	0.01798	0.003957	0.039326	1562	2	-0.98053	0.57694	0.46144	0.791716	11088	1	-0.98053
EGR4	4	0.01798	0.003957	0.039326	1563	3	-30207	0.013746	0.015223	0.356286	786	1	-30207
C19orf84	4	0.01798	0.003957	0.039326	1564	4	-30514	0.9647	0.99839	1.0	18217	0	-30514
CPOX	4	0.01798	0.003957	0.039326	1565	3	-30514	0.45228	0.36444	0.738265	9303	1	-30514
ARMC5	4	0.01798	0.003957	0.039326	1566	2	-15123	0.41193	0.33465	0.719007	8815	1	-15123
ZNF683	4	0.01798	0.003957	0.039326	1567	4	-38128	0.97872	0.99993	1.0	18440	0	-38128
ADAD2	4	0.01798	0.003957	0.039326	1568	3	-24205	0.76453	0.73546	0.960271	14632	0	-24205
ACTL9	4	0.01798	0.003957	0.039326	1569	2	-0.82652	0.19044	0.17528	0.591552	5632	1	-0.82652
CCDC24	4	0.01798	0.003957	0.039326	1570	2	-14464	0.12687	0.11325	0.523771	4125	1	-14464
OR8D2	4	0.01798	0.003957	0.039326	1571	2	-0.10861	0.060259	0.070853	0.514136	2526	2	-0.10861
TMEM254	4	0.01798	0.003957	0.039326	1572	3	-26123	0.8665	0.90779	1.0	16533	0	-26123
CRLF2	4	0.01798	0.003957	0.039326	1573	2	-0.71951	0.63194	0.55054	0.87821	11977	1	-0.71951
PAXBP1	4	0.01798	0.003957	0.039326	1574	2	-10192	0.566	0.44364	0.775712	10923	1	-10192
TDP1	4	0.01798	0.003957	0.039326	1575	2	-0.62118	0.21307	0.21344	0.660911	6133	2	-0.62118
ZCCHC16	4	0.018007	0.003957	0.039326	1576	3	-33834	0.45103	0.36444	0.738265	9284	1	-33834
KIF23	4	0.018007	0.003957	0.039326	1577	3	-29862	0.69539	0.63312	0.914885	13223	0	-29862
RPS24	4	0.018007	0.003957	0.039326	1578	3	-33026	0.09048	0.095796	0.514136	3259	1	-33026
C1S	4	0.018007	0.003957	0.039326	1579	3	-34601	0.62382	0.53669	0.864415	11844	1	-34601
ITSN2	4	0.018007	0.003957	0.039326	1580	3	-3575	0.41949	0.33663	0.719007	8913	1	-3575
GAPDHS	4	0.018007	0.003957	0.039326	1581	3	-33619	0.84339	0.8695	1.0	16103	0	-33619
NADK2	4	0.018007	0.003957	0.039326	1582	3	-30327	0.92649	0.97526	1.0	17593	0	-30327
PCNA	4	0.018007	0.003957	0.039326	1583	3	-12616	0.88616	0.93328	1.0	16903	0	-12616
SMURF2	4	0.018007	0.003957	0.039326	1584	3	-36078	0.20134	0.18756	0.612431	5853	1	-36078
TM4SF18	4	0.018007	0.003957	0.039326	1585	3	-33025	0.63621	0.55446	0.878447	12064	1	-33025
ADAM22	4	0.018007	0.003957	0.039326	1586	3	-35465	0.73982	0.69151	0.935475	14127	0	-35465
BAALC	4	0.018139	0.0039575	0.039326	1587	4	-46689	0.98186	0.99996	1.0	18496	0	-46689
CXorf67	4	0.018139	0.0039575	0.039326	1588	4	-4476	0.98186	0.99996	1.0	18495	0	-4476
GPR37	4	0.018321	0.0039575	0.039326	1589	4	-48053	0.98168	0.99996	1.0	18493	0	-48053
STK33	4	0.018569	0.0039596	0.039326	1590	4	-42448	0.98143	0.99996	1.0	18491	0	-42448
TGFB2	4	0.018569	0.0039596	0.039326	1591	4	-48675	0.98143	0.99996	1.0	18487	0	-48675
KRTAP5-10	4	0.018569	0.0039596	0.039326	1592	4	-33834	0.98143	0.99996	1.0	18486	0	-33834
ISX	4	0.018569	0.0039596	0.039326	1593	4	-4821	0.98143	0.99996	1.0	18490	0	-4821
LDLRAD2	4	0.018569	0.0039596	0.039326	1594	4	-42705	0.98143	0.99996	1.0	18489	0	-42705
DTNB	4	0.018569	0.0039596	0.039326	1595	4	-40984	0.98143	0.99996	1.0	18488	0	-40984
SSU72	4	0.01868	0.0039622	0.039326	1596	4	-35083	0.98132	0.99996	1.0	18485	0	-35083
SUN3	4	0.018786	0.0039632	0.039326	1597	4	-39603	0.98121	0.99995	1.0	18484	0	-39603
SLC12A3	4	0.018786	0.0039632	0.039326	1598	4	-39229	0.98121	0.99995	1.0	18483	0	-39229
TEAD2	4	0.018913	0.0039643	0.039326	1599	4	-40567	0.98109	0.99995	1.0	18482	0	-40567
MPST	4	0.019003	0.0039648	0.039326	1600	4	-46444	0.981	0.99995	1.0	18480	0	-46444
EXOSC1	4	0.019003	0.0039648	0.039326	1601	4	-44412	0.981	0.99995	1.0	18481	0	-44412
RPF1	4	0.019138	0.0039648	0.039326	1602	3	-36623	0.71174	0.65351	0.918738	13545	0	-36623
BCS1L	4	0.019138	0.0039648	0.039326	1603	3	-35932	0.46572	0.37637	0.738265	9476	1	-35932
FEN1	4	0.019138	0.0039648	0.039326	1604	3	-13647	0.78192	0.77331	0.988225	14943	0	-13647
KBTBD8	4	0.019138	0.0039648	0.039326	1605	4	-35083	0.96562	0.99863	1.0	18237	0	-35083
RPL3	4	0.019138	0.0039648	0.039326	1606	3	-29525	0.086601	0.09342	0.514136	3148	1	-29525
AP5B1	4	0.019138	0.0039648	0.039326	1607	3	-29063	0.0055153	0.0038648	0.182449	387	1	-29063
PSG1	4	0.019138	0.0039648	0.039326	1608	3	-31363	0.64218	0.56234	0.879138	12175	1	-31363
RPL34	4	0.019138	0.0039648	0.039326	1609	3	-17611	0.78246	0.77331	0.988225	14953	0	-17611
CCDC183	4	0.019138	0.0039648	0.039326	1610	3	-3184	0.6621	0.59012	0.894681	12547	1	-3184
C15orf52	4	0.019138	0.0039648	0.039326	1611	3	-30918	0.044111	0.064456	0.514136	2079	1	-30918
HIST1H2BC	4	0.019138	0.0039648	0.039326	1612	3	-34056	0.15918	0.14485	0.562447	4881	1	-34056
RAB2B	4	0.019138	0.0039648	0.039326	1613	3	-3759	0.6525	0.57429	0.884933	12367	1	-3759
ARSE	4	0.019138	0.0039648	0.039326	1614	3	-38247	0.44567	0.36043	0.738265	9211	1	-38247
MS4A12	4	0.019138	0.0039648	0.039326	1615	3	-28519	0.93024	0.97838	1.0	17652	0	-28519
DUSP14	4	0.019194	0.0039676	0.039326	1616	4	-4484	0.98081	0.99995	1.0	18478	0	-4484
TEKT3	4	0.019194	0.0039676	0.039326	1617	4	-46681	0.98081	0.99995	1.0	18477	0	-46681
ZNF148	4	0.019194	0.0039676	0.039326	1618	4	-45899	0.98081	0.99995	1.0	18479	0	-45899
BANF2	4	0.019369	0.0039705	0.039326	1619	4	-43605	0.98063	0.99995	1.0	18469	0	-43605
DFNA5	4	0.019369	0.0039705	0.039326	1620	4	-4203	0.98063	0.99995	1.0	18473	0	-4203
GRIN2B	4	0.019369	0.0039705	0.039326	1621	4	-5277	0.98063	0.99995	1.0	18474	0	-5277
WBP2NL	4	0.019369	0.0039705	0.039326	1622	4	-51719	0.98063	0.99995	1.0	18472	0	-51719
RIT1	4	0.019369	0.0039705	0.039326	1623	4	-51307	0.98063	0.99995	1.0	18470	0	-51307
CNOT8	4	0.019369	0.0039705	0.039326	1624	4	-45945	0.98063	0.99995	1.0	18475	0	-45945
SMEK1	4	0.019563	0.0039718	0.039326	1625	4	-43616	0.98044	0.99995	1.0	18464	0	-43616
MAP3K14	4	0.019563	0.0039718	0.039326	1626	4	-47114	0.98044	0.99995	1.0	18466	0	-47114
TEX19	4	0.019563	0.0039718	0.039326	1627	4	-44035	0.98044	0.99995	1.0	18465	0	-44035
ZNF484	4	0.019563	0.0039718	0.039326	1628	4	-39814	0.98044	0.99995	1.0	18468	0	-39814
SLAMF9	4	0.019563	0.0039718	0.039326	1629	4	-49175	0.98044	0.99995	1.0	18467	0	-49175
TMEM114	4	0.019743	0.0039752	0.039326	1630	4	-45522	0.98026	0.99994	1.0	18462	0	-45522
KCNK15	4	0.019743	0.0039752	0.039326	1631	4	-40602	0.98026	0.99994	1.0	18463	0	-40602
CDH16	4	0.019743	0.0039752	0.039326	1632	4	-50417	0.98026	0.99994	1.0	18459	0	-50417
VIPR1	4	0.019743	0.0039752	0.039326	1633	4	-4901	0.98026	0.99994	1.0	18461	0	-4901
DSC1	4	0.019918	0.003977	0.039326	1634	4	-48165	0.98008	0.99994	1.0	18458	0	-48165
DDX42	4	0.020025	0.0039783	0.039326	1635	4	-37858	0.97998	0.99994	1.0	18457	0	-37858
C10orf111	4	0.020116	0.0039783	0.039326	1636	4	-42238	0.97988	0.99994	1.0	18455	0	-42238
FBXL19	4	0.020116	0.0039783	0.039326	1637	4	-50206	0.97988	0.99994	1.0	18454	0	-50206
PODN	4	0.020233	0.0039783	0.039326	1638	4	-38872	0.97977	0.99994	1.0	18453	0	-38872
LRRC16B	4	0.02027	0.0039783	0.039326	1639	3	-35353	0.73679	0.68313	0.926953	14077	0	-35353
SPTSSA	4	0.02027	0.0039783	0.039326	1640	3	-39882	0.71047	0.65351	0.918738	13519	0	-39882
KLHL40	4	0.02027	0.0039783	0.039326	1641	3	-25426	0.70667	0.64989	0.918738	13445	0	-25426
UBA1	4	0.02027	0.0039783	0.039326	1642	3	-27627	0.60288	0.49108	0.815075	11488	1	-27627
DHX9	4	0.02027	0.0039783	0.039326	1643	3	-28802	0.60288	0.49108	0.815075	11491	1	-28802
LRRC75B	4	0.02027	0.0039783	0.039326	1644	3	-31724	0.67214	0.60202	0.899677	12744	1	-31724
RBPMS	4	0.02027	0.0039783	0.039326	1645	3	-3634	0.90345	0.95408	1.0	17191	0	-3634
PRPF4	4	0.02027	0.0039783	0.039326	1646	3	-32657	0.745	0.70452	0.946306	14231	0	-32657
FOXC2	4	0.02027	0.0039783	0.039326	1647	4	-35666	0.9501	0.99288	1.0	17989	0	-35666
GPR50	4	0.02027	0.0039783	0.039326	1648	3	-25236	0.93217	0.98035	1.0	17699	0	-25236
C9orf171	4	0.02027	0.0039783	0.039326	1649	3	-13647	0.063043	0.071612	0.514136	2591	1	-13647
ASAH2B	4	0.02027	0.0039783	0.039326	1650	3	-37654	0.045259	0.065126	0.514136	2119	1	-37654
GDF2	4	0.02027	0.0039783	0.039326	1651	3	-20895	0.75247	0.7173	0.950193	14387	0	-20895
NEUROG1	4	0.02027	0.0039783	0.039326	1652	3	-32709	0.93392	0.98176	1.0	17728	0	-32709
CANT1	4	0.02027	0.0039783	0.039326	1653	3	-36483	0.040135	0.057502	0.514136	1911	1	-36483
TAF9	4	0.02027	0.0039783	0.039326	1654	4	-39777	0.97452	0.99982	1.0	18373	0	-39777
LOC100130357	4	0.02027	0.0039783	0.039326	1655	3	-18146	0.45523	0.3664	0.738265	9350	1	-18146
KIF5A	4	0.02027	0.0039783	0.039326	1656	3	-36078	0.2758	0.2734	0.692063	7296	1	-36078
KREMEN1	4	0.02027	0.0039783	0.039326	1657	3	-22843	0.36757	0.30913	0.704374	8320	1	-22843
RBPJ	4	0.02027	0.0039783	0.039326	1658	3	-29937	0.64675	0.56531	0.881771	12251	1	-29937
CAMK2A	4	0.02027	0.0039783	0.039326	1659	3	-34085	0.24244	0.25429	0.692063	6781	1	-34085
MORN3	4	0.02027	0.0039783	0.039326	1660	4	-39195	0.97665	0.99987	1.0	18401	0	-39195
LOC113230	4	0.02027	0.0039783	0.039326	1661	3	-19108	0.94108	0.98674	1.0	17847	0	-19108
PLEKHG4B	4	0.020307	0.0039783	0.039326	1662	2	-14047	0.90662	0.95721	1.0	17241	0	-14047
ZSCAN20	4	0.020307	0.0039783	0.039326	1663	2	0.81351	0.012141	0.011076	0.294475	708	2	0.81351
L3MBTL4	4	0.020307	0.0039783	0.039326	1664	3	-30786	0.87225	0.91499	1.0	16640	0	-30786
NENF	4	0.020307	0.0039783	0.039326	1665	3	-3108	0.14662	0.13367	0.55577	4573	1	-3108
KL	4	0.020307	0.0039783	0.039326	1666	4	-30786	0.949	0.9919	1.0	17968	0	-30786
ZNF853	4	0.020307	0.0039783	0.039326	1667	2	-11819	0.86001	0.8995	1.0	16419	0	-11819
FAM19A2	4	0.020307	0.0039783	0.039326	1668	2	-0.67604	0.3224	0.28721	0.692063	7795	1	-0.67604
PPIAL4A	4	0.020307	0.0039783	0.039326	1669	2	-0.79519	0.18121	0.1648	0.579908	5399	1	-0.79519
FRAT1	4	0.020307	0.0039783	0.039326	1670	3	-26901	0.59523	0.47726	0.80137	11370	1	-26901
XPA	4	0.020307	0.0039783	0.039326	1671	2	-12584	0.32456	0.28721	0.692063	7816	1	-12584
EIF3CL	4	0.020307	0.0039783	0.039326	1672	3	-31635	0.27827	0.2734	0.692063	7321	1	-31635
TRMT61B	4	0.020307	0.0039783	0.039326	1673	2	0.15798	0.07608	0.08268	0.514136	2901	2	0.15798
FBXO48	4	0.020307	0.0039783	0.039326	1674	4	-24847	0.95801	0.99636	1.0	18113	0	-24847
NDUFA3	4	0.020307	0.0039783	0.039326	1675	2	-0.62012	0.68205	0.61582	0.909406	12940	0	-0.62012
SETBP1	4	0.020307	0.0039783	0.039326	1676	3	-15073	0.4487	0.36444	0.738265	9254	1	-15073
CDC37L1	4	0.020307	0.0039783	0.039326	1677	3	-17163	0.4463	0.36241	0.738265	9221	1	-17163
SCAF1	4	0.020307	0.0039783	0.039326	1678	2	-0.5399	0.70007	0.64066	0.918738	13312	0	-0.5399
DUOXA2	4	0.020307	0.0039783	0.039326	1679	2	-0.83757	0.71348	0.65716	0.918738	13576	0	-0.83757
KCNS3	4	0.020307	0.0039783	0.039326	1680	3	-31363	0.86827	0.90983	1.0	16572	0	-31363
DGAT2L6	4	0.020307	0.0039783	0.039326	1681	3	-26435	0.88087	0.92683	1.0	16808	0	-26435
SEMA6D	4	0.020307	0.0039783	0.039326	1682	3	-21648	0.70741	0.64989	0.918738	13457	0	-21648
SETD7	4	0.020307	0.0039783	0.039326	1683	2	-12591	0.86875	0.91049	1.0	16582	0	-12591
PKDCC	4	0.020307	0.0039783	0.039326	1684	3	-29102	0.81934	0.83726	1.0	15673	0	-29102
IFIT1B	4	0.020307	0.0039783	0.039326	1685	2	-0.56348	0.0573	0.069432	0.514136	2451	1	-0.56348
PHGDH	4	0.020307	0.0039783	0.039326	1686	3	-29471	0.21792	0.21682	0.664084	6237	1	-29471
JAKMIP3	4	0.020307	0.0039783	0.039326	1687	3	-29471	0.67181	0.60202	0.899677	12739	1	-29471
FNTB	4	0.020307	0.0039783	0.039326	1688	2	-10412	0.31453	0.28721	0.692063	7702	1	-10412
ARPC4-TTLL3	4	0.020307	0.0039783	0.039326	1689	2	-0.74377	0.68735	0.62554	0.914885	13048	0	-0.74377
CARD17	4	0.020307	0.0039783	0.039326	1690	3	-27398	0.36103	0.29921	0.693524	8240	1	-27398
HLA-DMA	4	0.020339	0.0039783	0.039326	1691	4	-44322	0.97966	0.99994	1.0	18452	0	-44322
UCHL5	4	0.020519	0.0039788	0.039326	1692	4	-48308	0.97948	0.99994	1.0	18448	0	-48308
CFAP43	4	0.020519	0.0039788	0.039326	1693	4	-41763	0.97948	0.99994	1.0	18449	0	-41763
KRTAP10-12	4	0.020694	0.0039788	0.039326	1694	4	-45662	0.97931	0.99994	1.0	18446	0	-45662
SNN	4	0.020694	0.0039788	0.039326	1695	4	-37157	0.97931	0.99994	1.0	18445	0	-37157
ADPGK	4	0.020879	0.0039788	0.039326	1696	4	-47025	0.97912	0.99994	1.0	18444	0	-47025
RMI2	4	0.020879	0.0039788	0.039326	1697	4	-52151	0.97912	0.99994	1.0	18443	0	-52151
ZC3H3	4	0.02128	0.0039842	0.039326	1698	4	-46458	0.97872	0.99993	1.0	18439	0	-46458
KAT2A	4	0.02128	0.0039842	0.039326	1699	4	-53171	0.97872	0.99993	1.0	18438	0	-53171
HEATR9	4	0.02128	0.0039842	0.039326	1700	4	-42304	0.97872	0.99993	1.0	18441	0	-42304
PPL	4	0.02128	0.0039842	0.039326	1701	4	-41129	0.97872	0.99993	1.0	18442	0	-41129
SP140L	4	0.02128	0.0039842	0.039326	1702	4	-49451	0.97872	0.99993	1.0	18437	0	-49451
C6orf201	4	0.021424	0.0039855	0.039326	1703	4	-39397	0.97858	0.99993	1.0	18432	0	-39397
NUP37	4	0.021424	0.0039855	0.039326	1704	4	-3203	0.97858	0.99993	1.0	18433	0	-3203
HTR1A	4	0.021424	0.0039855	0.039326	1705	4	-49041	0.97858	0.99993	1.0	18434	0	-49041
NEK6	4	0.021498	0.003986	0.039326	1706	4	-32602	0.9785	0.99993	1.0	18431	0	-32602
UBQLN2	4	0.0215	0.003986	0.039326	1707	3	-31373	0.66802	0.59411	0.896533	12666	1	-31373
VGF	4	0.0215	0.003986	0.039326	1708	3	-33828	0.2741	0.2734	0.692063	7275	1	-33828
SHOC2	4	0.0215	0.003986	0.039326	1709	4	-39264	0.96367	0.99823	1.0	18203	0	-39264
TMEM185B	4	0.0215	0.003986	0.039326	1710	3	-12616	0.90514	0.95648	1.0	17218	0	-12616
NAT14	4	0.0215	0.003986	0.039326	1711	3	-22139	0.26272	0.2734	0.692063	7160	1	-22139
RPS14	4	0.0215	0.003986	0.039326	1712	3	-18399	0.5214	0.40214	0.745076	10252	1	-18399
PYCARD	4	0.0215	0.003986	0.039326	1713	3	-29606	0.61459	0.50693	0.827421	11697	1	-29606
ELFN1	4	0.0215	0.003986	0.039326	1714	3	-36215	0.59828	0.48517	0.812376	11416	1	-36215
PPA2	4	0.0215	0.003986	0.039326	1715	4	-33553	0.97306	0.99974	1.0	18348	0	-33553
MYF6	4	0.0215	0.003986	0.039326	1716	3	-37782	0.8395	0.86146	1.0	16039	0	-37782
REEP2	4	0.0215	0.003986	0.039326	1717	3	-31363	0.23211	0.24046	0.692063	6546	1	-31363
SMIM23	4	0.0215	0.003986	0.039326	1718	3	-3558	0.3819	0.31496	0.70788	8482	1	-3558
TMED6	4	0.0215	0.003986	0.039326	1719	3	-40121	0.37303	0.30913	0.704374	8378	1	-40121
TCEB2	4	0.0215	0.003986	0.039326	1720	3	-27127	0.1028	0.10504	0.514136	3567	1	-27127
SETD8	4	0.0215	0.003986	0.039326	1721	3	-31566	0.2011	0.18656	0.609369	5847	1	-31566
TUBB6	4	0.0215	0.003986	0.039326	1722	3	-36309	0.74525	0.7061	0.947569	14242	0	-36309
DROSHA	4	0.0215	0.003986	0.039326	1723	3	-39433	0.90013	0.94828	1.0	17141	0	-39433
ABR	4	0.0215	0.003986	0.039326	1724	3	-39406	0.54933	0.43084	0.768953	10671	1	-39406
ZNF407	4	0.0215	0.003986	0.039326	1725	3	-29862	0.3015	0.2852	0.692063	7563	1	-29862
WTIP	4	0.0215	0.003986	0.039326	1726	3	-40647	0.64644	0.56432	0.880648	12244	1	-40647
ANXA2R	4	0.0215	0.003986	0.039326	1727	4	-2187	0.96592	0.99871	1.0	18245	0	-2187
KCNK7	4	0.021592	0.0039891	0.039326	1728	4	-51367	0.97841	0.99993	1.0	18430	0	-51367
CD109	4	0.021733	0.0039933	0.039326	1729	4	-4617	0.97827	0.99992	1.0	18428	0	-4617
MTERF2	4	0.021733	0.0039933	0.039326	1730	4	-38093	0.97827	0.99992	1.0	18427	0	-38093
OR7A5	4	0.021733	0.0039933	0.039326	1731	4	-48433	0.97827	0.99992	1.0	18426	0	-48433
IL1RL2	4	0.021733	0.0039933	0.039326	1732	4	-45813	0.97827	0.99992	1.0	18429	0	-45813
POLQ	4	0.021733	0.0039933	0.039326	1733	4	-5032	0.97827	0.99992	1.0	18425	0	-5032
CISH	4	0.021923	0.0039982	0.039326	1734	4	-41978	0.97808	0.99992	1.0	18423	0	-41978
NECAB3	4	0.021923	0.0039982	0.039326	1735	4	-50269	0.97808	0.99992	1.0	18421	0	-50269
CLPSL1	4	0.021923	0.0039982	0.039326	1736	4	-46272	0.97808	0.99992	1.0	18422	0	-46272
S100B	4	0.022104	0.0040049	0.039326	1737	4	-52411	0.9779	0.99991	1.0	18419	0	-52411
IAH1	4	0.022104	0.0040049	0.039326	1738	4	-4578	0.9779	0.99991	1.0	18420	0	-4578
FOXJ1	4	0.022254	0.0040096	0.039326	1739	4	-45121	0.97775	0.99991	1.0	18418	0	-45121
ZNF768	4	0.022254	0.0040096	0.039326	1740	4	-43018	0.97775	0.99991	1.0	18417	0	-43018
SPTLC1	4	0.022561	0.0040119	0.039326	1741	4	-44817	0.97744	0.99991	1.0	18416	0	-44817
LIN7A	4	0.022722	0.0040174	0.039326	1742	4	-50296	0.97728	0.9999	1.0	18415	0	-50296
TMEM220	4	0.022725	0.0040228	0.039326	1743	3	-36721	0.17816	0.16304	0.579908	5339	1	-36721
HSPD1	4	0.022725	0.0040228	0.039326	1744	3	-37139	0.81659	0.8331	1.0	15623	0	-37139
DUSP1	4	0.022725	0.0040228	0.039326	1745	3	-37551	0.62115	0.52674	0.852763	11797	1	-37551
PTCH2	4	0.022725	0.0040228	0.039326	1746	3	-34528	0.49156	0.38428	0.74264	9835	1	-34528
KPNA4	4	0.022725	0.0040228	0.039326	1747	3	-35806	0.93278	0.98118	1.0	17709	0	-35806
ZBTB8OS	4	0.022725	0.0040228	0.039326	1748	3	-38511	0.7207	0.66244	0.918738	13727	0	-38511
HLA-C	4	0.022725	0.0040228	0.039326	1749	3	-40181	0.46436	0.37637	0.738265	9463	1	-40181
C10orf126	4	0.022725	0.0040228	0.039326	1750	3	-38987	0.88858	0.9349	1.0	16947	0	-38987
FRMD4A	4	0.022725	0.0040228	0.039326	1751	3	-38969	0.63022	0.55054	0.87821	11952	1	-38969
MAGEA12	4	0.022725	0.0040228	0.039326	1752	3	-20535	0.38793	0.31895	0.710033	8547	1	-20535
TRA2A	4	0.022725	0.0040228	0.039326	1753	4	-23271	0.97338	0.99974	1.0	18353	0	-23271
TRIAP1	4	0.022725	0.0040228	0.039326	1754	3	-3558	0.34581	0.29525	0.692063	8071	1	-3558
WDR55	4	0.022725	0.0040228	0.039326	1755	3	-23014	0.88209	0.92795	1.0	16828	0	-23014
FGD4	4	0.022725	0.0040228	0.039326	1756	3	-28394	0.25862	0.2734	0.692063	7122	1	-28394
PTGDR2	4	0.022725	0.0040228	0.039326	1757	4	-29312	0.95801	0.99636	1.0	18112	0	-29312
RBFOX2	4	0.022725	0.0040228	0.039326	1758	3	-30516	0.66475	0.59012	0.894681	12605	1	-30516
ADAM29	4	0.022852	0.004027	0.039326	1759	4	-46337	0.97715	0.99989	1.0	18414	0	-46337
MYL7	4	0.022852	0.004027	0.039326	1760	4	-47268	0.97715	0.99989	1.0	18413	0	-47268
RRM2	4	0.022872	0.0040306	0.039326	1761	3	-13254	0.23211	0.24046	0.692063	6548	1	-13254
TRNT1	4	0.022872	0.0040306	0.039326	1762	2	-0.53961	0.15655	0.14064	0.556148	4814	2	-0.53961
CC2D1B	4	0.022872	0.0040306	0.039326	1763	2	-0.50864	0.20579	0.20344	0.650282	5960	2	-0.50864
LIMA1	4	0.022872	0.0040306	0.039326	1764	2	-0.94527	0.052274	0.068772	0.514136	2337	1	-0.94527
PDE4A	4	0.022872	0.0040306	0.039326	1765	3	-25426	0.83889	0.86146	1.0	16029	0	-25426
RBM3	4	0.022872	0.0040306	0.039326	1766	2	-11967	0.65054	0.57229	0.884933	12324	1	-11967
NLE1	4	0.022872	0.0040306	0.039326	1767	3	-17902	0.11066	0.1056	0.514136	3737	1	-17902
LTBP3	4	0.022872	0.0040306	0.039326	1768	3	-31048	0.38984	0.31895	0.710033	8567	1	-31048
C11orf84	4	0.022872	0.0040306	0.039326	1769	2	-14041	0.011981	0.011076	0.294475	699	1	-14041
RPS27L	4	0.022872	0.0040306	0.039326	1770	2	-0.96591	0.82903	0.84928	1.0	15853	0	-0.96591
POMGNT1	4	0.022872	0.0040306	0.039326	1771	2	-0.87653	0.45399	0.36444	0.738265	9331	1	-0.87653
NETO2	4	0.022872	0.0040306	0.039326	1772	2	0.28633	0.12257	0.10864	0.514136	4027	2	0.28633
EFTUD2	4	0.022872	0.0040306	0.039326	1773	3	-28125	0.07747	0.085644	0.514136	2934	1	-28125
ADHFE1	4	0.022872	0.0040306	0.039326	1774	4	-28562	0.9586	0.99666	1.0	18120	0	-28562
NUP93	4	0.022872	0.0040306	0.039326	1775	3	-29734	0.90695	0.95834	1.0	17251	0	-29734
SPX	4	0.022872	0.0040306	0.039326	1776	2	-0.36336	0.51013	0.39621	0.745076	10089	1	-0.36336
HMGA2	4	0.022872	0.0040306	0.039326	1777	2	-14945	0.82549	0.84431	1.0	15786	0	-14945
RBM17	4	0.022872	0.0040306	0.039326	1778	3	-14582	0.79632	0.79715	1.0	15227	0	-14582
FZD10	4	0.022872	0.0040306	0.039326	1779	2	-0.92742	0.097483	0.099422	0.514136	3423	1	-0.92742
KRT19	4	0.022872	0.0040306	0.039326	1780	3	-30085	0.85511	0.89225	1.0	16337	0	-30085
HNRNPF	4	0.022872	0.0040306	0.039326	1781	2	-17006	0.74787	0.71421	0.950193	14286	0	-17006
C2orf61	4	0.022872	0.0040306	0.039326	1782	2	-17406	0.73387	0.67465	0.919302	14019	0	-17406
ROMO1	4	0.022872	0.0040306	0.039326	1783	3	-31897	0.48445	0.37831	0.738265	9741	1	-31897
SIX5	4	0.022872	0.0040306	0.039326	1784	2	-0.74079	0.21751	0.21566	0.661157	6232	2	-0.74079
ERF	4	0.022872	0.0040306	0.039326	1785	3	-32159	0.26952	0.2734	0.692063	7219	1	-32159
PADI1	4	0.022872	0.0040306	0.039326	1786	4	-31342	0.953	0.99421	1.0	18036	0	-31342
KLRC4	4	0.022872	0.0040306	0.039326	1787	3	-31897	0.36904	0.30913	0.704374	8338	1	-31897
STX10	4	0.022872	0.0040306	0.039326	1788	3	-31342	0.40995	0.33465	0.719007	8799	1	-31342
ZNF490	4	0.022872	0.0040306	0.039326	1789	3	-29499	0.81025	0.81925	1.0	15504	0	-29499
SPC25	4	0.022872	0.0040306	0.039326	1790	2	-0.99015	0.098774	0.09994	0.514136	3454	1	-0.99015
DEFB121	4	0.022872	0.0040306	0.039326	1791	2	-14463	0.15361	0.14064	0.556148	4744	1	-14463
SLC18A2	4	0.022989	0.0040332	0.039326	1792	4	-57296	0.97701	0.99988	1.0	18410	0	-57296
RD3L	4	0.022989	0.0040332	0.039326	1793	4	-46652	0.97701	0.99988	1.0	18408	0	-46652
USP32	4	0.022989	0.0040332	0.039326	1794	4	-53851	0.97701	0.99988	1.0	18411	0	-53851
TOR1A	4	0.022989	0.0040332	0.039326	1795	4	-44172	0.97701	0.99988	1.0	18409	0	-44172
ARPC1A	4	0.022989	0.0040332	0.039326	1796	4	-4693	0.97701	0.99988	1.0	18407	0	-4693
PNLIP	4	0.023063	0.0040358	0.039326	1797	4	-43426	0.97694	0.99988	1.0	18406	0	-43426
PDE4C	4	0.023127	0.0040389	0.039326	1798	4	-3044	0.97687	0.99988	1.0	18403	0	-3044
ACTA1	4	0.023127	0.0040389	0.039326	1799	4	-38807	0.97687	0.99988	1.0	18405	0	-38807
EDNRA	4	0.023127	0.0040389	0.039326	1800	4	-56878	0.97687	0.99988	1.0	18404	0	-56878
CYB5R4	4	0.023271	0.0040446	0.039326	1801	4	-49854	0.97673	0.99987	1.0	18402	0	-49854
LIPI	4	0.023428	0.0040466	0.039326	1802	4	-44195	0.97657	0.99987	1.0	18400	0	-44195
KATNB1	4	0.023582	0.0040466	0.039326	1803	4	-4583	0.97642	0.99987	1.0	18398	0	-4583
NACA	4	0.023741	0.0040472	0.039326	1804	4	-33937	0.97626	0.99987	1.0	18396	0	-33937
MAP3K12	4	0.023741	0.0040472	0.039326	1805	4	-46358	0.97626	0.99987	1.0	18395	0	-46358
MTMR10	4	0.023875	0.0040472	0.039326	1806	4	-4557	0.97612	0.99987	1.0	18394	0	-4557
WDR41	4	0.023905	0.0040479	0.039326	1807	3	-41481	0.74389	0.70292	0.944753	14207	0	-41481
PNMAL1	4	0.023905	0.0040479	0.039326	1808	3	-41145	0.32147	0.28721	0.692063	7783	1	-41145
MIS18A	4	0.023905	0.0040479	0.039326	1809	4	-37231	0.97508	0.99984	1.0	18380	0	-37231
ATXN7L3	4	0.023905	0.0040479	0.039326	1810	3	-2606	0.87818	0.92279	1.0	16757	0	-2606
ATRX	4	0.023905	0.0040479	0.039326	1811	3	-35666	0.91918	0.97043	1.0	17461	0	-35666
GBP2	4	0.023905	0.0040479	0.039326	1812	4	-33437	0.96351	0.9982	1.0	18199	0	-33437
INTS2	4	0.023905	0.0040479	0.039326	1813	3	-32359	0.010649	0.010572	0.294475	635	1	-32359
CATSPER2	4	0.023905	0.0040479	0.039326	1814	3	-40706	0.84318	0.8695	1.0	16100	0	-40706
TCP1	4	0.023905	0.0040479	0.039326	1815	3	-34548	0.21178	0.21006	0.656968	6103	1	-34548
EPT1	4	0.023905	0.0040479	0.039326	1816	3	-3382	0.83061	0.85022	1.0	15884	0	-3382
KRTAP9-1	4	0.023905	0.0040479	0.039326	1817	3	-30209	0.88791	0.93439	1.0	16934	0	-30209
KDM4B	4	0.023905	0.0040479	0.039326	1818	3	-38795	0.8005	0.80431	1.0	15304	0	-38795
CNTN2	4	0.023905	0.0040479	0.039326	1819	3	-37551	0.82726	0.84635	1.0	15816	0	-37551
SIPA1L3	4	0.023905	0.0040479	0.039326	1820	3	-38969	0.41852	0.33663	0.719007	8896	1	-38969
PMAIP1	4	0.023905	0.0040479	0.039326	1821	3	-20155	0.65698	0.58614	0.894681	12445	1	-20155
AKT1S1	4	0.023905	0.0040479	0.039326	1822	3	-33559	0.37655	0.31108	0.706045	8415	1	-33559
SQLE	4	0.023905	0.0040479	0.039326	1823	3	-33798	0.30411	0.2852	0.692063	7598	1	-33798
TLE6	4	0.023905	0.0040479	0.039326	1824	3	-3812	0.78557	0.77724	0.988945	15010	0	-3812
TMEM115	4	0.023905	0.0040479	0.039326	1825	3	-37294	0.5037	0.39022	0.74264	9998	1	-37294
GAGE10	4	0.023905	0.0040479	0.039326	1826	3	-34224	0.13003	0.12011	0.53667	4208	1	-34224
EIF1AY	4	0.023905	0.0040479	0.039326	1827	4	-35986	0.95366	0.99453	1.0	18044	0	-35986
NUMB	4	0.023905	0.0040479	0.039326	1828	3	-32554	0.39579	0.32094	0.710033	8639	1	-32554
MAGEE1	4	0.023905	0.0040479	0.039326	1829	4	-38128	0.96041	0.99763	1.0	18152	0	-38128
C10orf128	4	0.023905	0.0040479	0.039326	1830	3	-35739	0.12687	0.11325	0.523771	4124	1	-35739
FAXDC2	4	0.023905	0.0040479	0.039326	1831	3	-16728	0.055074	0.068773	0.514136	2400	1	-16728
MRPS27	4	0.023905	0.0040479	0.039326	1832	3	-35932	0.93578	0.98284	1.0	17767	0	-35932
PLAA	4	0.023905	0.0040479	0.039326	1833	3	-3317	0.73625	0.67976	0.923567	14065	0	-3317
DLX4	4	0.023905	0.0040479	0.039326	1834	3	-32751	0.31489	0.28721	0.692063	7710	1	-32751
CDH24	4	0.023934	0.0040487	0.039326	1835	4	-36726	0.97607	0.99987	1.0	18392	0	-36726
SNX33	4	0.024113	0.0040529	0.039326	1836	4	-39684	0.97589	0.99987	1.0	18390	0	-39684
SCG2	4	0.024294	0.0040534	0.039326	1837	4	-44095	0.97571	0.99987	1.0	18389	0	-44095
R3HDML	4	0.024528	0.0040632	0.039326	1838	4	-4852	0.97547	0.99986	1.0	18387	0	-4852
TNNI3K	4	0.024647	0.004072	0.039326	1839	4	-50804	0.97535	0.99985	1.0	18386	0	-50804
CTXN2	4	0.024719	0.0040803	0.039326	1840	4	-45122	0.97528	0.99984	1.0	18384	0	-45122
KIF2C	4	0.024779	0.0040803	0.039326	1841	4	-44818	0.97522	0.99984	1.0	18383	0	-44818
CXorf36	4	0.024884	0.0040803	0.039326	1842	4	-53052	0.97512	0.99984	1.0	18382	0	-53052
FRG2B	4	0.024884	0.0040803	0.039326	1843	4	-48426	0.97512	0.99984	1.0	18381	0	-48426
CHMP7	4	0.024978	0.0040808	0.039326	1844	4	-44673	0.97502	0.99984	1.0	18379	0	-44673
ADGRG4	4	0.025098	0.0040808	0.039326	1845	4	-50526	0.9749	0.99984	1.0	18378	0	-50526
VARS2	4	0.025142	0.0040808	0.039326	1846	3	-41076	0.77678	0.75981	0.977633	14852	0	-41076
CPA1	4	0.025142	0.0040808	0.039326	1847	3	-36928	0.1619	0.14562	0.562447	4943	1	-36928
PRDX6	4	0.025142	0.0040808	0.039326	1848	3	-36194	0.084694	0.092512	0.514136	3099	1	-36194
RNASE3	4	0.025142	0.0040808	0.039326	1849	3	-38572	0.93499	0.98255	1.0	17749	0	-38572
ABCA7	4	0.025142	0.0040808	0.039326	1850	3	-37824	0.93867	0.98517	1.0	17810	0	-37824
AIG1	4	0.025142	0.0040808	0.039326	1851	3	-3412	0.39341	0.32094	0.710033	8610	1	-3412
TPX2	4	0.025142	0.0040808	0.039326	1852	3	-39315	0.057374	0.069432	0.514136	2454	1	-39315
ACAD11	4	0.025142	0.0040808	0.039326	1853	3	-40217	0.73445	0.67465	0.919302	14027	0	-40217
EPSTI1	4	0.025142	0.0040808	0.039326	1854	3	-37706	0.50431	0.39022	0.74264	10006	1	-37706
EPDR1	4	0.025142	0.0040808	0.039326	1855	3	-37503	0.36103	0.29921	0.693524	8243	1	-37503
TRIM73	4	0.025142	0.0040808	0.039326	1856	3	-34232	0.51013	0.39621	0.745076	10093	1	-34232
ALDH18A1	4	0.025142	0.0040808	0.039326	1857	3	-29472	0.55003	0.43283	0.768953	10680	1	-29472
C8orf33	4	0.025271	0.0040847	0.039326	1858	4	-43765	0.97473	0.99983	1.0	18375	0	-43765
CIAO1	4	0.025271	0.0040847	0.039326	1859	4	-53249	0.97473	0.99983	1.0	18376	0	-53249
ATAD5	4	0.025298	0.0040886	0.039326	1860	2	-0.71868	0.71348	0.65716	0.918738	13579	0	-0.71868
FAM216A	4	0.025298	0.0040886	0.039326	1861	1	0.91973	0.61132	0.49904	0.819166	11630	1	0.91973
BTN2A1	4	0.025298	0.0040886	0.039326	1862	2	0.13264	0.8261	0.84635	1.0	15796	0	0.13264
HIST1H3D	4	0.025298	0.0040886	0.039326	1863	3	-25236	0.0052324	0.0037908	0.182449	376	1	-25236
ASMTL	4	0.025298	0.0040886	0.039326	1864	2	-0.38891	0.16061	0.14562	0.562447	4911	1	-0.38891
CSRP2BP	4	0.025298	0.0040886	0.039326	1865	2	-0.91957	0.86165	0.9009	1.0	16449	0	-0.91957
SSBP3	4	0.025298	0.0040886	0.039326	1866	3	-27832	0.47565	0.37637	0.738265	9627	1	-27832
CCL15	4	0.025298	0.0040886	0.039326	1867	2	0.59495	0.030204	0.029928	0.374832	1502	2	0.59495
KDM5A	4	0.025298	0.0040886	0.039326	1868	2	-0.75593	0.35961	0.29921	0.693524	8226	1	-0.75593
GABPA	4	0.025298	0.0040886	0.039326	1869	1	-0.064367	0.27853	0.2734	0.692063	7324	1	-0.064367
HSF4	4	0.025298	0.0040886	0.039326	1870	3	-26139	0.27349	0.2734	0.692063	7269	1	-26139
WNT5B	4	0.025298	0.0040886	0.039326	1871	2	-0.65646	0.9038	0.95448	1.0	17200	0	-0.65646
SP100	4	0.025298	0.0040886	0.039326	1872	3	-25236	0.17244	0.1596	0.579908	5196	1	-25236
CENPI	4	0.025298	0.0040886	0.039326	1873	2	0.50176	0.051741	0.068462	0.514136	2320	2	0.50176
VDAC3	4	0.025298	0.0040886	0.039326	1874	3	-27663	0.62954	0.54656	0.874999	11936	1	-27663
ZNF93	4	0.025298	0.0040886	0.039326	1875	3	-35643	0.32684	0.28721	0.692063	7843	1	-35643
FAM43A	4	0.025298	0.0040886	0.039326	1876	1	21008	0.014508	0.015395	0.356286	818	3	21008
GDPGP1	4	0.025298	0.0040886	0.039326	1877	3	-13755	0.90112	0.95126	1.0	17153	0	-13755
SDS	4	0.025298	0.0040886	0.039326	1878	3	-27311	0.1183	0.10741	0.514136	3921	1	-27311
TMEM87B	4	0.025298	0.0040886	0.039326	1879	3	-31449	0.75832	0.72646	0.95627	14501	0	-31449
RASD2	4	0.025298	0.0040886	0.039326	1880	2	-0.65038	0.79204	0.78861	0.994282	15133	0	-0.65038
PRR7	4	0.025298	0.0040886	0.039326	1881	2	-0.7574	0.74224	0.70292	0.944753	14171	0	-0.7574
ROCK1	4	0.025298	0.0040886	0.039326	1882	1	0.47223	0.21827	0.21896	0.66861	6241	1	0.47223
SLC25A2	4	0.025298	0.0040886	0.039326	1883	3	-29865	0.28518	0.27738	0.692063	7396	1	-29865
ZASP	4	0.025298	0.0040886	0.039326	1884	1	0.19577	0.68683	0.62554	0.914885	13036	0	0.19577
OR51Q1	4	0.025298	0.0040886	0.039326	1885	2	-0.2375	0.21178	0.21006	0.656968	6109	1	-0.2375
TNPO3	4	0.025298	0.0040886	0.039326	1886	1	14761	0.02393	0.025135	0.373704	1246	2	14761
RANBP6	4	0.025298	0.0040886	0.039326	1887	3	-33395	0.82052	0.83825	1.0	15694	0	-33395
GRB10	4	0.025298	0.0040886	0.039326	1888	3	-26139	0.56024	0.43772	0.771729	10819	1	-26139
SLFNL1	4	0.025298	0.0040886	0.039326	1889	1	17701	0.045648	0.065126	0.514136	2132	2	17701
PET117	4	0.025298	0.0040886	0.039326	1890	3	-31649	0.37947	0.313	0.706959	8456	1	-31649
CDC23	4	0.025298	0.0040886	0.039326	1891	2	-0.24253	0.048721	0.068168	0.514136	2240	1	-0.24253
RASAL3	4	0.025298	0.0040886	0.039326	1892	1	21261	0.041929	0.058395	0.514136	1986	2	21261
RPS19	4	0.025298	0.0040886	0.039326	1893	2	0.4743	0.040224	0.057502	0.514136	1915	2	0.4743
KLHL3	4	0.025298	0.0040886	0.039326	1894	1	0.51679	0.5439	0.42402	0.764284	10600	1	0.51679
DCST1	4	0.025298	0.0040886	0.039326	1895	2	-0.60287	0.70579	0.64989	0.918738	13428	0	-0.60287
KRTAP6-3	4	0.025298	0.0040886	0.039326	1896	2	0.31997	0.026995	0.027155	0.373704	1376	1	0.31997
MTRNR2L10	4	0.025298	0.0040886	0.039326	1897	3	-31939	0.48827	0.37831	0.738265	9793	1	-31939
C4orf47	4	0.025298	0.0040886	0.039326	1898	3	-31939	0.7699	0.74419	0.965472	14725	0	-31939
LTBP1	4	0.025298	0.0040886	0.039326	1899	3	-29607	0.80235	0.80899	1.0	15343	0	-29607
ST3GAL5	4	0.025298	0.0040886	0.039326	1900	3	-27311	0.61459	0.50693	0.827421	11695	1	-27311
GABARAP	4	0.025298	0.0040886	0.039326	1901	3	-10726	0.90679	0.9576	1.0	17246	0	-10726
RFC1	4	0.025298	0.0040886	0.039326	1902	3	-0.40476	0.29374	0.27934	0.692063	7482	1	-0.40476
NTNG2	4	0.025298	0.0040886	0.039326	1903	3	-16807	0.85863	0.89807	1.0	16390	0	-16807
EPHA1	4	0.025298	0.0040886	0.039326	1904	4	-30471	0.95508	0.99513	1.0	18068	0	-30471
SPAG7	4	0.025298	0.0040886	0.039326	1905	3	-27832	0.77961	0.76661	0.982682	14904	0	-27832
COQ5	4	0.025298	0.0040886	0.039326	1906	3	-26749	0.75961	0.72948	0.95627	14524	0	-26749
AMOTL1	4	0.025298	0.0040886	0.039326	1907	3	-10698	0.61718	0.51487	0.835816	11736	1	-10698
USP54	4	0.025298	0.0040886	0.039326	1908	3	-30812	0.84025	0.86326	1.0	16053	0	-30812
TRIM24	4	0.025298	0.0040886	0.039326	1909	2	-0.3511	0.57376	0.45744	0.791716	11035	1	-0.3511
CAMK1D	4	0.025298	0.0040886	0.039326	1910	4	-27503	0.97048	0.99943	1.0	18310	0	-27503
GSTZ1	4	0.025298	0.0040886	0.039326	1911	2	-0.86934	0.66325	0.59012	0.894681	12569	1	-0.86934
POU2F3	4	0.025298	0.0040886	0.039326	1912	4	-26551	0.95893	0.99677	1.0	18124	0	-26551
CNTN3	4	0.025298	0.0040886	0.039326	1913	2	-0.21176	0.60926	0.49708	0.817628	11595	1	-0.21176
SERPINB4	4	0.025298	0.0040886	0.039326	1914	1	10863	0.15418	0.14064	0.556148	4754	2	10863
SDE2	4	0.025298	0.0040886	0.039326	1915	3	-2816	0.7509	0.71576	0.950193	14351	0	-2816
TMEM99	4	0.025298	0.0040886	0.039326	1916	1	0.87484	0.38228	0.31496	0.70788	8485	1	0.87484
CORT	4	0.025298	0.0040886	0.039326	1917	2	-0.83735	0.84636	0.87462	1.0	16171	0	-0.83735
SNED1	4	0.025298	0.0040886	0.039326	1918	2	-0.36437	0.77529	0.75704	0.975644	14830	0	-0.36437
ANLN	4	0.025298	0.0040886	0.039326	1919	3	-1026	0.68531	0.62165	0.913085	13007	0	-1026
TMBIM6	4	0.025298	0.0040886	0.039326	1920	3	-34339	0.65309	0.57429	0.884933	12375	1	-34339
FMN2	4	0.025298	0.0040886	0.039326	1921	3	-31649	0.058213	0.069433	0.514136	2478	1	-31649
OR5C1	4	0.025298	0.0040886	0.039326	1922	3	-3155	0.70375	0.64623	0.918738	13388	0	-3155
LOC101929983	4	0.025298	0.0040886	0.039326	1923	3	-32831	0.31915	0.28721	0.692063	7754	1	-32831
KLRF1	4	0.025298	0.0040886	0.039326	1924	3	-11789	0.70356	0.64623	0.918738	13383	0	-11789
PVR	4	0.025298	0.0040886	0.039326	1925	2	-0.17715	0.55123	0.43382	0.768953	10699	1	-0.17715
PRPF18	4	0.025298	0.0040886	0.039326	1926	3	-32831	0.023448	0.025135	0.373704	1225	1	-32831
ADM	4	0.025298	0.0040886	0.039326	1927	2	-0.06323	0.43805	0.34855	0.730053	9117	1	-0.06323
PLEKHA2	4	0.025298	0.0040886	0.039326	1928	3	-10237	0.90715	0.95851	1.0	17256	0	-10237
DNAJC1	4	0.025298	0.0040886	0.039326	1929	2	-0.27334	0.8079	0.81816	1.0	15454	0	-0.27334
JADE2	4	0.025298	0.0040886	0.039326	1930	3	-30354	0.6348	0.55446	0.878447	12035	1	-30354
DEFB105A	4	0.025298	0.0040886	0.039326	1931	2	-0.48144	0.14611	0.13367	0.55577	4562	1	-0.48144
LIPH	4	0.025298	0.0040886	0.039326	1932	2	-0.21445	0.44575	0.36043	0.738265	9214	1	-0.21445
AQP6	4	0.025298	0.0040886	0.039326	1933	2	-0.79915	0.22073	0.22687	0.676745	6296	1	-0.79915
ACY3	4	0.025298	0.0040886	0.039326	1934	3	-27663	0.84851	0.87627	1.0	16214	0	-27663
TAS2R41	4	0.025298	0.0040886	0.039326	1935	3	-27128	0.87133	0.91373	1.0	16627	0	-27128
FAM228B	4	0.025298	0.0040886	0.039326	1936	2	0.4551	0.01844	0.020787	0.373704	1014	2	0.4551
NME7	4	0.025298	0.0040886	0.039326	1937	2	0.34677	0.07729	0.085644	0.514136	2929	2	0.34677
CCDC73	4	0.025298	0.0040886	0.039326	1938	2	-0.5224	0.837	0.86052	1.0	15997	0	-0.5224
LY6H	4	0.025298	0.0040886	0.039326	1939	2	-0.50087	0.76065	0.731	0.95627	14546	0	-0.50087
NDEL1	4	0.025298	0.0040886	0.039326	1940	2	0.53527	0.031759	0.031142	0.380302	1557	2	0.53527
VASP	4	0.025298	0.0040886	0.039326	1941	2	-0.07561	0.25477	0.2702	0.692063	7064	2	-0.07561
TATDN3	4	0.025298	0.0040886	0.039326	1942	1	0.51848	0.82377	0.84132	1.0	15752	0	0.51848
PRICKLE4	4	0.025298	0.0040886	0.039326	1943	3	-26139	0.73387	0.67465	0.919302	14015	0	-26139
DACH1	4	0.025298	0.0040886	0.039326	1944	3	-32661	0.93503	0.98255	1.0	17750	0	-32661
HGD	4	0.025298	0.0040886	0.039326	1945	1	25154	0.011839	0.011076	0.294475	690	3	25154
BCL2L12	4	0.025298	0.0040886	0.039326	1946	2	-0.80772	0.54991	0.43184	0.768953	10679	1	-0.80772
DRAP1	4	0.025298	0.0040886	0.039326	1947	2	-0.39786	0.54295	0.42402	0.764284	10584	1	-0.39786
SLC52A3	4	0.025298	0.0040886	0.039326	1948	2	-0.31357	0.55774	0.43574	0.771229	10788	1	-0.31357
C1orf228	4	0.025371	0.0040925	0.039326	1949	4	-42781	0.97463	0.99983	1.0	18374	0	-42781
MMP2	4	0.025453	0.0040958	0.039326	1950	3	-30674	0.4487	0.36444	0.738265	9256	1	-30674
PSMB4	4	0.025453	0.0040958	0.039326	1951	2	-0.84504	0.69463	0.63312	0.914885	13201	0	-0.84504
HEY1	4	0.025453	0.0040958	0.039326	1952	3	-30674	0.70601	0.64989	0.918738	13432	0	-30674
FSCN2	4	0.025453	0.0040958	0.039326	1953	3	-26305	0.24679	0.25801	0.692063	6899	1	-26305
AMPD1	4	0.025453	0.0040958	0.039326	1954	2	-0.46351	0.015482	0.019237	0.373704	865	2	-0.46351
TICRR	4	0.025453	0.0040958	0.039326	1955	2	-0.12426	0.028259	0.028446	0.374832	1431	2	-0.12426
ERAL1	4	0.025453	0.0040958	0.039326	1956	3	-26305	0.2636	0.2734	0.692063	7167	1	-26305
BEST3	4	0.025453	0.0040958	0.039326	1957	3	-23159	0.56268	0.4397	0.771729	10865	1	-23159
FOXF1	4	0.025453	0.0040958	0.039326	1958	2	-0.11147	0.1913	0.17528	0.591552	5649	2	-0.11147
RGS1	4	0.025453	0.0040958	0.039326	1959	3	-22675	0.53108	0.412	0.756224	10388	1	-22675
PSG9	4	0.025453	0.0040958	0.039326	1960	3	-26305	0.93574	0.98275	1.0	17766	0	-26305
RBMY1F	4	0.025453	0.0040958	0.039326	1961	3	-29227	0.70245	0.64623	0.918738	13360	0	-29227
TMEM87A	4	0.025453	0.0040958	0.039326	1962	3	-30994	0.9208	0.97182	1.0	17490	0	-30994
NUP133	4	0.025453	0.0040958	0.039326	1963	3	-30994	0.16418	0.15034	0.574652	4995	1	-30994
SPDL1	4	0.025453	0.0040958	0.039326	1964	3	-18625	0.67113	0.59998	0.899677	12726	1	-18625
PCDH15	4	0.025453	0.0040958	0.039326	1965	3	-16999	0.92549	0.97526	1.0	17575	0	-16999
METTL9	4	0.025453	0.0040958	0.039326	1966	3	-30994	0.83911	0.86146	1.0	16032	0	-30994
CDK12	4	0.025453	0.0040958	0.039326	1967	2	-0.77281	0.29775	0.28129	0.692063	7528	1	-0.77281
PRPH2	4	0.025453	0.0040958	0.039326	1968	3	-29987	0.64115	0.56234	0.879138	12153	1	-29987
COPS4	4	0.025453	0.0040958	0.039326	1969	3	-19969	0.80855	0.81816	1.0	15469	0	-19969
ZNF646	4	0.025453	0.0040958	0.039326	1970	2	-0.23121	0.08894	0.094317	0.514136	3214	2	-0.23121
CMTM6	4	0.025453	0.0040958	0.039326	1971	3	-26882	0.24304	0.25429	0.692063	6793	1	-26882
TRAF2	4	0.025453	0.0040958	0.039326	1972	3	-31878	0.69219	0.63126	0.914885	13143	0	-31878
RBFA	4	0.025453	0.0040958	0.039326	1973	3	-3215	0.73285	0.67465	0.919302	13996	0	-3215
ELP4	4	0.025453	0.0040958	0.039326	1974	3	-30338	0.33153	0.28922	0.692063	7898	1	-30338
GARNL3	4	0.025453	0.0040958	0.039326	1975	3	-28815	0.19255	0.17624	0.591552	5676	1	-28815
TMEM263	4	0.025453	0.0040958	0.039326	1976	3	-18372	0.57271	0.45541	0.789375	11021	1	-18372
DENND4C	4	0.025453	0.0040958	0.039326	1977	2	-0.285	0.082318	0.086094	0.514136	3041	2	-0.285
SPG7	4	0.025453	0.0040958	0.039326	1978	2	-1088	0.87417	0.91654	1.0	16684	0	-1088
IGF2	4	0.025453	0.0040958	0.039326	1979	2	-0.83389	0.50613	0.39022	0.74264	10027	1	-0.83389
CLCC1	4	0.025453	0.0040958	0.039326	1980	2	-13211	0.072599	0.080061	0.514136	2812	1	-13211
SLC38A7	4	0.025453	0.0040958	0.039326	1981	2	0.16545	0.013079	0.014756	0.356286	756	2	0.16545
RNF148	4	0.025453	0.0040958	0.039326	1982	3	-26882	0.87181	0.91467	1.0	16632	0	-26882
KIAA0196	4	0.025453	0.0040958	0.039326	1983	3	-30674	0.32623	0.28721	0.692063	7833	1	-30674
SAA1	4	0.025453	0.0040958	0.039326	1984	3	-30338	0.14696	0.13367	0.55577	4578	1	-30338
BST1	4	0.025544	0.0040964	0.039326	1985	4	-49766	0.97446	0.99982	1.0	18372	0	-49766
ZBED8	4	0.025607	0.0041036	0.039326	1986	4	-53679	0.97439	0.99981	1.0	18370	0	-53679
PRSS42	4	0.025607	0.0041036	0.039326	1987	4	-45566	0.97439	0.99981	1.0	18371	0	-45566
TBC1D22B	4	0.025716	0.0041114	0.039326	1988	4	-50467	0.97428	0.99981	1.0	18368	0	-50467
SPACA4	4	0.025804	0.0041148	0.039326	1989	4	-50415	0.9742	0.9998	1.0	18367	0	-50415
C2orf76	4	0.025909	0.0041238	0.039326	1990	4	-52466	0.97409	0.99979	1.0	18364	0	-52466
SMIM14	4	0.025909	0.0041238	0.039326	1991	4	-53043	0.97409	0.99979	1.0	18365	0	-53043
FAM13C	4	0.025909	0.0041238	0.039326	1992	4	-55774	0.97409	0.99979	1.0	18366	0	-55774
GABRG3	4	0.025978	0.0041295	0.039326	1993	4	-15259	0.97402	0.99979	1.0	18363	0	-15259
SAT1	4	0.025978	0.0041295	0.039326	1994	4	-35512	0.97402	0.99979	1.0	18362	0	-35512
KY	4	0.026046	0.0041352	0.039326	1995	4	-54121	0.97395	0.99978	1.0	18361	0	-54121
CUL2	4	0.026091	0.0041357	0.039326	1996	4	-30323	0.97391	0.99978	1.0	18360	0	-30323
DNAJB6	4	0.026133	0.0041394	0.039326	1997	4	-52548	0.97387	0.99978	1.0	18358	0	-52548
LCMT2	4	0.026133	0.0041394	0.039326	1998	4	-37923	0.97387	0.99978	1.0	18359	0	-37923
RNASE9	4	0.026335	0.0041528	0.039326	1999	4	-40076	0.97366	0.99976	1.0	18357	0	-40076
[truncated: 17,115 more rows]

## Sheet: CRISPR screen_sgrna_summary
sgrna	Gene	control_count	treatment_count	control_mean	treat_mean	LFC	control_var	adj_var	score	p.low	p.high	p.twosided	FDR	high_in_treatment
s_22477	RFXANK	20231	24641000000	20231	24641000000	16824	6037000000000000	1940.3	55939	1	0	0	0	TRUE
s_22478	RFXANK	32171	28731000000	32171	28731000000	16402	8.1996e+16	6194.4	36505	1	0	0	0	TRUE
s_08440	HLA-DRB1	17246	1031000000	17246	1031000000	15786	1.0542e+16	1302.6	28565	1	0	0	0	TRUE
s_16081	RFXAP	75619	61236000000	75619	61236000000	16286	3.7236e+17	52900	26624	1	0	0	0	TRUE
s_11476	CIITA	49418	22436000000	49418	22436000000	15442	4.9866e+16	18179	16640	1	0	0	0	TRUE
s_16077	RFX5	0.99499	20277	0.99499	20277	13311	4051500000000	19824	14401	1	0	0	0	TRUE
s_03281	CIRBP	63016	84296	63016	84296	13495	69831000000000	108.58	8089	1	0	0	0	TRUE
s_71399	IYD	37146	6619900000	37146	6619900000	14083	4317100000000000	8882.7	7023.5	1	0	0	0	TRUE
s_16078	RFX5	17.91	2426500000	17.91	2426500000	13647	578720000000000	1431.2	6413.4	1	0	0	0	TRUE
s_25235	GTPBP1	14593	1655600000	14593	1655600000	13374	268990000000000	859.18	5647.8	1	0	0	0	TRUE
s_02144	CACNA1B	59699	48168	59699	48168	12755	22687000000000	95253	4934.8	1	0	0	0	TRUE
s_73876	PRR21	66332	54243	66332	54243	12795	28775000000000	122.99	4890.5	1	0	0	0	TRUE
s_22480	RFXANK	14925	1325100000	14925	1325100000	13023	171880000000000	908.6	4395.5	1	0	0	0	TRUE
s_35355	PABPC1	36161	11853	36161	11853	11953	1368200000000	76302	4290.4	1	0	0	0	TRUE
s_11473	CIITA	60694	6707900000	60694	6707900000	13408	4414800000000000	30455	3843.5	1	0	0	0	TRUE
s_16079	RFX5	55388	5436200000	55388	5436200000	13235	2896100000000000	24204	3493.9	1	0	0	0	TRUE
s_68203	EFCAB9	23216	8328.3	23216	8328.3	11292	670360000000	10632	2553.5	1	0	0	0	TRUE
s_60833	APOBEC3D	72966	30586	72966	30586	11848	9068900000000	155.16	2454.9	1	0	0	0	TRUE
s_22479	RFXANK	60031	3095700000	60031	3095700000	12308	931970000000000	29626	1798.2	1	0	0	0	TRUE
s_06621	NR5A1	132.33	8342400000	132.33	8342400000	12611	6786400000000000	2158200000	1795.5	1	0	0	0	TRUE
s_43854	BARX1	24543	94165	24543	94165	11848	85847000000000	3145.2	1678.6	1	0	0	0	TRUE
s_20987	TUBA1A	0.99499	2041.5	0.99499	2041.5	99997	39793000000	19824	1449.2	1	0	0	0	TRUE
s_43747	NKRF	0	879.45	0.33166	879.45	93689	7572800000	0.39404	1400.5	1	0	0	0	TRUE
s_23843	UNC119	0	858.26	0.33166	858.26	93337	7210400000	0.39404	1366.7	1	0	0	0	TRUE
s_02419	CBFB	16915	46554	16915	46554	11344	2086000000000	1241.1	1321	1	0	0	0	TRUE
s_16080	RFX5	26865	79391	26865	79391	11476	60748000000000	3943.6	1263.8	1	0	0	0	TRUE
s_49162	OR51G1	24875	61325	24875	61325	11211	3612000000000	3252.6	1074.8	1	0	0	0	TRUE
s_75538	ERICH4	0	603.96	0.33166	603.96	88275	3556200000	0.39404	961.61	1	0	0	0	TRUE
s_64523	EME2	2985	3924	2985	3924	99439	145580000000	18616	908.77	1	0	0	0	TRUE
s_44547	MAP3K7CL	18905	34055	18905	34055	10741	11062000000000	1638	840.97	1	0	0	0	TRUE
s_34173	KBTBD2	26533	3062.2	26533	3062.2	97116	88315000000	14278	809.69	1	0	0	0	TRUE
s_51739	GFOD2	102.15	2441800000	102.15	2441800000	11209	572340000000000	1126100000	727.34	1	0	0	0	TRUE
s_38982	MTFP1	26533	2687.8	26533	2687.8	95235	67767000000	14278	710.61	1	0	0	0	TRUE
s_39296	OAZ3	17578	25991	17578	25991	16711	6412200000000	1366	702.76	1	0	0	0	TRUE
s_26429	SEC16A	49749	5449.8	49749	5449.8	98333	279420000000	61431	694.69	1	0	0	0	TRUE
s_40652	GATAD2A	34161	58418	34161	58418	10698	32513000000000	7200	688.06	1	0	0	0	TRUE
s_46345	EPG5	45438	83099	45438	83099	10805	65896000000000	14725	684.44	1	0	0	0	TRUE
s_24273	PNMA1	23216	35259	23216	35259	10508	11809000000000	2737	673.52	1	0	0	0	TRUE
s_67025	CYP4X1	39799	4012.3	39799	4012.3	96544	151040000000	36196	666.23	1	0	0	0	TRUE
s_39163	CCZ1	44443	76484	44443	76484	10717	55741000000000	13929	647.67	1	0	0	0	TRUE
s_33056	ACAP2	86232	9412.6	86232	9412.6	9934	833630000000	233.66	615.2	1	0	0	0	TRUE
s_56178	ZNF585B	58373	97986	58373	97986	10689	91434000000000	27614	589.31	1	0	0	0	TRUE
s_31671	KDM4C	36161	1543.5	36161	1543.5	90127	22134000000	76302	558.04	1	0	0	0	TRUE
s_22916	RAB11A	16251	18500	16251	18500	10067	322500000000	1123.3	551.51	1	0	0	0	TRUE
s_16084	RFXAP	30845	40638	30845	40638	10318	15628000000000	5574.1	543.9	1	0	0	0	TRUE
s_18859	ZNF354A	30181	39134	30181	39134	10294	14486000000000	5278.6	538.22	1	0	0	0	TRUE
s_32522	SYNE1	29.85	38364	29.85	38364	47027	13918000000000	5134.4	534.98	1	0	0	0	TRUE
s_00897	APC	43448	60919	43448	60919	10421	35178000000000	13160	530.66	1	0	0	0	TRUE
s_09696	IREB2	25538	30173	25538	30173	10151	8588600000000	3474.1	511.49	1	0	0	0	TRUE
s_32000	LARP4B	0	321.41	0.33166	321.41	79195	99783	0.39404	511.49	1	0	0	0	TRUE
s_05614	EP300	33166	41705	33166	41705	10253	16438000000000	6685.8	509.64	1	0	0	0	TRUE
s_11475	CIITA	19236	20086	19236	20086	99551	3791700000000	1710.7	485.17	1	0	0	0	TRUE
s_49100	TTPAL	59699	4556.2	59699	4556.2	93528	192980000000	95253	466.22	1	0	0	0	TRUE
s_73327	PALM2-AKAP2	16583	1063.1	16583	1063.1	86449	10421000000	52248	464.37	1	0	0	0	TRUE
s_07840	GRPR	32835	36163	32835	36163	10062	12312000000000	6519.5	447.47	1	0	0	0	TRUE
s_51014	EFHC2	11608	9705.7	11608	9705.7	95885	878790000000	486.72	439.41	1	0	0	0	TRUE
s_43109	KBTBD4	82916	6392.8	82916	6392.8	94265	380110000000	212.2	438.28	1	0	0	0	TRUE
s_60153	EMB	35488	38936	35488	38936	43261	1427000000000	7921.6	437.07	1	0	0	0	TRUE
s_02138	CACNA1A	49749	3203.5	49749	3203.5	90669	94771000000	61431	408.09	1	0	0	0	TRUE
s_07906	GSTM5	79599	5612.2	79599	5612.2	92911	291980000000	191.98	404.48	1	0	0	0	TRUE
s_03442	CCR1	28191	26387	28191	26387	98201	6521300000000	4449.5	395.16	1	0	0	0	TRUE
s_45782	PTCHD2	0	247.23	0.33166	247.23	75423	58763	0.39404	393.33	1	0	0	0	TRUE
s_08434	HLA-DRA	53066	3288.2	53066	3288.2	90267	99703000000	71707	387.68	1	0	0	0	TRUE
s_17979	SOX3	2985	1649.4	2985	1649.4	8694	24953000000	18616	381.59	1	0	0	0	TRUE
s_18264	SSR2	13266	674.6	13266	674.6	81818	4151900000	33618	367.2	1	0	0	0	TRUE
s_58965	RAVER1	13266	667.53	13266	667.53	81666	4063400000	33618	363.35	1	0	0	0	TRUE
s_60481	VPS37A	38805	35284	38805	35284	97919	11649000000000	9911	354.03	1	0	0	0	TRUE
s_11474	CIITA	36483	31745	36483	31745	97261	9415700000000	8490.3	344.12	1	0	0	0	TRUE
s_21875	BCAR3	67327	67442	67327	67442	9947	42696000000000	39516	338.93	1	0	0	0	TRUE
s_24727	GRAP2	0	211.92	0.33166	211.92	73209	43040	0.39404	337.06	1	0	0	0	TRUE
s_73874	PRR21	17.91	12665	17.91	12665	93877	1487600000000	1431.2	334.31	1	0	0	0	TRUE
s_59842	LYPD6B	15.92	10779	15.92	10779	93155	1075700000000	1067	329.51	1	0	0	0	TRUE
s_45247	KIAA1147	0	204.85	0.33166	204.85	72722	40190	0.39404	325.81	1	0	0	0	TRUE
s_04074	CSNK1E	31508	24911	31508	24911	95818	5778600000000	5879.3	324.47	1	0	0	0	TRUE
s_65172	SENP5	12935	8155.2	12935	8155.2	91931	613950000000	636.58	322.71	1	0	0	0	TRUE
s_42714	CHRNA9	18241	12284	18241	12284	93185	1396700000000	1498.3	316.88	1	0	0	0	TRUE
s_13367	PBX3	30845	23477	30845	23477	9526	5125400000000	5574.1	314.04	1	0	0	0	TRUE
s_76126	CKLF-CMTM1	0	194.26	0.33166	194.26	7196	36099	0.39404	308.93	1	0	0	0	TRUE
s_14045	PKLR	0.33166	190.72	0.33166	190.72	71697	33107	0.39404	303.3	1	0	0	0	TRUE
s_40712	GDAP2	53066	2546.5	53066	2546.5	8658	59139000000	71707	300.1	1	0	0	0	TRUE
s_06657	FUT5	0	187.19	0.33166	187.19	71428	33494	0.39404	297.68	1	0	0	0	TRUE
s_10338	KRT8	69649	3486	69649	3486	87741	111060000000	138.51	295.61	1	0	0	0	TRUE
s_08041	GYPC	66664	57553	66664	57553	97323	30941000000000	38545	292.8	1	0	0	0	TRUE
s_26634	FGFBP1	12603	6929.6	12603	6929.6	89929	440780000000	596.83	283.14	1	0	0	0	TRUE
s_62695	MGAT4D	0	176.6	0.33166	176.6	70592	29771	0.39404	280.8	1	0	0	0	TRUE
s_44970	PARP11	0	176.6	0.33166	176.6	70592	29771	0.39404	280.8	1	0	0	0	TRUE
s_08438	HLA-DRB1	17246	10006	17246	10006	90992	921160000000	1302.6	276.76	1	0	0	0	TRUE
s_51576	OR2L5	0	173.06	0.33166	173.06	70302	28579	0.39404	275.17	1	0	0	0	TRUE
s_34578	WIPI2	0	173.06	0.33166	173.06	70302	28579	0.39404	275.17	1	0	0	0	TRUE
s_42439	SLC22A15	0	169.53	0.33166	169.53	70007	27411	0.39404	269.54	1	0	0	0	TRUE
s_52493	FRMD8	0	169.53	0.33166	169.53	70007	27411	0.39404	269.54	1	0	0	0	TRUE
s_59266	C1orf194	89549	4294.8	89549	4294.8	87533	168270000000	256.39	267.66	1	0	0	0	TRUE
s_76071	TMEM56-RWDD3	99499	4626.8	99499	4626.8	87233	195020000000	332.42	253.22	1	0	0	0	TRUE
s_46329	ANO8	18241	9815.2	18241	9815.2	89948	883560000000	1498.3	253.1	1	0	0	0	TRUE
s_25966	DHX38	0	158.94	0.33166	158.94	69081	24055	0.39404	252.67	1	0	0	0	TRUE
s_74404	POTEJ	0	158.94	0.33166	158.94	69081	24055	0.39404	252.67	1	0	0	0	TRUE
s_19271	SEC62	0	158.94	0.33166	158.94	69081	24055	0.39404	252.67	1	0	0	0	TRUE
s_36354	C16orf72	0	158.94	0.33166	158.94	69081	24055	0.39404	252.67	1	0	0	0	TRUE
s_53486	SARNP	14593	7378.2	14593	7378.2	88864	497880000000	859.18	251.22	1	0	0	0	TRUE
s_30880	IKZF3	26533	921.83	26533	921.83	79807	7618700000	14278	243.26	1	0	0	0	TRUE
s_56911	KTI12	0	151.87	0.33166	151.87	6843	21940	0.39404	241.41	1	0	0	0	TRUE
s_11042	MAGEB1	0	151.87	0.33166	151.87	6843	21940	0.39404	241.41	1	0	0	0	TRUE
s_21703	HIST1H3D	0.33166	151.87	0.33166	151.87	6843	20758	0.39404	241.41	1	0	0	0	TRUE
s_60739	GAB3	43116	1522.3	43116	1522.3	81638	20808000000	43709	229.6	1	0	0	0	TRUE
s_32959	DAAM2	43779	26624	43779	26624	92157	6535100000000	13413	229.5	1	0	0	0	TRUE
s_53981	HES7	23216	745.24	23216	745.24	78116	4956100000	10632	227.85	1	0	0	0	TRUE
s_20111	VCP	0	141.28	0.33166	141.28	67393	18952	0.39404	224.53	1	0	0	0	TRUE
s_55721	AP5B1	0	141.28	0.33166	141.28	67393	18952	0.39404	224.53	1	0	0	0	TRUE
s_52426	FAM57B	79599	3094	79599	3094	84322	86434000000	191.98	222.73	1	0	0	0	TRUE
s_08470	HLX	46433	1596.4	46433	1596.4	8145	22854000000	52109	220.51	1	0	0	0	TRUE
s_46343	EPG5	35156	19394	35156	19394	90672	3453600000000	7737.3	220.08	1	0	0	0	TRUE
s_51506	CLPTM1L	33166	1073.7	33166	1073.7	79598	10299000000	23688	219.93	1	0	0	0	TRUE
s_57041	KLHDC7B	26533	826.47	26533	826.47	78234	6086500000	14278	218.02	1	0	0	0	TRUE
s_01963	C1QB	36161	600.43	36161	600.43	76521	3204500000	76302	216.65	1	0	0	0	TRUE
s_71551	OR51D1	43116	1434	43116	1434	80776	18404000000	43709	216.24	1	0	0	0	TRUE
s_09967	KCNA7	20563	9613.9	20563	9613.9	88006	842380000000	2020.8	213.41	1	0	0	0	TRUE
s_05574	EN1	0.99499	300.21	0.99499	300.21	72383	79916	19824	212.51	1	0	0	0	TRUE
s_64526	NLRC3	16583	7300.5	16583	7300.5	86979	484350000000	1181.3	211.93	1	0	0	0	TRUE
s_43905	PCDHGB1	21.89	9956.5	21.89	9956.5	87649	902340000000	2362.5	204.39	1	0	0	0	TRUE
s_14897	MAPK7	0	127.15	0.33166	127.15	65885	15309	0.39404	202.03	1	0	0	0	TRUE
s_33131	DNPEP	23548	10748	23548	10748	87743	1051600000000	2835.8	201.38	1	0	0	0	TRUE
s_04682	DEFA3	92202	58358	92202	58358	92904	31451000000000	87051	197.48	1	0	0	0	TRUE
s_14424	PON2	12272	4662.1	12272	4662.1	84568	196070000000	558.61	196.74	1	0	0	0	TRUE
s_30669	USP18	39799	1186.7	39799	1186.7	78979	12525000000	36196	196.59	1	0	0	0	TRUE
s_16402	RPL27A	0	123.62	0.33166	123.62	65481	14460	0.39404	196.4	1	0	0	0	TRUE
s_17192	SRSF1	0	123.62	0.33166	123.62	65481	14460	0.39404	196.4	1	0	0	0	TRUE
s_08439	HLA-DRB1	35.82	17631	35.82	17631	89035	2840200000000	8108.6	195.4	1	0	0	0	TRUE
s_37294	CALY	0	120.09	0.33166	120.09	65067	13635	0.39404	190.77	1	0	0	0	TRUE
s_64091	GLIS3	0.33166	120.09	0.33166	120.09	65067	12811	0.39404	190.77	1	0	0	0	TRUE
s_04736	DGUOK	0	120.09	0.33166	120.09	65067	13635	0.39404	190.77	1	0	0	0	TRUE
s_51743	COL21A1	43362	8211.7	43362	8211.7	86182	610910000000	1861.8	189.85	1	0	0	0	TRUE
s_37829	APH1A	96182	3302.3	96182	3302.3	82812	97837000000	305.74	188.31	1	0	0	0	TRUE
s_21840	SLC25A11	36483	17257	36483	17257	88468	2715900000000	8490.3	186.89	1	0	0	0	TRUE
s_72104	HEATR4	0	116.55	0.33166	116.55	64639	12834	0.39404	185.15	1	0	0	0	TRUE
s_22350	RRP1	0	116.55	0.33166	116.55	64639	12834	0.39404	185.15	1	0	0	0	TRUE
s_34820	FAM50B	42453	20581	42453	20581	88877	3867200000000	12417	184.31	1	0	0	0	TRUE
s_09228	IFNA8	0.66332	183.66	0.66332	183.66	67947	29678	10196	181.23	1	0	0	0	TRUE
s_38553	DACT1	10282	3433	10282	3433	82498	105580000000	360.46	180.28	1	0	0	0	TRUE
s_64851	LYRM9	0	113.02	0.33166	113.02	64199	12058	0.39404	179.52	1	0	0	0	TRUE
s_27302	TSHZ1	0	113.02	0.33166	113.02	64199	12058	0.39404	179.52	1	0	0	0	TRUE
s_44680	XAB2	0	113.02	0.33166	113.02	64199	12058	0.39404	179.52	1	0	0	0	TRUE
s_57128	CGB2	0	109.49	0.33166	109.49	63745	11306	0.39404	173.89	1	0	0	0	TRUE
s_61987	ATP8B3	0	109.49	0.33166	109.49	63745	11306	0.39404	173.89	1	0	0	0	TRUE
s_21859	TAGLN2	0	109.49	0.33166	109.49	63745	11306	0.39404	173.89	1	0	0	0	TRUE
s_54837	ZCCHC3	0.33166	109.49	0.33166	109.49	63745	10591	0.39404	173.89	1	0	0	0	TRUE
s_76228	FSBP	0	109.49	0.33166	109.49	63745	11306	0.39404	173.89	1	0	0	0	TRUE
s_49006	FKRP	12935	4245.4	12935	4245.4	82514	161310000000	636.58	167.75	1	0	0	0	TRUE
s_36107	APOBEC3C	20231	7406.4	20231	7406.4	84466	493940000000	1940.3	167.68	1	0	0	0	TRUE
s_64715	CREG2	26533	632.21	26533	632.21	74374	3503200000	14278	166.61	1	0	0	0	TRUE
s_22027	FKBP6	20231	7357	20231	7357	8437	48720000000	1940.3	166.56	1	0	0	0	TRUE
s_40036	FAM64A	11277	3475.4	11277	3475.4	81456	107720000000	452.99	162.76	1	0	0	0	TRUE
s_21268	KMT2D	89881	46572	89881	46572	90013	19863000000000	81648	162.67	1	0	0	0	TRUE
s_75203	SMIM10L1	0.33166	102.43	0.33166	102.43	62792	9230.4	0.39404	162.64	1	0	0	0	TRUE
s_28095	N4BP2L2	0	102.43	0.33166	102.43	62792	9874.8	0.39404	162.64	1	0	0	0	TRUE
s_51852	CCNL2	76282	2143.9	76282	2143.9	79576	40759000000	172.97	162.43	1	0	0	0	TRUE
s_07030	MSTN	0.99499	229.58	0.99499	229.58	68527	45936	19824	162.35	1	0	0	0	TRUE
s_44237	PRMT8	26533	614.55	26533	614.55	73965	330400000	14278	161.94	1	0	0	0	TRUE
s_17430	SLC1A2	0	98894	0.33166	98894	62291	9196	0.39404	157.01	1	0	0	0	TRUE
s_07216	GLG1	0	98894	0.33166	98894	62291	9196	0.39404	157.01	1	0	0	0	TRUE
s_40697	ASPN	0	98894	0.33166	98894	62291	9196	0.39404	157.01	1	0	0	0	TRUE
s_54474	CIRH1A	0	98894	0.33166	98894	62291	9196	0.39404	157.01	1	0	0	0	TRUE
s_20401	YWHAH	0	98894	0.33166	98894	62291	9196	0.39404	157.01	1	0	0	0	TRUE
s_11131	MARK3	0	98894	0.33166	98894	62291	9196	0.39404	157.01	1	0	0	0	TRUE
s_35129	IL36RN	0	98894	0.33166	98894	62291	9196	0.39404	157.01	1	0	0	0	TRUE
s_31884	GRAMD4	0.33166	98894	0.33166	98894	62291	8585.6	0.39404	157.01	1	0	0	0	TRUE
s_16220	RNH1	0	95362	0.33166	95362	61772	8541.6	0.39404	151.39	1	0	0	0	TRUE
s_05616	EP300	18241	5742.9	18241	5742.9	82217	294530000000	1498.3	147.9	1	0	0	0	TRUE
s_66825	KANK3	66332	1645.9	66332	1645.9	77532	23835000000	122.99	147.81	1	0	0	0	TRUE
s_69102	ZC3H12D	30513	10907	30513	10907	84352	1069800000000	5425.1	147.66	1	0	0	0	TRUE
s_46272	CWC22	21558	7010.9	21558	7010.9	46966	439770000000	2274	146.57	1	0	0	0	TRUE
s_64019	PKD1L1	0.66332	148.34	0.66332	148.34	64884	19085	10196	146.25	1	0	0	0	TRUE
s_55977	ELMSAN1	53066	1239.7	53066	1239.7	76201	13467000000	71707	145.77	1	0	0	0	TRUE
s_22807	CTNNAL1	0	91.83	0.33166	91.83	61233	7911.5	0.39404	145.76	1	0	0	0	TRUE
s_15162	PSMA6	0	91.83	0.33166	91.83	61233	7911.5	0.39404	145.76	1	0	0	0	TRUE
s_26569	USP3	23216	476.81	23216	476.81	71684	1971800000	10632	145.52	1	0	0	0	TRUE
s_39319	VPS29	93197	43142	93197	43142	88392	16959000000000	89430	143.95	1	0	0	0	TRUE
s_16444	RPL38	0.33166	88298	0.33166	88298	60673	6793.3	0.39404	140.13	1	0	0	0	TRUE
s_63198	FAAH2	0	88298	0.33166	88298	60673	7305.7	0.39404	140.13	1	0	0	0	TRUE
s_63995	GALNTL5	0	88298	0.33166	88298	60673	7305.7	0.39404	140.13	1	0	0	0	TRUE
s_37812	NDUFAF1	0	88298	0.33166	88298	60673	7305.7	0.39404	140.13	1	0	0	0	TRUE
s_73341	LRRC37A2	0	88298	0.33166	88298	60673	7305.7	0.39404	140.13	1	0	0	0	TRUE
s_06684	FYB	0.66332	141.28	0.66332	141.28	64185	17251	10196	139.25	1	0	0	0	TRUE
s_03305	ERCC8	36161	384.98	36161	384.98	70122	1279300000	76302	138.65	1	0	0	0	TRUE
s_04066	CSNK1A1	13266	3606.1	13266	3606.1	79821	115120000000	677.9	137.99	1	0	0	0	TRUE
s_73555	PEF1	95.85	42786	95.85	42786	87872	16651000000000	95965	137.81	1	0	0	0	TRUE
s_26241	PJA2	29518	9624.5	29518	9624.5	83011	828950000000	4992.7	135.79	1	0	0	0	TRUE
s_57176	BTBD9	0.66332	137.75	0.66332	137.75	63822	16369	10196	135.76	1	0	0	0	TRUE
s_16083	RFXAP	72966	1695.3	72966	1695.3	76757	25182000000	155.16	135.52	1	0	0	0	TRUE
s_44865	PDXP	0	84766	0.33166	84766	60091	6724.2	0.39404	134.51	1	0	0	0	TRUE
s_42354	ACER3	0	84766	0.33166	84766	60091	6724.2	0.39404	134.51	1	0	0	0	TRUE
s_25147	TP53I11	0	84766	0.33166	84766	60091	6724.2	0.39404	134.51	1	0	0	0	TRUE
s_37198	SMARCAL1	0	84766	0.33166	84766	60091	6724.2	0.39404	134.51	1	0	0	0	TRUE
s_34522	TBC1D29	0	84766	0.33166	84766	60091	6724.2	0.39404	134.51	1	0	0	0	TRUE
s_59980	TMEM42	0	84766	0.33166	84766	60091	6724.2	0.39404	134.51	1	0	0	0	TRUE
s_08197	HBB	0	84766	0.33166	84766	60091	6724.2	0.39404	134.51	1	0	0	0	TRUE
s_16618	RPS27A	0	84766	0.33166	84766	60091	6724.2	0.39404	134.51	1	0	0	0	TRUE
s_31190	TRAK1	0	84766	0.33166	84766	60091	6724.2	0.39404	134.51	1	0	0	0	TRUE
s_67923	C1orf185	13266	247.23	13266	247.23	67373	52536	33618	134.12	1	0	0	0	TRUE
s_77305	Non-TargetingControl	74624	30396	74624	30396	86509	8366100000000	51169	134.04	1	0	0	0	TRUE
s_48472	ZSWIM4	82252	34221	82252	34221	86832	10615000000000	65341	133.55	1	0	0	0	TRUE
s_17199	SRSF3	0.66332	134.21	0.66332	134.21	6345	15510	10196	132.26	1	0	0	0	TRUE
s_15662	RAB5A	12272	3118.7	12272	3118.7	78769	85741000000	558.61	131.43	1	0	0	0	TRUE
s_12886	NTHL1	2985	561.58	2985	561.58	71413	2719400000	18616	129.46	1	0	0	0	TRUE
s_65881	FAM200A	0	81234	0.33166	81234	59484	6167.1	0.39404	128.88	1	0	0	0	TRUE
s_28032	UBAC1	0	81234	0.33166	81234	59484	6167.1	0.39404	128.88	1	0	0	0	TRUE
s_43183	HHAT	0	81234	0.33166	81234	59484	6167.1	0.39404	128.88	1	0	0	0	TRUE
s_02452	CBS	0	81234	0.33166	81234	59484	6167.1	0.39404	128.88	1	0	0	0	TRUE
s_60356	C6orf141	0	81234	0.33166	81234	59484	6167.1	0.39404	128.88	1	0	0	0	TRUE
s_45674	INTS2	0	81234	0.33166	81234	59484	6167.1	0.39404	128.88	1	0	0	0	TRUE
s_60557	C9orf116	0	81234	0.33166	81234	59484	6167.1	0.39404	128.88	1	0	0	0	TRUE
s_14028	PITX1	0	81234	0.33166	81234	59484	6167.1	0.39404	128.88	1	0	0	0	TRUE
s_50947	ACSF2	86564	34362	86564	34362	86163	10678000000000	74289	125.75	1	0	0	0	TRUE
s_23814	CDY1	36161	342.6	36161	342.6	68444	1004200000	76302	123.31	1	0	0	0	TRUE
s_05119	DTNA	0	77702	0.33166	77702	58851	5634.2	0.39404	123.26	1	0	0	0	TRUE
s_08398	MNX1	0	77702	0.33166	77702	58851	5634.2	0.39404	123.26	1	0	0	0	TRUE
s_20882	ZNF236	0	77702	0.33166	77702	58851	5634.2	0.39404	123.26	1	0	0	0	TRUE
s_60734	FOXR2	0	77702	0.33166	77702	58851	5634.2	0.39404	123.26	1	0	0	0	TRUE
s_66842	FRMD3	0.33166	77702	0.33166	77702	58851	5213.8	0.39404	123.26	1	0	0	0	TRUE
s_22256	AGPS	0	77702	0.33166	77702	58851	5634.2	0.39404	123.26	1	0	0	0	TRUE
s_45828	NLGN2	0.33166	77702	0.33166	77702	58851	5213.8	0.39404	123.26	1	0	0	0	TRUE
s_12820	NPY1R	0	77702	0.33166	77702	58851	5634.2	0.39404	123.26	1	0	0	0	TRUE
s_29435	PROKR1	20895	5495.7	20895	5495.7	79718	266870000000	2103.2	119.38	1	0	0	0	TRUE
s_32228	ATP11A	38473	11779	38473	11779	82213	1237300000000	9699.9	119.21	1	0	0	0	TRUE
s_39887	NLGN3	36151	10868	36151	10868	81926	1052100000000	8298.1	118.91	1	0	0	0	TRUE
s_58079	MORN4	59699	1165.5	59699	1165.5	73869	11758000000	95253	118.81	1	0	0	0	TRUE
s_32806	RHOQ	46433	861.79	46433	861.79	72563	6402300000	52109	118.74	1	0	0	0	TRUE
s_06585	FRG1	0	74.17	0.33166	74.17	58189	5125.6	0.39404	117.63	1	0	0	0	TRUE
s_57753	RAB39B	0	74.17	0.33166	74.17	58189	5125.6	0.39404	117.63	1	0	0	0	TRUE
s_32323	NUP160	0	74.17	0.33166	74.17	58189	5125.6	0.39404	117.63	1	0	0	0	TRUE
s_47506	P3H1	0.33166	74.17	0.33166	74.17	58189	4734.5	0.39404	117.63	1	0	0	0	TRUE
s_69064	TMPRSS11A	0	74.17	0.33166	74.17	58189	5125.6	0.39404	117.63	1	0	0	0	TRUE
s_15615	PYGL	0	74.17	0.33166	74.17	58189	5125.6	0.39404	117.63	1	0	0	0	TRUE
s_12152	PPP1R12A	0	74.17	0.33166	74.17	58189	5125.6	0.39404	117.63	1	0	0	0	TRUE
s_73496	CT45A6	0	74.17	0.33166	74.17	58189	5125.6	0.39404	117.63	1	0	0	0	TRUE
s_69604	CDKL4	0.33166	74.17	0.33166	74.17	58189	4734.5	0.39404	117.63	1	0	0	0	TRUE
s_61253	C11orf84	0.33166	74.17	0.33166	74.17	58189	4734.5	0.39404	117.63	1	0	0	0	TRUE
s_52257	NUDT12	0.33166	74.17	0.33166	74.17	58189	4734.5	0.39404	117.63	1	0	0	0	TRUE
s_17008	CCL17	0	74.17	0.33166	74.17	58189	5125.6	0.39404	117.63	1	0	0	0	TRUE
s_53275	ALKBH7	0.33166	74.17	0.33166	74.17	58189	4734.5	0.39404	117.63	1	0	0	0	TRUE
s_18624	TACR3	0	74.17	0.33166	74.17	58189	5125.6	0.39404	117.63	1	0	0	0	TRUE
s_18642	TAF4B	24875	6668.3	24875	6668.3	80098	393380000000	3252.6	116.49	1	0	0	0	TRUE
s_19478	TPD52L1	47428	14852	47428	14852	82607	1969600000000	16397	115.61	1	0	0	0	TRUE
s_74063	PABPC1L2B	72966	1444.6	72966	1444.6	74449	18083000000	155.16	115.38	1	0	0	0	TRUE
s_18316	SSX4	0.66332	116.55	0.66332	116.55	61431	11571	10196	114.77	1	0	0	0	TRUE
s_76528	Non-TargetingControl	38141	11140	38141	11140	81529	1103600000000	9491.5	113.95	1	0	0	0	TRUE
s_75457	FAM159B	2985	487.41	2985	487.41	69374	2026300000	18616	112.27	1	0	0	0	TRUE
s_14493	PPARD	46764	14163	46764	14163	82121	1787700000000	15828	112.21	1	0	0	0	TRUE
s_25344	VPS9D1	0	70638	0.33166	70638	57494	4641.3	0.39404	112	1	0	0	0	TRUE
s_22846	HRK	0	70638	0.33166	70638	57494	4641.3	0.39404	112	1	0	0	0	TRUE
s_16380	RPL23A	0	70638	0.33166	70638	57494	4641.3	0.39404	112	1	0	0	0	TRUE
s_69207	TCEAL5	0.33166	70638	0.33166	70638	57494	4278.6	0.39404	112	1	0	0	0	TRUE
s_28549	CCT2	0	70638	0.33166	70638	57494	4641.3	0.39404	112	1	0	0	0	TRUE
s_75640	USP17L22	0	70638	0.33166	70638	57494	4641.3	0.39404	112	1	0	0	0	TRUE
s_37162	STOML2	0	70638	0.33166	70638	57494	4641.3	0.39404	112	1	0	0	0	TRUE
s_38165	ZNF219	0	70638	0.33166	70638	57494	4641.3	0.39404	112	1	0	0	0	TRUE
s_72764	C10orf55	0	70638	0.33166	70638	57494	4641.3	0.39404	112	1	0	0	0	TRUE
s_19033	TFDP1	0	70638	0.33166	70638	57494	4641.3	0.39404	112	1	0	0	0	TRUE
s_20810	ZNF202	0	70638	0.33166	70638	57494	4641.3	0.39404	112	1	0	0	0	TRUE
s_49441	OCEL1	0	70638	0.33166	70638	57494	4641.3	0.39404	112	1	0	0	0	TRUE
s_11019	MAGEA6	0	70638	0.33166	70638	57494	4641.3	0.39404	112	1	0	0	0	TRUE
s_63671	ZNF540	46433	812.34	46433	812.34	71712	5663300000	52109	111.89	1	0	0	0	TRUE
s_43987	PCDHB4	49749	875.92	49749	875.92	71974	6588300000	61431	111.12	1	0	0	0	TRUE
s_46089	ARHGAP23	26533	420.3	26533	420.3	68495	1502700000	14278	110.53	1	0	0	0	TRUE
s_25644	EDEM1	0.99499	155.4	0.99499	155.4	62928	20437	19824	109.67	1	0	0	0	TRUE
s_66264	FNDC5	15.92	3588.4	15.92	3588.4	77289	112640000000	1067	109.37	1	0	0	0	TRUE
s_21525	COLQ	72966	23964	72966	23964	83399	5141800000000	48361	108.64	1	0	0	0	TRUE
s_18328	ST13	10282	2045	10282	2045	75027	36259000000	360.46	107.17	1	0	0	0	TRUE
s_05405	EGR4	0.99499	151.87	0.99499	151.87	62598	19481	19824	107.16	1	0	0	0	TRUE
s_37336	IRX4	23216	349.66	23216	349.66	6722	1035300000	10632	106.53	1	0	0	0	TRUE
s_17078	CXCL12	0	67107	0.33166	67107	56765	4181.2	0.39404	106.38	1	0	0	0	TRUE
s_45158	PHTF2	0	67107	0.33166	67107	56765	4181.2	0.39404	106.38	1	0	0	0	TRUE
s_15196	PSMB7	0.33166	67107	0.33166	67107	56765	3846.3	0.39404	106.38	1	0	0	0	TRUE
s_28878	DCTN6	0	67107	0.33166	67107	56765	4181.2	0.39404	106.38	1	0	0	0	TRUE
s_28527	SLU7	0.33166	67107	0.33166	67107	56765	3846.3	0.39404	106.38	1	0	0	0	TRUE
s_64857	C17orf74	0.33166	67107	0.33166	67107	56765	3846.3	0.39404	106.38	1	0	0	0	TRUE
s_63007	TMEM65	0	67107	0.33166	67107	56765	4181.2	0.39404	106.38	1	0	0	0	TRUE
s_27529	SPRY2	0	67107	0.33166	67107	56765	4181.2	0.39404	106.38	1	0	0	0	TRUE
s_32218	BOP1	0	67107	0.33166	67107	56765	4181.2	0.39404	106.38	1	0	0	0	TRUE
s_63241	AWAT2	0	67107	0.33166	67107	56765	4181.2	0.39404	106.38	1	0	0	0	TRUE
s_41804	MRPS10	0	67107	0.33166	67107	56765	4181.2	0.39404	106.38	1	0	0	0	TRUE
s_66075	NYAP1	0	67107	0.33166	67107	56765	4181.2	0.39404	106.38	1	0	0	0	TRUE
s_75227	TCF24	0	67107	0.33166	67107	56765	4181.2	0.39404	106.38	1	0	0	0	TRUE
s_71233	BOLA3	0	67107	0.33166	67107	56765	4181.2	0.39404	106.38	1	0	0	0	TRUE
s_62581	MB21D2	56383	960.68	56383	960.68	71786	7906300000	82971	104.85	1	0	0	0	TRUE
s_54381	ADO	0.66332	105.96	0.66332	105.96	60068	9488.5	10196	104.28	1	0	0	0	TRUE
s_06795	GABRP	36161	289.62	36161	289.62	66028	70791	76302	104.13	1	0	0	0	TRUE
s_77100	Non-TargetingControl	30845	7600.7	30845	7600.7	78991	508410000000	5574.1	101.39	1	0	0	0	TRUE
s_19985	UMPS	82916	1483.4	82916	1483.4	73198	18928000000	212.2	101.26	1	0	0	0	TRUE
s_75936	TPBGL	0	63575	0.33166	63575	55997	3745.3	0.39404	100.75	1	0	0	0	TRUE
s_22308	CDC14A	0	63575	0.33166	63575	55997	3745.3	0.39404	100.75	1	0	0	0	TRUE
s_65663	JMJD1C	0	63575	0.33166	63575	55997	3745.3	0.39404	100.75	1	0	0	0	TRUE
s_69288	MS4A10	0	63575	0.33166	63575	55997	3745.3	0.39404	100.75	1	0	0	0	TRUE
s_18109	SPRR2B	0	63575	0.33166	63575	55997	3745.3	0.39404	100.75	1	0	0	0	TRUE
s_45498	KIAA1143	0	63575	0.33166	63575	55997	3745.3	0.39404	100.75	1	0	0	0	TRUE
s_35841	GPR162	0	63575	0.33166	63575	55997	3745.3	0.39404	100.75	1	0	0	0	TRUE
s_13489	PDCD2	0	63575	0.33166	63575	55997	3745.3	0.39404	100.75	1	0	0	0	TRUE
s_71316	ANKUB1	0	63575	0.33166	63575	55997	3745.3	0.39404	100.75	1	0	0	0	TRUE
s_64522	EME2	0	63575	0.33166	63575	55997	3745.3	0.39404	100.75	1	0	0	0	TRUE
s_20002	NR1H2	0	63575	0.33166	63575	55997	3745.3	0.39404	100.75	1	0	0	0	TRUE
s_60304	IRAK1BP1	59699	988.94	59699	988.94	71501	8360400000	95253	100.72	1	0	0	0	TRUE
s_26500	ARHGAP25	51408	14223	51408	14223	80843	1793300000000	20072	100.03	1	0	0	0	TRUE
s_00739	AMPD1	16583	229.58	16583	229.58	64386	44260	52248	99711	1	0	0	0	TRUE
s_19508	TPM4	0.99499	137.75	0.99499	137.75	61199	15890	19824	97124	1	0	0	0	TRUE
s_61668	CDRT15	99499	1766	99499	1766	73342	26813000000	332.42	96313	1	0	0	0	TRUE
s_45806	ZNF624	0	60043	0.33166	60043	55185	3333.7	0.39404	95123	1	0	0	0	TRUE
s_19486	TPH1	0	60043	0.33166	60043	55185	3333.7	0.39404	95123	1	0	0	0	TRUE
s_24465	COPS2	0	60043	0.33166	60043	55185	3333.7	0.39404	95123	1	0	0	0	TRUE
s_62580	CCDC12	0	60043	0.33166	60043	55185	3333.7	0.39404	95123	1	0	0	0	TRUE
s_25484	RALGPS1	0.33166	60043	0.33166	60043	55185	3052	0.39404	95123	1	0	0	0	TRUE
s_27702	ZNF267	0.33166	60043	0.33166	60043	55185	3052	0.39404	95123	1	0	0	0	TRUE
s_62575	BTLA	0	60043	0.33166	60043	55185	3333.7	0.39404	95123	1	0	0	0	TRUE
s_56168	MRPS36	0	60043	0.33166	60043	55185	3333.7	0.39404	95123	1	0	0	0	TRUE
s_03619	COL9A1	0	60043	0.33166	60043	55185	3333.7	0.39404	95123	1	0	0	0	TRUE
s_10506	RPSA	0	60043	0.33166	60043	55185	3333.7	0.39404	95123	1	0	0	0	TRUE
s_44785	BBX	27196	6050.2	27196	6050.2	77456	319970000000	4066.7	94448	1	0	0	0	TRUE
s_48820	PRRG4	36161	261.36	36161	261.36	64553	57138	76302	93898	1	0	0	0	TRUE
s_15264	PSMD8	0.66332	95362	0.66332	95362	58563	7616.5	10196	93783	1	0	0	0	TRUE
s_05579	EN2	0.66332	95362	0.66332	95362	58563	7616.5	10196	93783	1	0	0	0	TRUE
s_61169	CACUL1	108.79	33811	108.79	33811	82667	10204000000000	131900000	92798	1	0	0	0	TRUE
s_09912	JARID2	33.83	7717.3	33.83	7717.3	77918	52150000000	7026	91664	1	0	0	0	TRUE
s_06699	G6PC	66332	1017.2	66332	1017.2	70595	8791300000	122.99	91122	1	0	0	0	TRUE
s_35177	RGS17	66332	1013.7	66332	1013.7	70545	8727900000	122.99	90804	1	0	0	0	TRUE
s_25637	EMC2	56383	830	56383	830	69679	5832500000	82971	90502	1	0	0	0	TRUE
s_24647	PPT2	16583	208.38	16583	208.38	62995	36151	52248	90.44	1	0	0	0	TRUE
s_30034	TOPBP1	0.66332	91.83	0.66332	91.83	58024	7039.1	10196	90285	1	0	0	0	TRUE
s_22624	EIF3H	50744	12609	50744	12609	79289	1.4e+08	19429	90097	1	0	0	0	TRUE
s_45826	LRRC7	36161	250.77	36161	250.77	63958	52403	76302	90062	1	0	0	0	TRUE
s_12154	PPP1R12B	26533	342.6	26533	342.6	65554	98113	14278	89964	1	0	0	0	TRUE
s_51408	APOL6	0	56511	0.33166	56511	54325	2946.2	0.39404	89496	1	0	0	0	TRUE
s_12065	MYL2	0	56511	0.33166	56511	54325	2946.2	0.39404	89496	1	0	0	0	TRUE
s_26556	HS3ST3A1	0	56511	0.33166	56511	54325	2946.2	0.39404	89496	1	0	0	0	TRUE
s_25161	NRG2	0	56511	0.33166	56511	54325	2946.2	0.39404	89496	1	0	0	0	TRUE
s_43052	KDM4D	0	56511	0.33166	56511	54325	2946.2	0.39404	89496	1	0	0	0	TRUE
s_59059	NLRP13	0	56511	0.33166	56511	54325	2946.2	0.39404	89496	1	0	0	0	TRUE
s_15273	PSMD11	0	56511	0.33166	56511	54325	2946.2	0.39404	89496	1	0	0	0	TRUE
s_53273	POLR3GL	0	56511	0.33166	56511	54325	2946.2	0.39404	89496	1	0	0	0	TRUE
s_38534	ZNF771	0	56511	0.33166	56511	54325	2946.2	0.39404	89496	1	0	0	0	TRUE
s_10426	KRT86	13.93	2472.3	13.93	2472.3	73721	52564000000	765.3	88867	1	0	0	0	TRUE
s_51458	EGFL8	15588	2832.6	15588	2832.6	74163	69124000000	1012.5	88.53	1	0	0	0	TRUE
s_62294	CCDC117	46433	10995	46433	10995	78569	1061200000000	15547	87806	1	0	0	0	TRUE
s_69214	ZC3H12B	0.99499	123.62	0.99499	123.62	5965	12673	19824	87.09	1	0	0	0	TRUE
s_03174	CHKB	47428	11179	47428	11179	78508	1096600000000	16397	86927	1	0	0	0	TRUE
s_36606	ABT1	0.66332	88298	0.66332	88298	57465	6484.9	10196	86787	1	0	0	0	TRUE
s_26024	DAZAP2	0.66332	88298	0.66332	88298	57465	6484.9	10196	86787	1	0	0	0	TRUE
s_34202	ADGRA2	10282	1642.3	10282	1642.3	71865	23002000000	360.46	85962	1	0	0	0	TRUE
s_74875	NUTM2B	33166	420.3	33166	420.3	66088	147500000	23688	85675	1	0	0	0	TRUE
s_05074	DSC3	53398	12616	53398	12616	78576	139700000000	22080	84544	1	0	0	0	TRUE
s_23756	ANGPTL1	56383	769.96	56383	769.96	68597	4987200000	82971	83.91	1	0	0	0	TRUE
s_29073	CHL1	0	52979	0.33166	52979	53411	2583	0.39404	83869	1	0	0	0	TRUE
s_21742	HIST1H4F	0	52979	0.33166	52979	53411	2583	0.39404	83869	1	0	0	0	TRUE
s_24383	WDR46	0	52979	0.33166	52979	53411	2583	0.39404	83869	1	0	0	0	TRUE
s_41534	SLC38A4	0	52979	0.33166	52979	53411	2583	0.39404	83869	1	0	0	0	TRUE
s_55898	ZNF830	0	52979	0.33166	52979	53411	2583	0.39404	83869	1	0	0	0	TRUE
s_65610	CCDC89	0	52979	0.33166	52979	53411	2583	0.39404	83869	1	0	0	0	TRUE
s_54586	PRPF38A	0	52979	0.33166	52979	53411	2583	0.39404	83869	1	0	0	0	TRUE
s_49093	THTPA	0.33166	52979	0.33166	52979	53411	2351.1	0.39404	83869	1	0	0	0	TRUE
s_33605	FTSJ1	0	52979	0.33166	52979	53411	2583	0.39404	83869	1	0	0	0	TRUE
s_13103	ORC4	0	52979	0.33166	52979	53411	2583	0.39404	83869	1	0	0	0	TRUE
s_16612	RPS26	0	52979	0.33166	52979	53411	2583	0.39404	83869	1	0	0	0	TRUE
s_70446	FAM228B	0.66332	84766	0.66332	84766	56883	5954	10196	83289	1	0	0	0	TRUE
s_60564	C9orf41	53066	12242	53066	12242	7823	1313300000000	21737	82.67	1	0	0	0	TRUE
s_24966	ONECUT2	36483	452.09	36483	452.09	66069	1703400000	29535	82515	1	0	0	0	TRUE
s_37205	PLA2G3	39799	498	39799	498	66468	2069100000	36196	82113	1	0	0	0	TRUE
s_34977	SERGEF	39136	8194.1	39136	8194.1	76737	584520000000	10125	81045	1	0	0	0	TRUE
s_60499	LYPD2	34639	1854.3	34639	1854.3	71637	29257000000	521.92	80643	1	0	0	0	TRUE
s_28308	SEMA6C	66332	897.11	66332	897.11	68784	6765900000	122.99	80294	1	0	0	0	TRUE
s_39453	ATP8A2	0.66332	81234	0.66332	81234	56276	5446.3	10196	79792	1	0	0	0	TRUE
s_65397	SLC37A2	0.66332	81234	0.66332	81234	56276	5446.3	10196	79792	1	0	0	0	TRUE
s_02141	CACNA1B	0.66332	81234	0.66332	81234	56276	5446.3	10196	79792	1	0	0	0	TRUE
s_37742	CRYL1	0.99499	113.02	0.99499	113.02	58368	10503	19824	79565	1	0	0	0	TRUE
s_72886	ALG11	0.99499	113.02	0.99499	113.02	58368	10503	19824	79565	1	0	0	0	TRUE
s_42862	SLC39A4	47096	10137	47096	10137	77196	896240000000	16111	79.49	1	0	0	0	TRUE
s_25058	FXR2	16915	2811.4	16915	2811.4	72945	67633000000	1241.1	79325	1	0	0	0	TRUE
s_01582	BAK1	14261	2267.5	14261	2267.5	72157	43837000000	811.42	79101	1	0	0	0	TRUE
s_53327	BTBD10	99499	1451.6	99499	1451.6	70516	17836000000	332.42	79072	1	0	0	0	TRUE
s_21042	RAB7A	10613	1568.2	10613	1568.2	70781	20839000000	389.89	78882	1	0	0	0	TRUE
s_14676	PPP3CC	22885	4054.6	22885	4054.6	74077	141380000000	2640.3	78464	1	0	0	0	TRUE
s_52316	SELO	20895	3613.2	20895	3613.2	73669	112060000000	2103.2	78.33	1	0	0	0	TRUE
s_22147	NDST2	0	49447	0.33166	49447	52435	2243.8	0.39404	78243	1	0	0	0	TRUE
s_11593	MMP3	0	49447	0.33166	49447	52435	2243.8	0.39404	78243	1	0	0	0	TRUE
s_27679	APC2	0	49447	0.33166	49447	52435	2243.8	0.39404	78243	1	0	0	0	TRUE
s_60131	TRAM1L1	0.33166	49447	0.33166	49447	52435	2035.6	0.39404	78243	1	0	0	0	TRUE
s_18608	TAC3	0	49447	0.33166	49447	52435	2243.8	0.39404	78243	1	0	0	0	TRUE
s_66844	FRMD3	0.33166	49447	0.33166	49447	52435	2035.6	0.39404	78243	1	0	0	0	TRUE
s_30917	HSPA4L	0	49447	0.33166	49447	52435	2243.8	0.39404	78243	1	0	0	0	TRUE
s_71172	C1orf53	0	49447	0.33166	49447	52435	2243.8	0.39404	78243	1	0	0	0	TRUE
s_50609	C14orf159	0	49447	0.33166	49447	52435	2243.8	0.39404	78243	1	0	0	0	TRUE
s_37164	KLK14	0	49447	0.33166	49447	52435	2243.8	0.39404	78243	1	0	0	0	TRUE
s_13486	PDCD1	0	49447	0.33166	49447	52435	2243.8	0.39404	78243	1	0	0	0	TRUE
s_31157	DENND3	0	49447	0.33166	49447	52435	2243.8	0.39404	78243	1	0	0	0	TRUE
s_49021	GDPD3	0	49447	0.33166	49447	52435	2243.8	0.39404	78243	1	0	0	0	TRUE
s_30737	COPE	0	49447	0.33166	49447	52435	2243.8	0.39404	78243	1	0	0	0	TRUE
s_05069	DSC2	0	49447	0.33166	49447	52435	2243.8	0.39404	78243	1	0	0	0	TRUE
s_21112	PLA2G7	0	49447	0.33166	49447	52435	2243.8	0.39404	78243	1	0	0	0	TRUE
s_40246	SGTB	21558	3729.7	21558	3729.7	73697	119410000000	2274	77.76	1	0	0	0	TRUE
s_44608	GPR108	36815	7187.5	36815	7187.5	75706	44750000000	8685.2	76728	1	0	0	0	TRUE
s_32996	NUP188	43779	8872.2	43779	8872.2	76305	683720000000	13413	76228	1	0	0	0	TRUE
s_64388	OR56B4	76282	1010.1	76282	1010.1	68727	8563500000	172.97	76225	1	0	0	0	TRUE
s_35455	TRMT2A	36815	7092.1	36815	7092.1	75513	435290000000	8685.2	75705	1	0	0	0	TRUE
s_51856	VMP1	15256	2352.3	15256	2352.3	71775	47061000000	959.7	75438	1	0	0	0	TRUE
s_46437	GRHL3	56383	692.26	56383	692.26	67064	3993300000	82971	75.38	1	0	0	0	TRUE
s_38936	CXXC5	63016	791.15	63016	791.15	67614	5227100000	108.58	75319	1	0	0	0	TRUE
s_22621	EIF3H	25.87	4513.8	25.87	4513.8	73925	175020000000	3588.1	74923	1	0	0	0	TRUE
s_16883	SCN2A	41789	8215.3	41789	8215.3	75851	584940000000	11936	74814	1	0	0	0	TRUE
s_59997	GRK7	44443	8858.1	44443	8858.1	7607	680740000000	13929	74678	1	0	0	0	TRUE
s_72276	C1orf226	39799	452.09	39799	452.09	65075	1689800000	36196	74481	1	0	0	0	TRUE
s_48064	EPS8L2	13266	137.75	13266	137.75	5898	15490	33618	74402	1	0	0	0	TRUE
s_17147	SEMG2	18905	3023.3	18905	3023.3	72474	77978000000	1638	74234	1	0	0	0	TRUE
s_12548	NFKBIA	21.89	3623.8	21.89	3623.8	7307	112340000000	2362.5	74104	1	0	0	0	TRUE
s_11196	MC1R	49086	9945.9	49086	9945.9	76337	859220000000	17874	74026	1	0	0	0	TRUE
s_34307	RNF167	21.89	3606.1	21.89	3606.1	43166	11120000000	2362.5	73.74	1	0	0	0	TRUE
s_75469	CXorf51B	33166	6036.1	33166	6036.1	74651	313980000000	6685.8	73415	1	0	0	0	TRUE
s_08105	HIST1H2AE	0.66332	74.17	0.66332	74.17	5498	4500.1	10196	72796	1	0	0	0	TRUE
s_67991	C20orf203	0.66332	74.17	0.66332	74.17	5498	4500.1	10196	72796	1	0	0	0	TRUE
s_76045	NT5C1B-RDH14	0	45915	0.33166	45915	51387	1928.8	0.39404	72616	1	0	0	0	TRUE
s_39746	YBEY	0	45915	0.33166	45915	51387	1928.8	0.39404	72616	1	0	0	0	TRUE
s_67822	ZNF763	0	45915	0.33166	45915	51387	1928.8	0.39404	72616	1	0	0	0	TRUE
s_54350	ZBTB45	0.33166	45915	0.33166	45915	51387	1743.3	0.39404	72616	1	0	0	0	TRUE
s_31017	ICK	0.33166	45915	0.33166	45915	51387	1743.3	0.39404	72616	1	0	0	0	TRUE
s_57117	EFHC1	0	45915	0.33166	45915	51387	1928.8	0.39404	72616	1	0	0	0	TRUE
s_13128	OSBP	0.33166	45915	0.33166	45915	51387	1743.3	0.39404	72616	1	0	0	0	TRUE
s_07676	GPX4	0	45915	0.33166	45915	51387	1928.8	0.39404	72616	1	0	0	0	TRUE
s_51170	PABPC1L	0	45915	0.33166	45915	51387	1928.8	0.39404	72616	1	0	0	0	TRUE
s_22036	IRS4	0	45915	0.33166	45915	51387	1928.8	0.39404	72616	1	0	0	0	TRUE
s_54414	PLXDC2	0	45915	0.33166	45915	51387	1928.8	0.39404	72616	1	0	0	0	TRUE
s_49030	TNIP2	0	45915	0.33166	45915	51387	1928.8	0.39404	72616	1	0	0	0	TRUE
s_67070	MDGA1	0	45915	0.33166	45915	51387	1928.8	0.39404	72616	1	0	0	0	TRUE
s_57536	ALPK2	0	45915	0.33166	45915	51387	1928.8	0.39404	72616	1	0	0	0	TRUE
s_31874	NACAD	0	45915	0.33166	45915	51387	1928.8	0.39404	72616	1	0	0	0	TRUE
s_69282	C11orf53	0.33166	45915	0.33166	45915	51387	1743.3	0.39404	72616	1	0	0	0	TRUE
s_31038	R3HDM2	0	45915	0.33166	45915	51387	1928.8	0.39404	72616	1	0	0	0	TRUE
s_22576	DDX3Y	13266	134.21	13266	134.21	58608	14667	33618	72476	1	0	0	0	TRUE
s_30284	WDR45	11608	1603.5	11608	1603.5	69916	21665000000	486.72	72156	1	0	0	0	TRUE
s_29330	HPSE	16583	166	16583	166	59732	22439	52248	71898	1	0	0	0	TRUE
s_07704	RAPGEF1	49418	9698.7	49418	9698.7	75879	815180000000	18179	71567	1	0	0	0	TRUE
s_63637	ZNF781	26533	271.96	26533	271.96	62233	60479	14278	71.27	1	0	0	0	TRUE
s_13192	P2RX7	13266	130.68	13266	130.68	58227	13867	33618	70549	1	0	0	0	TRUE
s_44028	PCDHA7	15.92	2316.9	15.92	2316.9	7098	45442000000	1067	70443	1	0	0	0	TRUE
s_28544	CCT7	16583	162.47	16583	162.47	59424	21447	52248	70353	1	0	0	0	TRUE
s_22716	S1PR4	16583	162.47	16583	162.47	59424	21447	52248	70353	1	0	0	0	TRUE
s_41263	2002-03-01	79599	17211	79599	17211	77384	2584700000000	60174	69838	1	0	0	0	TRUE
s_04182	CTBP2	14593	2055.6	14593	2055.6	70432	35668000000	859.18	69.63	1	0	0	0	TRUE
s_42029	SMU1	36161	194.26	36161	194.26	60291	30672	76302	69604	1	0	0	0	TRUE
s_59968	LRRC15	0.99499	98894	0.99499	98894	56459	7933.7	19824	69531	1	0	0	0	TRUE
s_60511	SGCZ	37.81	6731.8	37.81	6731.8	74387	389910000000	9285.9	69467	1	0	0	0	TRUE
s_01791	BMP6	0.66332	70638	0.66332	70638	54286	4061.7	10196	69298	1	0	0	0	TRUE
s_26224	PSMD6	0.66332	70638	0.66332	70638	54286	4061.7	10196	69298	1	0	0	0	TRUE
s_09150	IDH3B	0.66332	70638	0.66332	70638	54286	4061.7	10196	69298	1	0	0	0	TRUE
s_37806	ZC2HC1A	12935	1758.9	12935	1758.9	69807	26035000000	636.58	69.2	1	0	0	0	TRUE
s_03926	CRX	21226	3256.4	21226	3256.4	71953	90167000000	2187.6	69.17	1	0	0	0	TRUE
s_54089	BEX2	17.91	2617.2	17.91	2617.2	71133	58003000000	1431.2	68706	1	0	0	0	TRUE
s_33563	BRD1	67991	13859	67991	13859	76503	1669100000000	40501	68529	1	0	0	0	TRUE
s_01107	RHOA	23216	3531.9	23216	3531.9	71887	1.06e+07	2737	67067	1	0	0	0	TRUE
s_45196	CAMK1G	0	42383	0.33166	42383	50258	1637.8	0.39404	66.99	1	0	0	0	TRUE
s_24564	CER1	0.33166	42383	0.33166	42383	50258	1474.1	0.39404	66.99	1	0	0	0	TRUE
s_29302	TUBGCP2	0	42383	0.33166	42383	50258	1637.8	0.39404	66.99	1	0	0	0	TRUE
s_56530	MAPK1IP1L	0	42383	0.33166	42383	50258	1637.8	0.39404	66.99	1	0	0	0	TRUE
s_01563	BAD	0	42383	0.33166	42383	50258	1637.8	0.39404	66.99	1	0	0	0	TRUE
s_04384	CYP2D6	0	42383	0.33166	42383	50258	1637.8	0.39404	66.99	1	0	0	0	TRUE
s_22320	PRPF18	0	42383	0.33166	42383	50258	1637.8	0.39404	66.99	1	0	0	0	TRUE
s_69923	ACSM2B	0	42383	0.33166	42383	50258	1637.8	0.39404	66.99	1	0	0	0	TRUE
s_50920	ARMC9	0	42383	0.33166	42383	50258	1637.8	0.39404	66.99	1	0	0	0	TRUE
s_35734	GLS2	0	42383	0.33166	42383	50258	1637.8	0.39404	66.99	1	0	0	0	TRUE
s_00967	AQP8	20231	2959.8	20231	2959.8	71236	74193000000	1940.3	66733	1	0	0	0	TRUE
s_25940	TM9SF4	13266	123.62	13266	123.62	57431	12336	33618	66697	1	0	0	0	TRUE
s_72190	C14orf180	12935	1688.3	12935	1688.3	69216	23899000000	636.58	66.4	1	0	0	0	TRUE
s_17779	SMARCE1	34161	5644	34161	5644	73268	27250000000	7200	66113	1	0	0	0	TRUE
s_33084	TNPO3	0.66332	67107	0.66332	67107	53557	3646.2	10196	65.8	1	0	0	0	TRUE
s_68465	FAM133A	42784	7417	42784	7417	74045	472370000000	12661	65535	1	0	0	0	TRUE
s_44727	PARP6	50413	9038.2	50413	9038.2	74579	703240000000	19111	65014	1	0	0	0	TRUE
s_41288	LAMTOR1	36483	356.72	36483	356.72	6266	1036400000	29535	64968	1	0	0	0	TRUE
s_30703	CYP4F8	22221	3238.8	22221	3238.8	71243	88817000000	2453	64944	1	0	0	0	TRUE
s_30945	ZFP30	0.99499	91.83	0.99499	91.83	55401	6787	19824	64514	1	0	0	0	TRUE
s_51400	DUSP16	37478	6180.9	37478	6180.9	73279	326760000000	9083	64461	1	0	0	0	TRUE
s_40619	ZNF586	26533	243.7	26533	243.7	60657	48014	14278	63793	1	0	0	0	TRUE
s_70696	KRTAP12-3	35488	5711.1	35488	5711.1	72905	278440000000	7921.6	63769	1	0	0	0	TRUE
s_55758	IGFN1	25.87	3825.1	25.87	3825.1	71537	124040000000	3588.1	63425	1	0	0	0	TRUE
s_17014	CCL19	20895	2928	20895	2928	70637	72346000000	2103.2	63389	1	0	0	0	TRUE
s_71390	LIN28B	34825	5520.4	34825	5520.4	72679	259840000000	7555.6	63108	1	0	0	0	TRUE
s_45928	ARHGAP21	89549	1017.2	89549	1017.2	66764	8563800000	256.39	62967	1	0	0	0	TRUE
s_62268	CCT8L2	0.66332	63575	0.66332	63575	52788	3253.8	10196	62303	1	0	0	0	TRUE
s_55191	AQP10	82916	914.77	82916	914.77	66229	6906200000	212.2	62228	1	0	0	0	TRUE
s_09748	ITGA2	10282	1190.3	10282	1190.3	67224	11748000000	360.46	62151	1	0	0	0	TRUE
s_04953	DNTT	16915	2203.9	16915	2203.9	69434	40728000000	1241.1	62.08	1	0	0	0	TRUE
s_48844	FTO	13598	1663.5	13598	1663.5	68332	2307000000	720.8	61456	1	0	0	0	TRUE
s_73182	TSPAN11	0	38851	0.33166	38851	49033	1370.9	0.39404	61363	1	0	0	0	TRUE
s_16512	RPS6	0	38851	0.33166	38851	49033	1370.9	0.39404	61363	1	0	0	0	TRUE
s_51709	CSRNP2	0	38851	0.33166	38851	49033	1370.9	0.39404	61363	1	0	0	0	TRUE
s_46438	GRHL3	0	38851	0.33166	38851	49033	1370.9	0.39404	61363	1	0	0	0	TRUE
s_71003	TMIGD1	0	38851	0.33166	38851	49033	1370.9	0.39404	61363	1	0	0	0	TRUE
s_61727	DHRS13	0	38851	0.33166	38851	49033	1370.9	0.39404	61363	1	0	0	0	TRUE
s_69365	GOLGA6A	0	38851	0.33166	38851	49033	1370.9	0.39404	61363	1	0	0	0	TRUE
s_65307	SMTNL1	72966	766.43	72966	766.43	65314	4824100000	155.16	60943	1	0	0	0	TRUE
s_28006	YAP1	13266	113.02	13266	113.02	56149	10211	33618	60918	1	0	0	0	TRUE
s_62122	ZNF362	28523	4135.9	28523	4135.9	71306	144780000000	4581.8	60.68	1	0	0	0	TRUE
s_74495	RGPD8	36161	169.53	36161	169.53	58338	23022	76302	60654	1	0	0	0	TRUE
s_33096	SLC16A8	27.86	4008.7	27.86	4008.7	71183	135930000000	4319.6	60.57	1	0	0	0	TRUE
s_69504	PRAMEF10	33166	296.68	33166	296.68	61077	71000	23688	60276	1	0	0	0	TRUE
s_41525	CXorf57	26533	229.58	26533	229.58	59799	42333	14278	60054	1	0	0	0	TRUE
s_69260	HMX3	2985	261.36	2985	261.36	60409	54959	18616	59884	1	0	0	0	TRUE
s_71094	FAM132A	56383	550.98	56383	550.98	63777	2474200000	82971	59.87	1	0	0	0	TRUE
s_34928	SACS	39799	363.79	39799	363.79	61948	1070400000	36196	59805	1	0	0	0	TRUE
s_13331	PAX3	36483	328.47	36483	328.47	61473	87110	29535	59769	1	0	0	0	TRUE
s_73415	RBMXL1	55719	9349	55719	9349	7365	748640000000	24570	59288	1	0	0	0	TRUE
s_50727	MAP3K19	86232	16091	86232	16091	75273	2235900000000	73576	59006	1	0	0	0	TRUE
s_17768	SMARCD1	114.09	22788	114.09	22788	76294	4506200000000	1486700000	58805	1	0	0	0	TRUE
s_31869	SSPO	75619	13513	75619	13513	74626	1571700000000	52900	58424	1	0	0	0	TRUE
s_23307	TAX1BP1	59699	575.7	59699	575.7	63705	2697800000	95253	58376	1	0	0	0	TRUE
s_37280	CUZD1	36161	162.47	36161	162.47	57727	21042	76302	58096	1	0	0	0	TRUE
s_20299	WNT11	12935	1472.8	12935	1472.8	67247	17963000000	636.58	57861	1	0	0	0	TRUE
s_02404	RUNX1	43362	2504.1	43362	2504.1	69053	52419000000	1861.8	57574	1	0	0	0	TRUE
s_75348	DPP9-AS1	39799	349.66	39799	349.66	61378	98470	36196	57457	1	0	0	0	TRUE
s_68596	HIST2H3A	99499	1056	99499	1056	6593	9170800000	332.42	57376	1	0	0	0	TRUE
s_64941	TIGD4	13598	1550.5	13598	1550.5	67317	19911000000	720.8	57246	1	0	0	0	TRUE
s_41894	RPRD1A	16583	1981.4	16583	1981.4	68169	32662000000	1181.3	57167	1	0	0	0	TRUE
s_09846	ITIH4	64011	10726	64011	10726	73664	985420000000	34808	57.15	1	0	0	0	TRUE
s_02448	CBR3	13266	1501.1	13266	1501.1	67182	18647000000	677.9	57143	1	0	0	0	TRUE
s_11294	MDM4	13266	105.96	13266	105.96	55226	8908.6	33618	57065	1	0	0	0	TRUE
s_21084	DDX39B	36161	158.94	36161	158.94	57412	20087	76302	56818	1	0	0	0	TRUE
s_27114	BCAP31	36161	158.94	36161	158.94	57412	20087	76302	56818	1	0	0	0	TRUE
s_52725	IFI27L2	21226	2648.9	21226	2648.9	68975	58615000000	2187.6	56182	1	0	0	0	TRUE
s_66128	DEFB107A	25.87	3369.5	25.87	3369.5	69708	95207000000	3588.1	55819	1	0	0	0	TRUE
s_66715	OR4C3	0	35319	0.33166	35319	47694	1127.9	0.39404	55737	1	0	0	0	TRUE
s_68643	KRTAP6-3	0	35319	0.33166	35319	47694	1127.9	0.39404	55737	1	0	0	0	TRUE
s_03219	CHRNA1	0.33166	35319	0.33166	35319	47694	1004.9	0.39404	55737	1	0	0	0	TRUE
s_67484	FAM98B	0.33166	35319	0.33166	35319	47694	1004.9	0.39404	55737	1	0	0	0	TRUE
s_16544	RPS9	0	35319	0.33166	35319	47694	1127.9	0.39404	55737	1	0	0	0	TRUE
s_36880	SERTAD1	0	35319	0.33166	35319	47694	1127.9	0.39404	55737	1	0	0	0	TRUE
s_35078	CNNM3	0	35319	0.33166	35319	47694	1127.9	0.39404	55737	1	0	0	0	TRUE
s_02134	CA12	0.33166	35319	0.33166	35319	47694	1004.9	0.39404	55737	1	0	0	0	TRUE
s_13122	ORM2	0	35319	0.33166	35319	47694	1127.9	0.39404	55737	1	0	0	0	TRUE
s_10930	CAPRIN1	0	35319	0.33166	35319	47694	1127.9	0.39404	55737	1	0	0	0	TRUE
s_41290	LAMTOR1	0	35319	0.33166	35319	47694	1127.9	0.39404	55737	1	0	0	0	TRUE
s_47049	BCAN	0	35319	0.33166	35319	47694	1127.9	0.39404	55737	1	0	0	0	TRUE
s_35077	CNNM3	0.66332	56511	0.66332	56511	51117	2537.5	10196	55307	1	0	0	0	TRUE
s_25254	GDF3	0.66332	56511	0.66332	56511	51117	2537.5	10196	55307	1	0	0	0	TRUE
s_40412	RRN3	0.66332	56511	0.66332	56511	51117	2537.5	10196	55307	1	0	0	0	TRUE
s_42347	BLOC1S4	0.66332	56511	0.66332	56511	51117	2537.5	10196	55307	1	0	0	0	TRUE
s_60711	MAGEB10	17.91	2108.6	17.91	2108.6	68017	36938000000	1431.2	55262	1	0	0	0	TRUE
s_21026	SEMA3B	79599	773.49	79599	773.49	64336	4875400000	191.98	55251	1	0	0	0	TRUE
s_40169	CCHCR1	33166	271.96	33166	271.96	59826	59089	23688	55196	1	0	0	0	TRUE
s_15532	PTS	33166	271.96	33166	271.96	59826	59089	23688	55196	1	0	0	0	TRUE
s_53259	PSMG3	13266	102.43	13266	102.43	54742	8291.7	33618	55139	1	0	0	0	TRUE
s_10976	SMAD6	13266	102.43	13266	102.43	54742	8291.7	33618	55139	1	0	0	0	TRUE
s_28356	ZNF211	16583	127.15	16583	127.15	55912	12784	52248	54901	1	0	0	0	TRUE
s_52409	NRIP2	23216	180.13	23216	180.13	5769	25729	10632	54532	1	0	0	0	TRUE
s_60975	SMCR8	27528	3556.6	27528	3556.6	69624	106010000000	4192	54508	1	0	0	0	TRUE
s_63776	TTLL9	26533	3390.6	26533	3390.6	69447	96246000000	3822.9	54.41	1	0	0	0	TRUE
s_43127	LMBR1L	28855	3729.7	28855	3729.7	69654	116580000000	4716.4	53889	1	0	0	0	TRUE
s_64054	SNX31	28855	3708.5	28855	3708.5	69571	11520000000	4716.4	53.58	1	0	0	0	TRUE
s_27795	MRVI1	72966	674.6	72966	674.6	63475	3688800000	155.16	53571	1	0	0	0	TRUE
s_47148	CIDEC	26533	204.85	26533	204.85	58163	33273	14278	53511	1	0	0	0	TRUE
s_41736	DALRD3	13266	98894	13266	98894	54241	7697.5	33618	53213	1	0	0	0	TRUE
s_45506	GATAD2B	33498	4429	33498	4429	70047	164730000000	6854.7	53091	1	0	0	0	TRUE
s_32455	MAN2B2	33166	261.36	33166	261.36	59255	54327	23688	53019	1	0	0	0	TRUE
s_13699	PEX14	56714	8529.6	56714	8529.6	72076	617730000000	25686	52867	1	0	0	0	TRUE
s_47693	ZMAT3	42784	5976	42784	5976	70929	301340000000	12661	52729	1	0	0	0	TRUE
s_21193	MLLT10	23216	173.06	23216	173.06	57116	23639	10632	52365	1	0	0	0	TRUE
s_47045	SRR	10945	1084.3	10945	1084.3	65056	9602300000	420.72	52329	1	0	0	0	TRUE
s_00579	ALAD	13.93	1455.2	13.93	1455.2	66078	17389000000	765.3	52097	1	0	0	0	TRUE
s_00624	ALDH3B1	0.99499	74.17	0.99499	74.17	52357	4320.6	19824	51972	1	0	0	0	TRUE
s_09783	ITGAL	0.99499	74.17	0.99499	74.17	52357	4320.6	19824	51972	1	0	0	0	TRUE
s_38504	WAC	16583	120.09	16583	120.09	55094	11325	52248	51811	1	0	0	0	TRUE
s_63354	GRASP	16583	120.09	16583	120.09	55094	11325	52248	51811	1	0	0	0	TRUE
s_24096	MAP3K13	0.66332	52979	0.66332	52979	50203	2213.5	10196	51809	1	0	0	0	TRUE
s_55521	DUOXA1	0.66332	52979	0.66332	52979	50203	2213.5	10196	51809	1	0	0	0	TRUE
s_14329	POLA1	0.66332	52979	0.66332	52979	50203	2213.5	10196	51809	1	0	0	0	TRUE
s_18881	TCN1	36161	144.81	36161	144.81	56078	16492	76302	51703	1	0	0	0	TRUE
s_31773	NFASC	37146	4817.5	37146	4817.5	69809	194570000000	8882.7	50721	1	0	0	0	TRUE
s_66992	TAS2R43	23548	2694.9	23548	2694.9	6779	60182000000	2835.8	50163	1	0	0	0	TRUE
s_01109	RHOB	0	31787	0.33166	31787	46218	908.95	0.39404	50.11	1	0	0	0	TRUE
s_08285	NCKAP1L	0	31787	0.33166	31787	46218	908.95	0.39404	50.11	1	0	0	0	TRUE
s_19293	NR2E1	0	31787	0.33166	31787	46218	908.95	0.39404	50.11	1	0	0	0	TRUE
s_01462	ATP6V0C	0	31787	0.33166	31787	46218	908.95	0.39404	50.11	1	0	0	0	TRUE
s_30206	CLASRP	0.33166	31787	0.33166	31787	46218	804.71	0.39404	50.11	1	0	0	0	TRUE
s_25232	BCAR1	0	31787	0.33166	31787	46218	908.95	0.39404	50.11	1	0	0	0	TRUE
s_32903	QPRT	0	31787	0.33166	31787	46218	908.95	0.39404	50.11	1	0	0	0	TRUE
s_04068	CSNK1A1	43116	335.53	43116	335.53	59855	89461	43709	50099	1	0	0	0	TRUE
s_03659	COL17A1	16583	1727.1	16583	1727.1	66189	24491000000	1181.3	49768	1	0	0	0	TRUE
s_11465	MGST2	0.99499	70638	0.99499	70638	51663	3895.6	19824	49463	1	0	0	0	TRUE
s_67241	C11orf44	0.99499	70638	0.99499	70638	51663	3895.6	19824	49463	1	0	0	0	TRUE
s_51965	KRTAP1-3	34639	1140.8	34639	1140.8	64634	1059000000	521.92	49413	1	0	0	0	TRUE
s_57708	TLCD1	13266	91.83	13266	91.83	53183	6577.2	33618	49.36	1	0	0	0	TRUE
s_52230	GPR101	86232	762.9	86232	762.9	63107	4696300000	233.66	49344	1	0	0	0	TRUE
s_59768	FAM168B	2985	215.45	2985	215.45	57633	36524	18616	49243	1	0	0	0	TRUE
s_24995	PSMF1	2985	215.45	2985	215.45	57633	36524	18616	49243	1	0	0	0	TRUE
s_11958	MX2	36161	137.75	36161	137.75	55362	14831	76302	49146	1	0	0	0	TRUE
s_26845	AP1M2	14925	1490.5	14925	1490.5	65493	18162000000	908.6	48952	1	0	0	0	TRUE
s_75024	SHISA9	26533	187.19	26533	187.19	56869	27486	14278	48837	1	0	0	0	TRUE
s_15174	PSMB2	33166	240.17	33166	240.17	5804	45420	23688	48665	1	0	0	0	TRUE
s_57892	THEM4	33166	240.17	33166	240.17	5804	45420	23688	48665	1	0	0	0	TRUE
s_16998	CCL15	2985	211.92	2985	211.92	57396	35266	18616	48424	1	0	0	0	TRUE
s_58058	BTBD16	0.66332	49447	0.66332	49447	49226	1912.3	10196	48312	1	0	0	0	TRUE
s_65934	CCZ1B	38805	4814	38805	4814	69185	193510000000	9911	47966	1	0	0	0	TRUE
s_60276	UBLCP1	25538	2850.3	25538	2850.3	67474	67165000000	3474.1	47924	1	0	0	0	TRUE
s_75330	SMIM6	26533	183.66	26533	183.66	56595	26397	14278	47903	1	0	0	0	TRUE
s_64888	SPNS3	26533	183.66	26533	183.66	56595	26397	14278	47903	1	0	0	0	TRUE
s_08992	DNAJC4	36161	134.21	36161	134.21	5499	14035	76302	47867	1	0	0	0	TRUE
s_75921	SLFN12L	18241	1868.4	18241	1868.4	66022	28615000000	1498.3	47798	1	0	0	0	TRUE
s_25251	NR1D1	99499	875.92	99499	875.92	63235	6188400000	332.42	47496	1	0	0	0	TRUE
s_49585	NLRX1	13266	88298	13266	88298	52623	6051	33618	47434	1	0	0	0	TRUE
s_71607	OR52E4	13266	88298	13266	88298	52623	6051	33618	47434	1	0	0	0	TRUE
s_01140	ARHGAP6	17246	1723.6	17246	1723.6	65625	24291000000	1302.6	47277	1	0	0	0	TRUE
s_52822	TMEM222	16583	109.49	16583	109.49	53773	9307	52248	47175	1	0	0	0	TRUE
s_71855	KRT39	16583	109.49	16583	109.49	53773	9307	52248	47175	1	0	0	0	TRUE
s_16549	RPS11	16583	109.49	16583	109.49	53773	9307	52248	47175	1	0	0	0	TRUE
s_46755	UBL5	0.99499	67107	0.99499	67107	50933	3493.3	19824	46955	1	0	0	0	TRUE
s_36158	PPP2R3B	43116	314.34	43116	314.34	58916	77916	43709	46894	1	0	0	0	TRUE
s_49089	ZNF576	74292	10582	74292	10582	7135	946440000000	50600	46711	1	0	0	0	TRUE
s_31172	RUFY3	32171	3690.9	32171	3690.9	67983	112920000000	6194.4	46486	1	0	0	0	TRUE
s_25405	SNCAIP	82916	685.19	82916	685.19	62066	3759900000	212.2	46468	1	0	0	0	TRUE
s_12681	NNMT	39799	282.55	39799	282.55	58313	62742	36196	46303	1	0	0	0	TRUE
s_02782	CDK11B	26533	176.6	26533	176.6	56033	24286	14278	46033	1	0	0	0	TRUE
s_34061	DPCD	41126	4969.4	41126	4969.4	68825	205720000000	11466	46025	1	0	0	0	TRUE
s_32757	KCNH3	40131	4803.4	40131	4803.4	6868	192030000000	10783	45871	1	0	0	0	TRUE
s_41016	UBE2R2	23216	151.87	23216	151.87	55243	17914	10632	45866	1	0	0	0	TRUE
s_36671	ICOS	12272	1091.4	12272	1091.4	6363	9619200000	558.61	45657	1	0	0	0	TRUE
s_63398	SYNE3	20231	2006.1	20231	2006.1	65628	32884000000	1940.3	45084	1	0	0	0	TRUE
s_34973	MYCBP	35.82	4075.8	35.82	4075.8	67908	137610000000	8108.6	44865	1	0	0	0	TRUE
s_22104	RANBP3	0.66332	45915	0.66332	45915	48179	1633.7	10196	44814	1	0	0	0	TRUE
s_62234	COMMD7	0.66332	45915	0.66332	45915	48179	1633.7	10196	44814	1	0	0	0	TRUE
s_08100	HIST1H1B	23216	148.34	23216	148.34	54906	17039	10632	44783	1	0	0	0	TRUE
s_34345	L3MBTL1	36483	4157.1	36483	4157.1	67935	143170000000	8490.3	44.72	1	0	0	0	TRUE
s_08540	HMX2	39136	4531.5	39136	4531.5	68192	170370000000	10125	44646	1	0	0	0	TRUE
s_47603	RHBDF1	31.84	3493.1	31.84	3493.1	67333	100710000000	6035.6	44552	1	0	0	0	TRUE
s_49641	GAL3ST4	0.33166	28255	0.33166	28255	44574	627.27	0.39404	44484	1	0	0	0	TRUE
s_55910	CHURC1	0	28255	0.33166	28255	44574	713.88	0.39404	44484	1	0	0	0	TRUE
s_07556	GPR20	0	28255	0.33166	28255	44574	713.88	0.39404	44484	1	0	0	0	TRUE
s_18775	TBX6	0	28255	0.33166	28255	44574	713.88	0.39404	44484	1	0	0	0	TRUE
s_69364	GLDN	0	28255	0.33166	28255	44574	713.88	0.39404	44484	1	0	0	0	TRUE
s_21861	ULK1	0.33166	28255	0.33166	28255	44574	627.27	0.39404	44484	1	0	0	0	TRUE
s_06850	GALNT2	0	28255	0.33166	28255	44574	713.88	0.39404	44484	1	0	0	0	TRUE
s_13856	PHF1	0.99499	63575	0.99499	63575	50165	3113.4	19824	44446	1	0	0	0	TRUE
s_73272	FAM47C	0.99499	63575	0.99499	63575	50165	3113.4	19824	44446	1	0	0	0	TRUE
s_52726	IFI27L2	23548	2377	23548	2377	6598	46251000000	2835.8	44194	1	0	0	0	TRUE
s_54735	TMEM241	12935	1126.7	12935	1126.7	63385	10229000000	636.58	44143	1	0	0	0	TRUE
s_61771	CCBE1	25206	2581.8	25206	2581.8	66229	54648000000	3362.3	44091	1	0	0	0	TRUE
s_18138	SPTAN1	82916	649.87	82916	649.87	61303	336200000	212.2	44044	1	0	0	0	TRUE
s_59579	ZNF831	36483	240.17	36483	240.17	56972	44899	29535	43521	1	0	0	0	TRUE
s_39291	SUFU	17.91	1652.9	17.91	1652.9	64506	22158000000	1431.2	43219	1	0	0	0	TRUE
s_01325	ATOX1	15.92	1416.3	15.92	1416.3	63883	16203000000	1067	42871	1	0	0	0	TRUE
s_29597	EHD1	72966	540.38	72966	540.38	6028	2308900000	155.16	42797	1	0	0	0	TRUE
s_54662	MFSD5	66332	480.34	66332	480.34	59786	1819200000	122.99	42714	1	0	0	0	TRUE
s_33882	ASF1A	13266	1119.6	13266	1119.6	62955	10066000000	677.9	42492	1	0	0	0	TRUE
s_30928	SCAF8	26533	162.47	26533	162.47	54837	20336	14278	42294	1	0	0	0	TRUE
s_59761	ICA1L	11277	911.24	11277	911.24	62154	6634900000	452.99	42284	1	0	0	0	TRUE
s_08552	FOXA3	17578	1578.8	17578	1578.8	15128	20155000000	1366	42.24	1	0	0	0	TRUE
s_72828	MXRA7	0.99499	60043	0.99499	60043	49354	2756.2	19824	41938	1	0	0	0	TRUE
s_77325	Non-TargetingControl	0.99499	60043	0.99499	60043	49354	2756.2	19824	41938	1	0	0	0	TRUE
s_28370	KAT5	0.99499	60043	0.99499	60043	49354	2756.2	19824	41938	1	0	0	0	TRUE
s_28734	POSTN	0.99499	60043	0.99499	60043	49354	2756.2	19824	41938	1	0	0	0	TRUE
s_47266	MYO1G	0.99499	60043	0.99499	60043	49354	2756.2	19824	41938	1	0	0	0	TRUE
s_28348	CIB2	0.99499	60043	0.99499	60043	49354	2756.2	19824	41938	1	0	0	0	TRUE
s_57188	MBD6	15.92	1377.5	15.92	1377.5	63482	1528000000	1067	41681	1	0	0	0	TRUE
s_34859	BLOC1S6	27196	2684.3	27196	2684.3	65734	58851000000	4066.7	41666	1	0	0	0	TRUE
s_12353	NDUFC1	13266	77702	13266	77702	50801	4607.8	33618	41655	1	0	0	0	TRUE
s_29945	UPK1A	33166	3433	33166	3433	66512	9673000000	6685.8	41.58	1	0	0	0	TRUE
s_34947	CLDN17	23216	137.75	23216	137.75	53844	14549	10632	41533	1	0	0	0	TRUE
s_39572	PANK1	48754	5552.2	48754	5552.2	68023	255380000000	17572	41516	1	0	0	0	TRUE
s_41362	HEATR3	36161	116.55	36161	116.55	5297	10392	76302	41474	1	0	0	0	TRUE
s_41197	C20orf27	0.66332	42383	0.66332	42383	4705	1377.7	10196	41316	1	0	0	0	TRUE
s_03486	CNGB1	0.66332	42383	0.66332	42383	4705	1377.7	10196	41316	1	0	0	0	TRUE
s_07551	GPR19	13266	1073.7	13266	1073.7	62352	9214500000	677.9	40729	1	0	0	0	TRUE
s_43213	EDEM2	64674	7745.5	64674	7745.5	68821	499380000000	35721	40639	1	0	0	0	TRUE
s_69118	TREML1	43362	1769.5	43362	1769.5	64045	25293000000	1861.8	40548	1	0	0	0	TRUE
s_18204	SRP14	23216	134.21	23216	134.21	53472	13764	10632	40.45	1	0	0	0	TRUE
s_28036	CDIPT	23216	134.21	23216	134.21	53472	13764	10632	40.45	1	0	0	0	TRUE
s_73775	C15orf62	36161	113.02	36161	113.02	5253	9730.7	76302	40196	1	0	0	0	TRUE
s_75686	WI2-2373I1.2	33166	197.79	33166	197.79	55252	30055	23688	39957	1	0	0	0	TRUE
s_27271	RBM6	21558	1924.9	21558	1924.9	64157	29945000000	2274	39913	1	0	0	0	TRUE
s_71696	OR4D10	24543	2253.4	24543	2253.4	64636	41161000000	3145.2	39742	1	0	0	0	TRUE
s_05607	ENSA	13266	74.17	13266	74.17	50138	4171.7	33618	39729	1	0	0	0	TRUE
s_27729	B3GALT5	13266	74.17	13266	74.17	50138	4171.7	33618	39729	1	0	0	0	TRUE
s_64082	TMEM252	13266	74.17	13266	74.17	50138	4171.7	33618	39729	1	0	0	0	TRUE
s_31579	SMG1	13266	74.17	13266	74.17	50138	4171.7	33618	39729	1	0	0	0	TRUE
s_47260	ANO3	18905	1621.2	18905	1621.2	63487	21146000000	1638	39589	1	0	0	0	TRUE
s_28967	AP4B1	16583	91.83	16583	91.83	5126	6395.2	52248	39449	1	0	0	0	TRUE
s_67606	KANSL1	16583	91.83	16583	91.83	5126	6395.2	52248	39449	1	0	0	0	TRUE
s_02704	CD40LG	0.99499	56511	0.99499	56511	48494	2421.3	19824	39429	1	0	0	0	TRUE
s_08263	HDAC1	0.99499	56511	0.99499	56511	48494	2421.3	19824	39429	1	0	0	0	TRUE
s_19662	TSSC1	25538	2345.2	25538	2345.2	64661	44586000000	3474.1	39355	1	0	0	0	TRUE
s_13820	PGM1	13.93	1102	13.93	1102	6207	968100000	765.3	39.33	1	0	0	0	TRUE
s_05640	DMTN	10282	755.83	10282	755.83	60679	4514600000	360.46	39269	1	0	0	0	TRUE
s_66244	IL27	96182	695.79	96182	695.79	60361	3818300000	305.74	39242	1	0	0	0	TRUE
s_31722	IQSEC2	82916	579.24	82916	579.24	59646	2634700000	212.2	39194	1	0	0	0	TRUE
s_38989	SCLY	36161	109.49	36161	109.49	52076	9092	76302	38917	1	0	0	0	TRUE
s_51515	OR4F17	36161	109.49	36161	109.49	52076	9092	76302	38917	1	0	0	0	TRUE
s_17685	SLC25A1	10282	748.77	10282	748.77	60544	4425700000	360.46	38897	1	0	0	0	TRUE
s_67739	ZSCAN1	25.87	2355.8	25.87	2355.8	64547	4495000000	3588.1	38896	1	0	0	0	TRUE
s_27289	ALYREF	0	24723	0.33166	24723	42718	542.64	0.39404	38857	1	0	0	0	TRUE
s_73828	GOLGA8N	0.33166	24723	0.33166	24723	42718	472.48	0.39404	38857	1	0	0	0	TRUE
s_40917	NCAPG2	0	24723	0.33166	24723	42718	542.64	0.39404	38857	1	0	0	0	TRUE
s_00893	APBB2	0	24723	0.33166	24723	42718	542.64	0.39404	38857	1	0	0	0	TRUE
s_31133	ZBTB1	0.33166	24723	0.33166	24723	42718	472.48	0.39404	38857	1	0	0	0	TRUE
s_54572	LTV1	0	24723	0.33166	24723	42718	542.64	0.39404	38857	1	0	0	0	TRUE
s_18322	ST5	0	24723	0.33166	24723	42718	542.64	0.39404	38857	1	0	0	0	TRUE
s_06896	GAS2	36151	3574.3	36151	3574.3	65885	104370000000	8298.1	38841	1	0	0	0	TRUE
s_22285	BLZF1	12603	957.15	12603	957.15	61382	7268900000	596.83	38663	1	0	0	0	TRUE
s_64222	ADAMTS18	23548	2076.8	23548	2076.8	64033	34812000000	2835.8	38556	1	0	0	0	TRUE
s_17209	SRSF6	26533	148.34	26533	148.34	53533	16746	14278	38555	1	0	0	0	TRUE
s_16707	RYR3	16915	1370.4	16915	1370.4	62583	15014000000	1241.1	38.42	1	4.4466e-323	8.8932e-323	9.822e-321	TRUE
s_76620	Non-TargetingControl	65338	7417	65338	7417	68051	455630000000	36648	38403	1	9.3872e-323	1.8774e-322	2.0711e-320	TRUE
s_71252	SP5	23216	127.15	23216	127.15	52698	12262	10632	38284	1	7.5641e-321	1.5128e-320	1.6665e-318	TRUE
s_28403	SSSCA1	43362	1670.6	43362	1670.6	63216	22404000000	1861.8	38256	1	2.4436e-320	4.8873e-320	5.3761e-318	TRUE
s_01480	ATP6V1G2	16915	1363.3	16915	1363.3	62509	14851000000	1241.1	38219	1	9.911e-320	1.9822e-319	2.1773e-317	TRUE
s_76922	Non-TargetingControl	49749	5223.7	49749	5223.7	66858	224290000000	18486	38054	1	5.8192e-317	1.1638e-316	1.2766e-314	TRUE
s_65933	CCZ1B	12272	911.24	12272	911.24	6103	6570700000	558.61	38035	1	1.0766e-316	2.1532e-316	2.3585e-314	TRUE
s_10185	KIR2DL4	27528	2479.4	27528	2479.4	64421	49733000000	4192	37.87	1	6.1477e-314	0	1.3449e-307	TRUE
s_46018	ISLR2	0.66332	38851	0.66332	38851	45825	1144.1	10196	37818	1	0	0	8.2921e-307	TRUE
s_67711	ZADH2	0.66332	38851	0.66332	38851	45825	1144.1	10196	37818	1	0	0	8.2921e-307	TRUE
s_49184	BHLHE41	26201	2327.5	26201	2327.5	64196	43762000000	3704.4	37811	1	0	0	1.2043e-306	TRUE
s_21328	NPRL3	2985	166	2985	166	53891	20964	18616	37782	1	0	0	3.2107e-306	TRUE
s_27893	TUBB3	36161	105.96	36161	105.96	51608	8475.7	76302	37638	1	3.3148e-306	6.6296e-306	7.1905e-304	TRUE
s_16335	RPL10	36161	105.96	36161	105.96	51608	8475.7	76302	37638	1	3.3148e-306	6.6296e-306	7.1905e-304	TRUE
s_64482	GRAMD2	36151	3461.3	36151	3461.3	65422	97555000000	8298.1	37.6	1	1.643e-306	3.286e-306	3.559e-304	TRUE
s_63499	ANKFN1	53398	5640.5	53398	5640.5	66964	261670000000	22080	37.6	1	1.6953e-305	3.3906e-305	3.6672e-303	TRUE
s_41476	DET1	31508	2910.3	31508	2910.3	64847	68708000000	5879.3	37545	1	1.3048e-304	2.6096e-304	2.8186e-302	TRUE
s_70109	TAS2R42	38805	3768.6	38805	3768.6	65653	115820000000	9911	37465	1	2.6503e-303	5.3006e-303	5.7171e-301	TRUE
s_74306	SPAG11A	13598	1017.2	13598	1017.2	61241	8195300000	720.8	37381	1	5.7098e-302	1.142e-302	1.23e-303	TRUE
s_17812	SUMO2	11277	798.21	11277	798.21	60246	5012700000	452.99	36974	1	2.1447e-295	4.2895e-295	4.6136e-293	TRUE
s_04187	CTF1	53066	317.87	53066	317.87	24228	77758	71707	36911	1	2.057e-295	4.1139e-294	4.4187e-292	TRUE
s_05975	F10	19568	1578.8	19568	1578.8	62632	19919000000	1785.3	36902	1	3.179e-295	6.358e-295	6.8195e-292	TRUE
s_22623	EIF3H	25.87	2235.7	25.87	2235.7	63793	40256000000	3588.1	36892	1	4.7164e-294	9.4327e-294	1.0103e-291	TRUE
s_69641	PAQR9	34639	847.66	34639	847.66	60353	5655300000	521.92	36582	1	4.0221e-289	8.0441e-289	8.6042e-287	TRUE
s_23911	INA	36483	201.32	36483	201.32	54438	30819	29535	36373	1	7.6988e-286	1.5398e-285	1.6447e-283	TRUE
s_29193	MTHFD2	36161	102.43	36161	102.43	51123	7881.7	76302	36.36	1	1.2052e-285	2.4103e-285	2.5675e-283	TRUE
s_53264	HSDL2	36161	102.43	36161	102.43	51123	7881.7	76302	36.36	1	1.2052e-285	2.4103e-285	2.5675e-283	TRUE
s_07378	GNG11	16583	84766	16583	84766	50118	5387.5	52248	36359	1	1.2476e-285	2.4952e-285	2.6543e-283	TRUE
s_31561	PDXDC1	33166	180.13	33166	180.13	5391	24611	23688	36328	1	3.8193e-285	7.6387e-285	8.1145e-283	TRUE
s_31653	SWAP70	39799	222.51	39799	222.51	54881	37725	36196	36323	1	4.7146e-285	9.4291e-285	1.0003e-282	TRUE
s_42675	DNAH3	59699	360.26	59699	360.26	56957	99993	95253	36301	1	1.0774e-284	2.1549e-284	2.2828e-282	TRUE
s_24207	FAIM3	2985	158.94	2985	158.94	53268	19101	18616	36145	1	2.9529e-282	5.9058e-282	6.2479e-280	TRUE
s_58580	SLC24A4	33.83	3058.6	33.83	3058.6	64569	7572000000	7026	36086	1	2.8216e-281	5.6431e-281	5.9619e-279	TRUE
s_09214	IFNA5	21226	1695.3	21226	1695.3	6254	22943000000	2187.6	35793	1	1.0585e-276	2.1169e-276	2.2334e-274	TRUE
s_40499	IL17RD	64674	6820.1	64674	6820.1	66985	382510000000	35721	35743	1	6.6242e-276	1.3248e-275	1.3959e-273	TRUE
s_23224	LDB1	43116	240.17	43116	240.17	55048	43937	43709	35675	1	6.4454e-275	1.2891e-274	1.3564e-272	TRUE
s_05959	F5	20895	1656.5	20895	1656.5	62423	21885000000	2103.2	35664	1	1.0504e-274	2.1007e-274	2.2074e-272	TRUE
s_42195	UBE2W	30845	2670.1	30845	2670.1	63903	57434000000	5574.1	35351	1	7.3297e-270	1.4659e-269	1.5383e-267	TRUE
s_00510	JAG1	43116	4058.2	43116	4058.2	65237	133870000000	12909	35338	1	1.1775e-269	2.3551e-269	2.4679e-267	TRUE
s_40277	UGT1A5	2985	155.4	2985	155.4	52946	18204	18616	35326	1	1.5298e-269	3.0596e-269	3.2018e-267	TRUE
s_22153	LIPF	28855	2454.7	28855	2454.7	6362	48446000000	4716.4	35323	1	1.9811e-269	3.9622e-269	4.1408e-267	TRUE
s_35007	HSPB8	18241	1384.5	18241	1384.5	61701	15211000000	1498.3	35297	1	4.7428e-269	9.4856e-269	9.8999e-267	TRUE
s_51787	NIPA2	43116	236.64	43116	236.64	54835	42567	43709	35141	1	1.0737e-266	2.1474e-266	2.2382e-264	TRUE
s_48694	METRN	18241	1377.5	18241	1377.5	61627	15048000000	1498.3	35115	1	2.9414e-266	5.8828e-266	6.1233e-264	TRUE
s_51396	BHLHB9	36161	98894	36161	98894	50622	7310	76302	35081	1	8.5536e-266	1.7107e-265	1.7759e-263	TRUE
s_10523	LBR	36161	98894	36161	98894	50622	7310	76302	35081	1	8.5536e-266	1.7107e-265	1.7759e-263	TRUE
s_03575	COL4A4	23216	116.55	23216	116.55	51453	10176	10632	35034	1	4.5042e-265	9.0084e-265	9.3389e-263	TRUE
s_52596	MIXL1	38805	3514.3	38805	3514.3	64646	9998000000	9911	34.91	1	3.9698e-263	7.9396e-263	8.2199e-261	TRUE
s_06414	FOXE1	99499	646.34	99499	646.34	58855	3251500000	332.42	34904	1	4.4921e-263	8.9842e-263	9.289e-262	TRUE
s_63106	MAMDC4	26533	134.21	26533	134.21	52099	13516	14278	34817	1	8.9791e-262	1.7958e-261	1.8543e-259	TRUE
s_31823	PHF8	92865	589.83	92865	589.83	58439	2699900000	280.41	34669	1	1.6274e-259	3.2548e-259	3.3562e-257	TRUE
s_24023	NEMF	39799	211.92	39799	211.92	5418	33986	36196	34562	1	6.3615e-258	1.2723e-257	1.3102e-255	TRUE
s_28925	GMEB1	0.99499	49447	0.99499	49447	46603	1818.6	19824	34412	1	1.0911e-255	2.1822e-255	2.2354e-253	TRUE
s_30959	DLGAP4	0.99499	49447	0.99499	49447	46603	1818.6	19824	34412	1	1.0911e-255	2.1822e-255	2.2354e-253	TRUE
s_39921	SEMA5B	0.99499	49447	0.99499	49447	46603	1818.6	19824	34412	1	1.0911e-255	2.1822e-255	2.2354e-253	TRUE
s_65592	OTUD1	0.99499	49447	0.99499	49447	46603	1818.6	19824	34412	1	1.0911e-255	2.1822e-255	2.2354e-253	TRUE
s_45494	REXO1	37.81	3348.3	37.81	3348.3	64313	90539000000	9285.9	34354	1	9.4411e-255	1.8882e-254	1.9317e-252	TRUE
s_08535	HMX1	0.66332	35319	0.66332	35319	44486	932.9	10196	34321	1	2.5923e-254	5.1847e-254	5.2899e-252	TRUE
s_33962	LETMD1	0.66332	35319	0.66332	35319	44486	932.9	10196	34321	1	2.5923e-254	5.1847e-254	5.2899e-252	TRUE
s_00835	ANXA4	42784	3895.7	42784	3895.7	64757	122940000000	12661	34241	1	4.5507e-253	9.1014e-253	9.274e-252	TRUE
s_76558	Non-TargetingControl	63679	6378.7	63679	6378.7	6624	332880000000	34357	34069	1	1.6466e-250	3.2932e-250	3.3513e-248	TRUE
s_60647	SLITRK4	12603	844.13	12603	844.13	59572	5568500000	596.83	34037	1	4.531e-251	9.062e-251	9.2096e-248	TRUE
s_74446	BOLA2B	13266	63575	13266	63575	47946	2997.2	33618	33.95	1	8.0418e-249	1.6084e-248	1.6281e-246	TRUE
s_16624	RPS28	13266	63575	13266	63575	47946	2997.2	33618	33.95	1	8.0418e-249	1.6084e-248	1.6281e-246	TRUE
s_44054	PCDHA1	13266	63575	13266	63575	47946	2997.2	33618	33.95	1	8.0418e-249	1.6084e-248	1.6281e-246	TRUE
s_76307	CT45A7	26533	130.68	26533	130.68	51717	12764	14278	33882	1	8.1039e-248	1.6208e-247	1.6386e-245	TRUE
s_13374	PCBD1	36161	95362	36161	95362	50103	6760.6	76302	33803	1	1.1852e-246	2.3705e-246	2.3934e-244	TRUE
s_32822	ATP1B4	32171	2691.3	32171	2691.3	63428	58131000000	6194.4	33787	1	2.361e-247	4.722e-247	4.7614e-244	TRUE
s_42514	AP1AR	60363	5887.7	60363	5887.7	65845	282840000000	30039	33623	1	6.1691e-244	1.2338e-243	1.2425e-241	TRUE
s_38110	PLCE1	33498	2797.3	33498	2797.3	63419	62787000000	6854.7	33382	1	1.9072e-240	3.8145e-240	3.8363e-238	TRUE
s_02418	CBFB	41789	3680.3	41789	3680.3	64268	109320000000	11936	33304	1	2.6049e-239	5.2097e-239	5.2328e-237	TRUE
s_61697	UNC45B	66332	6558.8	66332	6558.8	66062	351480000000	38066	33277	1	6.6025e-239	1.3205e-238	1.3246e-236	TRUE
s_71823	ANKRD34C	0	21192	0.33166	21192	40587	395.17	0.39404	33231	1	2.7577e-238	5.5154e-238	5.4829e-236	TRUE
s_51553	OR4A15	0.33166	21192	0.33166	21192	40587	340.18	0.39404	33231	1	2.7577e-238	5.5154e-238	5.4829e-236	TRUE
s_27743	IKZF1	0	21192	0.33166	21192	40587	395.17	0.39404	33231	1	2.7577e-238	5.5154e-238	5.4829e-236	TRUE
s_06387	FOXD1	0	21192	0.33166	21192	40587	395.17	0.39404	33231	1	2.7577e-238	5.5154e-238	5.4829e-236	TRUE
s_74124	SYNDIG1L	0	21192	0.33166	21192	40587	395.17	0.39404	33231	1	2.7577e-238	5.5154e-238	5.4829e-236	TRUE
s_45780	PTCHD2	0	21192	0.33166	21192	40587	395.17	0.39404	33231	1	2.7577e-238	5.5154e-238	5.4829e-236	TRUE
s_30369	ADAMTS7	0	21192	0.33166	21192	40587	395.17	0.39404	33231	1	2.7577e-238	5.5154e-238	5.4829e-236	TRUE
s_77404	Non-TargetingControl	52734	4909.4	52734	4909.4	65138	19570000000	21398	33201	1	8.1651e-238	1.633e-238	1.6213e-235	TRUE
s_01956	SERPING1	44774	3998.1	44774	3998.1	6449	129220000000	14191	33186	1	1.3237e-237	2.6473e-237	2.625e-236	TRUE
s_28943	CORIN	37478	3185.8	37478	3185.8	63719	81601000000	9083	33034	1	2.0044e-235	4.0088e-235	3.9699e-233	TRUE
s_29650	CBX1	30845	2497.1	30845	2497.1	62936	49858000000	5574.1	33033	1	2.0703e-235	4.1407e-235	4.0953e-233	TRUE
s_36226	DCPS	43116	222.51	43116	222.51	53951	37310	43709	33004	1	4.7751e-235	9.5502e-235	9.4334e-233	TRUE
s_09635	INPP5B	63016	349.66	63016	349.66	55857	93145	108.58	32951	1	2.8265e-234	5.653e-235	5.5767e-232	TRUE
s_00859	AOAH	26533	127.15	26533	127.15	51325	12034	14278	32947	1	3.0553e-234	6.1106e-234	6.0128e-232	TRUE
s_41294	RMND1	26533	127.15	26533	127.15	51325	12034	14278	32947	1	3.0553e-234	6.1106e-234	6.0128e-232	TRUE
s_05609	SLC29A1	37146	3104.6	37146	3104.6	63472	77347000000	8882.7	32546	1	1.8193e-228	3.6387e-228	3.5759e-226	TRUE
s_31106	ZHX2	36161	91.83	36161	91.83	49564	6233.3	76302	32524	1	3.2067e-228	6.4133e-228	6.2868e-226	TRUE
s_58775	CANT1	36161	91.83	36161	91.83	49564	6233.3	76302	32524	1	3.2067e-228	6.4133e-228	6.2868e-226	TRUE
s_34565	CHTOP	57378	5322.6	57378	5322.6	65108	229950000000	26447	32376	1	4.6331e-226	9.2661e-226	9.0718e-224	TRUE
s_66726	CDRT15L2	23216	1716.5	23216	1716.5	61482	23312000000	2737	32367	1	6.0414e-226	1.2083e-225	1.1814e-223	TRUE
s_19375	TNFAIP3	78936	7925.6	78936	7925.6	66317	514050000000	58923	32326	1	2.4372e-225	4.8745e-225	4.7602e-223	TRUE
s_34783	STAP1	89549	526.26	89549	526.26	5727	2127400000	256.39	32307	1	3.924e-226	7.848e-226	7.6543e-223	TRUE
s_52526	ROPN1L	54393	4965.9	54393	4965.9	64865	199820000000	23128	32296	1	6.2184e-225	1.2437e-224	1.2115e-222	TRUE
s_37184	CRNN	49749	257.83	49749	257.83	54369	50141	61431	32261	1	1.6634e-224	3.3268e-224	3.2365e-222	TRUE
s_67869	NWD1	23548	1741.2	23548	1741.2	61492	23989000000	2835.8	32255	1	2.1961e-224	4.3921e-224	4.2676e-222	TRUE
s_13067	OPRM1	48423	4266.6	48423	4266.6	64321	146940000000	17274	32094	1	4.1418e-222	8.2835e-222	8.0386e-220	TRUE
s_73207	PRAMEF7	13266	60043	13266	60043	47135	2650.2	33618	32023	1	3.3616e-221	6.7232e-221	6.5162e-219	TRUE
s_00181	ACTA2	26533	123.62	26533	123.62	50922	11326	14278	32013	1	4.812e-222	9.624e-222	9.3162e-219	TRUE
s_21265	KMT2D	53398	4789.3	53398	4789.3	64604	185510000000	22080	31871	1	5.193e-220	1.0386e-218	1.0041e-216	TRUE
s_72207	FAM174B	11608	713.45	11608	713.45	58244	3934200000	486.72	31813	1	3.0824e-218	6.1649e-218	5.9528e-216	TRUE
s_02420	CBFB	49749	254.3	49749	254.3	54171	48680	61431	31811	1	3.1383e-218	6.2765e-218	6.053e-217	TRUE
s_53106	POMK	26865	2023.8	26865	2023.8	61832	32478000000	3943.6	31799	1	5.0108e-218	1.0022e-217	9.6528e-216	TRUE
s_42443	TBC1D2	16583	74.17	16583	74.17	48216	4042.7	52248	31723	1	4.8531e-217	9.7063e-217	9.3258e-215	TRUE
s_08625	TLX2	16583	74.17	16583	74.17	48216	4042.7	52248	31723	1	4.8531e-217	9.7063e-217	9.3258e-215	TRUE
s_60798	ASB5	43116	3623.8	43116	3623.8	63604	105450000000	12909	31515	1	4.2338e-214	8.4676e-214	8.1256e-212	TRUE
s_05982	F12	92865	536.85	92865	536.85	57084	2209100000	280.41	31505	1	5.1906e-214	1.0381e-213	9.9496e-212	TRUE
s_09763	ITGA5	26201	1942.6	26201	1942.6	61589	29867000000	3704.4	31486	1	1.0084e-213	2.0169e-213	1.9306e-211	TRUE
s_52909	SLC41A2	79599	441.49	79599	441.49	5626	1485300000	191.98	31289	1	4.5648e-211	9.1296e-211	8.7284e-209	TRUE
s_50594	FAM192A	36161	88298	36161	88298	49004	5728.2	76302	31245	1	1.6941e-210	3.3883e-210	3.2314e-208	TRUE
s_69103	ZC3H12D	36161	88298	36161	88298	49004	5728.2	76302	31245	1	1.6941e-210	3.3883e-210	3.2314e-208	TRUE
s_34436	LTN1	2985	137.75	2985	137.75	51217	14049	18616	31233	1	2.4828e-210	4.9657e-210	4.73e-212	TRUE
s_74083	SPINK8	47759	4061.7	47759	4061.7	63806	132650000000	16686	31074	1	4.2367e-208	8.4734e-208	8.0613e-206	TRUE
s_45568	PLEKHH1	46101	3885.1	46101	3885.1	63664	121250000000	15270	31067	1	5.221e-209	1.0442e-207	9.9219e-206	TRUE
s_16331	RPL9	39799	190.72	39799	190.72	52668	27111	36196	31039	1	1.0621e-207	2.1241e-207	2.0158e-205	TRUE
s_37515	DERL2	13598	844.13	13598	844.13	58553	5515200000	720.8	30935	1	2.9181e-206	5.8362e-206	5.5319e-204	TRUE
s_01715	CEACAM1	20563	1409.2	20563	1409.2	60312	15568000000	2020.8	30892	1	1.137e-206	2.274e-206	2.1528e-203	TRUE
s_32744	NCS1	17578	1158.5	17578	1158.5	59637	10469000000	1366	30869	1	2.307e-206	4.6139e-205	4.3627e-203	TRUE
s_12327	NDUFB4	0.66332	31787	0.66332	31787	4301	743.89	10196	30823	1	8.6832e-205	1.7366e-204	1.6381e-202	TRUE
s_33444	ZKSCAN5	0.66332	31787	0.66332	31787	4301	743.89	10196	30823	1	8.6832e-205	1.7366e-204	1.6381e-202	TRUE
s_08436	HLA-DRA	23.88	1684.7	23.88	1684.7	60823	22331000000	2936.8	30647	1	2.1458e-202	4.2917e-202	4.0432e-200	TRUE
s_04330	CYLD	31508	2380.5	31508	2380.5	61949	44954000000	5879.3	30635	1	3.147e-203	6.294e-203	5.9224e-200	TRUE
s_50285	GGNBP2	21226	1444.6	21226	1444.6	60232	16345000000	2187.6	30431	1	1.5675e-199	3.135e-200	2.9463e-197	TRUE
s_42703	SUPT20H	2985	134.21	2985	134.21	50845	13285	18616	30415	1	2.3162e-199	4.6325e-199	4.3432e-197	TRUE
s_39436	TMEM8B	2985	134.21	2985	134.21	50845	13285	18616	30415	1	2.3162e-199	4.6325e-199	4.3432e-197	TRUE
s_71693	OR4D10	10613	607.49	10613	607.49	57114	2825300000	389.89	30228	1	7.1087e-197	1.4217e-196	1.3313e-194	TRUE
s_16515	RPS6KA1	16583	70638	16583	70638	47522	3638.7	52248	30178	1	3.0023e-196	6.0045e-196	5.5956e-194	TRUE
s_54800	PAQR8	16583	70638	16583	70638	47522	3638.7	52248	30178	1	3.0023e-196	6.0045e-196	5.5956e-194	TRUE
s_49212	KREMEN2	16583	70638	16583	70638	47522	3638.7	52248	30178	1	3.0023e-196	6.0045e-196	5.5956e-194	TRUE
s_35370	TRUB2	16583	70638	16583	70638	47522	3638.7	52248	30178	1	3.0023e-196	6.0045e-196	5.5956e-194	TRUE
s_66871	RNF214	31176	2313.4	31176	2313.4	61685	42366000000	5725.4	30162	1	5.714e-197	1.1428e-195	1.0637e-193	TRUE
s_27342	NUTF2	26533	116.55	26533	116.55	5008	9978.1	14278	30143	1	8.7037e-196	1.7407e-195	1.6183e-193	TRUE
s_06117	EFEMP1	13266	56511	13266	56511	46275	2325.2	33618	30097	1	3.4499e-195	6.8998e-195	6.3991e-193	TRUE
s_17876	SNRPB2	13266	56511	13266	56511	46275	2325.2	33618	30097	1	3.4499e-195	6.8998e-195	6.3991e-193	TRUE
s_74461	MSMP	42453	3394.2	42453	3394.2	62879	91995000000	12417	30079	1	6.9938e-195	1.3988e-194	1.2957e-192	TRUE
s_43433	ADAP2	18241	1179.7	18241	1179.7	59392	1083000000	1498.3	30005	1	6.1971e-194	1.2394e-193	1.1467e-191	TRUE
s_76503	Non-TargetingControl	80926	7590.1	80926	7590.1	65339	468160000000	62725	29983	1	1.3163e-193	2.6326e-193	2.4329e-191	TRUE
s_59640	PIGU	26533	1879	26533	1879	60934	27791000000	3822.9	29961	1	2.3964e-193	4.7929e-193	4.4239e-191	TRUE
s_17507	SLC5A3	51739	4330.1	51739	4330.1	63597	15050000000	20399	29956	1	2.9028e-193	5.8055e-193	5.3522e-191	TRUE
s_16705	RYR3	39799	183.66	39799	183.66	52126	24997	36196	29865	1	3.7223e-192	7.4445e-192	6.8551e-190	TRUE
s_44456	FSTL5	99499	550.98	99499	550.98	56556	2313500000	332.42	29674	1	1.1709e-189	2.3418e-189	2.1538e-187	TRUE
s_59512	C1orf162	66332	335.53	66332	335.53	54623	84663	122.99	29657	1	1.9112e-189	3.8225e-189	3.5115e-187	TRUE
s_25633	RAPGEF2	23216	98894	23216	98894	49104	7144.6	10632	29618	1	5.7806e-189	1.1561e-188	1.0595e-186	TRUE
s_20264	WNT2	23216	98894	23216	98894	49104	7144.6	10632	29618	1	5.7806e-189	1.1561e-188	1.0595e-186	TRUE
s_01565	BAG1	2985	130.68	2985	130.68	50463	12542	18616	29596	1	1.1064e-188	2.2128e-188	2.0256e-186	TRUE
s_53977	RETNLB	23216	1568.2	23216	1568.2	60179	19245000000	2737	29531	1	8.5516e-188	1.7103e-187	1.5637e-185	TRUE
s_43566	CISD1	69649	353.19	69649	353.19	54747	93851	138.51	29419	1	2.1904e-186	4.3808e-186	4.0006e-184	TRUE
s_26090	ARMCX2	53066	254.3	53066	254.3	53392	48228	71707	29404	1	3.3359e-186	6.6718e-186	6.0856e-184	TRUE
s_49385	VCPKMT	0.99499	42383	0.99499	42383	44427	1304.6	19824	29395	1	4.1623e-186	8.3246e-186	7.5754e-184	TRUE
s_24729	2015-09-01	0.99499	42383	0.99499	42383	44427	1304.6	19824	29395	1	4.1623e-186	8.3246e-186	7.5754e-184	TRUE
s_08405	HLA-DOB	36483	162.47	36483	162.47	51362	19450	29535	29224	1	6.4538e-184	1.2908e-183	1.1732e-181	TRUE
s_42768	KIF21A	26533	113.02	26533	113.02	4964	9337	14278	29208	1	9.9966e-184	1.9993e-183	1.813e-182	TRUE
s_36676	UBN1	26533	113.02	26533	113.02	4964	9337	14278	29208	1	9.9966e-184	1.9993e-183	1.813e-182	TRUE
s_12450	NEK3	73629	6562.3	73629	6562.3	64585	348060000000	49473	29173	1	3.4319e-183	6.8639e-183	6.2169e-181	TRUE
s_11483	MICB	35.82	2656	35.82	2656	61732	5584000000	8108.6	29098	1	2.9207e-182	5.8414e-182	5.2847e-180	TRUE
s_70566	CYSRT1	20895	1352.7	20895	1352.7	59502	14243000000	2103.2	29041	1	1.4814e-181	2.9628e-181	2.6773e-179	TRUE
s_44749	STOX2	15.92	960.68	15.92	960.68	58288	7117700000	1067	28923	1	4.5135e-180	9.027e-181	8.1475e-178	TRUE
s_00898	APC	50744	4079.4	50744	4079.4	63012	132970000000	19429	28903	1	8.6173e-180	1.7235e-179	1.5537e-177	TRUE
s_74457	PCP4L1	34493	2514.7	34493	2514.7	61473	49957000000	7376.5	28878	1	1.7177e-179	3.4353e-179	3.0934e-177	TRUE
s_02079	PTTG1IP	33.83	2451.2	33.83	2451.2	61376	47427000000	7026	28839	1	5.3047e-179	1.0609e-178	9.5425e-177	TRUE
s_47970	TNS3	23.88	1585.8	23.88	1585.8	5995	19639000000	2936.8	28822	1	8.3924e-179	1.6785e-178	1.5079e-176	TRUE
s_22903	PABPC4	17.91	1105.5	17.91	1105.5	58707	9453800000	1431.2	28748	1	7.0216e-178	1.4043e-177	1.2602e-175	TRUE
s_35423	FOXB1	21558	1391.6	21558	1391.6	5948	15068000000	2274	28729	1	1.2134e-177	2.4269e-177	2.1752e-175	TRUE
s_44830	YAE1D1	36161	81234	36161	81234	47815	4784.3	76302	28688	1	3.523e-178	7.046e-178	6.2936e-175	TRUE
s_19285	TLR4	36161	81234	36161	81234	47815	4784.3	76302	28688	1	3.523e-178	7.046e-178	6.2936e-175	TRUE
s_58039	ZNF511	36161	81234	36161	81234	47815	4784.3	76302	28688	1	3.523e-178	7.046e-178	6.2936e-175	TRUE
s_70925	C15orf52	16583	67107	16583	67107	46792	3256.8	52248	28633	1	1.7104e-176	3.4208e-176	3.045e-175	TRUE
s_39982	FAM134B	16583	67107	16583	67107	46792	3256.8	52248	28633	1	1.7104e-176	3.4208e-176	3.045e-175	TRUE
s_10643	LIG1	16583	67107	16583	67107	46792	3256.8	52248	28633	1	1.7104e-176	3.4208e-176	3.045e-175	TRUE
s_55793	R3HDM4	11608	642.81	11608	642.81	56742	3149400000	486.72	28611	1	3.5153e-176	7.0307e-176	6.251e-175	TRUE
s_76035	EPPIN-WFDC6	36483	158.94	36483	158.94	51047	18550	29535	28574	1	9.465e-177	1.893e-176	1.6811e-173	TRUE
s_58724	ANKS3	53066	247.23	53066	247.23	52987	45394	71707	28.57	1	1.089e-176	2.178e-176	1.932e-174	TRUE
s_30044	TPPP	26201	1751.8	26201	1751.8	60099	23987000000	3704.4	28353	1	5.8463e-173	1.1693e-172	1.036e-171	TRUE
s_25197	SEC22B	10945	589.83	10945	589.83	56283	2641500000	420.72	28222	1	2.2049e-171	4.4098e-171	3.9028e-169	TRUE
s_72358	DTHD1	43116	190.72	43116	190.72	51737	26788	43709	28196	1	4.399e-172	8.798e-172	7.7688e-169	TRUE
s_13806	PGGT1B	43116	190.72	43116	190.72	51737	26788	43709	28196	1	4.399e-172	8.798e-172	7.7688e-169	TRUE
s_43381	LMBRD1	10282	543.92	10282	543.92	5594	2240300000	360.46	28107	1	5.6875e-170	1.1375e-169	1.0033e-167	TRUE
s_48189	VWA1	2985	123.62	2985	123.62	49668	11124	18616	27959	1	3.3894e-168	6.7787e-168	5.9586e-166	TRUE
s_18102	SPRR1B	2985	123.62	2985	123.62	49668	11124	18616	27959	1	3.3894e-168	6.7787e-168	5.9586e-166	TRUE
s_10621	LHB	2985	123.62	2985	123.62	49668	11124	18616	27959	1	3.3894e-168	6.7787e-168	5.9586e-166	TRUE
s_33826	BACE2	36483	155.4	36483	155.4	50724	17672	29535	27924	1	9.1038e-168	1.8208e-167	1.5986e-165	TRUE
s_54091	LNX1	60031	4863.5	60031	4863.5	63166	189170000000	29626	27907	1	1.7184e-167	3.4369e-167	3.0142e-165	TRUE
s_35437	ATP2C1	40794	2995.1	40794	2995.1	61636	70926000000	11236	27871	1	4.5961e-167	9.1922e-167	8.0526e-165	TRUE
s_51970	KRTAP1-1	60694	4923.5	60694	4923.5	63187	19390000000	30455	27865	1	5.5735e-167	1.1147e-166	9.754e-166	TRUE
s_36015	BHLHE22	12603	692.26	12603	692.26	56714	3648700000	596.83	27.82	1	1.7637e-166	3.5274e-166	3.0831e-164	TRUE
s_71907	LOC391003	10282	536.85	10282	536.85	55752	2178400000	360.46	27735	1	1.8719e-165	3.7437e-165	3.2648e-163	TRUE
s_30952	COBLL1	46433	204.85	46433	204.85	51889	30896	52109	27735	1	1.7942e-165	3.5883e-165	3.1328e-163	TRUE
s_44632	CCDC177	0	17.66	0.33166	17.66	38086	271.36	0.39404	27604	1	7.0506e-164	1.4101e-163	1.2201e-161	TRUE
s_74287	ASAH2B	0	17.66	0.33166	17.66	38086	271.36	0.39404	27604	1	7.0506e-164	1.4101e-163	1.2201e-161	TRUE
s_06193	FDX1	0.33166	17.66	0.33166	17.66	38086	230.19	0.39404	27604	1	7.0506e-164	1.4101e-163	1.2201e-161	TRUE
s_00518	AGTR1	0	17.66	0.33166	17.66	38086	271.36	0.39404	27604	1	7.0506e-164	1.4101e-163	1.2201e-161	TRUE
s_43818	BCAP29	0	17.66	0.33166	17.66	38086	271.36	0.39404	27604	1	7.0506e-164	1.4101e-163	1.2201e-161	TRUE
s_72213	C17orf97	0	17.66	0.33166	17.66	38086	271.36	0.39404	27604	1	7.0506e-164	1.4101e-163	1.2201e-161	TRUE
s_32710	FBXO46	0	17.66	0.33166	17.66	38086	271.36	0.39404	27604	1	7.0506e-164	1.4101e-163	1.2201e-161	TRUE
s_58111	AGAP4	39799	169.53	39799	169.53	50978	21036	36196	27517	1	7.3472e-163	1.4694e-162	1.27e-164	TRUE
s_74313	FOXD4L5	14925	844.13	14925	844.13	57298	5447700000	908.6	27509	1	9.9109e-163	1.9822e-162	1.7113e-160	TRUE
s_52393	SH3BGRL2	44774	3316.5	44774	3316.5	61794	87058000000	14191	27464	1	3.6647e-162	7.3294e-162	6.3206e-160	TRUE
s_66562	CCDC108	50744	3878.1	50744	3878.1	62282	119480000000	19429	27458	1	4.307e-163	8.6141e-162	7.4203e-160	TRUE
s_61720	TMEM199	23216	91.83	23216	91.83	48046	6086.7	10632	27451	1	4.386e-163	8.772e-163	7.5396e-160	TRUE
s_05388	MEGF9	23216	91.83	23216	91.83	48046	6086.7	10632	27451	1	4.386e-163	8.772e-163	7.5396e-160	TRUE
s_38314	UBAP1	33.83	2334.6	33.83	2334.6	60673	42771000000	7026	27448	1	5.5162e-162	1.1032e-161	9.4718e-160	TRUE
s_10868	LTK	36161	77702	36161	77702	47182	4345.3	76302	27409	1	1.3871e-161	2.7742e-161	2.3792e-159	TRUE
s_27736	TNIP1	86232	427.36	86232	427.36	54762	1369900000	233.66	27394	1	2.2749e-161	4.5499e-161	3.8976e-159	TRUE
s_48657	C7orf49	26533	105.96	26533	105.96	48717	8121.1	14278	27339	1	9.6209e-161	1.9242e-160	1.6465e-158	TRUE
s_74357	PHLDB3	0.66332	28255	0.66332	28255	41366	576.96	10196	27325	1	1.4321e-160	2.8642e-160	2.4428e-158	TRUE
s_31643	HECW1	0.66332	28255	0.66332	28255	41366	576.96	10196	27325	1	1.4321e-160	2.8642e-160	2.4428e-158	TRUE
s_68207	SH3PXD2B	0.66332	28255	0.66332	28255	41366	576.96	10196	27325	1	1.4321e-160	2.8642e-160	2.4428e-158	TRUE
s_46558	CREBZF	82916	406.17	82916	406.17	54536	1235200000	212.2	27314	1	2.0341e-160	4.0682e-160	3.4659e-158	TRUE
s_36732	GPSM2	34639	635.75	34639	635.75	56208	3063800000	521.92	27305	1	2.6101e-160	5.2203e-160	4.4425e-158	TRUE
s_42814	TASP1	15.92	907.7	15.92	907.7	5747	6306400000	1067	27301	1	3.024e-161	6.0479e-160	5.1411e-158	TRUE
s_55584	TBL1Y	46433	201.32	46433	201.32	5164	29758	52109	27246	1	1.2676e-159	2.5351e-159	2.1527e-157	TRUE
s_19922	UCP2	45769	3380.1	45769	3380.1	61758	90396000000	14996	27228	1	2.3474e-159	4.6947e-159	3.9821e-157	TRUE
s_18482	SULT2B1	30845	2059.1	30845	2059.1	60155	33135000000	5574.1	27167	1	1.2118e-158	2.4235e-158	2.0534e-156	TRUE
s_69083	TMEM173	36483	2539.5	36483	2539.5	60827	50661000000	8490.3	27164	1	1.3236e-158	2.6472e-158	2.2404e-156	TRUE
s_69106	MYLK4	2985	120.09	2985	120.09	49253	10448	18616	27.14	1	2.1739e-158	4.3478e-158	3.6717e-156	TRUE
s_65287	OR5M3	2985	120.09	2985	120.09	49253	10448	18616	27.14	1	2.1739e-158	4.3478e-158	3.6717e-156	TRUE
s_25611	VGLL4	16583	63575	16583	63575	46024	2896.8	52248	27088	1	8.9764e-158	1.7953e-157	1.5128e-155	TRUE
s_54341	PARP10	16583	63575	16583	63575	46024	2896.8	52248	27088	1	8.9764e-158	1.7953e-157	1.5128e-155	TRUE
s_05613	EP300	143.61	14050	143.61	14050	66024	1611300000000	2650600000	27011	1	8.9819e-157	1.7964e-156	1.5121e-154	TRUE
s_43438	LRP2BP	33166	134.21	33166	134.21	49692	13069	23688	26895	1	1.6892e-155	3.3785e-155	2.8407e-153	TRUE
s_51182	TRAF3IP3	59699	268.43	59699	268.43	52726	53231	95253	26892	1	1.8807e-155	3.7615e-155	3.1594e-153	TRUE
s_33455	SMPX	0.99499	38851	0.99499	38851	43202	1080.6	19824	26887	1	2.0671e-155	4.1341e-155	3.4611e-153	TRUE
s_44087	STK31	0.99499	38851	0.99499	38851	43202	1080.6	19824	26887	1	2.0671e-155	4.1341e-155	3.4611e-153	TRUE
s_66194	CTAG1A	0.99499	38851	0.99499	38851	43202	1080.6	19824	26887	1	2.0671e-155	4.1341e-155	3.4611e-153	TRUE
s_37345	AK3	21226	1278.6	21226	1278.6	58472	12606000000	2187.6	26882	1	2.6288e-155	5.2577e-155	4.397e-154	TRUE
s_52315	SELO	34825	2369.9	34825	2369.9	60484	4.4e+06	7555.6	26864	1	4.4198e-155	8.8395e-155	7.3845e-153	TRUE
s_62236	COMMD7	34639	625.15	34639	625.15	55966	2955500000	521.92	26842	1	7.5409e-155	1.5082e-154	1.2586e-152	TRUE
s_25291	RBM39	36483	148.34	36483	148.34	50058	15982	29535	26624	1	2.376e-153	4.752e-153	3.957e-151	TRUE
s_17920	SNX1	36483	148.34	36483	148.34	50058	15982	29535	26624	1	2.376e-153	4.752e-153	3.957e-151	TRUE
s_39010	CINP	10282	512.13	10282	512.13	55073	196900000	360.46	26433	1	4.0756e-150	8.1512e-150	6.7802e-148	TRUE
s_01455	ATP6V1B1	26533	102.43	26533	102.43	48233	7546	14278	26404	1	8.0628e-150	1.6126e-149	1.3399e-147	TRUE
s_22836	MYOM1	49749	211.92	49749	211.92	51552	32886	61431	26403	1	8.5849e-150	1.717e-150	1.4251e-147	TRUE
s_35421	FOXD3	27196	1709.5	27196	1709.5	59227	22663000000	4066.7	26.38	1	1.7535e-149	3.507e-150	2.9078e-147	TRUE
s_19222	TJP1	23216	88298	23216	88298	47487	5590.6	10632	26368	1	2.0832e-149	4.1665e-149	3.4509e-147	TRUE
s_21629	HIST1H2AL	2985	116.55	2985	116.55	48826	9794.4	18616	26322	1	7.1405e-149	1.4281e-148	1.1815e-146	TRUE
s_22451	USO1	96182	469.75	96182	469.75	54703	1651700000	305.74	26315	1	9.1643e-149	1.8329e-148	1.5148e-146	TRUE
s_56108	TTC30A	13266	49447	13266	49447	44384	1741.2	33618	26245	1	5.3877e-148	1.0775e-147	8.8489e-146	TRUE
s_03435	CLTC	13266	49447	13266	49447	44384	1741.2	33618	26245	1	5.3877e-148	1.0775e-147	8.8489e-146	TRUE
s_51493	KCNH6	13266	49447	13266	49447	44384	1741.2	33618	26245	1	5.3877e-148	1.0775e-147	8.8489e-146	TRUE
s_41926	SBNO1	13266	49447	13266	49447	44384	1741.2	33618	26245	1	5.3877e-148	1.0775e-147	8.8489e-146	TRUE
s_11048	MAGEB2	13266	49447	13266	49447	44384	1741.2	33618	26245	1	5.3877e-148	1.0775e-147	8.8489e-146	TRUE
s_72336	ASB18	13266	49447	13266	49447	44384	1741.2	33618	26245	1	5.3877e-148	1.0775e-147	8.8489e-146	TRUE
s_19389	TNNC1	42453	2956.2	42453	2956.2	60886	68659000000	12417	26149	1	7.8333e-147	1.5667e-146	1.2852e-144	TRUE
s_74515	TLCD2	36161	74.17	36161	74.17	4652	3928.2	76302	26131	1	1.0672e-146	2.1343e-146	1.7453e-144	TRUE
s_33524	PPIL2	36161	74.17	36161	74.17	4652	3928.2	76302	26131	1	1.0672e-146	2.1343e-146	1.7453e-144	TRUE
s_58571	TTC8	36161	74.17	36161	74.17	4652	3928.2	76302	26131	1	1.0672e-146	2.1343e-146	1.7453e-144	TRUE
s_39226	MRPS33	96182	466.21	96182	466.21	54595	1625200000	305.74	26113	1	1.8408e-146	3.6816e-146	3.0075e-144	TRUE
s_21266	KMT2D	95187	8109.3	95187	8109.3	63978	528920000000	94305	26097	1	3.1896e-146	6.3792e-146	5.2056e-144	TRUE
s_56410	B3GNT7	12272	628.68	12272	628.68	55682	2979800000	558.61	43338	1	4.3511e-146	8.7022e-146	7.0937e-144	TRUE
s_15995	RELA	43116	176.6	43116	176.6	50633	22687	43709	26059	1	7.1311e-146	1.4262e-145	1.1614e-143	TRUE
s_19740	TUFT1	22221	1310.3	22221	1310.3	58194	13204000000	2453	26008	1	2.9913e-145	5.9826e-145	4.8666e-143	TRUE
s_15210	PSMB10	36483	144.81	36483	144.81	49712	15170	29535	25974	1	6.4475e-145	1.2895e-144	1.0479e-142	TRUE
s_13487	PDCD1	33498	2182.7	33498	2182.7	59841	37121000000	6854.7	25959	1	1.0909e-144	2.1817e-144	1.771e-143	TRUE
s_15005	PRPH	16583	907.7	16583	907.7	56915	6271300000	1181.3	25928	1	2.3792e-144	4.7584e-144	3.8586e-142	TRUE
s_70788	SLC22A25	50081	3581.4	50081	3581.4	6132	10110000000	18797	25756	1	2.1268e-142	4.2535e-142	3.4456e-140	TRUE
s_00735	AMHR2	41458	2825.5	41458	2825.5	60569	62558000000	11699	25739	1	3.2583e-142	6.5166e-142	5.2732e-140	TRUE
s_30713	B4GALT7	11608	575.7	11608	575.7	55154	2486900000	486.72	25569	1	2.4054e-140	4.8108e-140	3.8889e-138	TRUE
s_68568	KRT73	16583	60043	16583	60043	45212	2558.6	52248	25543	1	4.341e-141	8.6821e-140	6.9746e-138	TRUE
s_73383	COA5	16583	60043	16583	60043	45212	2558.6	52248	25543	1	4.341e-141	8.6821e-140	6.9746e-138	TRUE
s_21573	BRAP	16583	60043	16583	60043	45212	2558.6	52248	25543	1	4.341e-141	8.6821e-140	6.9746e-138	TRUE
s_00455	AP2A2	16583	60043	16583	60043	45212	2558.6	52248	25543	1	4.341e-141	8.6821e-140	6.9746e-138	TRUE
s_61220	FAM76B	16583	60043	16583	60043	45212	2558.6	52248	25543	1	4.341e-141	8.6821e-140	6.9746e-138	TRUE
s_22709	CDC23	16583	60043	16583	60043	45212	2558.6	52248	25543	1	4.341e-141	8.6821e-140	6.9746e-138	TRUE
s_45657	MTA3	96182	455.62	96182	455.62	54264	1546800000	305.74	25507	1	1.1683e-139	2.3367e-139	1.8752e-137	TRUE
s_45770	SORCS2	2985	113.02	2985	113.02	48386	9162.3	18616	25503	1	1.2012e-139	2.4024e-139	1.9239e-137	TRUE
s_14997	PROS1	2985	113.02	2985	113.02	48386	9162.3	18616	25503	1	1.2012e-139	2.4024e-139	1.9239e-137	TRUE
s_46197	ALS2	49749	204.85	49749	204.85	51065	30564	61431	25502	1	1.2789e-139	2.5577e-139	2.0462e-137	TRUE
s_62256	IGSF5	33.83	2161.5	33.83	2161.5	59563	36313000000	7026	25384	1	2.8991e-138	5.7981e-138	4.6338e-136	TRUE
s_57860	ACAP3	73629	5718.2	73629	5718.2	62599	260260000000	49473	25377	1	3.5541e-138	7.1083e-138	5.675e-137	TRUE
s_10248	KLC1	23216	84766	23216	84766	46904	5116.5	10632	25285	1	3.0659e-137	6.1318e-137	4.8803e-135	TRUE
s_71992	DYTN	23216	84766	23216	84766	46904	5116.5	10632	25285	1	3.0659e-137	6.1318e-137	4.8803e-135	TRUE
s_04598	DDB1	23216	84766	23216	84766	46904	5116.5	10632	25285	1	3.0659e-137	6.1318e-137	4.8803e-135	TRUE
s_15180	PSMB3	53066	218.98	53066	218.98	51244	34942	71707	25233	1	1.186e-137	2.3721e-136	1.886e-135	TRUE
s_24638	ZFYVE9	11277	547.45	11277	547.45	54814	2241700000	452.99	25192	1	3.5143e-136	7.0286e-136	5.5826e-134	TRUE
s_69575	MSGN1	39799	155.4	39799	155.4	4973	17428	36196	25169	1	5.886e-137	1.1772e-135	9.3406e-134	TRUE
s_70720	SUMO4	43362	1105.5	43362	1105.5	57264	9322100000	1861.8	25159	1	8.2609e-136	1.6522e-135	1.3096e-133	TRUE
s_43172	ATF7IP	47096	3238.8	47096	3238.8	60738	82287000000	16111	25146	1	1.225e-136	2.45e-139	1.94e-137	TRUE
s_04307	CYB561	13598	685.19	13598	685.19	55548	3531400000	720.8	25015	1	3.0248e-134	6.0496e-134	4.7854e-132	TRUE
s_02399	RUNX2	43116	169.53	43116	169.53	50048	20769	43709	24991	1	5.1933e-134	1.0387e-133	8.2076e-132	TRUE
s_62143	METTL11B	12272	600.43	12272	600.43	5502	2699900000	558.61	24885	1	7.7519e-133	1.5504e-132	1.2239e-130	TRUE
s_73523	SLX1A	36161	70638	36161	70638	45825	3532.9	76302	24852	1	1.6046e-132	3.2091e-132	2.5256e-130	TRUE
s_55054	GALP	36161	70638	36161	70638	45825	3532.9	76302	24852	1	1.6046e-132	3.2091e-132	2.5256e-130	TRUE
s_16386	RPL24	36161	70638	36161	70638	45825	3532.9	76302	24852	1	1.6046e-132	3.2091e-132	2.5256e-130	TRUE
s_19828	UBA7	33166	123.62	33166	123.62	48515	10935	23688	24718	1	4.6071e-131	9.2142e-131	7.2442e-129	TRUE
s_09463	IL9	18241	974.81	18241	974.81	56643	7209100000	1498.3	24713	1	5.7297e-131	1.1459e-130	9.0003e-129	TRUE
s_70527	LHFPL3	2985	109.49	2985	109.49	47932	8552.1	18616	24685	1	1.035e-131	2.0699e-130	1.6241e-128	TRUE
s_35671	PALD1	36483	137.75	36483	137.75	48996	13612	29535	24675	1	1.3397e-130	2.6795e-130	2.1002e-128	TRUE
s_24031	DYRK1B	22885	1289.2	22885	1289.2	57553	12702000000	2640.3	24644	1	3.2129e-130	6.4259e-130	5.0316e-128	TRUE
s_47033	SLC22A23	49749	197.79	49749	197.79	50562	28330	61431	43275	1	8.4663e-130	1.6933e-129	1.3245e-127	TRUE
s_31281	SIRT2	26533	95362	26533	95362	47212	6461.7	14278	24535	1	4.1342e-129	8.2684e-129	6.4613e-127	TRUE
s_56332	OTOP2	43116	166	43116	166	49746	19843	43709	24456	1	2.8904e-128	5.7807e-128	4.5127e-126	TRUE
s_19198	TIE1	99499	455.62	99499	455.62	5382	153900000	332.42	24444	1	4.1433e-128	8.2865e-128	6.4624e-126	TRUE
s_22211	CYP4F2	18573	985.41	18573	985.41	56552	7359300000	1567.2	24423	1	7.2441e-128	1.4488e-127	1.1288e-125	TRUE
s_46146	CALCOCO1	0.99499	35319	0.99499	35319	41863	878.49	19824	24378	1	1.9157e-127	3.8314e-127	2.982e-126	TRUE
s_62073	MFSD4	13266	45915	13266	45915	43337	1481.9	33618	24318	1	8.209e-128	1.6418e-126	1.2727e-124	TRUE
s_51186	SEL1L2	13266	45915	13266	45915	43337	1481.9	33618	24318	1	8.209e-128	1.6418e-126	1.2727e-124	TRUE
s_09896	JAG2	13266	45915	13266	45915	43337	1481.9	33618	24318	1	8.209e-128	1.6418e-126	1.2727e-124	TRUE
s_36825	GPR132	13266	45915	13266	45915	43337	1481.9	33618	24318	1	8.209e-128	1.6418e-126	1.2727e-124	TRUE
s_74525	RHOXF2B	46433	180.13	46433	180.13	50043	23398	52109	24.31	1	1.041e-127	2.082e-127	1.6123e-124	TRUE
s_74794	NBPF8	20563	1109	20563	1109	56859	9343500000	2020.8	24213	1	1.1881e-125	2.3762e-125	1.8383e-123	TRUE
s_56249	CHMP4C	23216	81234	23216	81234	46298	4664.1	10632	24202	1	1.3983e-125	2.7965e-125	2.1613e-123	TRUE
s_24221	MTA2	39468	2497.1	39468	2497.1	59479	48403000000	10341	24167	1	3.801e-126	7.602e-126	5.8695e-123	TRUE
s_23864	USP2	37146	2313.4	37146	2313.4	5923	41459000000	8882.7	24152	1	5.4741e-125	1.0948e-124	8.4447e-123	TRUE
s_47129	ELMO2	37146	2302.8	37146	2302.8	59163	41056000000	8882.7	24039	1	8.2567e-124	1.6513e-123	1.2724e-121	TRUE
s_44593	NMUR2	16583	56511	16583	56511	44353	2242.3	52248	23997	1	1.9353e-123	3.8707e-123	2.9708e-121	TRUE
s_50170	NEK11	16583	56511	16583	56511	44353	2242.3	52248	23997	1	1.9353e-123	3.8707e-123	2.9708e-121	TRUE
s_26221	PSMD6	16583	56511	16583	56511	44353	2242.3	52248	23997	1	1.9353e-123	3.8707e-123	2.9708e-121	TRUE
s_42175	ZNF654	16583	56511	16583	56511	44353	2242.3	52248	23997	1	1.9353e-123	3.8707e-123	2.9708e-121	TRUE
s_62389	FBXO41	39799	148.34	39799	148.34	49063	15756	36196	23995	1	2.1135e-123	4.227e-124	3.2411e-121	TRUE
s_63847	PARP15	33166	120.09	33166	120.09	29677	10268	23688	23992	1	2.2489e-123	4.4978e-123	3.4452e-121	TRUE
s_14094	PLAGL2	20895	1119.6	20895	1119.6	56776	9514300000	2103.2	23958	1	5.6444e-123	1.1289e-122	8.6385e-121	TRUE
s_70346	C19orf35	43116	162.47	43116	162.47	49437	18939	43709	23922	1	1.2098e-122	2.4196e-122	1.8498e-120	TRUE
s_74777	NPIPB6	79599	339.06	79599	339.06	52462	84256	191.98	23897	1	2.3045e-122	4.609e-123	3.5199e-120	TRUE
s_59979	TMEM42	0.66332	24723	0.66332	24723	39509	431.93	10196	23827	1	1.167e-122	2.3341e-121	1.7791e-119	TRUE
s_75148	FAM229A	0.66332	24723	0.66332	24723	39509	431.93	10196	23827	1	1.167e-122	2.3341e-121	1.7791e-119	TRUE
s_49838	LMAN1L	26533	91.83	26533	91.83	46673	5952.2	14278	43274	1	2.53e-123	5.0599e-119	3.8529e-117	TRUE
s_05465	EIF5	36161	67107	36161	67107	45096	3159.5	76302	23573	1	4.7163e-119	9.4326e-119	7.1615e-117	TRUE
s_44522	PNO1	36161	67107	36161	67107	45096	3159.5	76302	23573	1	4.7163e-119	9.4326e-119	7.1615e-117	TRUE
s_43667	LENEP	36161	67107	36161	67107	45096	3159.5	76302	23573	1	4.7163e-119	9.4326e-119	7.1615e-117	TRUE
s_67336	SLC39A5	14593	702.85	14593	702.85	54963	3691500000	859.18	23481	1	4.6497e-118	9.2994e-118	7.0534e-116	TRUE
s_35079	CNNM1	63348	4386.7	63348	4386.7	60914	151090000000	33909	23478	1	5.422e-119	1.0844e-117	8.2169e-116	TRUE
s_64829	FLCN	63016	250.77	63016	250.77	51077	45567	108.58	23.46	1	7.1188e-118	1.4238e-117	1.0778e-115	TRUE
s_72844	TMEM41B	56383	218.98	56383	218.98	50504	34601	82971	23421	1	1.7684e-117	3.5367e-117	2.6747e-115	TRUE
s_00147	ACR	69649	282.55	69649	282.55	51538	58044	138.51	23417	1	2.0028e-117	4.0055e-117	3.0263e-115	TRUE
s_35255	OR4D1	67327	4722.2	67327	4722.2	61111	175360000000	39516	23416	1	2.2999e-117	4.5998e-117	3.4719e-115	TRUE
s_51824	DEFB126	21558	1137.3	21558	1137.3	56571	9795500000	2274	23397	1	3.4172e-117	6.8344e-117	5.1535e-115	TRUE
s_55150	ARHGAP11B	20563	1070.2	20563	1070.2	56345	8656700000	2020.8	23349	1	1.0394e-116	2.0788e-116	1.566e-115	TRUE
s_58237	CYP2R1	66664	4648	66664	4648	61024	169770000000	38545	23335	1	1.5487e-116	3.0975e-116	2.3266e-114	TRUE
s_57408	NT5C3B	46433	173.06	46433	173.06	49469	21454	52109	23331	1	1.4405e-116	2.8811e-116	2.1662e-114	TRUE
s_46859	EXOC4	46433	173.06	46433	173.06	49469	21454	52109	23331	1	1.4405e-116	2.8811e-116	2.1662e-114	TRUE
s_57268	RHPN1	12603	579.24	12603	579.24	54146	2489300000	596.83	23194	1	3.7499e-115	7.4998e-115	5.6278e-113	TRUE
s_38836	LIMA1	28855	1617.6	28855	1617.6	57607	19988000000	4716.4	23134	1	1.5827e-114	3.1654e-114	2.373e-113	TRUE
s_11818	MT1F	23216	77702	23216	77702	45664	4233.5	10632	23119	1	1.9766e-114	3.9531e-114	2.9578e-112	TRUE
s_06184	FCN2	23216	77702	23216	77702	45664	4233.5	10632	23119	1	1.9766e-114	3.9531e-114	2.9578e-112	TRUE
s_64664	C1orf100	10282	448.55	10282	448.55	53165	1480600000	360.46	23084	1	4.7201e-114	9.4403e-114	7.0566e-112	TRUE
s_59229	B3GALT6	22221	1165.5	22221	1165.5	56506	1028000000	2453	23084	1	4.9608e-114	9.9216e-114	7.4093e-112	TRUE
s_49609	SMC6	2985	102.43	2985	102.43	46979	7397.2	18616	23047	1	1.0326e-113	2.0652e-113	1.5393e-111	TRUE
s_28531	DPYSL4	2985	102.43	2985	102.43	46979	7397.2	18616	23047	1	1.0326e-113	2.0652e-113	1.5393e-111	TRUE
s_58825	CCDC43	56383	215.45	56383	215.45	50271	33402	82971	23034	1	1.4663e-113	2.9326e-113	2.1837e-111	TRUE
s_16082	RFXAP	17578	868.85	17578	868.85	55491	5663300000	1366	23033	1	1.6106e-113	3.2211e-113	2.3962e-111	TRUE
s_40192	DDIT4	33498	1939	33498	1939	58134	28846000000	6854.7	23016	1	2.4744e-113	4.9488e-113	3.6779e-111	TRUE
s_71334	GRXCR1	27196	1490.5	27196	1490.5	57251	16916000000	4066.7	22946	1	1.2144e-112	2.4289e-112	1.8034e-110	TRUE
s_36769	UBIAD1	32835	1882.5	32835	1882.5	57988	27154000000	6519.5	22908	1	2.9294e-112	5.8589e-112	4.3459e-110	TRUE
s_62972	ATP6V0E2	99499	427.36	99499	427.36	52898	1340700000	332.42	22894	1	3.7657e-112	7.5315e-112	5.5813e-110	TRUE
s_28834	CELF2	15588	741.7	15588	741.7	54846	4103600000	1012.5	22.82	1	2.1274e-111	4.2549e-111	3.1501e-109	TRUE
s_49796	TEFM	37478	2211	37478	2211	58452	37601000000	9083	22806	1	3.0689e-111	6.1378e-111	4.5398e-109	TRUE
s_50066	CLMP	68986	4732.8	68986	4732.8	60798	175670000000	42006	22755	1	1.0054e-110	2.0108e-110	1.4858e-108	TRUE
s_22611	EIF3D	36483	127.15	36483	127.15	4785	11439	29535	22725	1	1.6984e-110	3.3967e-110	2.5028e-108	TRUE
s_16376	RPL22	36483	127.15	36483	127.15	4785	11439	29535	22725	1	1.6984e-110	3.3967e-110	2.5028e-108	TRUE
s_08732	HOXC9	36483	127.15	36483	127.15	4785	11439	29535	22725	1	1.6984e-110	3.3967e-110	2.5028e-108	TRUE
s_67904	C1orf167	14925	699.32	14925	699.32	54587	3639500000	908.6	22705	1	2.8978e-110	5.7956e-110	4.2663e-108	TRUE
s_08790	HPCAL1	44111	2694.9	44111	2694.9	59011	56121000000	13670	22672	1	6.5462e-110	1.3092e-109	9.6013e-108	TRUE
s_31009	NTNG1	38473	2271	38473	2271	5847	39675000000	9699.9	22668	1	7.061e-111	1.4122e-109	1.0346e-107	TRUE
s_18817	TBX3	26533	88298	26533	88298	46114	5464.5	14278	22665	1	6.4725e-110	1.2945e-109	9.5022e-108	TRUE
s_29859	SNRNP27	26533	88298	26533	88298	46114	5464.5	14278	22665	1	6.4725e-110	1.2945e-109	9.5022e-108	TRUE
s_30513	MRPL3	26533	88298	26533	88298	46114	5464.5	14278	22665	1	6.4725e-110	1.2945e-109	9.5022e-108	TRUE
s_51932	NETO1	59699	226.04	59699	226.04	50257	36716	95253	22549	1	9.3954e-109	1.8791e-108	1.3754e-106	TRUE
s_50097	LONRF3	33166	113.02	33166	113.02	47233	8999	23688	22.54	1	1.107e-109	2.214e-109	1.619e-107	TRUE
s_43030	MREG	34639	526.26	34639	526.26	53486	2041500000	521.92	22513	1	2.2202e-108	4.4403e-108	3.244e-107	TRUE
s_28773	IGF2BP1	30845	1709.5	30845	1709.5	57472	22287000000	5574.1	22483	1	4.5613e-108	9.1226e-108	6.6585e-106	TRUE
s_72867	ZNF705A	36815	2129.8	36815	2129.8	58163	34798000000	8685.2	22458	1	8.226e-109	1.6452e-107	1.1963e-105	TRUE
s_33614	NAT6	16583	52979	16583	52979	43438	1947.6	52248	22452	1	7.9579e-108	1.5916e-107	1.1584e-105	TRUE
s_45182	SALL4	16583	52979	16583	52979	43438	1947.6	52248	22452	1	7.9579e-108	1.5916e-107	1.1584e-105	TRUE
s_16551	RPS11	16583	52979	16583	52979	43438	1947.6	52248	22452	1	7.9579e-108	1.5916e-107	1.1584e-105	TRUE
s_15469	PTPRD	13266	42383	13266	42383	42208	1244.4	33618	22392	1	3.0789e-107	6.1578e-107	4.4734e-105	TRUE
s_57740	LYPD1	15588	727.58	15588	727.58	54569	3937400000	1012.5	22376	1	4.9397e-107	9.8793e-107	7.1702e-105	TRUE
s_51981	ZNF611	38141	2218	38141	2218	58251	3777000000	9491.5	22375	1	5.2429e-107	1.0486e-106	7.6033e-105	TRUE
s_45992	KIAA1456	46433	166	46433	166	48872	19597	52109	22353	1	7.6648e-107	1.533e-107	1.1105e-104	TRUE
s_31816	GPATCH8	54061	3418.9	54061	3418.9	59568	90737000000	22775	22296	1	3.1308e-106	6.2617e-106	4.5108e-104	TRUE
s_07746	GRIK4	36161	63575	36161	63575	44328	2807.7	76302	22295	1	2.7107e-106	5.4215e-106	3.9092e-104	TRUE
s_48901	SMIM7	36161	63575	36161	63575	44328	2807.7	76302	22295	1	2.7107e-106	5.4215e-106	3.9092e-104	TRUE
s_36832	RPA4	36161	63575	36161	63575	44328	2807.7	76302	22295	1	2.7107e-106	5.4215e-106	3.9092e-104	TRUE
s_47207	DMRTC1	36161	63575	36161	63575	44328	2807.7	76302	22295	1	2.7107e-106	5.4215e-106	3.9092e-104	TRUE
s_02018	C7	36161	63575	36161	63575	44328	2807.7	76302	22295	1	2.7107e-106	5.4215e-106	3.9092e-104	TRUE
s_05875	MECOM	13598	611.02	13598	611.02	53897	2760700000	720.8	22252	1	7.7092e-106	1.5418e-105	1.1097e-103	TRUE
s_33731	QPCT	2985	98894	2985	98894	46478	6852.3	18616	22229	1	1.1959e-105	2.3918e-105	1.7198e-103	TRUE
s_50364	MRM1	30845	1688.3	30845	1688.3	57292	2.17e+06	5574.1	43153	1	2.6221e-105	5.2442e-105	3.7673e-103	TRUE
s_03672	COMT	10945	466.21	10945	466.21	52896	1593600000	420.72	22196	1	2.6848e-105	5.3697e-105	3.8539e-103	TRUE
s_70210	NANOGNB	51739	3214.1	51739	3214.1	59298	80004000000	20399	22141	1	9.8893e-105	1.9779e-104	1.4182e-102	TRUE
s_61715	EME1	63016	236.64	63016	236.64	50244	40187	108.58	22105	1	1.962e-105	3.924e-105	2.8111e-102	TRUE
s_36093	TMEM97	21.89	1094.9	21.89	1094.9	55813	9010100000	2362.5	22076	1	4.0131e-104	8.0263e-104	5.7393e-102	TRUE
s_59416	KLHDC7A	36483	123.62	36483	123.62	47447	10758	29535	22075	1	3.6716e-104	7.3431e-104	5.2556e-102	TRUE
s_04067	CSNK1A1	23216	74.17	23216	74.17	45002	3824.6	10632	22035	1	8.6616e-104	1.7323e-103	1.2376e-101	TRUE
s_06700	G6PC	76282	296.68	76282	296.68	51086	63559	172.97	21978	1	3.2537e-103	6.5074e-103	4.6446e-101	TRUE
s_69554	OR2T29	0.33166	14128	0.33166	14128	35059	142.24	0.39404	21978	1	3.3527e-103	6.7054e-103	4.7509e-101	TRUE
s_29277	FAXDC2	0	14128	0.33166	14128	35059	171.1	0.39404	21978	1	3.3527e-103	6.7054e-103	4.7509e-101	TRUE
s_19585	TRIO	0	14128	0.33166	14128	35059	171.1	0.39404	21978	1	3.3527e-103	6.7054e-103	4.7509e-101	TRUE
s_65113	ZNF449	0	14128	0.33166	14128	35059	171.1	0.39404	21978	1	3.3527e-103	6.7054e-103	4.7509e-101	TRUE
s_33209	DDAH1	0	14128	0.33166	14128	35059	171.1	0.39404	21978	1	3.3527e-103	6.7054e-103	4.7509e-101	TRUE
s_55119	GAL3ST3	0	14128	0.33166	14128	35059	171.1	0.39404	21978	1	3.3527e-103	6.7054e-103	4.7509e-101	TRUE
s_00620	ALDH1A3	0	14128	0.33166	14128	35059	171.1	0.39404	21978	1	3.3527e-103	6.7054e-103	4.7509e-101	TRUE
s_69247	VWA2	0.33166	14128	0.33166	14128	35059	142.24	0.39404	21978	1	3.3527e-103	6.7054e-103	4.7509e-101	TRUE
s_61828	ZNF417	40794	2369.9	40794	2369.9	5826	43114000000	11236	21973	1	3.9849e-103	7.9697e-103	5.6415e-101	TRUE
s_68620	KRTAP19-1	0.99499	31787	0.99499	31787	40387	698.05	19824	21.87	1	3.3196e-102	6.6392e-102	4.6954e-100	TRUE
s_62189	CCDC17	86232	342.6	86232	342.6	51581	85068	233.66	21848	1	5.6327e-102	1.1265e-101	7.9599e-100	TRUE
s_02480	CCNA2	33166	109.49	33166	109.49	46779	8397.1	23688	21815	1	1.1164e-101	2.2328e-101	1.5748e-99	TRUE
s_56875	L3HYPDH	33166	109.49	33166	109.49	46779	8397.1	23688	21815	1	1.1164e-101	2.2328e-101	1.5748e-99	TRUE
s_17190	SRSF1	14593	653.41	14593	653.41	53912	3155400000	859.18	21794	1	1.9245e-101	3.8489e-101	2.7121e-99	TRUE
s_64716	CREG2	26533	84766	26533	84766	45531	4998.5	14278	21731	1	6.9237e-101	1.3847e-100	9.7398e-99	TRUE
s_43414	METTL2B	26533	84766	26533	84766	45531	4998.5	14278	21731	1	6.9237e-101	1.3847e-100	9.7398e-99	TRUE
s_27480	MRPS31	34493	1900.2	34493	1900.2	57432	27516000000	7376.5	21723	1	9.5598e-101	1.912e-101	1.3436e-98	TRUE
s_00882	APBA1	11277	473.28	11277	473.28	52718	1638400000	452.99	21707	1	1.2582e-100	2.5163e-100	1.7667e-98	TRUE
s_07903	GSTM4	39799	134.21	39799	134.21	4763	12673	36196	21647	1	4.3904e-100	8.7808e-100	6.1594e-98	TRUE
s_06561	FPR1	49086	2942.1	49086	2942.1	58768	66724000000	17874	21639	1	5.9905e-100	1.1981e-99	8.3966e-98	TRUE
s_76216	KIAA2012	69649	261.36	69649	261.36	50418	49025	138.51	21616	1	8.7913e-100	1.7583e-99	1.23e-101	TRUE
s_01627	BCKDHB	69649	261.36	69649	261.36	50418	49025	138.51	21616	1	8.7913e-100	1.7583e-99	1.23e-101	TRUE
s_00596	ALCAM	79599	307.28	79599	307.28	51046	68100	191.98	21603	1	1.1829e-99	2.3659e-99	1.6536e-97	TRUE
s_38829	NAT8B	92865	370.85	92865	370.85	51759	99771	280.41	21592	1	1.504e-100	3.008e-100	2.1004e-97	TRUE
s_71338	TMPRSS11F	56383	201.32	56383	201.32	49297	28829	82971	21483	1	1.5458e-98	3.0917e-98	2.1569e-96	TRUE
s_12092	MYO1A	36483	120.09	36483	120.09	47032	10099	29535	21425	1	5.2073e-98	1.0415e-97	7.2594e-96	TRUE
s_09941	KCNA1	2985	95362	2985	95362	45958	6329.2	18616	21.41	1	7.0963e-98	1.4193e-97	9.8838e-96	TRUE
s_53509	FAM195A	48423	2857.3	48423	2857.3	58539	62804000000	17274	21372	1	1.9001e-97	3.8003e-97	2.6442e-95	TRUE
s_33057	ACAP2	24543	1222	24543	1222	55814	11217000000	3145.2	21353	1	2.7509e-97	5.5019e-97	3.8247e-95	TRUE
s_45329	SMAGP	89549	349.66	89549	349.66	51385	88363	256.39	21278	1	1.2742e-96	2.5484e-96	1.77e-98	TRUE
s_17767	SMARCD1	71971	4662.1	71971	4662.1	59978	169250000000	46721	21236	1	3.5289e-96	7.0578e-96	4.8975e-94	TRUE
s_43502	PECR	10613	427.36	10613	427.36	5205	1326900000	389.89	21106	1	4.9728e-95	9.9456e-95	6.8953e-93	TRUE
s_07744	GRIK3	59699	211.92	59699	211.92	4933	31914	95253	21102	1	5.2766e-95	1.0553e-94	7.3034e-93	TRUE
s_60257	GPR151	59699	211.92	59699	211.92	4933	31914	95253	21102	1	5.2766e-95	1.0553e-94	7.3034e-93	TRUE
s_71476	SPATA31D1	33166	105.96	33166	105.96	4631	7816.8	23688	21089	1	6.6568e-95	1.3314e-94	9.2055e-93	TRUE
s_16734	S100A6	14925	649.87	14925	649.87	5353	3107900000	908.6	21065	1	1.2182e-94	2.4365e-94	1.6832e-92	TRUE
s_04503	DGKQ	36161	60043	36161	60043	43516	2477.5	76302	21016	1	3.0477e-94	6.0954e-94	4.1884e-92	TRUE
s_17872	SNRPB	36161	60043	36161	60043	43516	2477.5	76302	21016	1	3.0477e-94	6.0954e-94	4.1884e-92	TRUE
s_44988	PNPLA2	36161	60043	36161	60043	43516	2477.5	76302	21016	1	3.0477e-94	6.0954e-94	4.1884e-92	TRUE
s_71721	KDM4E	36161	60043	36161	60043	43516	2477.5	76302	21016	1	3.0477e-94	6.0954e-94	4.1884e-92	TRUE
s_67608	KANSL1	36161	60043	36161	60043	43516	2477.5	76302	21016	1	3.0477e-94	6.0954e-94	4.1884e-92	TRUE
s_55470	KNSTRN	36161	60043	36161	60043	43516	2477.5	76302	21016	1	3.0477e-94	6.0954e-94	4.1884e-92	TRUE
s_02402	RUNX1	31508	1642.3	31508	1642.3	56597	20396000000	5879.3	21008	1	4.1847e-94	8.3695e-94	5.7459e-92	TRUE
s_17067	SDC2	49749	169.53	49749	169.53	4835	20271	61431	20995	1	4.8952e-94	9.7905e-94	6.7096e-92	TRUE
s_41147	TIPIN	49749	169.53	49749	169.53	4835	20271	61431	20995	1	4.8952e-94	9.7905e-94	6.7096e-92	TRUE
s_35633	SMC1B	16583	738.17	16583	738.17	53936	4023900000	1181.3	20995	1	5.3267e-94	1.0653e-93	7.2945e-92	TRUE
s_52041	ABHD17A	25.87	1282.1	25.87	1282.1	55775	12339000000	3588.1	20972	1	8.9229e-94	1.7846e-93	1.2208e-91	TRUE
s_36887	DPP7	59036	3592	59036	3592	59032	99657000000	28408	20961	1	1.1698e-93	2.3396e-93	1.5991e-91	TRUE
s_72831	IFIT1B	23216	70638	23216	70638	44308	3437.3	10632	20952	1	1.1769e-93	2.3538e-93	1.606e-92	TRUE
s_37132	EHD4	23216	70638	23216	70638	44308	3437.3	10632	20952	1	1.1769e-93	2.3538e-93	1.606e-92	TRUE
s_31338	TPX2	16583	49447	16583	49447	42462	1674.5	52248	20907	1	3.0197e-93	6.0394e-93	4.1171e-91	TRUE
s_59481	IQGAP3	12603	522.72	12603	522.72	52668	199500000	596.83	20881	1	5.7305e-93	1.1461e-92	7.8061e-91	TRUE
s_40331	ARL15	46764	2663.1	46764	2663.1	58016	54295000000	15828	20796	1	3.6379e-92	7.2759e-92	4.9425e-90	TRUE
s_40309	NDFIP2	26533	81234	26533	81234	44925	4554.1	14278	20796	1	3.0971e-92	6.1943e-92	4.2115e-90	TRUE
s_40692	BCAS3	26533	81234	26533	81234	44925	4554.1	14278	20796	1	3.0971e-92	6.1943e-92	4.2115e-90	TRUE
s_20392	YWHAB	36483	116.55	36483	116.55	46605	9461.3	29535	20775	1	4.8456e-92	9.6911e-92	6.566e-91	TRUE
s_15727	RAD21	36483	116.55	36483	116.55	46605	9461.3	29535	20775	1	4.8456e-92	9.6911e-92	6.566e-91	TRUE
s_17484	SLC3A2	36483	116.55	36483	116.55	46605	9461.3	29535	20775	1	4.8456e-92	9.6911e-92	6.566e-91	TRUE
s_59861	CPO	82916	310.81	82916	310.81	50686	69334	212.2	20767	1	5.9735e-92	1.1947e-91	8.0872e-90	TRUE
s_39423	RTEL1	43116	141.28	43116	141.28	47434	13972	43709	20717	1	1.6419e-91	3.2837e-91	2.2209e-89	TRUE
s_65067	C9orf72	16251	709.92	16251	709.92	53649	3710800000	1123.3	20697	1	2.6844e-91	5.3688e-91	3.628e-90	TRUE
s_69374	ZNF774	86232	324.94	86232	324.94	50819	75852	233.66	20693	1	2.7959e-91	5.5918e-91	3.7754e-89	TRUE
s_48223	PAPOLG	12935	533.32	12935	533.32	52609	2074800000	636.58	20625	1	1.1723e-90	2.3446e-90	1.5816e-88	TRUE
s_23209	NR1I2	42121	2316.9	42121	2316.9	57483	40903000000	12175	20617	1	1.5006e-90	3.0011e-90	2.0227e-88	TRUE
s_47649	ARHGAP9	2985	91.83	2985	91.83	4542	5827.7	18616	20592	1	2.1576e-90	4.3152e-90	2.9008e-88	TRUE
s_32836	SF3B3	2985	91.83	2985	91.83	4542	5827.7	18616	20592	1	2.1576e-90	4.3152e-90	2.9008e-88	TRUE
s_74545	CT47A8	2985	91.83	2985	91.83	4542	5827.7	18616	20592	1	2.1576e-90	4.3152e-90	2.9008e-88	TRUE
s_44409	FMN2	39799	127.15	39799	127.15	46856	11263	36196	20472	1	2.5413e-89	5.0825e-89	3.4137e-87	TRUE
s_58591	KLHL33	13266	38851	13266	38851	40983	1028.4	33618	20466	1	2.8457e-89	5.6914e-89	3.816e-88	TRUE
s_12574	NFYA	13266	38851	13266	38851	40983	1028.4	33618	20466	1	2.8457e-89	5.6914e-89	3.816e-88	TRUE
s_36209	LAMTOR2	32835	1681.2	32835	1681.2	56357	21318000000	6519.5	20415	1	9.3862e-89	1.8772e-88	1.2576e-86	TRUE
s_72922	SMIM22	16583	716.98	16583	716.98	53517	377900000	1181.3	20378	1	1.8998e-88	3.7997e-88	2.5432e-86	TRUE
s_39862	SOX18	33166	102.43	33166	102.43	45825	7258.1	23688	20363	1	2.347e-89	4.694e-89	3.1391e-86	TRUE
s_36782	C18orf8	21.89	1010.1	21.89	1010.1	54651	7577800000	2362.5	20332	1	4.9955e-88	9.9911e-88	6.6642e-86	TRUE
s_05191	DVL3	0.66332	21192	0.66332	21192	37379	308.59	10196	20.33	1	4.7235e-88	9.447e-89	6.3068e-86	TRUE
s_49177	RSG1	0.66332	21192	0.66332	21192	37379	308.59	10196	20.33	1	4.7235e-88	9.447e-89	6.3068e-86	TRUE
s_47551	ROBO3	56383	190.72	56383	190.72	48521	25628	82971	20319	1	5.9185e-88	1.1837e-87	7.8887e-86	TRUE
s_55297	PHLDB2	22885	1066.6	22885	1066.6	54822	8462300000	2640.3	20313	1	7.3263e-88	1.4653e-87	9.7568e-86	TRUE
s_04461	CYP51A1	21558	988.94	21558	988.94	54556	7256600000	2274	20286	1	1.266e-88	2.532e-88	1.6845e-85	TRUE
s_39420	LUC7L3	22553	1045.4	22553	1045.4	54734	8122700000	2545.6	20274	1	1.6266e-87	3.2531e-87	2.1624e-85	TRUE
s_56331	OTOP2	43116	137.75	43116	137.75	47071	13221	43709	20183	1	9.3586e-87	1.8717e-86	1.2431e-84	TRUE
s_04404	CYP3A5	89549	332	89549	332	5064	78971	256.39	20175	1	1.1373e-86	2.2746e-86	1.5094e-84	TRUE
s_13965	PIK3C3	39799	2112.1	39799	2112.1	56947	3382000000	10561	20165	1	1.519e-87	3.0379e-86	2.0142e-84	TRUE
s_75440	NBPF10	36483	113.02	36483	113.02	46165	8845.5	29535	20125	1	2.9584e-86	5.9169e-86	3.9197e-84	TRUE
s_38578	KRT76	49749	162.47	49749	162.47	47739	18474	61431	20094	1	5.6262e-86	1.1252e-85	7.4478e-84	TRUE
s_56446	TMEM44	67327	4054.6	67327	4054.6	58913	126820000000	39516	20058	1	1.3491e-85	2.6982e-85	1.7844e-83	TRUE
s_05728	NR2F6	11277	437.96	11277	437.96	51601	1385400000	452.99	20047	1	1.514e-86	3.0281e-85	2.0008e-83	TRUE
s_08196	HBM	24875	1162	24875	1162	54902	10047000000	3252.6	19938	1	1.4114e-84	2.8228e-84	1.8636e-82	TRUE
s_36806	GMPPA	23216	67107	23216	67107	43578	3071.5	10632	19869	1	4.9598e-84	9.9196e-84	6.5433e-82	TRUE
s_76109	CORO7-PAM16	14593	596.9	14593	596.9	52609	2595800000	859.18	19866	1	5.8194e-84	1.1639e-83	7.6513e-82	TRUE
s_56385	CCDC102A	26533	77702	26533	77702	44291	4131.2	14278	19861	1	5.7945e-84	1.1589e-83	7.625e-83	TRUE
s_04545	DBI	26533	77702	26533	77702	44291	4131.2	14278	19861	1	5.7945e-84	1.1589e-83	7.625e-83	TRUE
s_57775	CLNK	26533	77702	26533	77702	44291	4131.2	14278	19861	1	5.7945e-84	1.1589e-83	7.625e-83	TRUE
s_20069	KDM6A	69649	240.17	69649	240.17	49203	40794	138.51	19815	1	1.5183e-83	3.0366e-83	1.9946e-81	TRUE
s_44486	UBQLN4	37146	1903.7	37146	1903.7	56419	27339000000	8882.7	19805	1	2.0748e-83	4.1497e-83	2.7233e-81	TRUE
s_16987	CCL11	2985	88298	2985	88298	4486	5347.7	18616	19773	1	3.3617e-83	6.7235e-83	4.405e-82	TRUE
s_18172	SRI	2985	88298	2985	88298	4486	5347.7	18616	19773	1	3.3617e-83	6.7235e-83	4.405e-82	TRUE
s_16894	SCN4A	60031	3461.3	60031	3461.3	5826	91879000000	29626	19761	1	5.0972e-83	1.0194e-82	6.6734e-81	TRUE
s_67239	OR8B4	36161	56511	36161	56511	42656	2168.8	76302	19738	1	6.7053e-83	1.3411e-82	8.7418e-81	TRUE
s_75558	ARHGEF33	36161	56511	36161	56511	42656	2168.8	76302	19738	1	6.7053e-83	1.3411e-82	8.7418e-81	TRUE
s_15147	PSMA2	36161	56511	36161	56511	42656	2168.8	76302	19738	1	6.7053e-83	1.3411e-82	8.7418e-81	TRUE
s_60923	CCM2L	36161	56511	36161	56511	42656	2168.8	76302	19738	1	6.7053e-83	1.3411e-82	8.7418e-81	TRUE
s_44268	KCNQ5	36161	56511	36161	56511	42656	2168.8	76302	19738	1	6.7053e-83	1.3411e-82	8.7418e-81	TRUE
s_14549	PPM1B	59036	3380.1	59036	3380.1	58155	87534000000	28408	19704	1	1.5743e-82	3.1485e-82	2.0507e-80	TRUE
s_02443	CBR1	10613	399.11	10613	399.11	51066	1144200000	389.89	19675	1	2.5056e-82	5.0113e-82	3.2612e-80	TRUE
s_63931	MIER3	77941	4775.2	77941	4775.2	59189	176290000000	57075	19662	1	3.6616e-82	7.3232e-82	4.7617e-80	TRUE
s_41501	FEZF2	49749	158.94	49749	158.94	47424	17608	61431	19644	1	4.4511e-82	8.9022e-82	5.7835e-80	TRUE
s_36056	HTATSF1	13598	540.38	13598	540.38	52128	2117500000	720.8	19621	1	7.3317e-82	1.4663e-81	9.5184e-80	TRUE
s_06302	FGFR2	77609	4732.8	77609	4732.8	59122	173070000000	56467	19.59	1	1.4911e-81	2.9823e-81	1.9343e-79	TRUE
s_11542	MAP3K11	22553	1010.1	22553	1010.1	54239	7543400000	2545.6	19574	1	1.9217e-81	3.8433e-81	2.4906e-79	TRUE
s_12942	NUP98	56383	183.66	56383	183.66	47979	23603	82971	19544	1	3.1759e-81	6.3519e-81	4.1128e-79	TRUE
s_18670	TAF11	30513	1469.3	30513	1469.3	5544	16137000000	5425.1	19534	1	4.2872e-81	8.5743e-81	5.5472e-79	TRUE
s_04507	DAO	106.13	6979.1	106.13	6979.1	60258	380010000000	1239700000	19521	1	5.9345e-81	1.1869e-80	7.6723e-79	TRUE
s_19980	UMOD	28855	1366.9	28855	1366.9	55178	13931000000	4716.4	19483	1	1.1604e-80	2.3207e-80	1.4989e-78	TRUE
s_72382	C5orf63	96182	349.66	96182	349.66	50455	87309	305.74	19447	1	2.1763e-80	4.3527e-80	2.809e-79	TRUE
s_33525	PPIL2	46433	144.81	46433	144.81	46914	14549	52109	19417	1	3.7366e-80	7.4732e-80	4.8187e-78	TRUE
s_35314	STEAP1	51408	2800.8	51408	2800.8	57404	59695000000	20072	19406	1	5.3297e-80	1.0659e-79	6.8676e-78	TRUE
s_28574	COLEC10	16583	45915	16583	45915	41415	1422.9	52248	19362	1	1.0582e-79	2.1164e-79	1.3579e-77	TRUE
s_39912	SSH1	16583	45915	16583	45915	41415	1422.9	52248	19362	1	1.0582e-79	2.1164e-79	1.3579e-77	TRUE
s_63829	C1QL2	16583	45915	16583	45915	41415	1422.9	52248	19362	1	1.0582e-79	2.1164e-79	1.3579e-77	TRUE
s_00161	ACP2	16583	45915	16583	45915	41415	1422.9	52248	19362	1	1.0582e-79	2.1164e-79	1.3579e-77	TRUE
s_71835	OR4F15	16583	45915	16583	45915	41415	1422.9	52248	19362	1	1.0582e-79	2.1164e-79	1.3579e-77	TRUE
s_37042	NXPH1	28523	1338.6	28523	1338.6	55038	13343000000	4581.8	19354	1	1.4128e-79	2.8257e-79	1.8114e-77	TRUE
s_29119	ZMYND11	53066	2899.7	53066	2899.7	57455	64011000000	21737	19308	1	3.617e-80	7.234e-80	4.6337e-77	TRUE
s_26108	RGP1	39799	120.09	39799	120.09	46038	9938.5	36196	19298	1	3.7181e-79	7.4362e-79	4.7553e-77	TRUE
s_69485	AADACL4	39799	120.09	39799	120.09	46038	9938.5	36196	19298	1	3.7181e-79	7.4362e-79	4.7553e-77	TRUE
s_39451	ATP8A2	89549	317.87	89549	317.87	50014	71852	256.39	19293	1	4.3345e-79	8.669e-80	5.5391e-77	TRUE
s_43796	NSFL1C	92865	332	92865	332	50167	78481	280.41	19272	1	6.5139e-79	1.3028e-78	8.3173e-77	TRUE
s_03665	COMP	24211	1084.3	24211	1084.3	54279	869200000	3039.9	19227	1	1.6438e-78	3.2876e-78	2.0972e-76	TRUE
s_11657	MNDA	38141	1910.8	38141	1910.8	56101	27453000000	9491.5	19221	1	1.8801e-78	3.7602e-78	2.3967e-76	TRUE
s_59504	DRAM2	27.86	1289.2	27.86	1289.2	54823	12349000000	4319.6	19191	1	3.3238e-78	6.6477e-78	4.2336e-76	TRUE
s_42683	CNOT11	87559	5386.2	87559	5386.2	59268	224410000000	76453	19163	1	6.0253e-78	1.2051e-77	7.6555e-76	TRUE
s_68775	OR5F1	56383	180.13	56383	180.13	47701	22623	82971	19156	1	5.875e-79	1.175e-78	7.4707e-76	TRUE
s_41359	HEATR3	56383	180.13	56383	180.13	47701	22623	82971	19156	1	5.875e-79	1.175e-78	7.4707e-76	TRUE
s_66527	LCE5A	43116	130.68	43116	130.68	46318	11782	43709	19114	1	1.2943e-77	2.5886e-77	1.6418e-75	TRUE
s_25847	FAM65B	43116	130.68	43116	130.68	46318	11782	43709	19114	1	1.2943e-77	2.5886e-77	1.6418e-75	TRUE
s_74211	HNRNPCL3	14261	558.04	14261	558.04	5195	2252500000	811.42	43362	1	2.215e-78	4.43e-81	2.8074e-75	TRUE
s_02677	ENTPD1	82916	286.09	82916	286.09	49494	57904	212.2	43300	1	3.1266e-77	6.2531e-77	3.9595e-75	TRUE
s_29656	TOMM34	32171	1532.9	32171	1532.9	55311	17537000000	6194.4	19067	1	3.5836e-77	7.1672e-77	4.5346e-75	TRUE
s_75588	USP17L11	79599	271.96	79599	271.96	49291	52232	191.98	19054	1	4.2814e-77	8.5628e-77	5.4132e-75	TRUE
s_10947	MXD1	29.85	1391.6	29.85	1391.6	54964	14406000000	5134.4	19004	1	1.1955e-76	2.391e-77	1.5103e-74	TRUE
s_75794	MTRNR2L6	2985	84766	2985	84766	44278	4889.2	18616	18954	1	2.6846e-76	5.3691e-76	3.3859e-74	TRUE
s_56937	SAAL1	2985	84766	2985	84766	44278	4889.2	18616	18954	1	2.6846e-76	5.3691e-76	3.3859e-74	TRUE
s_17151	SEPP1	59699	190.72	59699	190.72	47817	25365	95253	18.93	1	4.4067e-76	8.8133e-76	5.5534e-74	TRUE
s_02215	CALCA	46433	141.28	46433	141.28	4656	13783	52109	18928	1	4.5443e-76	9.0886e-76	5.7083e-74	TRUE
s_75059	LOC730183	26533	74.17	26533	74.17	43629	3729.8	14278	18927	1	4.5351e-76	9.0703e-76	5.7014e-74	TRUE
s_04250	CTSG	26533	74.17	26533	74.17	43629	3729.8	14278	18927	1	4.5351e-76	9.0703e-76	5.7014e-74	TRUE
s_46218	VAT1L	26533	74.17	26533	74.17	43629	3729.8	14278	18927	1	4.5351e-76	9.0703e-76	5.7014e-74	TRUE
s_65743	FAM26D	33166	95362	33166	95362	44805	6205.5	23688	18912	1	6.0333e-76	1.2067e-75	7.5663e-74	TRUE
s_36139	CECR6	33166	95362	33166	95362	44805	6205.5	23688	18912	1	6.0333e-76	1.2067e-75	7.5663e-74	TRUE
s_27733	TNIP1	32171	1518.7	32171	1518.7	55177	17191000000	6194.4	18888	1	1.091e-76	2.1821e-75	1.3672e-73	TRUE
s_38932	TMEM14C	36483	105.96	36483	105.96	45242	7678.7	29535	18826	1	3.1159e-75	6.2318e-75	3.9013e-73	TRUE
s_51845	TSSK3	34825	1670.6	34825	1670.6	55441	20852000000	7555.6	18819	1	4.0499e-75	8.0999e-75	5.0667e-73	TRUE
s_22248	BARX2	23216	63575	23216	63575	4281	2727.2	10632	18786	1	6.4846e-75	1.2969e-74	8.093e-74	TRUE
s_40873	BCOR	23216	63575	23216	63575	4281	2727.2	10632	18786	1	6.4846e-75	1.2969e-74	8.093e-74	TRUE
s_63486	ITPRIPL2	23216	63575	23216	63575	4281	2727.2	10632	18786	1	6.4846e-75	1.2969e-74	8.093e-74	TRUE
s_47315	PBLD	20231	847.66	20231	847.66	53209	5256500000	1940.3	18784	1	7.4907e-75	1.4981e-74	9.3411e-73	TRUE
s_61101	ITLN2	21558	914.77	21558	914.77	53433	6134200000	2274	18731	1	2.063e-75	4.1259e-74	2.5705e-72	TRUE
s_26260	SEC24D	29518	1352.7	29518	1352.7	54711	13577000000	4992.7	18727	1	2.2681e-74	4.5363e-74	2.8239e-72	TRUE
s_64990	GAPT	39799	116.55	39799	116.55	4561	9308.7	36196	18711	1	2.6855e-74	5.371e-75	3.3409e-72	TRUE
s_40539	DIRAS2	16251	642.81	16251	642.81	52218	2994400000	1123.3	18695	1	3.98e-78	7.96e-78	4.9473e-72	TRUE
s_20403	YWHAH	41789	2083.8	41789	2083.8	56065	3263000000	11936	18691	1	4.4802e-74	8.9603e-74	5.5645e-72	TRUE
s_50660	GPR157	82584	4877.6	82584	4877.6	58671	183050000000	66005	18664	1	7.7772e-74	1.5554e-73	9.6441e-72	TRUE
s_35169	ITGB1BP2	15256	593.36	15256	593.36	51923	2544200000	959.7	18661	1	7.4273e-74	1.4855e-73	9.2176e-72	TRUE
s_63681	LPPR5	39468	1935.5	39468	1935.5	55805	2808000000	10341	18645	1	1.0709e-73	2.1417e-73	1.3269e-71	TRUE
s_71487	C9orf171	89549	307.28	89549	307.28	49527	66742	256.39	18631	1	1.2631e-73	2.5263e-73	1.5638e-71	TRUE
s_60246	TMEM174	10613	377.92	10613	377.92	5028	1016300000	389.89	18602	1	2.2056e-73	4.4112e-73	2.7285e-71	TRUE
s_17285	SH3GL1	21226	890.04	21226	890.04	53252	5796100000	2187.6	18576	1	3.7468e-73	7.4935e-73	4.6313e-71	TRUE
s_44302	INPP5E	59699	187.19	59699	187.19	47549	24350	95253	18568	1	3.9736e-73	7.9472e-73	4.9078e-71	TRUE
s_64587	ZNF626	53066	162.47	53066	162.47	4696	18256	71707	18.56	1	4.6509e-73	9.3018e-73	5.7352e-71	TRUE
s_29809	SLC27A2	53066	162.47	53066	162.47	4696	18256	71707	18.56	1	4.6509e-73	9.3018e-73	5.7352e-71	TRUE
s_68903	CPLX4	13266	35319	13266	35319	39644	833.78	33618	18539	1	6.4907e-73	1.2981e-72	7.9849e-71	TRUE
s_50977	CXorf21	13266	35319	13266	35319	39644	833.78	33618	18539	1	6.4907e-73	1.2981e-72	7.9849e-71	TRUE
s_41923	SBNO1	13266	35319	13266	35319	39644	833.78	33618	18539	1	6.4907e-73	1.2981e-72	7.9849e-71	TRUE
s_18189	SRM	66332	211.92	66332	211.92	48018	31321	122.99	18.51	1	1.1771e-72	2.3542e-72	1.4469e-70	TRUE
s_25472	CTR9	76282	250.77	76282	250.77	48669	44099	172.97	18487	1	1.8322e-72	3.6643e-72	2.2503e-70	TRUE
s_34328	ZZZ3	36161	52979	36161	52979	41742	1881.5	76302	18459	1	2.8883e-72	5.7766e-72	3.5447e-70	TRUE
s_72793	C8orf82	10613	374.38	10613	374.38	50145	99580	389.89	18423	1	6.1065e-72	1.2213e-71	7.4884e-70	TRUE
s_19286	TLR4	14925	568.64	14925	568.64	51607	2328500000	908.6	18.37	1	1.6671e-71	3.3342e-71	2.0428e-69	TRUE
s_69677	HSD17B13	13266	490.94	13266	490.94	51078	1726900000	677.9	18346	1	2.5481e-71	5.0962e-71	3.1198e-69	TRUE
s_24802	CDY2A	49749	148.34	49749	148.34	46435	15140	61431	18292	1	6.5385e-71	1.3077e-70	7.9992e-69	TRUE
s_41827	FAIM	28523	1264.4	28523	1264.4	54216	11802000000	4581.8	18259	1	1.3331e-70	2.6662e-70	1.6296e-68	TRUE
s_39885	SLC38A2	16583	642.81	16583	642.81	51944	2984400000	1181.3	18.22	1	2.5982e-70	5.1964e-70	3.1736e-68	TRUE
s_41516	KIF26B	15256	579.24	15256	579.24	51576	2414700000	959.7	18205	1	3.4066e-70	6.8133e-70	4.1578e-68	TRUE
s_13481	PDC	26201	1133.7	26201	1133.7	53826	9452500000	3704.4	18197	1	4.0728e-70	8.1456e-70	4.9669e-68	TRUE
s_53806	MAP1LC3A	36483	102.43	36483	102.43	44758	7127.5	29535	18176	1	5.3758e-70	1.0752e-69	6.5457e-68	TRUE
s_15442	PTPN11	36483	102.43	36483	102.43	44758	7127.5	29535	18176	1	5.3758e-70	1.0752e-69	6.5457e-68	TRUE
s_60880	BPIFA2	86232	286.09	86232	286.09	48988	57501	233.66	18152	1	8.7474e-70	1.7495e-69	1.0643e-67	TRUE
s_47841	GPR135	53066	158.94	53066	158.94	46645	17398	71707	18142	1	1.0033e-69	2.0067e-69	1.2188e-67	TRUE
s_55851	RNF185	53066	158.94	53066	158.94	46645	17398	71707	18142	1	1.0033e-69	2.0067e-69	1.2188e-67	TRUE
s_10895	LY75	2985	81234	2985	81234	43671	4452.2	18616	18136	1	1.0989e-69	2.1978e-69	1.3339e-67	TRUE
s_13127	OSBP	39799	113.02	39799	113.02	4517	8700.5	36196	18124	1	1.3756e-69	2.7511e-69	1.6671e-67	TRUE
s_05314	EEF1B2	39799	113.02	39799	113.02	4517	8700.5	36196	18124	1	1.3756e-69	2.7511e-69	1.6671e-67	TRUE
s_56174	ZNF461	45769	2264	45769	2264	55978	3847000000	14996	18114	1	1.9165e-69	3.8331e-69	2.3208e-67	TRUE
s_05960	F5	29518	1306.8	29518	1306.8	54214	12604000000	4992.7	18077	1	3.6648e-69	7.3296e-69	4.4344e-67	TRUE
s_12986	OCA2	43116	123.62	43116	123.62	45522	10430	43709	18046	1	5.7335e-69	1.1467e-68	6.9323e-67	TRUE
s_66310	LCLAT1	63016	194.26	63016	194.26	4741	26141	108.58	18037	1	6.8295e-69	1.3659e-68	8.2509e-67	TRUE
s_01545	AZU1	79599	257.83	79599	257.83	48524	46495	191.98	18034	1	7.3607e-69	1.4721e-68	8.8858e-67	TRUE
s_76718	Non-TargetingControl	79267	4474.9	79267	4474.9	58012	153140000000	59546	18014	1	1.2167e-68	2.4334e-68	1.4676e-66	TRUE
s_05896	EWSR1	23.88	999.53	23.88	999.53	53297	7308200000	2936.8	18004	1	1.3636e-68	2.7272e-68	1.6436e-66	TRUE
s_10386	KRT32	56383	169.53	56383	169.53	46831	19812	82971	17993	1	1.5126e-68	3.0252e-68	1.8133e-66	TRUE
s_25595	KDM4A	56383	169.53	56383	169.53	46831	19812	82971	17993	1	1.5126e-68	3.0252e-68	1.8133e-66	TRUE
s_23670	SPAG9	26533	70638	26533	70638	42935	3349.8	14278	17992	1	1.4852e-68	2.9703e-68	1.7831e-66	TRUE
s_02471	CCKBR	26533	70638	26533	70638	42935	3349.8	14278	17992	1	1.4852e-68	2.9703e-68	1.7831e-66	TRUE
s_04654	DHX8	26533	70638	26533	70638	42935	3349.8	14278	17992	1	1.4852e-68	2.9703e-68	1.7831e-66	TRUE
s_21753	HIST1H4C	26533	70638	26533	70638	42935	3349.8	14278	17992	1	1.4852e-68	2.9703e-68	1.7831e-66	TRUE
s_04010	CSF1	26533	70638	26533	70638	42935	3349.8	14278	17992	1	1.4852e-68	2.9703e-68	1.7831e-66	TRUE
s_00749	AMPH	38805	1829.5	38805	1829.5	55232	24944000000	9911	17988	1	1.8702e-68	3.7404e-68	2.2402e-66	TRUE
s_27471	DCAF7	46764	2306.3	46764	2306.3	55942	39907000000	15828	17961	1	3.0715e-68	6.1431e-68	3.6764e-66	TRUE
s_74630	KRTAP19-8	31.84	1423.4	31.84	1423.4	54387	14975000000	6035.6	17911	1	7.2848e-68	1.457e-68	8.7127e-66	TRUE
s_64923	PDE12	82916	268.43	82916	268.43	48578	50393	212.2	17858	1	1.7565e-67	3.5129e-67	2.0991e-65	TRUE
s_05195	DYRK1A	70976	3860.4	70976	3860.4	57455	113380000000	45116	17841	1	2.7148e-67	5.4297e-67	3.2419e-65	TRUE
s_34924	TINF2	16583	42383	16583	42383	40286	1192.6	52248	17817	1	3.4277e-67	6.8553e-67	4.0837e-65	TRUE
s_20378	XRCC5	16583	42383	16583	42383	40286	1192.6	52248	17817	1	3.4277e-67	6.8553e-67	4.0837e-65	TRUE
s_52497	ARMC10	16583	42383	16583	42383	40286	1192.6	52248	17817	1	3.4277e-67	6.8553e-67	4.0837e-65	TRUE
s_40959	CYP2W1	48091	2366.4	48091	2366.4	55917	41998000000	16979	17792	1	6.3579e-67	1.2716e-66	7.5689e-65	TRUE
s_21508	USP9Y	48423	2384	48423	2384	55927	42631000000	17274	17771	1	9.2409e-67	1.8482e-66	1.0993e-64	TRUE
s_72281	FAM177B	53066	155.4	53066	155.4	46323	16561	71707	17725	1	1.8198e-66	3.6397e-66	2.1598e-64	TRUE
s_07307	GNAI1	53066	155.4	53066	155.4	46323	16561	71707	17725	1	1.8198e-66	3.6397e-66	2.1598e-64	TRUE
s_62939	C7orf77	53066	155.4	53066	155.4	46323	16561	71707	17725	1	1.8198e-66	3.6397e-66	2.1598e-64	TRUE
s_23179	KSR1	25206	1052.5	25206	1052.5	53291	8100500000	3362.3	17717	1	2.3287e-66	4.6575e-66	2.7617e-64	TRUE
s_34701	MTG2	23216	60043	23216	60043	41999	2404.2	10632	17703	1	2.6311e-66	5.2623e-66	3.1108e-64	TRUE
s_73684	MROH6	23216	60043	23216	60043	41999	2404.2	10632	17703	1	2.6311e-66	5.2623e-66	3.1108e-64	TRUE
s_16313	RPL6	23216	60043	23216	60043	41999	2404.2	10632	17703	1	2.6311e-66	5.2623e-66	3.1108e-64	TRUE
s_06610	FTH1	23216	60043	23216	60043	41999	2404.2	10632	17703	1	2.6311e-66	5.2623e-66	3.1108e-64	TRUE
s_58872	C17orf49	25538	1066.6	25538	1066.6	53302	8319900000	3474.1	17663	1	6.0109e-66	1.2022e-65	7.1013e-64	TRUE
s_55250	RHOT2	16583	621.62	16583	621.62	51461	2775200000	1181.3	17604	1	1.6824e-65	3.3649e-65	1.9861e-63	TRUE
s_37621	ST8SIA3	40463	1886	40463	1886	55082	26464000000	11008	17591	1	2.2311e-65	4.4622e-65	2.6318e-63	TRUE
s_20492	ZNF708	66332	201.32	66332	201.32	47282	27996	122.99	17555	1	3.7669e-65	7.5338e-65	4.4401e-63	TRUE
s_27055	HIPK3	39799	109.49	39799	109.49	44716	8113.6	36196	17537	1	4.9971e-65	9.9941e-65	5.8722e-63	TRUE
s_75891	LOC100506388	39799	109.49	39799	109.49	44716	8113.6	36196	17537	1	4.9971e-65	9.9941e-65	5.8722e-63	TRUE
s_03801	CPM	39799	109.49	39799	109.49	44716	8113.6	36196	17537	1	4.9971e-65	9.9941e-65	5.8722e-63	TRUE
s_12691	NOP2	39799	109.49	39799	109.49	44716	8113.6	36196	17537	1	4.9971e-65	9.9941e-65	5.8722e-63	TRUE
s_53765	ACSS1	45769	2193.3	45769	2193.3	55521	35939000000	14996	17537	1	5.7821e-65	1.1564e-64	6.7896e-63	TRUE
s_07173	GJB5	32503	1430.4	32503	1430.4	5417	15088000000	6355.7	17535	1	5.8962e-65	1.1792e-64	6.9183e-63	TRUE
s_15650	RAB3B	36483	98894	36483	98894	44256	6597.7	29535	17526	1	6.0873e-65	1.2175e-64	7.1371e-63	TRUE
s_33787	TNFAIP8	43116	120.09	43116	120.09	45107	9786.4	43709	17512	1	7.8749e-65	1.575e-65	9.219e-64	TRUE
s_61894	IGFL2	43116	120.09	43116	120.09	45107	9786.4	43709	17512	1	7.8749e-65	1.575e-65	9.219e-64	TRUE
s_74019	TMEM191C	101.49	5926.6	101.49	5926.6	58539	269850000000	1107900000	17501	1	1.1382e-64	2.2763e-64	1.3304e-62	TRUE
s_43792	NDUFA12	26201	1091.4	26201	1091.4	53276	8706300000	3704.4	17501	1	1.0587e-64	2.1173e-64	1.2384e-62	TRUE
s_05444	EIF4B	46433	130.68	46433	130.68	45444	11616	52109	17.46	1	1.9517e-64	3.9034e-64	2.278e-63	TRUE
s_51889	PPP1R14C	46433	130.68	46433	130.68	45444	11616	52109	17.46	1	1.9517e-64	3.9034e-64	2.278e-63	TRUE
s_36022	TOX3	36483	1642.3	36483	1642.3	54543	1996000000	8490.3	17428	1	3.8722e-64	7.7445e-64	4.5161e-62	TRUE
s_07001	NR6A1	23.88	967.75	23.88	967.75	52831	6815200000	2936.8	17417	1	4.5764e-64	9.1528e-64	5.3333e-62	TRUE
s_65880	ZSCAN25	46764	2235.7	46764	2235.7	55493	37328000000	15828	17399	1	6.4904e-64	1.2981e-63	7.5583e-62	TRUE
s_52923	ZIC4	49749	141.28	49749	141.28	45736	13602	61431	17.39	1	6.6141e-64	1.3228e-63	7.685e-63	TRUE
s_75802	MTRNR2L9	49749	141.28	49749	141.28	45736	13602	61431	17.39	1	6.6141e-64	1.3228e-63	7.685e-63	TRUE
s_71386	GFRAL	49749	141.28	49749	141.28	45736	13602	61431	17.39	1	6.6141e-64	1.3228e-63	7.685e-63	TRUE
s_09000	NDST1	79267	4312.5	79267	4312.5	57479	14150000000	59546	17348	1	1.6361e-63	3.2722e-63	1.8995e-61	TRUE
s_61379	LACC1	2985	77702	2985	77702	43038	4036.5	18616	17317	1	2.3062e-63	4.6124e-63	2.6696e-61	TRUE
s_67084	RGL4	2985	77702	2985	77702	43038	4036.5	18616	17317	1	2.3062e-63	4.6124e-63	2.6696e-61	TRUE
s_44389	C21orf59	2985	77702	2985	77702	43038	4036.5	18616	17317	1	2.3062e-63	4.6124e-63	2.6696e-61	TRUE
s_52618	FGFBP2	2985	77702	2985	77702	43038	4036.5	18616	17317	1	2.3062e-63	4.6124e-63	2.6696e-61	TRUE
s_24013	SYNGR1	14925	536.85	14925	536.85	50779	2055200000	908.6	17315	1	2.6244e-63	5.2488e-63	3.0357e-61	TRUE
s_48560	DLK2	57709	2885.6	57709	2885.6	56196	62597000000	26833	17263	1	6.9503e-63	1.3901e-62	8.0334e-61	TRUE
s_45401	TMEM27	27528	1144.3	27528	1144.3	53273	9569200000	4192	17249	1	8.5202e-63	1.704e-63	9.8407e-61	TRUE
s_24404	TAAR2	56383	162.47	56383	162.47	46221	18046	82971	17217	1	1.3429e-62	2.6857e-62	1.5498e-60	TRUE
s_23910	INA	21226	826.47	21226	826.47	52184	4937800000	2187.6	17216	1	1.4816e-62	2.9632e-62	1.7087e-60	TRUE
s_29165	SLC17A3	36161	49447	36161	49447	40766	1615.5	76302	17.18	1	2.4372e-62	4.8744e-62	2.7982e-60	TRUE
s_02780	CDK1	36161	49447	36161	49447	40766	1615.5	76302	17.18	1	2.4372e-62	4.8744e-62	2.7982e-60	TRUE
s_29568	DBF4	36161	49447	36161	49447	40766	1615.5	76302	17.18	1	2.4372e-62	4.8744e-62	2.7982e-60	TRUE
s_67382	C12orf40	36161	49447	36161	49447	40766	1615.5	76302	17.18	1	2.4372e-62	4.8744e-62	2.7982e-60	TRUE
s_16547	RPS10	36161	49447	36161	49447	40766	1615.5	76302	17.18	1	2.4372e-62	4.8744e-62	2.7982e-60	TRUE
s_15939	RBP2	36161	49447	36161	49447	40766	1615.5	76302	17.18	1	2.4372e-62	4.8744e-62	2.7982e-60	TRUE
s_71499	LRRC26	15256	547.45	15256	547.45	50763	2136300000	959.7	17179	1	2.7635e-62	5.5269e-62	3.1704e-60	TRUE
s_13234	FURIN	92865	296.68	92865	296.68	48549	61420	280.41	17163	1	3.5572e-62	7.1143e-62	4.075e-61	TRUE
s_21453	USP11	92865	296.68	92865	296.68	48549	61420	280.41	17163	1	3.5572e-62	7.1143e-62	4.075e-61	TRUE
s_14250	PNOC	18241	681.66	18241	681.66	51489	3335700000	1498.3	17139	1	5.5475e-62	1.1095e-61	6.3504e-60	TRUE
s_28338	FBLN5	29186	1222	29186	1222	53404	10926000000	4853.4	17122	1	7.6135e-62	1.5227e-61	8.7089e-60	TRUE
s_17619	SLC12A2	34639	402.64	34639	402.64	49632	1142800000	521.92	17102	1	1.028e-62	2.056e-62	1.175e-60	TRUE
s_45334	SNX14	26533	67107	26533	67107	42205	2991.1	14278	17057	1	2.0355e-61	4.0711e-61	2.313e-60	TRUE
s_17600	SLC9A5	26533	67107	26533	67107	42205	2991.1	14278	17057	1	2.0355e-61	4.0711e-61	2.313e-60	TRUE
s_36200	REM1	26533	67107	26533	67107	42205	2991.1	14278	17057	1	2.0355e-61	4.0711e-61	2.313e-60	TRUE
s_26353	SV2B	26533	67107	26533	67107	42205	2991.1	14278	17057	1	2.0355e-61	4.0711e-61	2.313e-60	TRUE
s_69760	MOGAT3	26533	67107	26533	67107	42205	2991.1	14278	17057	1	2.0355e-61	4.0711e-61	2.313e-60	TRUE
s_10269	KPNB1	26533	67107	26533	67107	42205	2991.1	14278	17057	1	2.0355e-61	4.0711e-61	2.313e-60	TRUE
s_65517	MS4A15	26533	67107	26533	67107	42205	2991.1	14278	17057	1	2.0355e-61	4.0711e-61	2.313e-60	TRUE
s_15339	PTGER4	26533	67107	26533	67107	42205	2991.1	14278	17057	1	2.0355e-61	4.0711e-61	2.313e-60	TRUE
s_67305	OTOGL	72966	218.98	72966	218.98	47287	33058	155.16	16994	1	6.3085e-61	1.2617e-60	7.1633e-59	TRUE
s_00913	APEX1	43116	116.55	43116	116.55	4468	9163.9	43709	16977	1	8.1379e-61	1.6276e-60	9.2203e-59	TRUE
s_17154	SEPW1	43116	116.55	43116	116.55	4468	9163.9	43709	16977	1	8.1379e-61	1.6276e-60	9.2203e-59	TRUE
s_70471	AQP12A	43116	116.55	43116	116.55	4468	9163.9	43709	16977	1	8.1379e-61	1.6276e-60	9.2203e-59	TRUE
s_20277	WNT7A	18241	674.6	18241	674.6	51339	3261100000	1498.3	16957	1	1.2585e-60	2.5171e-60	1.4249e-58	TRUE
s_65935	CCZ1B	31176	1313.9	31176	1313.9	53528	12643000000	5725.4	16952	1	1.4103e-60	2.8206e-60	1.5932e-58	TRUE
s_62090	CCDC27	92865	293.15	92865	293.15	48377	59833	280.41	16952	1	1.3149e-60	2.6298e-60	1.4866e-58	TRUE
s_51964	KRTAP1-3	39799	105.96	39799	105.96	44248	7548.2	36196	16.95	1	1.2875e-60	2.575e-61	1.4566e-58	TRUE
s_71029	LOC388436	49749	137.75	49749	137.75	45374	12866	61431	16.94	1	1.5528e-60	3.1055e-60	1.7529e-58	TRUE
s_34665	ZNF658	66332	194.26	66332	194.26	46769	25888	122.99	16918	1	2.2903e-60	4.5805e-60	2.5835e-58	TRUE
s_04313	CYBB	16583	596.9	16583	596.9	50876	2541100000	1181.3	16884	1	4.2763e-60	8.5526e-60	4.8204e-58	TRUE
s_22168	ITGA8	36483	95362	36483	95362	43737	6089.3	29535	16876	1	4.5244e-60	9.0488e-60	5.0889e-58	TRUE
s_53570	CYSTM1	36483	95362	36483	95362	43737	6089.3	29535	16876	1	4.5244e-60	9.0488e-60	5.0889e-58	TRUE
s_44616	FEM1C	36483	95362	36483	95362	43737	6089.3	29535	16876	1	4.5244e-60	9.0488e-60	5.0889e-58	TRUE
s_28635	SH2B2	76282	229.58	76282	229.58	27120	36356	172.97	16876	1	4.7329e-60	9.4659e-60	5.3196e-58	TRUE
s_71376	CLPSL2	0.99499	24723	0.99499	24723	36886	401.51	19824	16853	1	6.5883e-60	1.3177e-59	7.3996e-58	TRUE
s_10648	LIG3	0.66332	17.66	0.66332	17.66	34878	206.7	10196	16832	1	9.5722e-60	1.9144e-59	1.0735e-57	TRUE
s_68863	METTL2A	0.66332	17.66	0.66332	17.66	34878	206.7	10196	16832	1	9.5722e-60	1.9144e-59	1.0735e-57	TRUE
s_16142	RHO	96182	303.75	96182	303.75	4843	64244	305.74	16821	1	1.2041e-59	2.4082e-59	1.3494e-57	TRUE
s_69318	ACSM4	79599	240.17	79599	240.17	47504	39812	191.98	16759	1	3.3735e-59	6.747e-60	3.778e-58	TRUE
s_76591	Non-TargetingControl	80262	4227.7	80262	4227.7	57015	135380000000	61442	16732	1	6.1061e-59	1.2212e-58	6.8332e-57	TRUE
s_19179	THY1	72966	215.45	72966	215.45	47054	31900	155.16	16.71	1	7.6278e-59	1.5256e-58	8.53e-61	TRUE
s_06862	GAMT	55056	2627.8	55056	2627.8	55514	51556000000	23842	16662	1	1.9503e-58	3.9007e-58	2.1795e-56	TRUE
s_55236	UBE3B	23216	56511	23216	56511	41139	2102.5	10632	16619	1	3.3146e-58	6.6292e-58	3.696e-57	TRUE
s_66801	GLIPR1L1	23216	56511	23216	56511	41139	2102.5	10632	16619	1	3.3146e-58	6.6292e-58	3.696e-57	TRUE
s_20241	WEE1	23216	56511	23216	56511	41139	2102.5	10632	16619	1	3.3146e-58	6.6292e-58	3.696e-57	TRUE
s_30412	INMT	13266	31787	13266	31787	38168	660.43	33618	16613	1	3.6605e-58	7.321e-59	4.0758e-56	TRUE
s_51632	SGPP1	13266	31787	13266	31787	38168	660.43	33618	16613	1	3.6605e-58	7.321e-59	4.0758e-56	TRUE
s_11326	MEF2D	36151	1547	36151	1547	53808	1757000000	8298.1	16585	1	6.7905e-58	1.3581e-57	7.5555e-56	TRUE
s_45661	AARS2	12935	430.89	12935	430.89	49539	130600000	636.58	16566	1	8.8786e-58	1.7757e-57	9.8718e-56	TRUE
s_43708	ZC4H2	26533	1049	26533	1049	52531	7975400000	3822.9	16537	1	1.5008e-57	3.0017e-57	1.6675e-55	TRUE
s_08536	HMX1	2985	74.17	2985	74.17	42375	3642	18616	16499	1	2.4818e-57	4.9636e-57	2.7554e-55	TRUE
s_69935	SKA2	49749	134.21	49749	134.21	45002	12151	61431	16489	1	2.9775e-57	5.955e-58	3.3034e-55	TRUE
s_16589	RPS20	46433	123.62	46433	123.62	44648	10278	52109	16481	1	3.3692e-57	6.7385e-57	3.7327e-55	TRUE
s_20790	ZKSCAN8	46433	123.62	46433	123.62	44648	10278	52109	16481	1	3.3692e-57	6.7385e-57	3.7327e-55	TRUE
s_49519	RHBDF2	43116	113.02	43116	113.02	4424	8562.8	43709	16443	1	6.3279e-57	1.2656e-56	7.0056e-55	TRUE
s_70117	SLCO4C1	72966	211.92	72966	211.92	46816	30764	155.16	16427	1	8.5129e-57	1.7026e-56	9.4178e-55	TRUE
s_64267	SYNPO2	89549	271.96	89549	271.96	47771	51119	256.39	16425	1	8.8538e-57	1.7708e-56	9.7879e-55	TRUE
s_54436	ZNF341	18573	667.53	18573	667.53	50941	3177600000	1567.2	16393	1	1.578e-57	3.156e-57	1.7433e-54	TRUE
s_62492	GPBAR1	14925	508.6	14925	508.6	5	1827100000	908.6	16378	1	2.0007e-56	4.0014e-56	2.2086e-54	TRUE
s_69404	SMTNL2	48423	2200.4	48423	2200.4	54771	35883000000	17274	16373	1	2.3002e-56	4.6004e-56	2.5374e-54	TRUE
s_58245	COLCA2	39799	102.43	39799	102.43	43763	7004.1	36196	16363	1	2.353e-57	4.7061e-56	2.5921e-54	TRUE
s_36612	NCAPH2	39799	102.43	39799	102.43	43763	7004.1	36196	16363	1	2.353e-57	4.7061e-56	2.5921e-54	TRUE
s_42811	TASP1	16915	593.36	16915	593.36	50521	2499900000	1241.1	16363	1	2.5648e-56	5.1296e-56	2.8233e-54	TRUE
s_06957	GBX2	102.82	5637	102.82	5637	57631	242030000000	1144600000	16358	1	3.0952e-56	6.1905e-56	3.3952e-54	TRUE
s_09882	ITPR3	0	10596	0.33166	10596	31223	94219	0.39404	16351	1	3.0396e-56	6.0793e-56	3.3365e-54	TRUE
s_08489	HMGN1	0	10596	0.33166	10596	31223	94219	0.39404	16351	1	3.0396e-56	6.0793e-56	3.3365e-54	TRUE
s_39405	GHRL	0	10596	0.33166	10596	31223	94219	0.39404	16351	1	3.0396e-56	6.0793e-56	3.3365e-54	TRUE
s_10690	LLGL2	0	10596	0.33166	10596	31223	94219	0.39404	16351	1	3.0396e-56	6.0793e-56	3.3365e-54	TRUE
s_13080	OR1F1	25.87	1003.1	25.87	1003.1	52237	726900000	3588.1	16314	1	5.9222e-56	1.1844e-55	6.4915e-54	TRUE
s_27863	MICU1	20231	738.17	20231	738.17	51216	389600000	1940.3	16299	1	7.4443e-56	1.4889e-55	8.1541e-54	TRUE
s_30807	U2AF2	16583	38851	16583	38851	3906	983.46	52248	16271	1	1.0274e-55	2.0548e-55	1.123e-54	TRUE
s_56563	MRFAP1	16583	38851	16583	38851	3906	983.46	52248	16271	1	1.0274e-55	2.0548e-55	1.123e-54	TRUE
s_18137	SPTAN1	16583	38851	16583	38851	3906	983.46	52248	16271	1	1.0274e-55	2.0548e-55	1.123e-54	TRUE
s_11453	MGMT	43116	1889.6	43116	1889.6	54214	26314000000	12909	16251	1	1.6841e-55	3.3681e-55	1.8381e-53	TRUE
s_27051	PREB	79599	233.11	79599	233.11	47075	37290	191.98	16.25	1	1.5692e-55	3.1383e-55	1.7139e-53	TRUE
s_27623	BET1	43362	720.51	43362	720.51	51095	3706900000	1861.8	16237	1	2.0334e-55	4.0669e-55	2.2179e-53	TRUE
s_18741	TBCC	36483	91.83	36483	91.83	43198	5602.2	29535	16226	1	2.2075e-55	4.415e-56	2.4044e-53	TRUE
s_07688	GRB2	36483	91.83	36483	91.83	43198	5602.2	29535	16226	1	2.2075e-55	4.415e-56	2.4044e-53	TRUE
s_16061	RFX1	12272	395.58	12272	395.58	49012	109400000	558.61	16218	1	2.7096e-55	5.4191e-55	2.9491e-53	TRUE
s_40020	KRT20	96182	293.15	96182	293.15	47919	59442	305.74	16215	1	2.7771e-55	5.5542e-55	3.0184e-53	TRUE
s_03883	CRH	69649	197.79	69649	197.79	46414	26679	138.51	16214	1	2.7737e-55	5.5474e-55	3.0168e-53	TRUE
s_20567	ZNF41	23216	868.85	23216	868.85	51667	5421300000	2737	16164	1	6.7468e-55	1.3494e-54	7.3279e-53	TRUE
s_16247	RORA	33166	1352.7	33166	1352.7	53082	13332000000	6685.8	16138	1	1.0473e-54	2.0946e-54	1.1367e-52	TRUE
s_30453	SUPT16H	26533	63575	26533	63575	41437	2653.6	14278	16123	1	1.168e-55	2.3359e-54	1.265e-53	TRUE
s_57182	CSMD2	26533	63575	26533	63575	41437	2653.6	14278	16123	1	1.168e-55	2.3359e-54	1.265e-53	TRUE
s_57393	ZNF618	26533	63575	26533	63575	41437	2653.6	14278	16123	1	1.168e-55	2.3359e-54	1.265e-53	TRUE
s_06800	GABRR1	46433	2055.6	46433	2055.6	54382	31189000000	15547	16113	1	1.5949e-54	3.1898e-54	1.7262e-52	TRUE
s_17811	SUMO2	76282	218.98	76282	218.98	46722	32777	172.97	43297	1	2.8827e-54	5.7655e-54	3.1179e-52	TRUE
s_33515	AIPL1	49749	130.68	49749	130.68	4462	11457	61431	16039	1	4.6636e-54	9.3272e-54	5.0406e-52	TRUE
s_75268	C17orf107	33166	81234	33166	81234	42518	4357.1	23688	16009	1	7.3138e-54	1.4628e-53	7.8939e-52	TRUE
s_14345	POLE	33166	81234	33166	81234	42518	4357.1	23688	16009	1	7.3138e-54	1.4628e-53	7.8939e-52	TRUE
s_16002	REN	22553	830	22553	830	51409	4933200000	2545.6	16004	1	8.9532e-54	1.7906e-53	9.6499e-52	TRUE
s_42042	SLC38A7	63016	173.06	63016	173.06	45753	20287	108.58	16004	1	8.2917e-54	1.6583e-53	8.9432e-52	TRUE
s_29874	IFT27	46433	120.09	46433	120.09	44233	9641.5	52109	15992	1	9.7879e-54	1.9576e-53	1.0542e-51	TRUE
s_58505	RNASE8	28523	1109	28523	1109	52326	8890300000	4581.8	15963	1	1.7519e-53	3.5037e-53	1.8843e-51	TRUE
s_16276	RPGR	66332	183.66	66332	183.66	45964	22886	122.99	15962	1	1.6089e-53	3.2177e-53	1.7316e-51	TRUE
s_39322	VPS29	22553	826.47	22553	826.47	51347	4887700000	2545.6	15934	1	2.7501e-53	5.5002e-53	2.9559e-51	TRUE
s_73010	RIMBP3B	12272	388.51	12272	388.51	48753	1051800000	558.61	15919	1	3.3616e-53	6.7232e-53	3.6081e-51	TRUE
s_45778	WDR35	82916	240.17	82916	240.17	4698	39502	212.2	15918	1	3.3156e-53	6.6312e-53	3.5612e-51	TRUE
s_47295	CDH23	36161	45915	36161	45915	39718	1370.6	76302	15902	1	4.0317e-53	8.0635e-53	4.3125e-51	TRUE
s_31895	CLCC1	36161	45915	36161	45915	39718	1370.6	76302	15902	1	4.0317e-53	8.0635e-53	4.3125e-51	TRUE
s_66229	POLR2J2	36161	45915	36161	45915	39718	1370.6	76302	15902	1	4.0317e-53	8.0635e-53	4.3125e-51	TRUE
s_72884	PLEKHG7	36161	45915	36161	45915	39718	1370.6	76302	15902	1	4.0317e-53	8.0635e-53	4.3125e-51	TRUE
s_67433	SLC25A47	36161	45915	36161	45915	39718	1370.6	76302	15902	1	4.0317e-53	8.0635e-53	4.3125e-51	TRUE
s_69419	STAC2	14593	480.34	14593	480.34	49481	1619600000	859.18	15889	1	5.4237e-53	1.0847e-52	5.7973e-51	TRUE
s_08518	HMMR	68322	3281.2	68322	3281.2	55652	8046000000	40999	15867	1	8.4487e-53	1.6897e-52	9.0182e-51	TRUE
s_25685	ULK2	17246	589.83	17246	589.83	50171	2459200000	1302.6	15865	1	8.1501e-53	1.63e-56	8.7055e-51	TRUE
s_10518	LBP	26533	1006.6	26533	1006.6	51936	7293700000	3822.9	15851	1	1.0364e-52	2.0728e-52	1.1055e-50	TRUE
s_31831	EPB41L3	10282	310.81	10282	310.81	47886	66721	360.46	15829	1	1.3884e-52	2.7769e-52	1.48e-54	TRUE
s_51966	KRTAP1-3	39799	98894	39799	98894	43262	6481.3	36196	15776	1	3.0505e-52	6.1011e-52	3.2428e-50	TRUE
s_48746	C20orf195	39799	98894	39799	98894	43262	6481.3	36196	15776	1	3.0505e-52	6.1011e-52	3.2428e-50	TRUE
s_36961	DONSON	39799	98894	39799	98894	43262	6481.3	36196	15776	1	3.0505e-52	6.1011e-52	3.2428e-50	TRUE
s_33043	CABIN1	39799	98894	39799	98894	43262	6481.3	36196	15776	1	3.0505e-52	6.1011e-52	3.2428e-50	TRUE
s_58514	PSMB11	2985	70638	2985	70638	41681	3268.8	18616	15.68	1	1.3698e-51	2.7396e-51	1.4551e-49	TRUE
s_61664	SLC47A2	19236	667.53	19236	667.53	5046	3158200000	1710.7	15674	1	1.6679e-51	3.3357e-51	1.7705e-49	TRUE
s_44860	C16orf62	17246	582.77	17246	582.77	49997	2395500000	1302.6	15669	1	1.8058e-51	3.6116e-51	1.9157e-49	TRUE
s_45579	USP31	22553	812.34	22553	812.34	51099	470800000	2545.6	15654	1	2.3314e-51	4.6628e-51	2.4715e-49	TRUE
s_52671	GSG2	53066	137.75	53066	137.75	44594	12700	71707	15.64	1	2.6513e-51	5.3025e-51	2.8068e-49	TRUE
s_01632	CCND1	53066	137.75	53066	137.75	44594	12700	71707	15.64	1	2.6513e-51	5.3025e-51	2.8068e-49	TRUE
s_75197	C1orf68	71639	3429.5	71639	3429.5	55615	87859000000	46182	15625	1	3.892e-52	7.784e-52	4.1175e-49	TRUE
s_60145	SETD9	69649	190.72	69649	190.72	45892	24628	138.51	15614	1	4.0511e-51	8.1022e-51	4.2829e-49	TRUE
s_28148	BAIAP2	35.82	1441	35.82	1441	52915	15096000000	8108.6	15605	1	5.1286e-51	1.0257e-50	5.4184e-49	TRUE
s_39531	BTBD1	49749	127.15	49749	127.15	44228	10784	61431	15588	1	5.9668e-51	1.1934e-50	6.2953e-49	TRUE
s_18532	SURF6	49749	127.15	49749	127.15	44228	10784	61431	15588	1	5.9668e-51	1.1934e-50	6.2953e-49	TRUE
s_63363	PPTC7	36483	88298	36483	88298	42639	5136.3	29535	15576	1	7.0712e-51	1.4142e-50	7.4452e-49	TRUE
s_05559	ADGRE1	36483	88298	36483	88298	42639	5136.3	29535	15576	1	7.0712e-51	1.4142e-50	7.4452e-49	TRUE
s_54318	CBR4	36483	88298	36483	88298	42639	5136.3	29535	15576	1	7.0712e-51	1.4142e-50	7.4452e-49	TRUE
s_53940	SPINK7	79599	222.51	79599	222.51	46407	33668	191.98	15485	1	3.0634e-50	6.1268e-50	3.2233e-48	TRUE
s_30100	ADAMTS8	45106	1900.2	45106	1900.2	53658	26445000000	14457	15429	1	8.1289e-50	1.6258e-49	8.5473e-48	TRUE
s_03301	CKMT2	23548	844.13	23548	844.13	51055	5079600000	2835.8	15409	1	1.0578e-49	2.1155e-49	1.1107e-47	TRUE
s_53805	MAP1LC3A	96182	279.02	96182	279.02	47209	53342	305.74	15407	1	1.032e-50	2.0641e-49	1.0844e-47	TRUE
s_26396	DENND4B	43116	105.96	43116	105.96	43317	7424.4	43709	15375	1	1.6304e-49	3.2608e-49	1.7108e-47	TRUE
s_65639	2008-03-01	32171	1239.7	32171	1239.7	52251	11093000000	6194.4	15343	1	3.0129e-49	6.0257e-49	3.1594e-47	TRUE
s_45223	ANKRD50	16251	529.79	16251	529.79	49433	1966900000	1123.3	15323	1	3.9414e-49	7.8828e-49	4.1302e-47	TRUE
s_03094	CEACAM7	69649	187.19	69649	187.19	45624	23635	138.51	15314	1	4.2795e-49	8.5589e-49	4.4815e-47	TRUE
s_54813	LGALS12	59699	155.4	59699	155.4	4488	16178	95253	15311	1	4.4013e-49	8.8026e-49	4.606e-48	TRUE
s_36518	C6orf15	26201	957.15	26201	957.15	51385	6552500000	3704.4	15296	1	6.1262e-49	1.2252e-48	6.4067e-47	TRUE
s_69332	OR6C4	33166	77702	33166	77702	41884	3948.1	23688	15284	1	6.5355e-49	1.3071e-48	6.8027e-47	TRUE
s_46164	PLEKHA4	33166	77702	33166	77702	41884	3948.1	23688	15284	1	6.5355e-49	1.3071e-48	6.8027e-47	TRUE
s_04144	CST6	33166	77702	33166	77702	41884	3948.1	23688	15284	1	6.5355e-49	1.3071e-48	6.8027e-47	TRUE
s_55646	TCEAL8	33166	77702	33166	77702	41884	3948.1	23688	15284	1	6.5355e-49	1.3071e-48	6.8027e-47	TRUE
s_22954	RIOK3	33166	77702	33166	77702	41884	3948.1	23688	15284	1	6.5355e-49	1.3071e-48	6.8027e-47	TRUE
s_00240	ACVRL1	33166	77702	33166	77702	41884	3948.1	23688	15284	1	6.5355e-49	1.3071e-48	6.8027e-47	TRUE
s_17184	SFRP4	33166	77702	33166	77702	41884	3948.1	23688	15284	1	6.5355e-49	1.3071e-48	6.8027e-47	TRUE
s_41176	TTC12	26865	985.41	26865	985.41	51457	6.95e+05	3943.6	15264	1	1.0008e-48	2.0016e-48	1.041e-47	TRUE
s_12661	NME2	79599	218.98	79599	218.98	46177	32503	191.98	15.23	1	1.5613e-48	3.1227e-48	1.623e-47	TRUE
s_67057	SEC14L3	18241	607.49	18241	607.49	49829	2596400000	1498.3	15223	1	1.8235e-48	3.647e-49	1.8942e-46	TRUE
s_09030	HTR1F	45106	1875.5	45106	1875.5	53469	25707000000	14457	15223	1	1.925e-49	3.8501e-48	1.9983e-46	TRUE
s_06031	FANCC	39799	95362	39799	95362	42743	5979.6	36196	15189	1	2.8057e-48	5.6114e-48	2.9038e-46	TRUE
s_17470	SLC2A4	26533	60043	26533	60043	40625	2337.2	14278	15188	1	2.8066e-48	5.6132e-48	2.9038e-46	TRUE
s_34845	CLEC4E	26533	60043	26533	60043	40625	2337.2	14278	15188	1	2.8066e-48	5.6132e-48	2.9038e-46	TRUE
s_15582	PXMP2	26533	60043	26533	60043	40625	2337.2	14278	15188	1	2.8066e-48	5.6132e-48	2.9038e-46	TRUE
s_61688	C17orf50	26533	60043	26533	60043	40625	2337.2	14278	15188	1	2.8066e-48	5.6132e-48	2.9038e-46	TRUE
s_49346	MUL1	49749	123.62	49749	123.62	43824	10133	61431	15137	1	6.2362e-48	1.2472e-47	6.4435e-46	TRUE
s_19561	TRAF3	49749	123.62	49749	123.62	43824	10133	61431	15137	1	6.2362e-48	1.2472e-47	6.4435e-46	TRUE
s_67218	BCL9L	31508	1190.3	31508	1190.3	51956	10191000000	5879.3	15112	1	1.0206e-47	2.0413e-47	1.0538e-45	TRUE
s_56266	ATXN3L	17578	575.7	17578	575.7	49562	2324700000	1366	15101	1	1.1688e-47	2.3376e-47	1.206e-46	TRUE
s_49087	ZNF576	29186	1080.8	29186	1080.8	51634	8374100000	4853.4	15095	1	1.327e-48	2.6541e-47	1.3684e-45	TRUE
s_69376	ZNF774	31.84	1204.4	31.84	1204.4	51979	10437000000	6035.6	15093	1	1.3706e-47	2.7413e-47	1.4124e-45	TRUE
s_05665	EPHA8	61026	2705.5	61026	2705.5	54474	54043000000	30874	43235	1	2.721e-48	5.442e-48	2.8021e-45	TRUE
s_48951	RNF26	96845	4817.5	96845	4817.5	56219	174360000000	98488	15042	1	3.1206e-47	6.2413e-47	3.2115e-45	TRUE
s_62560	LRRC34	69649	183.66	69649	183.66	45351	22663	138.51	15014	1	4.1329e-47	8.2658e-47	4.2476e-45	TRUE
s_58992	ACER1	46433	113.02	46433	113.02	43366	8431.7	52109	15014	1	4.0395e-47	8.079e-48	4.1543e-45	TRUE
s_36036	RPS6KA6	72966	194.26	72966	194.26	45567	25405	155.16	15009	1	4.4332e-47	8.8664e-47	4.5532e-45	TRUE
s_11515	MKI67	65669	2956.2	65669	2956.2	54711	64679000000	37117	15004	1	5.4925e-47	1.0985e-46	5.6337e-45	TRUE
s_65964	RSBN1L	19568	653.41	19568	653.41	49917	3005300000	1785.3	15001	1	5.3197e-47	1.0639e-46	5.46e-49	TRUE
s_08883	HSD11B2	63016	162.47	63016	162.47	44847	17649	108.58	14987	1	6.1616e-47	1.2323e-46	6.3158e-45	TRUE
s_13728	PFDN4	41126	1645.9	41126	1645.9	52889	19676000000	11466	14987	1	6.9257e-47	1.3851e-46	7.0943e-45	TRUE
s_71561	OR51M1	56714	2454.7	56714	2454.7	54111	44322000000	25686	14962	1	1.0166e-46	2.0331e-46	1.0406e-44	TRUE
s_69887	OTOP3	59699	151.87	59699	151.87	4455	15377	95253	14949	1	1.0761e-46	2.1522e-46	1.1009e-44	TRUE
s_55266	DPH6	36483	84766	36483	84766	42056	4691.6	29535	14926	1	1.4873e-46	2.9745e-46	1.5155e-44	TRUE
s_71327	SMIM20	36483	84766	36483	84766	42056	4691.6	29535	14926	1	1.4873e-46	2.9745e-46	1.5155e-44	TRUE
s_06673	KDSR	36483	84766	36483	84766	42056	4691.6	29535	14926	1	1.4873e-46	2.9745e-46	1.5155e-44	TRUE
s_73342	LRRC37A2	36483	84766	36483	84766	42056	4691.6	29535	14926	1	1.4873e-46	2.9745e-46	1.5155e-44	TRUE
s_08955	HSPA9	36483	84766	36483	84766	42056	4691.6	29535	14926	1	1.4873e-46	2.9745e-46	1.5155e-44	TRUE
s_75669	NPIPA5	36483	84766	36483	84766	42056	4691.6	29535	14926	1	1.4873e-46	2.9745e-46	1.5155e-44	TRUE
s_77304	Non-TargetingControl	30181	1112.6	30181	1112.6	51584	8867200000	5278.6	14898	1	2.5791e-46	5.1582e-46	2.6245e-44	TRUE
s_42273	DDX19A	56383	141.28	56383	141.28	44218	13262	82971	14891	1	2.5787e-46	5.1574e-46	2.6245e-44	TRUE
s_56550	CACNA2D4	63679	2818.5	63679	2818.5	5446	58638000000	34357	14862	1	4.5699e-46	9.1397e-46	4.6352e-44	TRUE
s_20959	DAP3	2985	67107	2985	67107	40952	2916.7	18616	14861	1	3.8787e-46	7.7575e-46	3.9393e-44	TRUE
s_66784	TCERG1L	2985	67107	2985	67107	40952	2916.7	18616	14861	1	3.8787e-46	7.7575e-46	3.9393e-44	TRUE
s_23053	GALR2	2985	67107	2985	67107	40952	2916.7	18616	14861	1	3.8787e-46	7.7575e-46	3.9393e-44	TRUE
s_38049	LEF1	18241	593.36	18241	593.36	49491	2466400000	1498.3	14858	1	4.5234e-46	9.0467e-46	4.591e-45	TRUE
s_22004	TPST2	11608	339.06	11608	339.06	47534	78891	486.72	14843	1	5.5275e-46	1.1055e-45	5.5955e-44	TRUE
s_67169	STK32C	43116	102.43	43116	102.43	42833	6887	43709	14.84	1	5.403e-47	1.0806e-45	5.473e-45	TRUE
s_03858	CREB1	43116	102.43	43116	102.43	42833	6887	43709	14.84	1	5.403e-47	1.0806e-45	5.473e-45	TRUE
s_04279	CTSW	53066	130.68	53066	130.68	4384	11304	71707	14806	1	9.1616e-46	1.8323e-45	9.2683e-44	TRUE
s_62620	CMC1	43362	656.94	43362	656.94	49764	3031600000	1861.8	14764	1	1.8519e-45	3.7039e-45	1.8723e-43	TRUE
s_14689	PPP6C	15.92	498	15.92	498	48823	1724700000	1067	14758	1	1.9812e-45	3.9624e-45	2.0017e-43	TRUE
s_67968	ZNF326	23216	794.68	23216	794.68	50381	4465500000	2737	14746	1	2.4239e-45	4.8478e-45	2.4473e-43	TRUE
s_18190	SRM	37.81	1458.7	37.81	1458.7	52331	15362000000	9285.9	14745	1	2.5392e-45	5.0785e-45	2.5621e-43	TRUE
s_35885	PDCD4	51076	2122.7	51076	2122.7	53498	3293000000	19749	14741	1	2.7241e-45	5.4482e-45	2.7468e-43	TRUE
s_74431	LGALS9C	50744	2105	50744	2105	5347	32375000000	19429	14738	1	2.8593e-45	5.7187e-45	2.872e-44	TRUE
s_16050	RFNG	16583	35319	16583	35319	37722	795.39	52248	14726	1	2.8537e-45	5.7074e-45	2.8682e-43	TRUE
s_71409	LAMTOR4	16583	35319	16583	35319	37722	795.39	52248	14726	1	2.8537e-45	5.7074e-45	2.8682e-43	TRUE
s_48716	GGCT	16583	35319	16583	35319	37722	795.39	52248	14726	1	2.8537e-45	5.7074e-45	2.8682e-43	TRUE
s_41366	C17orf80	16583	35319	16583	35319	37722	795.39	52248	14726	1	2.8537e-45	5.7074e-45	2.8682e-43	TRUE
s_44797	TOMM22	16583	35319	16583	35319	37722	795.39	52248	14726	1	2.8537e-45	5.7074e-45	2.8682e-43	TRUE
s_43676	ZNF395	10282	289.62	10282	289.62	46871	57143	360.46	14713	1	3.7726e-45	7.5453e-45	3.7869e-43	TRUE
s_13527	PDE4D	66332	169.53	66332	169.53	44816	19184	122.99	14689	1	5.2612e-45	1.0522e-44	5.2674e-43	TRUE
s_22821	RNGTT	13266	28255	13266	28255	36524	508.13	33618	14687	1	5.1173e-45	1.0235e-44	5.1266e-43	TRUE
s_24546	EFTUD2	13266	28255	13266	28255	36524	508.13	33618	14687	1	5.1173e-45	1.0235e-44	5.1266e-43	TRUE
s_59245	MAB21L3	13266	28255	13266	28255	36524	508.13	33618	14687	1	5.1173e-45	1.0235e-44	5.1266e-43	TRUE
s_39373	FBXO40	49749	120.09	49749	120.09	4341	9503.1	61431	14687	1	5.3246e-45	1.0649e-44	5.3239e-43	TRUE
s_50290	ZNF672	49749	120.09	49749	120.09	4341	9503.1	61431	14687	1	5.3246e-45	1.0649e-44	5.3239e-43	TRUE
s_04886	DNAH6	11608	335.53	11608	335.53	47383	77098	486.72	14683	1	5.9377e-45	1.1875e-44	5.9332e-43	TRUE
s_03956	CRYBA4	12603	370.85	12603	370.85	47727	94519	596.83	14664	1	7.8333e-45	1.5667e-44	7.8223e-43	TRUE
s_71299	VGLL3	32503	1200.9	32503	1200.9	51648	10335000000	6355.7	14655	1	9.4788e-45	1.8958e-44	9.4594e-43	TRUE
s_28157	MERTK	32171	1183.2	32171	1183.2	51578	10025000000	6194.4	14625	1	1.4857e-44	2.9714e-44	1.4779e-42	TRUE
s_38696	TRAPPC4	36161	42383	36161	42383	38589	1146.8	76302	14623	1	1.3086e-44	2.6173e-44	1.3026e-42	TRUE
s_23146	GGH	36161	42383	36161	42383	38589	1146.8	76302	14623	1	1.3086e-44	2.6173e-44	1.3026e-42	TRUE
s_16408	RPL28	36161	42383	36161	42383	38589	1146.8	76302	14623	1	1.3086e-44	2.6173e-44	1.3026e-42	TRUE
s_65624	CBWD5	36161	42383	36161	42383	38589	1146.8	76302	14623	1	1.3086e-44	2.6173e-44	1.3026e-42	TRUE
s_62947	C7orf66	10945	310.81	10945	310.81	47062	65922	420.72	14619	1	1.5044e-44	3.0089e-44	1.4946e-42	TRUE
s_12693	NONO	10945	310.81	10945	310.81	47062	65922	420.72	14619	1	1.5044e-44	3.0089e-44	1.4946e-42	TRUE
s_16398	RPL30	39799	91.83	39799	91.83	42204	5499.1	36196	14602	1	1.8309e-44	3.6618e-44	1.8166e-42	TRUE
s_57746	ZNF837	39799	91.83	39799	91.83	42204	5499.1	36196	14602	1	1.8309e-44	3.6618e-44	1.8166e-42	TRUE
s_16556	RPS12	59699	148.34	59699	148.34	44213	14598	95253	14588	1	2.3094e-44	4.6189e-44	2.2899e-42	TRUE
s_64307	PTCRA	21558	716.98	21558	716.98	49922	3616100000	2274	14583	1	2.6687e-44	5.3375e-44	2.6445e-42	TRUE
s_03138	AKR1C4	35156	1317.4	35156	1317.4	51884	12469000000	7737.3	14577	1	2.9873e-44	5.9746e-44	2.9583e-42	TRUE
s_56470	IGSF8	56383	2373.5	56383	2373.5	53708	41256000000	25311	14564	1	3.7164e-44	7.4328e-44	3.6686e-42	TRUE
s_05631	EPB41L2	33166	74.17	33166	74.17	41222	3560.2	23688	14558	1	3.4568e-44	6.9135e-44	3.4145e-42	TRUE
s_15667	RAB5B	33166	74.17	33166	74.17	41222	3560.2	23688	14558	1	3.4568e-44	6.9135e-44	3.4145e-42	TRUE
s_69499	PRAMEF9	33166	74.17	33166	74.17	41222	3560.2	23688	14558	1	3.4568e-44	6.9135e-44	3.4145e-42	TRUE
s_44256	RPRM	33166	74.17	33166	74.17	41222	3560.2	23688	14558	1	3.4568e-44	6.9135e-44	3.4145e-42	TRUE
s_55371	OTULIN	23.88	812.34	23.88	812.34	50308	4661100000	2936.8	14549	1	4.4004e-44	8.8007e-44	4.341e-43	TRUE
s_06828	B4GALNT1	46433	109.49	46433	109.49	42912	7858.6	52109	14524	1	5.7392e-44	1.1478e-43	5.6546e-42	TRUE
s_33657	HYPK	46433	109.49	46433	109.49	42912	7858.6	52109	14524	1	5.7392e-44	1.1478e-43	5.6546e-42	TRUE
s_15596	PEX5	56383	137.75	56383	137.75	43855	12540	82971	14503	1	7.9012e-44	1.5802e-43	7.7748e-42	TRUE
s_45010	HRASLS	56383	137.75	56383	137.75	43855	12540	82971	14503	1	7.9012e-44	1.5802e-43	7.7748e-42	TRUE
s_73212	OR10J3	13598	402.64	13598	402.64	47892	1115600000	720.8	14491	1	1.0001e-43	2.0001e-43	9.8343e-42	TRUE
s_37802	SH3GLB1	48754	1967.3	48754	1967.3	5306	2815000000	17572	14473	1	1.3991e-43	2.7983e-43	1.375e-42	TRUE
s_66180	DEFB128	79599	208.38	79599	208.38	45465	29138	191.98	14465	1	1.4022e-43	2.8043e-43	1.3771e-41	TRUE
s_14530	PPIB	23216	49447	23216	49447	39248	1562.2	10632	14453	1	1.5774e-43	3.1549e-43	1.5424e-41	TRUE
s_74584	TSPY3	23216	49447	23216	49447	39248	1562.2	10632	14453	1	1.5774e-43	3.1549e-43	1.5424e-41	TRUE
s_05478	ELANE	23216	49447	23216	49447	39248	1562.2	10632	14453	1	1.5774e-43	3.1549e-43	1.5424e-41	TRUE
s_25412	RGS6	23216	49447	23216	49447	39248	1562.2	10632	14453	1	1.5774e-43	3.1549e-43	1.5424e-41	TRUE
s_72459	TOMM5	23216	49447	23216	49447	39248	1562.2	10632	14453	1	1.5774e-43	3.1549e-43	1.5424e-41	TRUE
s_69155	KLHL38	23216	49447	23216	49447	39248	1562.2	10632	14453	1	1.5774e-43	3.1549e-43	1.5424e-41	TRUE
s_61018	NANP	23216	49447	23216	49447	39248	1562.2	10632	14453	1	1.5774e-43	3.1549e-43	1.5424e-41	TRUE
s_64127	ARX	72966	187.19	72966	187.19	45035	23411	155.16	14442	1	1.9498e-43	3.8995e-43	1.904e-42	TRUE
s_67413	PROX2	72966	187.19	72966	187.19	45035	23411	155.16	14442	1	1.9498e-43	3.8995e-43	1.904e-42	TRUE
s_64396	RILPL2	96182	261.36	96182	261.36	46269	46200	305.74	14397	1	3.7957e-43	7.5913e-43	3.7043e-41	TRUE
s_15899	RBBP7	53066	127.15	53066	127.15	43448	10639	71707	14389	1	4.1534e-43	8.3067e-43	4.0509e-41	TRUE
s_22432	KLF7	43116	1674.1	43116	1674.1	52468	20257000000	12909	14355	1	7.6286e-43	1.5257e-42	7.431e-42	TRUE
s_01417	ATP5D	34825	1282.1	34825	1282.1	51625	11774000000	7555.6	14349	1	8.2355e-43	1.6471e-42	8.0171e-41	TRUE
s_48750	AHNAK	0.99499	21192	0.99499	21192	34756	284.97	19824	14344	1	7.6129e-43	1.5226e-42	7.4204e-41	TRUE
s_08998	NDST1	99167	4736.3	99167	4736.3	55636	167520000000	1045300000	14343	1	9.5223e-43	1.9045e-42	9.2641e-41	TRUE
s_41105	COMMD8	49418	1981.4	49418	1981.4	52972	28527000000	18179	14329	1	1.1168e-42	2.2336e-42	1.0845e-40	TRUE
s_25691	PCDHGA8	12935	374.38	12935	374.38	47516	96022	636.58	14326	1	1.0845e-42	2.1691e-42	1.0545e-40	TRUE
s_50248	PODNL1	15.92	483.87	15.92	483.87	48408	1619400000	1067	14326	1	1.0995e-42	2.199e-43	1.0683e-40	TRUE
s_70458	CERKL	43779	1702.4	43779	1702.4	52494	20952000000	13413	14321	1	1.2476e-42	2.4953e-42	1.2107e-40	TRUE
s_12255	NCL	43116	98894	43116	98894	42332	6370.8	43709	14306	1	1.3477e-42	2.6953e-42	1.3054e-40	TRUE
s_58674	NRN1L	43116	98894	43116	98894	42332	6370.8	43709	14306	1	1.3477e-42	2.6953e-42	1.3054e-40	TRUE
s_66931	ALS2CL	43116	98894	43116	98894	42332	6370.8	43709	14306	1	1.3477e-42	2.6953e-42	1.3054e-40	TRUE
s_44047	PCDHA2	36483	81234	36483	81234	4145	4267.9	29535	14276	1	2.0543e-42	4.1086e-42	1.9873e-40	TRUE
s_49517	USB1	36483	81234	36483	81234	4145	4267.9	29535	14276	1	2.0543e-42	4.1086e-42	1.9873e-40	TRUE
s_39811	CYCS	26533	56511	26533	56511	39766	2041.8	14278	14253	1	2.8256e-42	5.6511e-42	2.7267e-40	TRUE
s_20110	VCP	26533	56511	26533	56511	39766	2041.8	14278	14253	1	2.8256e-42	5.6511e-42	2.7267e-40	TRUE
s_67976	RIMKLA	26533	56511	26533	56511	39766	2041.8	14278	14253	1	2.8256e-42	5.6511e-42	2.7267e-40	TRUE
s_73913	WIPF3	26533	56511	26533	56511	39766	2041.8	14278	14253	1	2.8256e-42	5.6511e-42	2.7267e-40	TRUE
s_62011	CREB3L4	59699	144.81	59699	144.81	43868	13839	95253	14226	1	4.3505e-42	8.701e-43	4.193e-41	TRUE
s_06717	GAA	59699	144.81	59699	144.81	43868	13839	95253	14226	1	4.3505e-42	8.701e-43	4.193e-41	TRUE
s_03844	CR2	71971	3139.9	71971	3139.9	54277	72613000000	46721	14193	1	7.9891e-42	1.5978e-41	7.6951e-40	TRUE
s_14928	MAP2K2	34639	335.53	34639	335.53	47009	76674	521.92	14164	1	1.0874e-41	2.1748e-41	1.0467e-39	TRUE
s_64126	ARX	44774	1730.6	44774	1730.6	52415	21631000000	14191	14152	1	1.4074e-41	2.8148e-41	1.3539e-39	TRUE
s_36442	TIMM21	16915	512.13	16915	512.13	48401	1812800000	1241.1	14057	1	5.0879e-41	1.0176e-40	4.8915e-39	TRUE
s_20157	VIM	2985	63575	2985	63575	40183	2585.5	18616	14043	1	5.6362e-41	1.1272e-40	5.3986e-39	TRUE
s_04879	DNA2	2985	63575	2985	63575	40183	2585.5	18616	14043	1	5.6362e-41	1.1272e-40	5.3986e-39	TRUE
s_12650	NMB	2985	63575	2985	63575	40183	2585.5	18616	14043	1	5.6362e-41	1.1272e-40	5.3986e-39	TRUE
s_16389	RPL26	2985	63575	2985	63575	40183	2585.5	18616	14043	1	5.6362e-41	1.1272e-40	5.3986e-39	TRUE
s_19511	TPMT	2985	63575	2985	63575	40183	2585.5	18616	14043	1	5.6362e-41	1.1272e-40	5.3986e-39	TRUE
s_08890	HSD17B3	2985	63575	2985	63575	40183	2585.5	18616	14043	1	5.6362e-41	1.1272e-40	5.3986e-39	TRUE
s_69509	OR6F1	46433	105.96	46433	105.96	42444	7306.5	52109	14035	1	6.4253e-41	1.2851e-40	6.1506e-39	TRUE
s_68015	FAM150B	23.88	784.09	23.88	784.09	49798	4314900000	2936.8	14028	1	7.8461e-41	1.5692e-40	7.506e-40	TRUE
s_46234	KIAA1586	20895	664	20895	664	49247	3075700000	2103.2	14023	1	8.3295e-41	1.6659e-40	7.9635e-39	TRUE
s_57954	GALNT15	39799	88298	39799	88298	41644	5039.7	36196	14015	1	8.4783e-41	1.6957e-40	8.0908e-39	TRUE
s_04422	CYP11A1	39799	88298	39799	88298	41644	5039.7	36196	14015	1	8.4783e-41	1.6957e-40	8.0908e-39	TRUE
s_75370	LOC100131303	39799	88298	39799	88298	41644	5039.7	36196	14015	1	8.4783e-41	1.6957e-40	8.0908e-39	TRUE
s_01221	ART3	36815	1342.1	36815	1342.1	51505	12881000000	8685.2	14006	1	1.09e-44	2.18e-44	1.0395e-38	TRUE
s_29262	SPINT3	96182	254.3	96182	254.3	45876	43493	305.74	13993	1	1.208e-41	2.4159e-40	1.1513e-38	TRUE
s_38645	ANGPT4	86232	222.51	86232	222.51	45377	33127	233.66	13993	1	1.2135e-40	2.4271e-40	1.1559e-38	TRUE
s_54597	MICALCL	82916	211.92	82916	211.92	45182	29986	212.2	13978	1	1.4752e-40	2.9504e-40	1.4043e-38	TRUE
s_47962	ATPAF1	53066	123.62	53066	123.62	43045	9994	71707	13972	1	1.5835e-40	3.1671e-40	1.5056e-38	TRUE
s_01827	BNIP2	53066	123.62	53066	123.62	43045	9994	71707	13972	1	1.5835e-40	3.1671e-40	1.5056e-38	TRUE
s_26743	PDCD6	63016	151.87	63016	151.87	4388	15203	108.58	13.97	1	1.6355e-40	3.271e-41	1.554e-39	TRUE
s_24622	SLC9A3R1	31508	1102	31508	1102	50844	8620300000	5879.3	13961	1	2.0554e-40	4.1108e-40	1.9518e-38	TRUE
s_34752	PITPNC1	29518	1013.7	29518	1013.7	50552	7270500000	4992.7	13928	1	3.2322e-40	6.4643e-40	3.0674e-38	TRUE
s_49423	NDNF	41458	1547	41458	1547	51882	17181000000	11699	13919	1	3.7447e-40	7.4894e-40	3.5495e-38	TRUE
s_32150	PLCL2	35.82	1289.2	35.82	1289.2	51309	11857000000	8108.6	13919	1	3.7318e-40	7.4635e-40	3.5394e-38	TRUE
s_43991	PCDHB3	72966	180.13	72966	180.13	44484	21502	155.16	13875	1	6.2263e-40	1.2453e-39	5.8945e-38	TRUE
s_71235	BOLA3	72966	180.13	72966	180.13	44484	21502	155.16	13875	1	6.2263e-40	1.2453e-39	5.8945e-38	TRUE
s_54975	TNKS1BP1	59699	141.28	59699	141.28	43514	13102	95253	13864	1	7.1939e-40	1.4388e-39	6.794e-39	TRUE
s_56025	CHRDL1	59699	141.28	59699	141.28	43514	13102	95253	13864	1	7.1939e-40	1.4388e-39	6.794e-39	TRUE
s_02755	CD79A	59699	141.28	59699	141.28	43514	13102	95253	13864	1	7.1939e-40	1.4388e-39	6.794e-39	TRUE
s_17949	SON	59699	141.28	59699	141.28	43514	13102	95253	13864	1	7.1939e-40	1.4388e-39	6.794e-39	TRUE
s_25450	ZNF592	33166	70638	33166	70638	40528	3193.3	23688	13832	1	1.0824e-39	2.1649e-39	1.0204e-37	TRUE
s_72329	C2orf66	33166	70638	33166	70638	40528	3193.3	23688	13832	1	1.0824e-39	2.1649e-39	1.0204e-37	TRUE
s_53014	RPF2	33166	70638	33166	70638	40528	3193.3	23688	13832	1	1.0824e-39	2.1649e-39	1.0204e-37	TRUE
s_64759	TIGD1	19568	603.96	19568	603.96	48784	2530600000	1785.3	13831	1	1.2236e-39	2.4471e-39	1.1527e-37	TRUE
s_73827	GOLGA8N	92865	240.17	92865	240.17	45512	38616	280.41	13788	1	2.1198e-39	4.2397e-39	1.9947e-37	TRUE
s_01101	ARG2	49749	113.02	49749	113.02	42542	8306.4	61431	13785	1	2.1167e-39	4.2334e-39	1.9929e-37	TRUE
s_39846	GPR85	43116	95362	43116	95362	41812	5875.6	43709	13772	1	2.5303e-39	5.0606e-39	2.3794e-37	TRUE
s_64274	RHOV	10945	293.15	10945	293.15	46221	57960	420.72	13758	1	3.2271e-39	6.4543e-39	3.0329e-37	TRUE
s_66301	ZBTB38	14261	406.17	14261	406.17	47377	1126700000	811.42	13758	1	3.2831e-39	6.5662e-39	3.0836e-37	TRUE
s_09755	ITGA3	18905	575.7	18905	575.7	48566	2293500000	1638	13758	1	3.372e-40	6.7441e-39	3.1653e-37	TRUE
s_76935	Non-TargetingControl	81921	3574.3	81921	3574.3	54302	94099000000	64681	13732	1	5.2115e-39	1.0423e-38	4.8889e-37	TRUE
s_51255	SRCIN1	14925	427.36	14925	427.36	47495	1248700000	908.6	13683	1	9.3341e-39	1.8668e-38	8.7511e-37	TRUE
s_48277	NT5DC2	36483	77702	36483	77702	40816	3865.2	29535	13626	1	1.8637e-38	3.7275e-38	1.7452e-36	TRUE
s_24648	PPT2	36483	77702	36483	77702	40816	3865.2	29535	13626	1	1.8637e-38	3.7275e-38	1.7452e-36	TRUE
s_50039	ZNF552	37478	1335.1	37478	1335.1	51178	12695000000	9083	13615	1	2.4914e-38	4.9827e-38	2.3315e-36	TRUE
s_30068	ESM1	35156	1232.6	35156	1232.6	50925	10791000000	7737.3	13614	1	2.5344e-38	5.0688e-38	2.3704e-36	TRUE
s_26251	SETDB1	32835	1130.2	32835	1130.2	50632	9042700000	6519.5	13591	1	3.4431e-38	6.8862e-38	3.2164e-36	TRUE
s_20635	ZNF91	10945	289.62	10945	289.62	46047	56431	420.72	13586	1	3.4409e-38	6.8818e-38	3.2162e-36	TRUE
s_06535	FOLR1	53066	120.09	53066	120.09	4263	9370.4	71707	13554	1	5.0779e-38	1.0156e-37	4.7349e-36	TRUE
s_66452	AKNAD1	53066	120.09	53066	120.09	4263	9370.4	71707	13554	1	5.0779e-38	1.0156e-37	4.7349e-36	TRUE
s_75946	CT47A12	53066	120.09	53066	120.09	4263	9370.4	71707	13554	1	5.0779e-38	1.0156e-37	4.7349e-36	TRUE
s_56956	CHST14	46433	102.43	46433	102.43	41959	6775.6	52109	13546	1	5.6687e-38	1.1337e-37	5.2827e-36	TRUE
s_19136	TH	59699	137.75	59699	137.75	43151	12386	95253	13502	1	1.0443e-37	2.0885e-37	9.7256e-36	TRUE
s_50559	GREB1L	31508	1066.6	31508	1066.6	50375	8030100000	5879.3	43233	1	1.1858e-37	2.3717e-37	1.1038e-35	TRUE
s_18872	TCF21	14593	409.7	14593	409.7	47191	1143200000	859.18	13.48	1	1.493e-38	2.9859e-37	1.3888e-35	TRUE
s_18335	STAC	50744	1924.9	50744	1924.9	5218	26677000000	19429	13446	1	2.5388e-37	5.0776e-37	2.3588e-35	TRUE
s_48420	MARCKSL1	79599	194.26	79599	194.26	44457	24949	191.98	13446	1	2.2802e-37	4.5604e-37	2.1198e-35	TRUE
s_36405	CCDC59	39799	84766	39799	84766	41062	4601.2	36196	13428	1	2.7862e-37	5.5724e-37	2.584e-36	TRUE
s_37712	CUTC	39799	84766	39799	84766	41062	4601.2	36196	13428	1	2.7862e-37	5.5724e-37	2.584e-36	TRUE
s_07024	GDF1	39799	84766	39799	84766	41062	4601.2	36196	13428	1	2.7862e-37	5.5724e-37	2.584e-36	TRUE
s_25262	SPAG6	66332	155.4	66332	155.4	43568	15822	122.99	13415	1	3.4204e-37	6.8408e-37	3.1703e-35	TRUE
s_72936	GPR179	42784	1550.5	42784	1550.5	51471	17174000000	12661	13399	1	4.7097e-37	9.4194e-37	4.3627e-35	TRUE
s_51857	VMP1	23216	724.04	23216	724.04	4904	3644500000	2737	13396	1	4.7533e-37	9.5066e-37	4.4005e-35	TRUE
s_19317	GPR137B	59368	2331.1	59368	2331.1	52717	39349000000	28811	13384	1	5.9205e-37	1.1841e-36	5.4778e-35	TRUE
s_72985	HIST2H2BF	27528	893.58	27528	893.58	49708	5592700000	4192	13376	1	6.267e-38	1.2534e-36	5.7777e-35	TRUE
s_77384	Non-TargetingControl	29186	960.68	29186	960.68	49936	6480800000	4853.4	13371	1	6.7563e-37	1.3513e-36	6.225e-36	TRUE
s_16349	RPL15	23216	45915	23216	45915	38201	1323.5	10632	13.37	1	5.9671e-37	1.1934e-36	5.5045e-35	TRUE
s_64910	HACD2	23216	45915	23216	45915	38201	1323.5	10632	13.37	1	5.9671e-37	1.1934e-36	5.5045e-35	TRUE
s_17614	SLC12A1	23216	45915	23216	45915	38201	1323.5	10632	13.37	1	5.9671e-37	1.1934e-36	5.5045e-35	TRUE
s_72898	RNASE13	23216	45915	23216	45915	38201	1323.5	10632	13.37	1	5.9671e-37	1.1934e-36	5.5045e-35	TRUE
s_74481	RNF208	23216	45915	23216	45915	38201	1323.5	10632	13.37	1	5.9671e-37	1.1934e-36	5.5045e-35	TRUE
s_18402	STK3	36161	38851	36161	38851	37364	943.78	76302	13344	1	8.3439e-37	1.6688e-36	7.6832e-35	TRUE
s_64399	DNAH10	49749	109.49	49749	109.49	42088	7739.7	61431	13335	1	9.8565e-37	1.9713e-36	9.0653e-35	TRUE
s_72318	PAIP2B	0.66332	14128	0.66332	14128	31851	125.92	10196	13334	1	9.8452e-37	1.969e-37	9.0602e-35	TRUE
s_51134	PUS1	25206	798.21	25206	798.21	49306	4442200000	3362.3	13331	1	1.1408e-36	2.2816e-36	1.0486e-34	TRUE
s_04343	CYP1B1	26533	52979	26533	52979	38851	1767.3	14278	13318	1	1.1924e-36	2.3848e-36	1.0928e-34	TRUE
s_34686	NOC2L	26533	52979	26533	52979	38851	1767.3	14278	13318	1	1.1924e-36	2.3848e-36	1.0928e-34	TRUE
s_37994	ZNF580	26533	52979	26533	52979	38851	1767.3	14278	13318	1	1.1924e-36	2.3848e-36	1.0928e-34	TRUE
s_17865	SNRPA1	26533	52979	26533	52979	38851	1767.3	14278	13318	1	1.1924e-36	2.3848e-36	1.0928e-34	TRUE
s_19430	TNS1	26533	52979	26533	52979	38851	1767.3	14278	13318	1	1.1924e-36	2.3848e-36	1.0928e-34	TRUE
s_62828	FAM71B	40463	1437.5	40463	1437.5	51166	14711000000	11008	13315	1	1.4477e-36	2.8954e-36	1.326e-35	TRUE
s_18276	SSRP1	86232	211.92	86232	211.92	44676	29740	233.66	13299	1	1.6363e-36	3.2726e-36	1.4978e-34	TRUE
s_03365	CLCN7	63016	144.81	63016	144.81	43197	13678	108.58	13292	1	1.7703e-36	3.5405e-36	1.6195e-34	TRUE
s_40256	DLL4	69981	2839.7	69981	2839.7	53227	5871000000	43544	13273	1	2.6339e-36	5.2677e-36	2.4081e-34	TRUE
s_25305	PRDX6	17.91	519.19	17.91	519.19	47818	1847700000	1431.2	13.25	1	3.2897e-36	6.5793e-36	3.006e-35	TRUE
s_69588	NOTO	10945	282.55	10945	282.55	45692	53439	420.72	13242	1	3.5805e-36	7.161e-37	3.2621e-34	TRUE
s_09261	IFNB1	43116	91.83	43116	91.83	41274	5401.4	43709	13238	1	3.5764e-36	7.1528e-36	3.2603e-34	TRUE
s_55446	TICRR	43116	91.83	43116	91.83	41274	5401.4	43709	13238	1	3.5764e-36	7.1528e-36	3.2603e-34	TRUE
s_64171	HTR3C	43116	91.83	43116	91.83	41274	5401.4	43709	13238	1	3.5764e-36	7.1528e-36	3.2603e-34	TRUE
s_11837	MT2A	43116	91.83	43116	91.83	41274	5401.4	43709	13238	1	3.5764e-36	7.1528e-36	3.2603e-34	TRUE
s_55302	VWA5B2	2985	60043	2985	60043	39372	2275.3	18616	13224	1	4.2044e-36	8.4087e-36	3.817e-35	TRUE
s_55880	RSAD2	2985	60043	2985	60043	39372	2275.3	18616	13224	1	4.2044e-36	8.4087e-36	3.817e-35	TRUE
s_48099	EFCAB6	2985	60043	2985	60043	39372	2275.3	18616	13224	1	4.2044e-36	8.4087e-36	3.817e-35	TRUE
s_25640	EMC2	2985	60043	2985	60043	39372	2275.3	18616	13224	1	4.2044e-36	8.4087e-36	3.817e-35	TRUE
s_47984	ZNF574	2985	60043	2985	60043	39372	2275.3	18616	13224	1	4.2044e-36	8.4087e-36	3.817e-35	TRUE
s_35091	CHIC2	2985	60043	2985	60043	39372	2275.3	18616	13224	1	4.2044e-36	8.4087e-36	3.817e-35	TRUE
s_14536	PPIC	18241	529.79	18241	529.79	47858	1924600000	1498.3	13216	1	5.2282e-36	1.0456e-35	4.7409e-34	TRUE
s_34864	FBXW8	69649	162.47	69649	162.47	43592	17278	138.51	13213	1	5.1036e-36	1.0207e-35	4.6307e-34	TRUE
s_03630	COL10A1	24211	752.3	24211	752.3	49011	3931800000	3039.9	13205	1	6.0953e-36	1.2191e-35	5.524e-35	TRUE
s_49329	CHPF	79599	190.72	79599	190.72	44194	23955	191.98	13191	1	6.9275e-36	1.3855e-35	6.2746e-34	TRUE
s_38858	VCX2	16583	31787	16583	31787	36246	628.16	52248	13181	1	7.3595e-36	1.4719e-35	6.6503e-34	TRUE
s_71691	OR5AN1	16583	31787	16583	31787	36246	628.16	52248	13181	1	7.3595e-36	1.4719e-35	6.6503e-34	TRUE
s_18120	SPRR2E	16583	31787	16583	31787	36246	628.16	52248	13181	1	7.3595e-36	1.4719e-35	6.6503e-34	TRUE
s_36735	SAC3D1	16583	31787	16583	31787	36246	628.16	52248	13181	1	7.3595e-36	1.4719e-35	6.6503e-34	TRUE
s_63623	ZNF433	16915	480.34	16915	480.34	47478	1575100000	1241.1	13155	1	1.1663e-35	2.3327e-35	1.0533e-33	TRUE
s_24826	MED23	59699	134.21	59699	134.21	42779	11691	95253	13.14	1	1.3307e-35	2.6614e-35	1.201e-34	TRUE
s_08418	HLA-DQA1	53066	116.55	53066	116.55	42203	8767.9	71707	13137	1	1.3696e-35	2.7391e-35	1.2354e-33	TRUE
s_66418	FBXO33	26533	837.07	26533	837.07	49278	4881900000	3822.9	13109	1	2.1895e-35	4.3791e-35	1.9705e-33	TRUE
s_09898	JAK1	33166	67107	33166	67107	39798	2847.3	23688	13107	1	2.0072e-35	4.0144e-35	1.8074e-33	TRUE
s_73751	FAM25A	33166	67107	33166	67107	39798	2847.3	23688	13107	1	2.0072e-35	4.0144e-35	1.8074e-33	TRUE
s_54330	ZC3H10	33166	67107	33166	67107	39798	2847.3	23688	13107	1	2.0072e-35	4.0144e-35	1.8074e-33	TRUE
s_63660	SYNE4	32503	1077.2	32503	1077.2	50082	8159300000	6355.7	13105	1	2.3537e-35	4.7073e-35	2.117e-34	TRUE
s_18776	TBX6	66332	151.87	66332	151.87	43239	15034	122.99	13096	1	2.3865e-35	4.7731e-35	2.1453e-33	TRUE
s_63275	HSFY2	39136	1356.3	39136	1356.3	50796	13038000000	10125	43356	1	2.8906e-35	5.7811e-35	2.5968e-33	TRUE
s_24563	CER1	10945	279.02	10945	279.02	45511	51975	420.72	43294	1	3.4944e-35	6.9888e-35	3.1375e-33	TRUE
s_66393	UBN2	46433	98894	46433	98894	41458	6265.6	52109	13057	1	3.9414e-35	7.8828e-35	3.5327e-33	TRUE
s_16585	RPS19	46433	98894	46433	98894	41458	6265.6	52109	13057	1	3.9414e-35	7.8828e-35	3.5327e-33	TRUE
s_50154	FAM57A	46433	98894	46433	98894	41458	6265.6	52109	13057	1	3.9414e-35	7.8828e-35	3.5327e-33	TRUE
s_66935	NCR3	26201	819.41	26201	819.41	49146	4670400000	3704.4	13033	1	5.9947e-35	1.1989e-34	5.3699e-33	TRUE
s_24562	CER1	82916	197.79	82916	197.79	44192	25739	212.2	13009	1	7.6415e-35	1.5283e-34	6.8372e-33	TRUE
s_07417	GOLGA3	82916	197.79	82916	197.79	44192	25739	212.2	13009	1	7.6415e-35	1.5283e-34	6.8372e-33	TRUE
s_50729	MAP3K19	36483	74.17	36483	74.17	40154	3483.4	29535	12976	1	1.1108e-34	2.2216e-34	9.9045e-33	TRUE
s_16298	RPL3	36483	74.17	36483	74.17	40154	3483.4	29535	12976	1	1.1108e-34	2.2216e-34	9.9045e-33	TRUE
s_21700	HIST1H3A	36483	74.17	36483	74.17	40154	3483.4	29535	12976	1	1.1108e-34	2.2216e-34	9.9045e-33	TRUE
s_21588	EOMES	36483	74.17	36483	74.17	40154	3483.4	29535	12976	1	1.1108e-34	2.2216e-34	9.9045e-33	TRUE
s_17880	SNRPC	36483	74.17	36483	74.17	40154	3483.4	29535	12976	1	1.1108e-34	2.2216e-34	9.9045e-33	TRUE
s_56254	BBIP1	36483	74.17	36483	74.17	40154	3483.4	29535	12976	1	1.1108e-34	2.2216e-34	9.9045e-33	TRUE
s_32871	GCAT	41458	1444.6	41458	1444.6	50895	14805000000	11699	12972	1	1.3589e-34	2.7178e-34	1.211e-33	TRUE
s_09501	IL12RB1	16915	473.28	16915	473.28	47265	1524600000	1241.1	12954	1	1.6227e-34	3.2454e-34	1.4411e-32	TRUE
s_09160	IDI1	63016	141.28	63016	141.28	42843	12947	108.58	12953	1	1.5517e-34	3.1033e-34	1.3812e-32	TRUE
s_27155	G3BP1	63016	141.28	63016	141.28	42843	12947	108.58	12953	1	1.5517e-34	3.1033e-34	1.3812e-32	TRUE
s_72499	GOLGA7B	56383	123.62	56383	123.62	42306	9860.2	82971	12952	1	1.5598e-34	3.1197e-34	1.3861e-32	TRUE
s_67714	SMIM21	56383	123.62	56383	123.62	42306	9860.2	82971	12952	1	1.5598e-34	3.1197e-34	1.3861e-32	TRUE
s_76306	CT45A7	56383	123.62	56383	123.62	42306	9860.2	82971	12952	1	1.5598e-34	3.1197e-34	1.3861e-32	TRUE
s_40996	DNAAF5	54061	2006.1	54061	2006.1	5188	28869000000	22775	12935	1	2.2326e-34	4.4652e-34	1.9816e-32	TRUE
s_47561	MLST8	13266	349.66	13266	349.66	46194	82204	677.9	33939	1	2.4954e-34	4.9909e-34	2.2136e-32	TRUE
s_71795	OR11H4	69649	158.94	69649	158.94	43277	16454	138.51	12913	1	2.632e-35	5.264e-35	2.3334e-32	TRUE
s_36230	OSTM1	11277	286.09	11277	286.09	45475	54586	452.99	12912	1	2.7519e-34	5.5039e-34	2.4384e-32	TRUE
s_43432	ADAP2	25206	773.49	25206	773.49	48853	4146800000	3362.3	12905	1	3.1643e-34	6.3286e-34	2.8005e-32	TRUE
s_32508	VPS39	13.93	370.85	13.93	370.85	46385	92665	765.3	12902	1	3.1635e-34	6.327e-35	2.8005e-32	TRUE
s_38113	NIN	26865	837.07	26865	837.07	49106	4870600000	3943.6	12902	1	3.3101e-34	6.6201e-34	2.9273e-32	TRUE
s_31205	WDR47	10945	275.49	10945	275.49	45328	50532	420.72	12897	1	3.3113e-34	6.6225e-34	2.9273e-32	TRUE
s_65133	ANO5	29.85	953.62	29.85	953.62	49516	6351100000	5134.4	12892	1	3.7785e-34	7.5571e-34	3.3346e-32	TRUE
s_37513	ASCC1	49749	105.96	49749	105.96	4162	7193.9	61431	12884	1	3.7504e-34	7.5008e-34	3.3117e-32	TRUE
s_50160	TM4SF20	49749	105.96	49749	105.96	4162	7193.9	61431	12884	1	3.7504e-34	7.5008e-34	3.3117e-32	TRUE
s_08533	HMX1	10282	254.3	10282	254.3	45001	42894	360.46	12853	1	5.8896e-34	1.1779e-33	5.1947e-32	TRUE
s_33750	GCA	15256	413.24	15256	413.24	46714	1154700000	959.7	12847	1	6.5136e-34	1.3027e-33	5.7321e-32	TRUE
s_24186	LRRFIP2	39799	81234	39799	81234	40455	4183.7	36196	12841	1	6.499e-35	1.2998e-33	5.7225e-32	TRUE
s_06118	EFEMP1	39799	81234	39799	81234	40455	4183.7	36196	12841	1	6.499e-35	1.2998e-33	5.7225e-32	TRUE
s_26848	AP1M2	39799	81234	39799	81234	40455	4183.7	36196	12841	1	6.499e-35	1.2998e-33	5.7225e-32	TRUE
s_25563	SDC3	45769	1614.1	45769	1614.1	51099	18524000000	14996	12807	1	1.1601e-33	2.3201e-33	1.0203e-31	TRUE
s_53175	MAF1	12272	314.34	12272	314.34	45705	66039	558.61	12781	1	1.5066e-33	3.0132e-33	1.3221e-31	TRUE
s_25956	RNF144A	12272	314.34	12272	314.34	45705	66039	558.61	12781	1	1.5066e-33	3.0132e-33	1.3221e-31	TRUE
s_62409	FAM117B	59699	130.68	59699	130.68	42398	11017	95253	12778	1	1.4886e-33	2.9772e-33	1.3085e-31	TRUE
s_13836	ABCB1	66332	148.34	66332	148.34	42902	14267	122.99	12778	1	1.5054e-33	3.0109e-33	1.3221e-31	TRUE
s_71990	DYTN	19236	547.45	19236	547.45	47603	204700000	1710.7	12771	1	1.7538e-33	3.5077e-33	1.5381e-31	TRUE
s_33878	ABTB2	99.83	4263	99.83	4263	54022	133410000000	1062900000	28460	1	1.9564e-33	3.9127e-33	1.7129e-31	TRUE
s_16269	RP2	11608	293.15	11608	293.15	45441	57261	486.72	12762	1	1.9174e-33	3.8348e-33	1.6797e-31	TRUE
s_49896	MCTP1	13266	24723	13266	24723	34668	376.64	33618	12761	1	1.7798e-33	3.5596e-33	1.5601e-31	TRUE
s_08991	DNAJC4	72966	166	72966	166	43312	17939	155.16	12741	1	2.4317e-33	4.8634e-33	2.1278e-31	TRUE
s_53855	ZNF594	43116	88298	43116	88298	40714	4948.1	43709	12703	1	3.8059e-33	7.6118e-33	3.3228e-31	TRUE
s_07225	GLI3	43116	88298	43116	88298	40714	4948.1	43709	12703	1	3.8059e-33	7.6118e-33	3.3228e-31	TRUE
s_23507	CHRNA6	43116	88298	43116	88298	40714	4948.1	43709	12703	1	3.8059e-33	7.6118e-33	3.3228e-31	TRUE
s_37382	TAS2R9	43116	88298	43116	88298	40714	4948.1	43709	12703	1	3.8059e-33	7.6118e-33	3.3228e-31	TRUE
s_68249	C5orf64	38805	1303.3	38805	1303.3	50342	11972000000	9911	12701	1	4.4547e-33	8.9094e-33	3.887e-32	TRUE
s_62736	TRMT44	27.86	861.79	27.86	861.79	49019	5155600000	4319.6	12688	1	5.1611e-33	1.0322e-32	4.5009e-31	TRUE
s_46773	PLEKHA1	22221	649.87	22221	649.87	48089	2900200000	2453	12673	1	6.2252e-33	1.245e-33	5.4259e-31	TRUE
s_17224	TRA2B	10282	250.77	10282	250.77	44801	41586	360.46	12667	1	6.4152e-33	1.283e-33	5.5883e-31	TRUE
s_38410	THEG	38473	1285.6	38473	1285.6	50266	11639000000	9699.9	12663	1	7.2755e-33	1.4551e-32	6.3342e-31	TRUE
s_57217	ELFN2	23216	685.19	23216	685.19	48246	3229800000	2737	12653	1	7.9826e-33	1.5965e-32	6.9459e-31	TRUE
s_43031	TRMU	99499	240.17	99499	240.17	44611	38059	332.42	12627	1	1.059e-33	2.118e-33	9.2095e-31	TRUE
s_68138	PRRT3	56714	2080.3	56714	2080.3	51724	30982000000	25686	12626	1	1.1864e-32	2.3729e-32	1.0306e-30	TRUE
s_52575	BCO2	31508	999.53	31508	999.53	49438	6968500000	5879.3	12625	1	1.1687e-32	2.3373e-32	1.0157e-30	TRUE
s_33485	GSPT2	63016	137.75	63016	137.75	42481	12237	108.58	12614	1	1.2133e-32	2.4265e-32	1.0527e-30	TRUE
s_73251	PTCHD4	63016	137.75	63016	137.75	42481	12237	108.58	12614	1	1.2133e-32	2.4265e-32	1.0527e-30	TRUE
s_72732	TBC1D3B	40131	1349.2	40131	1349.2	50368	12833000000	10783	12606	1	1.4951e-32	2.9901e-32	1.2958e-30	TRUE
s_42153	TMEM100	11608	289.62	11608	289.62	45267	55747	486.72	12601	1	1.4786e-32	2.9572e-32	1.2822e-30	TRUE
s_14898	MAPK7	16251	437.96	16251	437.96	46693	1295700000	1123.3	12583	1	1.9191e-32	3.8382e-32	1.6624e-30	TRUE
s_12306	NDUFA10	46433	95362	46433	95362	40939	5776.5	52109	12567	1	2.16e-36	4.3199e-32	1.8689e-30	TRUE
s_72558	SOHLH1	46433	95362	46433	95362	40939	5776.5	52109	12567	1	2.16e-36	4.3199e-32	1.8689e-30	TRUE
s_28371	KAT5	10945	268.43	10945	268.43	44954	47709	420.72	12553	1	2.7217e-32	5.4434e-32	2.3537e-30	TRUE
s_14288	PMS2	76282	2991.5	76282	2991.5	52751	64796000000	54073	12537	1	3.7367e-32	7.4733e-32	3.2296e-30	TRUE
s_75737	GPR75-ASB3	13266	339.06	13266	339.06	45751	76806	677.9	12513	1	4.5541e-32	9.1083e-32	3.9339e-30	TRUE
s_13116	SLC22A18AS	15588	413.24	15588	413.24	46422	1149700000	1012.5	12497	1	5.6454e-32	1.1291e-31	4.8738e-30	TRUE
s_04367	CYP2C19	38473	1268	38473	1268	50066	11293000000	9699.9	12484	1	7.0322e-32	1.4064e-31	6.0678e-30	TRUE
s_73674	FAM110C	66332	144.81	66332	144.81	42556	13522	122.99	12459	1	8.5855e-32	1.7171e-31	7.4039e-30	TRUE
s_02918	CDK7	89549	208.38	89549	208.38	43946	28419	256.39	12455	1	9.2383e-32	1.8477e-31	7.958e-31	TRUE
s_03052	CETN1	89549	208.38	89549	208.38	43946	28419	256.39	12455	1	9.2383e-32	1.8477e-31	7.958e-31	TRUE
s_24846	QKI	99.83	4157.1	99.83	4157.1	53659	126350000000	1062900000	12445	1	1.2076e-31	2.4152e-31	1.0391e-29	TRUE
s_31858	DCUN1D4	49749	102.43	49749	102.43	41135	6669.1	61431	12434	1	1.1661e-31	2.3323e-31	1.004e-30	TRUE
s_28255	CAP2	2985	56511	2985	56511	38512	1985.8	18616	12406	1	1.6107e-31	3.2213e-31	1.3805e-29	TRUE
s_41309	C19orf24	2985	56511	2985	56511	38512	1985.8	18616	12406	1	1.6107e-31	3.2213e-31	1.3805e-29	TRUE
s_43801	C20orf24	2985	56511	2985	56511	38512	1985.8	18616	12406	1	1.6107e-31	3.2213e-31	1.3805e-29	TRUE
s_50966	PAAF1	2985	56511	2985	56511	38512	1985.8	18616	12406	1	1.6107e-31	3.2213e-31	1.3805e-29	TRUE
s_12320	NDUFB2	2985	56511	2985	56511	38512	1985.8	18616	12406	1	1.6107e-31	3.2213e-31	1.3805e-29	TRUE
s_00815	SLC25A5	2985	56511	2985	56511	38512	1985.8	18616	12406	1	1.6107e-31	3.2213e-31	1.3805e-29	TRUE
s_27632	SAP18	2985	56511	2985	56511	38512	1985.8	18616	12406	1	1.6107e-31	3.2213e-31	1.3805e-29	TRUE
s_67315	ZNF740	26533	49447	26533	49447	37875	1513.6	14278	12384	1	2.1104e-31	4.2208e-31	1.8049e-29	TRUE
s_11484	MICB	26533	49447	26533	49447	37875	1513.6	14278	12384	1	2.1104e-31	4.2208e-31	1.8049e-29	TRUE
s_02799	CDC6	26533	49447	26533	49447	37875	1513.6	14278	12384	1	2.1104e-31	4.2208e-31	1.8049e-29	TRUE
s_53789	TMEM185A	26533	49447	26533	49447	37875	1513.6	14278	12384	1	2.1104e-31	4.2208e-31	1.8049e-29	TRUE
s_14567	PPP1CB	33166	63575	33166	63575	3903	2522.1	23688	12381	1	2.2047e-31	4.4094e-31	1.8783e-29	TRUE
s_11052	MAGEB3	33166	63575	33166	63575	3903	2522.1	23688	12381	1	2.2047e-31	4.4094e-31	1.8783e-29	TRUE
s_16603	RPS24	33166	63575	33166	63575	3903	2522.1	23688	12381	1	2.2047e-31	4.4094e-31	1.8783e-29	TRUE
s_27930	NOD1	33166	63575	33166	63575	3903	2522.1	23688	12381	1	2.2047e-31	4.4094e-31	1.8783e-29	TRUE
s_63642	EID2	33166	63575	33166	63575	3903	2522.1	23688	12381	1	2.2047e-31	4.4094e-31	1.8783e-29	TRUE
s_14281	EXOSC10	33166	63575	33166	63575	3903	2522.1	23688	12381	1	2.2047e-31	4.4094e-31	1.8783e-29	TRUE
s_71260	C2orf80	33166	63575	33166	63575	3903	2522.1	23688	12381	1	2.2047e-31	4.4094e-31	1.8783e-29	TRUE
s_72734	TBC1D3C	31176	967.75	31176	967.75	49121	6505800000	5725.4	12378	1	2.6187e-31	5.2374e-31	2.2297e-29	TRUE
s_19215	TIMP4	12603	314.34	12603	314.34	45349	65672	596.83	12351	1	3.447e-32	6.894e-32	2.9334e-29	TRUE
s_57593	TSR3	36483	70638	36483	70638	3946	3122.5	29535	12327	1	4.3501e-31	8.7003e-31	3.6898e-29	TRUE
s_67426	C14orf178	36483	70638	36483	70638	3946	3122.5	29535	12327	1	4.3501e-31	8.7003e-31	3.6898e-29	TRUE
s_66102	SPDYA	36483	70638	36483	70638	3946	3122.5	29535	12327	1	4.3501e-31	8.7003e-31	3.6898e-29	TRUE
s_59650	C22orf39	36483	70638	36483	70638	3946	3122.5	29535	12327	1	4.3501e-31	8.7003e-31	3.6898e-29	TRUE
s_23346	MTMR2	36483	70638	36483	70638	3946	3122.5	29535	12327	1	4.3501e-31	8.7003e-31	3.6898e-29	TRUE
s_64390	KRT78	36483	70638	36483	70638	3946	3122.5	29535	12327	1	4.3501e-31	8.7003e-31	3.6898e-29	TRUE
s_39735	PCBP3	17.91	483.87	17.91	483.87	46804	1582600000	1431.2	12317	1	5.3911e-31	1.0782e-30	4.5652e-29	TRUE
s_25872	KMT2B	69649	151.87	69649	151.87	42625	14871	138.51	12313	1	5.3513e-31	1.0703e-30	4.534e-30	TRUE
s_22464	CDK13	69649	151.87	69649	151.87	42625	14871	138.51	12313	1	5.3513e-31	1.0703e-30	4.534e-30	TRUE
s_47047	BCAN	92865	215.45	92865	215.45	43952	30360	280.41	12312	1	5.5274e-31	1.1055e-30	4.6781e-29	TRUE
s_03970	CRYGA	76282	169.53	76282	169.53	43048	18613	172.97	11658	1	5.5463e-31	1.1093e-30	4.6915e-29	TRUE
s_10217	KLKB1	25.87	762.9	25.87	762.9	48293	4003500000	3588.1	12304	1	6.4519e-31	1.2904e-30	5.4457e-29	TRUE
s_74175	C7orf73	53066	109.49	53066	109.49	41309	7625.8	71707	12303	1	5.9296e-31	1.1859e-30	5.0075e-29	TRUE
s_32036	MDN1	53066	109.49	53066	109.49	41309	7625.8	71707	12303	1	5.9296e-31	1.1859e-30	5.0075e-29	TRUE
s_50450	NOL10	53066	109.49	53066	109.49	41309	7625.8	71707	12303	1	5.9296e-31	1.1859e-30	5.0075e-29	TRUE
s_25995	SERTAD2	23216	42383	23216	42383	37072	1105.5	10632	12286	1	7.027e-32	1.4054e-30	5.9214e-29	TRUE
s_57000	TEX261	23216	42383	23216	42383	37072	1105.5	10632	12286	1	7.027e-32	1.4054e-30	5.9214e-29	TRUE
s_07940	GTF2E2	23216	42383	23216	42383	37072	1105.5	10632	12286	1	7.027e-32	1.4054e-30	5.9214e-29	TRUE
s_25011	SLC4A7	63016	134.21	63016	134.21	42109	11548	108.58	12275	1	8.4628e-31	1.6926e-30	7.1274e-29	TRUE
s_41875	PBRM1	18905	515.66	18905	515.66	4698	1800900000	1638	12274	1	9.1832e-31	1.8366e-30	7.7299e-29	TRUE
s_36288	FLVCR1	39799	77702	39799	77702	39822	3787	36196	12254	1	1.0762e-30	2.1524e-30	9.049e-30	TRUE
s_52195	NUF2	39799	77702	39799	77702	39822	3787	36196	12254	1	1.0762e-30	2.1524e-30	9.049e-30	TRUE
s_75011	SHISA7	20895	582.77	20895	582.77	47367	2310500000	2103.2	12252	1	1.2161e-30	2.4323e-30	1.022e-29	TRUE
s_09253	IFNAR1	33166	1034.9	33166	1034.9	49221	7446800000	6685.8	12251	1	1.269e-31	2.5381e-30	1.0659e-28	TRUE
s_33166	SNAPIN	42121	1391.6	42121	1391.6	50132	13609000000	12175	45261	1	1.6551e-30	3.3102e-30	1.3894e-28	TRUE
s_53882	TNRC18	17.91	480.34	17.91	480.34	46699	1557200000	1431.2	12223	1	1.7078e-30	3.4156e-30	1.4329e-28	TRUE
s_60733	FOXR2	20231	558.04	20231	558.04	47187	2113900000	1940.3	12209	1	2.0443e-30	4.0886e-30	1.7133e-28	TRUE
s_13584	PDE6B	10945	261.36	10945	261.36	44571	44972	420.72	12209	1	1.9883e-30	3.9766e-30	1.6673e-28	TRUE
s_25908	JADE3	21.89	614.55	21.89	614.55	47491	2572900000	2362.5	12193	1	2.5037e-30	5.0074e-30	2.0972e-28	TRUE
s_05344	EFNA3	31176	953.62	31176	953.62	48909	6299800000	5725.4	12191	1	2.6345e-30	5.2689e-30	2.2056e-28	TRUE
s_67410	GPR137C	33498	1041.9	33498	1041.9	4918	7544400000	6854.7	43435	1	3.0216e-30	6.0432e-30	2.5215e-28	TRUE
s_06170	FCGRT	56383	116.55	56383	116.55	41464	8646.6	82971	12177	1	2.8261e-30	5.6521e-30	2.3622e-28	TRUE
s_23133	GMPS	56383	116.55	56383	116.55	41464	8646.6	82971	12177	1	2.8261e-30	5.6521e-30	2.3622e-28	TRUE
s_14616	PPP2R1A	56383	116.55	56383	116.55	41464	8646.6	82971	12177	1	2.8261e-30	5.6521e-30	2.3622e-28	TRUE
s_46103	MYH7B	72966	158.94	72966	158.94	42688	16283	155.16	12174	1	2.9748e-30	5.9497e-30	2.4838e-28	TRUE
s_22815	GBF1	72966	158.94	72966	158.94	42688	16283	155.16	12174	1	2.9748e-30	5.9497e-30	2.4838e-28	TRUE
s_12184	HNRNPM	43116	84766	43116	84766	40132	4515.6	43709	12169	1	3.0498e-30	6.0996e-30	2.5409e-28	TRUE
s_11500	MIP	43116	84766	43116	84766	40132	4515.6	43709	12169	1	3.0498e-30	6.0996e-30	2.5409e-28	TRUE
s_02765	ADGRE5	43116	84766	43116	84766	40132	4515.6	43709	12169	1	3.0498e-30	6.0996e-30	2.5409e-28	TRUE
s_41690	ANKZF1	21226	589.83	21226	589.83	47324	2365100000	2187.6	12157	1	3.9013e-30	7.8026e-30	3.2486e-28	TRUE
s_76347	CCDC182	16915	445.02	16915	445.02	46379	1331300000	1241.1	12152	1	4.0768e-30	8.1536e-30	3.3929e-28	TRUE
s_40367	TBC1D13	66332	141.28	66332	141.28	42203	12797	122.99	12141	1	4.4269e-30	8.8538e-30	3.6783e-28	TRUE
s_72287	DEFB132	66332	141.28	66332	141.28	42203	12797	122.99	12141	1	4.4269e-30	8.8538e-30	3.6783e-28	TRUE
s_32093	ZC3H4	66332	141.28	66332	141.28	42203	12797	122.99	12141	1	4.4269e-30	8.8538e-30	3.6783e-28	TRUE
s_09187	SP110	44774	1490.5	44774	1490.5	50261	15634000000	14191	12136	1	5.2817e-30	1.0563e-29	4.3863e-28	TRUE
s_26315	SMG7	17.91	476.81	17.91	476.81	46592	1532100000	1431.2	41609	1	5.3634e-30	1.0727e-29	4.4517e-28	TRUE
s_54834	TRIM5	29518	886.51	29518	886.51	4862	5425300000	4992.7	12129	1	5.6302e-30	1.126e-30	4.6707e-28	TRUE
s_22873	ADAM21	53066	1840.1	53066	1840.1	50897	24005000000	21737	12121	1	6.3859e-30	1.2772e-29	5.2948e-28	TRUE
s_19214	TIMP4	13266	328.47	13266	328.47	45294	71599	677.9	12106	1	7.0499e-30	1.41e-33	5.8422e-28	TRUE
s_11960	MX2	34493	1073.7	34493	1073.7	49203	801300000	7376.5	43112	1	8.0679e-30	1.6136e-29	6.6822e-28	TRUE
s_41156	C1orf56	36161	35319	36161	35319	36025	761.5	76302	12066	1	1.0466e-29	2.0931e-29	8.6635e-28	TRUE
s_22753	TNK1	19568	526.26	19568	526.26	24929	1870300000	1785.3	11992	1	2.8888e-29	5.7776e-29	2.3901e-27	TRUE
s_05282	EDN2	49749	98894	49749	98894	40634	6165.1	61431	11983	1	2.9634e-29	5.9268e-29	2.4492e-27	TRUE
s_65865	SMIM13	49749	98894	49749	98894	40634	6165.1	61431	11983	1	2.9634e-29	5.9268e-29	2.4492e-27	TRUE
s_09370	IKBKB	28191	826.47	28191	826.47	48251	4693400000	4449.5	11967	1	3.9702e-29	7.9405e-29	3.2796e-27	TRUE
s_25465	MICAL2	63016	130.68	63016	130.68	41727	10880	108.58	11936	1	5.2662e-29	1.0532e-28	4.3478e-27	TRUE
s_45300	VANGL2	47759	1589.4	47759	1589.4	50275	17777000000	16686	11934	1	6.0916e-29	1.2183e-28	5.0265e-27	TRUE
s_07156	GJA5	26201	752.3	26201	752.3	47915	3872900000	3704.4	34274	1	6.1975e-29	1.2395e-28	5.1112e-27	TRUE
s_09518	IL13RA2	10282	236.64	10282	236.64	43967	36566	360.46	11922	1	6.4025e-29	1.2805e-28	5.2774e-27	TRUE
s_53741	ZC3H8	86232	190.72	86232	190.72	43164	23536	233.66	11913	1	7.0963e-29	1.4193e-28	5.8431e-27	TRUE
s_30796	CBX3	86232	190.72	86232	190.72	43164	23536	233.66	11913	1	7.0963e-29	1.4193e-28	5.8431e-27	TRUE
s_08369	HK3	30513	907.7	30513	907.7	48498	5677500000	5425.1	11909	1	7.9997e-29	1.5999e-28	6.5834e-27	TRUE
s_52347	MS4A8	72966	155.4	72966	155.4	42366	15487	155.16	32813	1	9.23e-33	1.846e-29	7.5919e-27	TRUE
s_07153	GJA5	53066	105.96	53066	105.96	4084	7086	71707	11886	1	9.5197e-29	1.9039e-28	7.826e-28	TRUE
s_52895	FBXO30	17.91	466.21	17.91	466.21	46269	145800000	1431.2	31352	1	1.5771e-28	3.1543e-28	1.2959e-26	TRUE
s_20587	ZNF69	21558	586.3	21558	586.3	47024	2326800000	2274	11843	1	1.7411e-28	3.4823e-28	1.4283e-26	TRUE
s_27768	AKR1A1	62684	2214.5	62684	2214.5	51206	34881000000	33025	11841	1	1.8859e-28	3.7718e-28	1.5463e-26	TRUE
s_35157	OR10G2	0.99499	17.66	0.99499	17.66	32255	189.21	19824	11836	1	1.6774e-28	3.3547e-28	1.3768e-26	TRUE
s_25336	NFE2L3	0.99499	17.66	0.99499	17.66	32255	189.21	19824	11836	1	1.6774e-28	3.3547e-28	1.3768e-26	TRUE
s_02750	CD74	2251	1958500000	2251	1958500000	64424	309250000000000	2677900000000	11831	1	2.4465e-28	4.8931e-28	2.0028e-26	TRUE
s_12261	NDP	64343	2285.2	64343	2285.2	51288	37177000000	35263	11826	1	2.2466e-28	4.4931e-28	1.841e-27	TRUE
s_28466	AGPAT1	32503	974.81	32503	974.81	48642	6558400000	6355.7	30256	1	2.3418e-28	4.6837e-28	1.9181e-26	TRUE
s_16884	SCN2A	42784	1370.4	42784	1370.4	49691	13123000000	12661	11798	1	3.0662e-28	6.1323e-28	2.5087e-26	TRUE
s_30050	HSF2BP	44111	1423.4	44111	1423.4	49807	14177000000	13670	11797	1	3.1319e-28	6.2639e-28	2.5611e-26	TRUE
s_57911	SH2D1B	45438	1476.3	45438	1476.3	49916	15271000000	14725	11792	1	3.3229e-28	6.6458e-28	2.7144e-26	TRUE
s_46717	CARD18	20895	561.58	20895	561.58	46834	2129600000	2103.2	29160	1	3.2644e-28	6.5288e-28	2.6681e-26	TRUE
s_58672	DCUN1D3	11277	261.36	11277	261.36	44176	44680	452.99	27699	1	5.0216e-28	1.0043e-27	4.0999e-26	TRUE
s_29429	WDR3	16583	420.3	16583	420.3	45826	1178300000	1181.3	11746	1	5.3853e-28	1.0771e-27	4.3946e-26	TRUE
s_49422	ARMT1	26533	752.3	26533	752.3	4774	3863400000	3822.9	11738	1	6.0933e-28	1.2187e-27	4.9671e-26	TRUE
s_34962	AK5	12272	289.62	12272	289.62	44527	55087	558.61	11735	1	6.0699e-28	1.214e-28	4.9506e-26	TRUE
s_43748	NKRF	69649	144.81	69649	144.81	41943	13371	138.51	11712	1	7.6063e-28	1.5213e-27	6.1972e-26	TRUE
s_43189	ZFP64	40463	1268	40463	1268	49357	11189000000	11008	43292	1	9.8493e-28	1.9699e-27	8.0204e-26	TRUE
s_64492	UBR1	30845	904.17	30845	904.17	48291	5617500000	5574.1	11697	1	9.9441e-28	1.9888e-27	8.0934e-26	TRUE
s_08299	CFH	74624	2719.6	74624	2719.6	51689	52892000000	51169	11693	1	1.1034e-27	2.2069e-27	8.9759e-26	TRUE
s_65232	OR4C16	34493	1038.4	34493	1038.4	48721	7447200000	7376.5	11689	1	1.1113e-27	2.2225e-27	9.035e-27	TRUE
s_53709	GHDC	92865	204.85	92865	204.85	43228	27139	280.41	11679	1	1.152e-28	2.3039e-27	9.351e-27	TRUE
s_13822	PGM3	36483	67107	36483	67107	3873	2782.2	29535	11677	1	1.1197e-27	2.2394e-27	9.0941e-26	TRUE
s_30200	POLR3A	36483	67107	36483	67107	3873	2782.2	29535	11677	1	1.1197e-27	2.2394e-27	9.0941e-26	TRUE
s_03576	COL4A4	34825	1049	34825	1049	48733	7600800000	7555.6	11667	1	1.4282e-27	2.8564e-27	1.1557e-25	TRUE
s_36251	C11orf54	39799	74.17	39799	74.17	3916	3411	36196	11667	1	1.2654e-27	2.5308e-27	1.025e-26	TRUE
s_24639	ZFYVE9	39799	74.17	39799	74.17	3916	3411	36196	11667	1	1.2654e-27	2.5308e-27	1.025e-26	TRUE
s_05254	ECM1	39799	74.17	39799	74.17	3916	3411	36196	11667	1	1.2654e-27	2.5308e-27	1.025e-26	TRUE
s_14379	POLR2E	39799	74.17	39799	74.17	3916	3411	36196	11667	1	1.2654e-27	2.5308e-27	1.025e-26	TRUE
s_05179	DUT	79599	169.53	79599	169.53	42504	18434	191.98	11661	1	1.4032e-27	2.8065e-27	1.1361e-25	TRUE
s_06244	FGF3	43448	1381	43448	1381	49585	13308000000	13160	24412	1	1.5841e-27	3.1682e-27	1.2765e-25	TRUE
s_76285	C7orf55-LUC7L2	33166	60043	33166	60043	38218	2217.6	23688	11655	1	1.435e-28	2.87e-31	1.157e-26	TRUE
s_00335	ADH1A	33166	60043	33166	60043	38218	2217.6	23688	11655	1	1.435e-28	2.87e-31	1.157e-26	TRUE
s_16486	RPS2	33166	60043	33166	60043	38218	2217.6	23688	11655	1	1.435e-28	2.87e-31	1.157e-26	TRUE
s_70960	LOC388282	33166	60043	33166	60043	38218	2217.6	23688	11655	1	1.435e-28	2.87e-31	1.157e-26	TRUE
s_09027	HTR1E	33166	60043	33166	60043	38218	2217.6	23688	11655	1	1.435e-28	2.87e-31	1.157e-26	TRUE
s_40037	FAM64A	33166	60043	33166	60043	38218	2217.6	23688	11655	1	1.435e-28	2.87e-31	1.157e-26	TRUE
s_05714	EPRS	33166	60043	33166	60043	38218	2217.6	23688	11655	1	1.435e-28	2.87e-31	1.157e-26	TRUE
s_64252	ANKRD24	22885	621.62	22885	621.62	47042	2615100000	2640.3	11652	1	1.6621e-27	3.3242e-27	1.3387e-25	TRUE
s_26846	AP1M2	34493	1034.9	34493	1034.9	48671	7391800000	7376.5	11647	1	1.8018e-27	3.6037e-27	1.4482e-25	TRUE
s_19682	DNAJC7	11608	268.43	11608	268.43	44175	47105	486.72	11641	1	1.8213e-27	3.6427e-27	1.4631e-25	TRUE
s_41030	TMEM161A	16583	28255	16583	28255	34601	481.57	52248	11636	1	1.7668e-27	3.5336e-27	1.4208e-25	TRUE
s_41117	FAM120C	16583	28255	16583	28255	34601	481.57	52248	11636	1	1.7668e-27	3.5336e-27	1.4208e-25	TRUE
s_14731	PREP	16583	28255	16583	28255	34601	481.57	52248	11636	1	1.7668e-27	3.5336e-27	1.4208e-25	TRUE
s_68148	C3orf70	25206	699.32	25206	699.32	27120	3323900000	3362.3	11626	1	2.2836e-27	4.5672e-27	1.8335e-25	TRUE
s_27142	AKAP9	15.92	395.58	15.92	395.58	45508	1039400000	1067	11623	1	2.3016e-27	4.6031e-27	1.847e-26	TRUE
s_53618	LZTS2	23.88	653.41	23.88	653.41	47171	2893700000	2936.8	11616	1	2.5346e-27	5.0693e-27	2.033e-26	TRUE
s_57017	HELQ	72966	151.87	72966	151.87	42037	14712	155.16	11607	1	2.644e-28	5.288e-28	2.1196e-25	TRUE
s_41024	IMPAD1	63016	127.15	63016	127.15	41335	10233	108.58	11597	1	2.9237e-27	5.8474e-27	2.3426e-25	TRUE
s_74018	TMEM191C	46433	88298	46433	88298	3984	4860.9	52109	11589	1	3.1775e-27	6.355e-28	2.5394e-25	TRUE
s_01332	ATP1A1	46433	88298	46433	88298	3984	4860.9	52109	11589	1	3.1775e-27	6.355e-28	2.5394e-25	TRUE
s_67238	OR8B4	2985	52979	2985	52979	37598	1717	18616	11587	1	3.1704e-27	6.3408e-27	2.5363e-25	TRUE
s_44896	UTP3	2985	52979	2985	52979	37598	1717	18616	11587	1	3.1704e-27	6.3408e-27	2.5363e-25	TRUE
s_28336	MYBBP1A	2985	52979	2985	52979	37598	1717	18616	11587	1	3.1704e-27	6.3408e-27	2.5363e-25	TRUE
s_11698	MPI	45769	1458.7	45769	1458.7	49639	14855000000	14996	11538	1	6.5756e-27	1.3151e-26	5.2497e-25	TRUE
s_63244	AWAT2	49749	95362	49749	95362	40115	5681.9	61431	11532	1	6.1549e-27	1.231e-27	4.9164e-25	TRUE
s_32337	ADGRL3	76282	158.94	76282	158.94	42123	16118	172.97	11505	1	8.6944e-27	1.7389e-26	6.9377e-25	TRUE
s_38265	TBC1D7	66332	134.21	66332	134.21	41468	11411	122.99	11504	1	8.6994e-27	1.7399e-26	6.9381e-25	TRUE
s_57376	TSGA13	66996	2338.1	66996	2338.1	51044	38802000000	39029	11496	1	1.0906e-26	2.1813e-26	8.6938e-25	TRUE
s_10899	LYL1	53066	102.43	53066	102.43	40356	6567.1	71707	11469	1	1.2858e-26	2.5716e-26	1.0234e-24	TRUE
s_67799	KLK9	53066	102.43	53066	102.43	40356	6567.1	71707	11469	1	1.2858e-26	2.5716e-26	1.0234e-24	TRUE
s_65370	GJD4	53066	102.43	53066	102.43	40356	6567.1	71707	11469	1	1.2858e-26	2.5716e-26	1.0234e-24	TRUE
s_28898	B3GNT2	92865	201.32	92865	201.32	42978	26107	280.41	11468	1	1.347e-27	2.694e-27	1.0715e-24	TRUE
s_49714	GTDC1	26533	45915	26533	45915	36828	1280.5	14278	11449	1	1.5678e-26	3.1355e-26	1.2427e-24	TRUE
s_42488	MCM10	26533	45915	26533	45915	36828	1280.5	14278	11449	1	1.5678e-26	3.1355e-26	1.2427e-24	TRUE
s_20844	ZNF217	26533	45915	26533	45915	36828	1280.5	14278	11449	1	1.5678e-26	3.1355e-26	1.2427e-24	TRUE
s_44308	BCCIP	26533	45915	26533	45915	36828	1280.5	14278	11449	1	1.5678e-26	3.1355e-26	1.2427e-24	TRUE
s_11728	MPV17	26533	45915	26533	45915	36828	1280.5	14278	11449	1	1.5678e-26	3.1355e-26	1.2427e-24	TRUE
s_07687	GRB2	26533	45915	26533	45915	36828	1280.5	14278	11449	1	1.5678e-26	3.1355e-26	1.2427e-24	TRUE
s_04910	DNASE1L3	26533	45915	26533	45915	36828	1280.5	14278	11449	1	1.5678e-26	3.1355e-26	1.2427e-24	TRUE
s_57345	C1QTNF6	69649	141.28	69649	141.28	41589	12652	138.51	11412	1	2.5076e-26	5.0153e-26	1.9866e-24	TRUE
s_58117	LYZL2	79599	166	79599	166	42202	17587	191.98	11406	1	2.7129e-26	5.4259e-26	2.1471e-24	TRUE
s_09542	IL18	79599	166	79599	166	42202	17587	191.98	11406	1	2.7129e-26	5.4259e-26	2.1471e-24	TRUE
s_15919	RBM4	56383	109.49	56383	109.49	4057	7516.4	82971	11401	1	2.8171e-26	5.6342e-26	2.2272e-24	TRUE
s_48312	MRPL41	56383	109.49	56383	109.49	4057	7516.4	82971	11401	1	2.8171e-26	5.6342e-26	2.2272e-24	TRUE
s_31744	FSTL4	18573	469.75	18573	469.75	4588	1471300000	1567.2	11397	1	3.1883e-26	6.3765e-26	2.5194e-24	TRUE
s_30473	FZD10	12935	300.21	12935	300.21	4434	58977	636.58	11386	1	3.5232e-26	7.0464e-26	2.7827e-24	TRUE
s_68366	SCARA5	45769	1437.5	45769	1437.5	49428	14388000000	14996	11365	1	4.8421e-26	9.6843e-26	3.8166e-24	TRUE
s_22727	B4GALT3	15256	367.32	15256	367.32	45019	89013	959.7	11365	1	4.5557e-26	9.1113e-26	3.5963e-24	TRUE
s_51858	VMP1	29.85	844.13	29.85	844.13	47758	4861800000	5134.4	11364	1	4.7813e-26	9.5626e-26	3.7706e-24	TRUE
s_38382	GMIP	23548	628.68	23548	628.68	46809	2665500000	2835.8	11363	1	4.7386e-26	9.4771e-26	3.7388e-24	TRUE
s_06599	CENPI	72966	148.34	72966	148.34	41699	13958	155.16	11323	1	6.9928e-26	1.3986e-25	5.5061e-24	TRUE
s_57802	MRGPRF	72966	148.34	72966	148.34	41699	13958	155.16	11323	1	6.9928e-26	1.3986e-25	5.5061e-24	TRUE
s_14696	PPT1	82916	173.06	82916	173.06	42276	19121	212.2	11311	1	8.0567e-26	1.6113e-25	6.3407e-24	TRUE
s_31943	SLC35D1	12272	279.02	12272	279.02	43991	50710	558.61	11286	1	1.0988e-25	2.1975e-25	8.6385e-24	TRUE
s_43301	IFT122	12272	279.02	12272	279.02	43991	50710	558.61	11286	1	1.0988e-25	2.1975e-25	8.6385e-24	TRUE
s_56466	PIGM	14261	335.53	14261	335.53	44628	73898	811.42	11278	1	1.2118e-25	2.4236e-25	9.5224e-24	TRUE
s_70698	KRTAP12-4	24543	656.94	24543	656.94	4687	2912100000	3145.2	11276	1	1.2847e-25	2.5694e-25	1.009e-24	TRUE
s_45612	ODF2L	10613	233.11	10613	233.11	43333	35113	389.89	11268	1	1.3393e-25	2.6787e-25	1.0508e-23	TRUE
s_53470	CCDC77	10613	233.11	10613	233.11	43333	35113	389.89	11268	1	1.3393e-25	2.6787e-25	1.0508e-23	TRUE
s_02712	CD47	52071	1674.1	52071	1674.1	49802	1.96e+06	20729	11266	1	1.5014e-25	3.0028e-25	1.1768e-23	TRUE
s_56490	HAUS8	63016	123.62	63016	123.62	40932	9607.3	108.58	11258	1	1.4482e-25	2.8964e-25	1.1357e-23	TRUE
s_30516	MST1L	21.89	568.64	21.89	568.64	46373	2168400000	2362.5	11249	1	1.7445e-25	3.4891e-25	1.3667e-23	TRUE
s_29203	CYSLTR1	38805	1158.5	38805	1158.5	48644	9254900000	9911	11247	1	1.8415e-25	3.683e-26	1.4412e-23	TRUE
s_71627	OR4X1	22221	579.24	22221	579.24	46431	2251500000	2453	11246	1	1.791e-26	3.5821e-25	1.4024e-23	TRUE
s_25544	SAFB2	76282	155.4	76282	155.4	41801	15328	172.97	11236	1	1.8856e-25	3.7712e-25	1.475e-24	TRUE
s_55173	KLHL6	86232	180.13	86232	180.13	42343	20719	233.66	44866	1	2.2838e-25	4.5675e-25	1.7855e-23	TRUE
s_03728	COX7A1	29.85	833.53	29.85	833.53	47576	4728700000	5134.4	11216	1	2.5715e-25	5.1431e-25	2.0042e-23	TRUE
s_22388	SCARF1	23216	38851	23216	38851	35847	908.07	10632	11203	1	2.579e-26	5.158e-26	2.0042e-23	TRUE
s_15282	PSMD13	23216	38851	23216	38851	35847	908.07	10632	11203	1	2.579e-26	5.158e-26	2.0042e-23	TRUE
s_25807	SETD1A	23216	38851	23216	38851	35847	908.07	10632	11203	1	2.579e-26	5.158e-26	2.0042e-23	TRUE
s_72920	GOLGA6L9	23216	38851	23216	38851	35847	908.07	10632	11203	1	2.579e-26	5.158e-26	2.0042e-23	TRUE
s_11989	MYBPH	23216	38851	23216	38851	35847	908.07	10632	11203	1	2.579e-26	5.158e-26	2.0042e-23	TRUE
s_49505	AKIRIN1	23216	38851	23216	38851	35847	908.07	10632	11203	1	2.579e-26	5.158e-26	2.0042e-23	TRUE
s_45419	SPC25	23216	38851	23216	38851	35847	908.07	10632	11203	1	2.579e-26	5.158e-26	2.0042e-23	TRUE
s_20787	ZNF189	23216	38851	23216	38851	35847	908.07	10632	11203	1	2.579e-26	5.158e-26	2.0042e-23	TRUE
s_73940	PPIAL4G	23216	38851	23216	38851	35847	908.07	10632	11203	1	2.579e-26	5.158e-26	2.0042e-23	TRUE
s_32713	EXOSC2	23216	38851	23216	38851	35847	908.07	10632	11203	1	2.579e-26	5.158e-26	2.0042e-23	TRUE
s_76317	LOC101060321	23216	38851	23216	38851	35847	908.07	10632	11203	1	2.579e-26	5.158e-26	2.0042e-23	TRUE
s_71412	LAMTOR4	13598	314.34	13598	314.34	44331	64604	720.8	11202	1	2.8786e-25	5.7572e-25	2.2359e-23	TRUE
s_37591	DESI2	66332	130.68	66332	130.68	41086	10749	122.99	11185	1	3.3158e-25	6.6316e-25	2.5716e-23	TRUE
s_48217	CDCP1	66332	130.68	66332	130.68	41086	10749	122.99	11185	1	3.3158e-25	6.6316e-25	2.5716e-23	TRUE
s_12053	MYH10	66332	130.68	66332	130.68	41086	10749	122.99	11185	1	3.3158e-25	6.6316e-25	2.5716e-23	TRUE
s_55560	STARD13	35.82	1041.9	35.82	1041.9	4824	7448600000	8108.6	11173	1	4.224e-26	8.4479e-25	3.2744e-23	TRUE
s_38346	ANKMY1	34161	981.87	34161	981.87	4805	6599400000	7200	11169	1	4.4092e-25	8.8184e-25	3.4145e-23	TRUE
[truncated: 75,442 more rows]

## Sheet: CRISPR Screen_count_normalized
sgRNA	Gene	control_2	survivor_2
s_20660	ZNF131	37146197652	0.0
s_61832	ZNF548	74624057783	953619581449
s_76394	AK6	663324958071	0.0
s_65794	LRRC73	132664991614	0.0
s_17680	SLC20A1	461010845859	0.0
s_19950	UGP2	202314112212	247234706302
s_11492	MIF	344928978197	173064294411
s_64085	QSOX2	361512102149	120085428775
s_47749	TMEM168	354878852568	0.0
s_33472	PRKD3	268646608019	247234706302
s_19590	TRIP6	149248115566	0.0
s_33775	TTLL1	696491205975	0.0
s_24364	ITGB1BP1	497493718553	706384875147
s_24374	BCL7B	102815368501	882981093934
s_14537	PPID	527343341667	105957731272
s_70253	NHLRC2	447744346698	130681201902
s_42591	ASIC4	683224706813	151872748157
s_61495	HAPLN3	397994974843	0.0
s_52024	FAHD1	729657453878	847661850177
s_76211	LOC100652758	112765242872	423830925088
s_63942	PAPD4	248746859277	494469412603
s_47952	SMYD3	384728475681	211915462544
s_40905	NSUN2	152564740356	144808899405
s_41474	TMEM248	255380108857	0.0
s_32910	BRD4	18241436347	0.0
s_48055	GINS3	338295728616	176596218787
s_08228	HCCS	55719296478	494469412603
s_59978	TMEM42	155881365147	0.0
s_43633	CBWD1	129348366824	0.0
s_67266	CRACR2B	663324958071	0.0
s_74496	RGPD8	252063484067	0.0
s_32409	ICOSLG	696491205975	0.0
s_18767	TBX2	325029229455	353192437574
s_09643	INPPL1	397994974843	282553950059
s_61228	PIWIL4	427844597956	0.0
s_14609	PPP2CB	65005845891	120085428775
s_25887	MLEC	122715117243	282553950059
s_69832	CCDC160	925338316509	918300337691
s_54359	AIFM2	232163735325	953619581449
s_29595	EHD1	341612353407	0.0
s_57759	GRIN3A	358195477358	918300337691
s_03946	CRYBA1	255380108857	600427143875
s_23832	PIGQ	248746859277	741704118905
s_57295	OSBPL1A	47096072023	494469412603
s_35762	SIGLEC9	159197989937	0.0
s_70329	LRRC37A3	102815368501	0.0
s_30961	DLGAP4	862322445492	317873193816
s_26831	DNAJB6	640108584539	0.0
s_15654	RAB3IL1	145931490776	67106563139
s_22444	PPAP2B	461010845859	777023362662
s_69036	CCDC36	159197989937	494469412603
s_27561	IRX5	232163735325	0.0
s_16971	CCL4	517393467295	812342606419
s_33113	SEZ6L	762823701782	0.0
s_26915	SNUPN	265329983228	0.0
s_44037	PCDHA5	404628224423	600427143875
s_32093	ZC3H4	663324958071	141276975029
s_23444	FAM127A	37477860131	67106563139
s_77248	Non-TargetingControl	543926465618	105957731272
s_60948	SUN5	232163735325	388511681331
s_67370	HECTD4	676591457233	388511681331
s_38719	AMOTL2	248746859277	600427143875
s_61952	FAM187B	258696733648	0.0
s_62896	C6orf165	116081867662	0.0
s_36617	CYP2S1	285229731971	0.0
s_17012	CCL18	242113609696	600427143875
s_04819	DLST	37146197652	494469412603
s_29560	SUB1	179097738679	0.0
s_41236	C1orf123	228847110535	116553504399
s_76663	Non-TargetingControl	570459463941	847661850177
s_40899	UHRF1BP1	640108584539	459150168846
s_60230	DNAJC21	179097738679	0.0
s_31051	ZNF510	908755192557	706384875147
s_49546	DYNC2H1	288546356761	0.0
s_06616	FTL	135981616405	388511681331
s_05860	ETV4	248746859277	116553504399
s_59465	EDARADD	109448618082	0.0
s_18069	SPINK2	762823701782	635746387632
s_70112	TAS2R42	271963232809	635746387632
s_57479	GBP4	46764409544	130681201902
s_49270	OR4K1	530659966457	423830925088
s_33226	SMUG1	228847110535	0.0
s_36065	PRPF19	268646608019	102425806896
s_68966	ZBTB8OS	179097738679	0.0
s_49461	SCRN3	198997487421	0.0
s_76407	CT45A9	331662479036	0.0
s_12700	NOS1	301812855922	317873193816
s_46298	SLC7A14	497493718553	0.0
s_01331	ATP1A1	431161222746	635746387632
s_55615	PYGO2	109448618082	0.0
s_65493	OR5A2	663324958071	0.0
s_65387	C11orf45	537293216038	600427143875
s_30501	DDX20	318395979874	197787765041
s_25653	PUM1	596992462264	565107900118
s_51724	PDRG1	596992462264	113021580024
s_53911	HIATL1	222213860954	812342606419
s_33206	PADI4	480910594602	706384875147
s_77346	Non-TargetingControl	786040075314	52978865636
s_62873	HDGFL1	175781113889	116553504399
s_73950	FAM83G	427844597956	0.0
s_51412	APOL5	388045100472	52978865636
s_07427	GOLGB1	630158710168	0.0
s_09502	IL12RB1	537293216038	254298555053
s_66611	MBLAC1	245430234486	353192437574
s_47004	EEFSEC	341612353407	565107900118
s_24576	SLIT2	265329983228	423830925088
s_56875	L3HYPDH	331662479036	109489655648
s_71109	TMEM82	245430234486	0.0
s_29149	ZNF266	56382621436	812342606419
s_04101	NCAN	122715117243	317873193816
s_10097	KCNMB1	388045100472	459150168846
s_29791	ILVBL	477593969811	67106563139
s_03566	COL4A2	228847110535	0.0
s_38987	SCLY	179097738679	0.0
s_03429	CLTB	321712604664	0.0
s_28436	LAMTOR5	179097738679	600427143875
s_37851	ZDHHC9	116081867662	0.0
s_58035	PRAP1	530659966457	0.0
s_56965	LOC113230	159197989937	141276975029
s_04053	CSN1S1	338295728616	254298555053
s_71612	OR56A3	547243090409	918300337691
s_33123	LILRA4	104473680896	134213126278
s_37221	NOX4	232163735325	0.0
s_44480	C8orf4	135981616405	423830925088
s_14235	PLXNB1	202314112212	635746387632
s_63974	OLIG3	155881365147	0.0
s_05605	ENSA	129348366824	52978865636
s_59319	ERICH3	268646608019	105957731272
s_01599	BBS1	441111097117	494469412603
s_07054	GEM	248746859277	423830925088
s_53009	RNASEH2C	729657453878	0.0
s_35230	OR7E24	364828726939	0.0
s_26224	PSMD6	0.663324958071	706384875147
s_23884	MTMR7	258696733648	0.0
s_33867	COG4	325029229455	423830925088
s_01771	BMP1	126031742034	0.0
s_75943	GIMD1	126031742034	600427143875
s_31449	RAB21	225530485744	67106563139
s_69151	AGBL3	311762730293	388511681331
s_03411	CLN5	179097738679	317873193816
s_74549	CT47A6	961821189203	0.0
s_13060	OPRK1	613575586216	0.0
s_32911	SEC11A	524026716876	423830925088
s_68752	ST8SIA6	895488693396	0.0
s_42599	TRIM36	497493718553	0.0
s_34769	FBXL21	169147864308	353192437574
s_51629	ITFG1	271963232809	0.0
s_32320	CLUH	195680862631	201319689417
s_59725	TAF8	271963232809	388511681331
s_23154	WISP3	613575586216	105957731272
s_00428	ADRB2	46432747065	151872748157
s_39461	INPP5K	65669170849	353192437574
s_13869	PHKB	693174581184	635746387632
s_66030	TSPO2	603625711845	141276975029
s_34448	FAM169A	378095226101	52978865636
s_16517	RPS6KA2	55719296478	130681201902
s_74974	ZNF878	212263986583	353192437574
s_01876	BRDT	252063484067	847661850177
s_06215	FER	248746859277	67106563139
s_40394	GTPBP2	451060971488	0.0
s_27665	DNAJA2	245430234486	0.0
s_48974	APOO	238796984906	0.0
s_13207	P2RY6	205630737002	183660067538
s_43438	LRP2BP	331662479036	134213126278
s_36769	UBIAD1	328345854245	188251569227
s_57505	ARHGEF25	325029229455	180128143163
s_62668	ZNF827	215580611373	600427143875
s_33102	SEC14L2	27859648239	953619581449
s_28386	NOP56	116081867662	0.0
s_16979	CCL7	729657453878	353192437574
s_21378	MIA	351562227778	706384875147
s_71841	PTX4	673274832442	222511235671
s_73728	FAM196A	421211348375	123617353151
s_42982	DENND4C	630158710168	812342606419
s_06352	FKBP1B	238796984906	0.0
s_18929	TDG	596992462264	0.0
s_17521	SLC6A2	235480360115	635746387632
s_49293	TTC13	663324958071	0.0
s_71420	FAM180A	215580611373	0.0
s_34699	MTG2	202314112212	812342606419
s_45764	KIAA1328	311762730293	353192437574
s_43563	CISD1	344928978197	0.0
s_39073	ESF1	18573098826	706384875147
s_67783	TPRX1	56382621436	494469412603
s_01221	ART3	368145351729	134213126278
s_34842	KCNG2	407944849214	0.0
s_54473	CIRH1A	530659966457	0.0
s_62003	ZNF570	295179606342	727576421402
s_45454	C3orf14	583725963103	356724361949
s_70662	KRTAP10-7	228847110535	0.0
s_27364	EIF1	444427721908	52978865636
s_22664	BECN1	18241436347	26489432818
s_08916	DNAJB2	484227219392	459150168846
s_08628	TLX2	169147864308	0.0
s_29421	C1QL1	192364237841	0.0
s_65741	FAM26D	795989949685	812342606419
s_16796	SAG	361512102149	0.0
s_46438	GRHL3	0.0	388511681331
s_27002	TSPAN3	474277345021	102425806896
s_30838	GABARAPL2	122715117243	0.0
s_12307	NDUFA10	397994974843	600427143875
s_00231	ACVR2A	149248115566	741704118905
s_60890	GCNT7	437794472327	953619581449
s_37761	PLLP	242113609696	565107900118
s_28569	IFITM2	490860468973	423830925088
s_35362	AKAP8L	215580611373	777023362662
s_18346	STAT2	28191310718	706384875147
s_56098	GGTLC1	235480360115	127149277526
s_54941	LRRCC1	583725963103	353192437574
s_38998	ZNF581	895488693396	0.0
s_52612	TTLL2	325029229455	706384875147
s_15516	PTPRO	696491205975	706384875147
s_45506	GATAD2B	334979103826	442903316717
s_38324	ZNF571	497493718553	0.0
s_54720	TMEM128	56382621436	211915462544
s_08785	HP	112765242872	0.0
s_10074	KCNJ15	0.663324958071	0.0
s_07011	GCNT2	172464489098	0.0
s_18065	SPINK1	570459463941	353192437574
s_76222	MYZAP	115086880225	0.0
s_43176	FAM222B	56382621436	141276975029
s_59261	ATXN7L2	716390954717	565107900118
s_26786	CHAF1A	497493718553	0.0
s_48239	AGXT2	192364237841	600427143875
s_18626	TADA2A	112765242872	459150168846
s_68159	CYP4V2	9286549413	0.0
s_39569	LRP1B	275279857599	384979756955
s_06868	GANC	490860468973	0.0
s_15961	RCVRN	553876339989	0.0
s_26179	ZNF518A	255380108857	0.0
s_22037	OGT	162514614727	353192437574
s_52766	KREMEN1	172464489098	0.0
s_26682	AKT3	610258961425	67106563139
s_61875	ZNF563	208947361792	247234706302
s_64722	GKN2	577092713522	0.0
s_43353	ERMARD	451060971488	0.0
s_58996	C19orf70	238796984906	0.0
s_76393	LOC101929983	232163735325	0.0
s_25636	RAPGEF2	116081867662	0.0
s_77182	Non-TargetingControl	427844597956	918300337691
s_08686	HOXB3	341612353407	257830479429
s_10249	KIF11	106131993291	317873193816
s_12502	NFATC3	407944849214	0.0
s_50778	FRAS1	298496231132	0.0
s_22768	NOL4	235480360115	0.0
s_02390	CAV2	358195477358	0.0
s_41707	THAP1	762823701782	953619581449
s_52689	TMEM133	630158710168	148340823781
s_03630	COL10A1	242113609696	752299892032
s_55292	ZNF30	232163735325	0.0
s_53274	POLR3GL	553876339989	918300337691
s_14606	PPP2CA	378095226101	52978865636
s_60690	APOOL	37146197652	0.0
s_13812	PGK1	285229731971	317873193816
s_03277	CKB	829156197589	268426252556
s_58957	ZNF543	434477847537	120085428775
s_68656	KRTAP19-4	530659966457	0.0
s_37618	ZBTB7B	666641582861	113021580024
s_68355	MICU3	56050958957	0.0
s_21455	USP11	139298241195	0.0
s_03791	CLDN4	454377596279	0.0
s_04330	CYLD	315079355084	238051702925
s_10109	KCNN3	872272319863	600427143875
s_02855	CDH7	232163735325	0.0
s_24923	SH3BP5	37477860131	353192437574
s_36385	C1GALT1C1	159197989937	0.0
s_22028	FKBP6	106131993291	388511681331
s_15298	PTAFR	218897236163	67106563139
s_09451	IL7R	262013358438	0.0
s_51384	ZNF436	829156197589	600427143875
s_09921	JUND	334979103826	16600044566
s_36371	ZC3H7A	895488693396	0.0
s_08499	HMGCL	500810343344	211915462544
s_51516	OR4F17	507443592924	141276975029
s_68887	ARL16	238796984906	0.0
s_22015	TEAD2	368145351729	0.0
s_28723	TXNIP	484227219392	476809790724
s_76961	Non-TargetingControl	245430234486	0.0
s_43242	CCAR1	487543844182	0.0
s_58560	JDP2	56382621436	0.0
s_14305	PNMT	610258961425	0.0
s_03312	CKS1B	298496231132	388511681331
s_39408	WWOX	218897236163	741704118905
s_22764	ABCC3	139298241195	988938825206
s_74029	MT1HL1	368145351729	173064294411
s_18893	TCP1	696491205975	635746387632
s_44852	CCNL1	172464489098	176596218787
s_40615	AHI1	56382621436	953619581449
s_26550	HS3ST3B1	132664991614	0.0
s_20013	UPK3A	441111097117	812342606419
s_64998	STK32A	530659966457	0.0
s_48418	KRI1	28191310718	0.0
s_35283	OR1L1	132664991614	105957731272
s_60563	C9orf41	341612353407	494469412603
s_02478	CCNA2	109448618082	459150168846
s_74682	TSPY4	504126968134	0.0
s_19690	TTC4	298496231132	282553950059
s_02631	CD80	596992462264	282553950059
s_13365	PBX3	663324958071	0.0
s_49805	TTLL7	477593969811	0.0
s_66868	GCSAM	417894723585	0.0
s_14250	PNOC	18241436347	681661404517
s_52156	KATNAL2	663324958071	741704118905
s_65179	TRIML2	262013358438	0.0
s_60362	TRIM40	417894723585	21544738692
s_27527	SPRY1	46764409544	918300337691
s_52729	TSSK6	172464489098	0.0
s_29068	GRAP	308446105503	282553950059
s_05454	EIF4EBP2	596992462264	847661850177
s_73579	HIST2H4B	172464489098	120085428775
s_24997	KIF23	341612353407	102425806896
s_30891	ATF5	47096072023	741704118905
s_40721	WBP1L	368145351729	105957731272
s_45070	LYRM4	265329983228	0.0
s_30053	TRIOBP	397994974843	882981093934
s_17508	SLC5A3	417894723585	317873193816
s_66590	LRRC57	411261474004	847661850177
s_24600	LONP1	643425209329	0.0
s_30000	CNTRL	348245602987	102425806896
s_59949	CHCHD4	461010845859	0.0
s_08427	HLA-DQB1	961821189203	113021580024
s_22092	PPFIBP2	414578098794	0.0
s_76900	Non-TargetingControl	510760217715	116553504399
s_59942	FAM131A	305129480713	423830925088
s_62211	SPATA45	988354187526	356724361949
s_47363	PARVG	895488693396	353192437574
s_03673	COPA	126031742034	706384875147
s_73112	LRRC24	245430234486	52978865636
s_39895	TAS2R5	795989949685	565107900118
s_71270	OR6B2	620208835796	353192437574
s_69397	CD300E	729657453878	52978865636
s_49333	RNF128	268646608019	918300337691
s_58949	CLDND2	308446105503	176596218787
s_32797	AP4E1	378095226101	0.0
s_50306	ZNF613	215580611373	635746387632
s_18381	HSPA13	159197989937	282553950059
s_22453	CADPS	116081867662	0.0
s_13281	PAK2	451060971488	388511681331
s_07451	GP2	454377596279	105957731272
s_57240	TMEM200A	152564740356	494469412603
s_11317	MEF2BNB-MEF2B	242113609696	0.0
s_17291	SH3GL2	122715117243	0.0
s_31744	FSTL4	18573098826	469745941973
s_30267	HHLA3	106795318249	494469412603
s_42291	SLC29A3	487543844182	162468521284
s_13462	PCSK2	212263986583	423830925088
s_41191	THG1L	311762730293	176596218787
s_09810	ITGB4	119398492453	600427143875
s_24255	DLG5	341612353407	116553504399
s_69879	SERINC2	457694221069	0.0
s_00100	ACADL	102815368501	282553950059
s_38055	HAO2	706441080346	146574861593
s_18043	SPAM1	404628224423	123617353151
s_72868	ZNF705A	112765242872	162468521284
s_72545	OR5K2	315079355084	247234706302
s_53349	EIF1AD	152564740356	0.0
s_53613	DOT1L	9286549413	600427143875
s_40176	FAM35A	235480360115	180128143163
s_23114	IQGAP1	142614865985	0.0
s_63000	SGK223	315079355084	0.0
s_64565	NLRP7	507443592924	52978865636
s_42147	IMP3	18904761305	211915462544
s_20831	ZNF214	766140326572	988938825206
s_72065	IQCA1L	195680862631	0.0
s_01501	ATR	208947361792	0.0
s_62077	PM20D1	451060971488	988938825206
s_72677	SCGB1D4	411261474004	847661850177
s_48325	MRPL36	208947361792	0.0
s_19451	TOP3A	527343341667	105957731272
s_14083	PLA2G5	573776088731	0.0
s_17492	SLC4A2	27859648239	882981093934
s_72553	OR2A42	514076842505	0.0
s_13865	PHKA2	497493718553	635746387632
s_22002	TPST2	305129480713	388511681331
s_25388	CELSR1	215580611373	565107900118
s_27963	PEMT	524026716876	109489655648
s_47081	VIPAS39	752873827411	134213126278
s_49211	KREMEN2	391361725262	0.0
s_40564	C17orf59	762823701782	247234706302
s_50195	TCTN2	47096072023	67106563139
s_69331	OR6C4	225530485744	0.0
s_35901	CNTN6	248746859277	882981093934
s_46951	GUF1	646741834119	187191991914
s_76024	CCDC169-SOHLH2	258696733648	0.0
s_17379	SIM1	37477860131	52978865636
s_47352	SMOC2	328345854245	24017085755
s_50041	ZNF552	795989949685	0.0
s_15084	PRTN3	762823701782	0.0
s_25334	NFE2L3	135981616405	741704118905
s_23569	CDKL2	318395979874	194255840665
s_04991	DPH2	441111097117	0.0
s_73197	TARM1	65005845891	635746387632
s_37074	VSX1	391361725262	0.0
s_62851	SNRNP48	218897236163	494469412603
s_72144	PCNXL3	311762730293	494469412603
s_10591	LGALS1	215580611373	0.0
s_50618	UBTD1	600309087054	67106563139
s_54098	MGARP	596992462264	0.0
s_31314	CCT5	46432747065	0.0
s_36265	MRPS18B	112765242872	0.0
s_74139	FAM227A	102815368501	953619581449
s_59368	GJB4	28191310718	67106563139
s_24120	ZW10	504126968134	988938825206
s_25178	CXCL14	381411850891	565107900118
s_60903	CTCFL	567142839151	211915462544
s_64966	TAPT1	56050958957	706384875147
s_08296	HEXB	660008333281	0.0
s_31488	TMCC1	135981616405	353192437574
s_13068	OPRM1	162514614727	600427143875
s_37524	FAHD2A	192364237841	113021580024
s_47840	GPR135	268646608019	0.0
s_08009	GUCY1B3	394678350052	0.0
s_69258	HMX3	215580611373	494469412603
s_00988	APOE	305129480713	0.0
s_36222	TMEM176B	444427721908	0.0
s_45073	MRPL47	248746859277	105957731272
s_64416	C12orf77	65005845891	0.0
s_74730	CCDC169	500810343344	0.0
s_11632	MMP15	660008333281	0.0
s_73346	SPIN2B	729657453878	388511681331
s_15035	LGMN	381411850891	0.0
s_35752	IL37	208947361792	0.0
s_44940	ENTPD7	431161222746	0.0
s_21716	HIST1H3I	145931490776	388511681331
s_66267	HEPACAM2	102815368501	0.0
s_44140	C21orf62	155881365147	494469412603
s_06663	FUT6	378095226101	0.0
s_45617	AHRR	262013358438	812342606419
s_03660	COL17A1	152564740356	0.0
s_52184	PLVAP	242113609696	0.0
s_44332	POLE4	298496231132	113021580024
s_66263	FNDC5	308446105503	0.0
s_42217	ACOXL	172464489098	0.0
s_19802	TYRP1	961821189203	0.0
s_41848	DZANK1	407944849214	0.0
s_41213	C2orf42	507443592924	226043160047
s_38025	MYO15A	222213860954	953619581449
s_37664	CALHM2	361512102149	353192437574
s_53501	HVCN1	298496231132	459150168846
s_37266	IL22	315079355084	0.0
s_67292	HARBI1	394678350052	317873193816
s_72634	PPAPDC2	37477860131	777023362662
s_50704	ZNF614	152564740356	0.0
s_09248	IFNA17	275279857599	0.0
s_57602	ZNF653	520710092086	988938825206
s_42593	ASIC4	311762730293	0.0
s_35851	TNFRSF21	129348366824	706384875147
s_56778	EGLN2	195680862631	918300337691
s_74363	LOC653602	28191310718	882981093934
s_73881	TMEM88B	663324958071	423830925088
s_54014	SLC9A7	527343341667	123617353151
s_49734	TBL1XR1	175781113889	423830925088
s_57051	ZBED6CL	487543844182	953619581449
s_47601	RAB17	27859648239	0.0
s_20254	NELFA	378095226101	0.0
s_33689	DSTYK	175781113889	0.0
s_44206	BEX4	663324958071	105957731272
s_75520	LOC100144595	626842085377	953619581449
s_76546	Non-TargetingControl	991670812316	254298555053
s_06172	FCGRT	232163735325	0.0
s_10271	KPNB1	530659966457	494469412603
s_70518	NAT16	111438592956	127149277526
s_51703	NDEL1	275279857599	0.0
s_25224	MINPP1	18573098826	353192437574
s_56289	MOB1B	305129480713	0.0
s_28761	SPHAR	596992462264	0.0
s_43150	IQCC	298496231132	109489655648
s_13716	CFP	255380108857	67106563139
s_27221	CHST4	331662479036	0.0
s_15437	PTPN9	769456951362	52978865636
s_57370	MRFAP1L1	640108584539	847661850177
s_18323	ST5	729657453878	0.0
s_74706	METTL24	122715117243	0.0
s_20671	ZNF134	305129480713	494469412603
s_46105	MYH7B	258696733648	0.0
s_33481	CADM1	315079355084	0.0
s_22605	EIF3C	334979103826	847661850177
s_09481	IL10RB	454377596279	353192437574
s_28334	MYBBP1A	258696733648	600427143875
s_20207	VWF	381411850891	882981093934
s_73135	C9orf173	331662479036	459150168846
s_62253	IGSF5	56050958957	0.0
s_03518	CNN3	109448618082	0.0
s_74262	XAGE1B	218897236163	0.0
s_34875	TSPAN17	218897236163	0.0
s_61575	C16orf92	338295728616	141276975029
s_16178	RNASE2	616892211006	777023362662
s_60494	ABRA	381411850891	0.0
s_32508	VPS39	139298241195	370852059452
s_41158	C1orf56	162514614727	67106563139
s_68369	TRIQK	530659966457	67106563139
s_77402	Non-TargetingControl	829156197589	130681201902
s_55279	FAM181A	666641582861	812342606419
s_48486	MPPE1	159197989937	706384875147
s_17242	SGCB	318395979874	141276975029
s_33640	TP53TG3	762823701782	812342606419
s_33187	DDAH2	305129480713	812342606419
s_02777	CDK1	46432747065	0.0
s_41877	PBRM1	318395979874	353192437574
s_23617	BRSK2	271963232809	565107900118
s_74763	EIF3CL	795989949685	0.0
s_63740	FAM43B	242113609696	0.0
s_69411	KRT27	109448618082	282553950059
s_04826	DLX2	547243090409	459150168846
s_10019	KCNH1	132664991614	0.0
s_20929	DNALI1	719707579507	194255840665
s_02389	CAV2	119398492453	0.0
s_27517	SRRM1	348245602987	0.0
s_02180	CACNB2	109448618082	0.0
s_20853	ZNF225	378095226101	0.0
s_44476	LGALS14	341612353407	317873193816
s_40839	PIGG	28191310718	0.0
s_58998	MBD3L2	427844597956	162468521284
s_76450	Non-TargetingControl	616892211006	349660513198
s_51622	HM13	298496231132	67106563139
s_64152	PWWP2B	46432747065	0.0
s_63046	SLC7A13	384728475681	155404672532
s_66269	TECRL	348245602987	105957731272
s_37520	EXOSC3	126031742034	706384875147
s_46753	CACNG6	331662479036	123617353151
s_25260	CLOCK	248746859277	211915462544
s_59257	SLC44A3	961821189203	0.0
s_16991	CCL13	699807830765	0.0
s_45435	SCYL1	275279857599	0.0
s_09597	INHA	301812855922	388511681331
s_15991	REG1B	414578098794	0.0
s_66502	OR6C74	487543844182	988938825206
s_61931	LGALS16	205630737002	102425806896
s_22384	TMEFF1	119398492453	317873193816
s_64198	PSORS1C1	149248115566	600427143875
s_10279	KPNA3	305129480713	0.0
s_70837	INSC	255380108857	0.0
s_17947	CAPN15	421211348375	0.0
s_66961	WFDC9	504126968134	158936596908
s_21109	PLA2G7	994987437107	388511681331
s_33089	ADAT1	192364237841	0.0
s_22577	PDE5A	397994974843	0.0
s_44291	SLC2A9	238796984906	0.0
s_15680	RAB13	195680862631	706384875147
s_02562	CD3G	235480360115	0.0
s_42318	C5orf22	776090200943	134213126278
s_64043	CNBD1	321712604664	0.0
s_21913	RECK	315079355084	102425806896
s_04377	CYP2C18	288546356761	423830925088
s_11635	MMP16	411261474004	105957731272
s_39078	AZIN1	663324958071	0.0
s_37134	EHD4	245430234486	0.0
s_70439	FAM89A	288546356761	0.0
s_27145	CLEC3A	895488693396	0.0
s_30884	IKZF2	109448618082	0.0
s_62867	SLC2A12	401311599633	0.0
s_43621	SLC22A11	18573098826	247234706302
s_65373	CCNY	83910607196	0.0
s_12336	NDUFB6	106131993291	0.0
s_56185	GLYATL1	172464489098	0.0
s_67669	GDPD1	46432747065	0.0
s_32094	ZC3H4	504126968134	0.0
s_03375	CLCNKB	135981616405	67106563139
s_76184	RBAK-RBAKDN	126031742034	423830925088
s_45312	ERGIC1	729657453878	882981093934
s_31299	SHANK2	109448618082	16600044566
s_40338	PAF1	222213860954	0.0
s_33827	FBXL2	696491205975	158936596908
s_26661	SLC12A6	696491205975	635746387632
s_04751	DHODH	28191310718	0.0
s_64743	KRTCAP3	205630737002	0.0
s_20784	ZSCAN26	308446105503	0.0
s_22270	PIR	291862981551	0.0
s_57448	RAB42	732974078669	67106563139
s_12473	NEUROD2	414578098794	148340823781
s_02222	CALCR	795989949685	151872748157
s_09850	ITK	179097738679	353192437574
s_62112	LELP1	18241436347	600427143875
s_69482	RD3	46432747065	812342606419
s_63483	ADAD2	192364237841	0.0
s_05305	EEF1A1	729657453878	0.0
s_43483	RNF130	155881365147	105957731272
s_51616	DCSTAMP	318395979874	953619581449
s_53791	MAK16	116081867662	0.0
s_63759	UBL4B	298496231132	0.0
s_49905	ZFHX4	368145351729	494469412603
s_16874	SCN1A	520710092086	317873193816
s_44956	CPA6	550559715199	317873193816
s_22972	RGS9	427844597956	151872748157
s_23862	USP2	364828726939	0.0
s_67604	CDRT4	262013358438	0.0
s_04259	CTSK	192364237841	494469412603
s_19867	UBE2H	331662479036	67106563139
s_62136	MANEAL	275279857599	0.0
s_37304	ARHGEF4	228847110535	0.0
s_66224	STAC3	198997487421	271958176932
s_07719	GRIA4	378095226101	247234706302
s_50599	FAM188A	37477860131	388511681331
s_12567	NFRKB	225530485744	741704118905
s_09086	IBSP	626842085377	123617353151
s_32076	PLEKHM2	155881365147	0.0
s_09828	ITGB7	132664991614	953619581449
s_44851	CCNL1	444427721908	388511681331
s_39919	SEMA5B	318395979874	247234706302
s_47110	MANBAL	139298241195	423830925088
s_23725	SLC7A6	135981616405	0.0
s_77138	Non-TargetingControl	606942336635	706384875147
s_76307	CT45A7	265329983228	130681201902
s_16676	RTN1	198997487421	123617353151
s_68827	C1QTNF9	162514614727	918300337691
s_39056	UFM1	378095226101	0.0
s_35638	CYTH4	102815368501	0.0
s_72654	CUEDC1	215580611373	0.0
s_46239	ZNF317	258696733648	105957731272
s_06342	FIGF	28191310718	0.0
s_36788	NME7	46432747065	52978865636
s_45256	VN1R1	613575586216	0.0
s_72993	LRRC52	344928978197	0.0
s_45952	MKL1	421211348375	388511681331
s_51881	OR2B2	65005845891	0.0
s_70351	HSD11B1L	729657453878	0.0
s_73764	MAP1LC3B2	126031742034	777023362662
s_24806	ECEL1	162514614727	706384875147
s_34603	PRPF31	351562227778	0.0
s_36002	ZNF330	510760217715	847661850177
s_76346	CCDC182	354878852568	102425806896
s_08566	HNMT	517393467295	0.0
s_23109	LIN7A	547243090409	0.0
s_19006	TFAP2A	83578944717	310809345065
s_62127	DCST1	37146197652	109489655648
s_06331	FHL1	666641582861	0.0
s_66697	ZNF549	477593969811	0.0
s_15875	RB1	699807830765	67106563139
s_21212	SLC25A16	328345854245	388511681331
s_14189	PLOD1	407944849214	127149277526
s_09260	IFNAR2	18904761305	0.0
s_62812	ARSK	434477847537	250766630677
s_22081	PRSS12	159197989937	0.0
s_09786	ITGAM	285229731971	0.0
s_19696	TTF1	18573098826	565107900118
s_53987	USP32	414578098794	0.0
s_76428	LOC102724862	132664991614	0.0
s_24993	PSMF1	129348366824	953619581449
s_09515	IL13RA1	955187939622	105957731272
s_46096	COL20A1	129348366824	0.0
s_09464	IL9	155881365147	918300337691
s_52806	MAGT1	202314112212	243702781926
s_16374	RPL22	245430234486	0.0
s_55487	GADD45GIP1	132664991614	0.0
s_27795	MRVI1	729657453878	674597555766
s_36299	MCTS1	55719296478	706384875147
s_13071	SIX6	46432747065	353192437574
s_54666	DISP1	18904761305	0.0
s_33343	CBLC	74624057783	882981093934
s_28331	APPBP2	636791959748	229575084423
s_59019	ZNF441	169147864308	0.0
s_45479	TENM2	334979103826	0.0
s_73390	CISD2	155881365147	211915462544
s_24291	GCNT3	368145351729	105957731272
s_75811	CCDC180	630158710168	158936596908
s_11312	MECP2	494177093763	0.0
s_64883	RDM1	994987437107	0.0
s_61357	C12orf60	961821189203	0.0
s_46021	KIAA1467	155881365147	741704118905
s_45395	RHOJ	159197989937	353192437574
s_04347	CYP2A6	862322445492	0.0
s_10938	MAB21L1	262013358438	127149277526
s_13941	PIGF	116081867662	0.0
s_22899	CDS2	129348366824	0.0
s_57710	GINM1	262013358438	812342606419
s_19449	TOP3A	570459463941	882981093934
s_30182	PTPRT	364828726939	0.0
s_58554	NOXRED1	537293216038	130681201902
s_77147	Non-TargetingControl	524026716876	0.0
s_29092	NUP50	865639070283	148340823781
s_25339	RNF14	334979103826	67106563139
s_49654	YRDC	298496231132	0.0
s_58012	OLFM3	195680862631	0.0
s_12180	NAGLU	454377596279	113021580024
s_09058	HTR6	129348366824	0.0
s_39445	C9orf78	275279857599	247234706302
s_10171	KIF5C	331662479036	127149277526
s_06318	FGR	202314112212	706384875147
s_50038	MOB3B	444427721908	282553950059
s_35018	FAM162A	587042587893	208383538168
s_11736	MRC1	461010845859	812342606419
s_71161	FLG2	46764409544	0.0
s_02861	CDH9	646741834119	105957731272
s_74373	PRAMEF15	18904761305	0.0
s_11263	SMCP	593675837474	317873193816
s_22181	HAT1	358195477358	565107900118
s_01673	OPN1SW	258696733648	67106563139
s_12343	NDUFB8	198997487421	67106563139
s_26729	HDAC6	537293216038	423830925088
s_63473	FSIP1	106131993291	0.0
s_46552	ZBED5	315079355084	0.0
s_23057	CCNK	640108584539	459150168846
s_14490	PPARA	291862981551	176596218787
s_05145	DUSP2	135981616405	211915462544
s_34329	ZZZ3	298496231132	565107900118
s_55106	WNT3A	610258961425	565107900118
s_71816	UBAP1L	268646608019	918300337691
s_12273	NDUFA3	28191310718	847661850177
s_59506	PIFO	165831239518	0.0
s_07511	GPR6	179097738679	565107900118
s_27046	KIF20A	248746859277	282553950059
s_15936	RBP1	321712604664	0.0
s_59262	ATXN7L2	265329983228	0.0
s_64718	TET3	895488693396	0.0
s_56906	MED8	285229731971	0.0
s_41422	C19orf60	122715117243	0.0
s_07705	GRIA1	580409338312	0.0
s_03643	COL12A1	663324958071	0.0
s_74874	NUTM2B	298496231132	141276975029
s_12656	NMBR	570459463941	317873193816
s_41684	FAM90A1	0.331662479036	0.0
s_66445	CNIH2	348245602987	600427143875
s_73762	MAP1LC3B2	179097738679	0.0
s_47979	GAREM	205630737002	0.0
s_62440	ZSWIM2	368145351729	236638933174
s_14540	PPID	308446105503	0.0
s_73726	FAM196A	334979103826	706384875147
s_66163	DEFB121	829156197589	0.0
s_47951	SMYD3	520710092086	600427143875
s_24281	MSC	729657453878	353192437574
s_70048	RAET1G	315079355084	0.0
s_12689	NOP2	630158710168	565107900118
s_16018	REST	431161222746	0.0
s_03067	CFL1	101157056106	21544738692
s_77317	Non-TargetingControl	364828726939	236638933174
s_68492	TUSC5	507443592924	148340823781
s_58043	CHCHD1	325029229455	988938825206
s_19338	TMPO	228847110535	0.0
s_23103	FGF16	0.331662479036	0.0
s_73851	ZFP62	93197156609	812342606419
s_52769	TMPRSS13	65005845891	882981093934
s_76574	Non-TargetingControl	83910607196	113021580024
s_07065	GFI1	271963232809	882981093934
s_28681	RBCK1	129348366824	706384875147
s_43909	PCDHGA11	285229731971	123617353151
s_09023	HTR1D	397994974843	0.0
s_59966	LRRC15	212263986583	0.0
s_75041	C16orf52	65005845891	706384875147
s_59455	C1orf131	265329983228	0.0
s_52462	GRWD1	288546356761	0.0
s_34208	KIAA1429	334979103826	158936596908
s_12256	NCL	341612353407	0.0
s_69781	OR1J1	238796984906	777023362662
s_69876	SLC35B2	378095226101	0.0
s_31424	RIMS1	285229731971	0.0
s_01439	ATP5G3	212263986583	0.0
s_66620	ZNF718	328345854245	211915462544
s_67670	GDPD1	606942336635	741704118905
s_44355	MUC13	301812855922	158936596908
s_12114	MYO6	65005845891	0.0
s_41424	NRDE2	132664991614	0.0
s_27579	ZMPSTE24	660008333281	67106563139
s_58718	CDYL2	198997487421	0.0
s_32078	PLEKHM2	497493718553	0.0
s_71282	FAM212A	275279857599	423830925088
s_31792	CLASP2	729657453878	0.0
s_57343	C1QTNF5	265329983228	0.0
s_24862	MAP4K4	643425209329	0.0
s_27717	RTN3	676591457233	635746387632
s_46743	CACNG8	315079355084	0.0
s_28515	AKAP3	354878852568	600427143875
s_25974	DLGAP5	696491205975	176596218787
s_56085	FAM58A	490860468973	0.0
s_76677	Non-TargetingControl	288546356761	0.0
s_68540	DHRS4L2	135981616405	120085428775
s_76178	TVP23C-CDRT4	630158710168	109489655648
s_22715	S1PR4	497493718553	494469412603
s_42353	ACER3	18573098826	777023362662
s_52101	INO80B	500810343344	0.0
s_03698	MAP3K8	109448618082	0.0
s_35800	C5AR2	162514614727	0.0
s_42176	ZNF654	305129480713	130681201902
s_21008	FZD5	265329983228	0.0
[truncated: 76,668 more rows]

## Sheet: CRISPR screen_count
sgRNA	Gene	control_2	survivor_2
[truncated: 77,441 more rows]
